# Supplementary material for: Mechanism of photocatalytic CO2 reduction to HCO2H by a robust multifunctional iridium complex
Source: Royal Society of Chemistry journal article supplement (doi:10.1039/d3dt03329e), 2023-12-05
Supplement: d3dt03329e1.pdf [file d3dt03329e1.pdf]

**Supporting information:**

# **Mechanism of Photocatalytic CO<sub>2</sub> Reduction to HCO<sub>2</sub>H by a Robust Multifunctional Iridium Complex**

Ya-Qiong Zhang<sup>a,b</sup>, Yu Zhang<sup>b</sup>, Guoping Zeng<sup>b</sup>, Man Li<sup>\*a</sup>, and Rong-Zhen Liao<sup>\*a</sup>

<sup>a</sup>Key Laboratory of Material Chemistry for Energy Conversion and Storage, Ministry of Education, Hubei Key Laboratory of Bioinorganic Chemistry and Materia Medica, Hubei Key Laboratory of Materials Chemistry and Service Failure, School of Chemistry and Chemical Engineering, Huazhong University of Science and Technology, Wuhan, 430074, China

<sup>b</sup>Hubei Key Laboratory of Purification and Application of Plant Anti-Cancer Active Ingredients, College of Chemistry and Life Science, Hubei University of Education, Wuhan, 430205, China

\*Corresponding author: manli\_hx@hust.edu.cn; rongzhen@hust.edu.cn

## Contents

|                                                             |    |
|-------------------------------------------------------------|----|
| 1. Computational details .....                              | 3  |
| 2. The nature of the BIH .....                              | 4  |
| 3. Several possible conformers of <sup>1</sup> Cl-3-H. .... | 5  |
| 4. The computed UV-Vis absorption spectra.....              | 6  |
| 5. Redox properties of Ir complex Mes-IrPCY2.....           | 7  |
| 6. Pathway I. ....                                          | 8  |
| 7. Pathway II. ....                                         | 9  |
| 8. Pathway III.....                                         | 17 |
| 9. Energies. ....                                           | 23 |
| 10. Cartesian coordinates.....                              | 25 |

## 1. Additional computational results

**Table S1.** The experimental and calculated  $\Delta E$  (V) in water for related reactions

| Reaction                                                                                | $\Delta E_{\text{exp}}$ (V) | $\Delta E_{\text{cal}}$ (V) |
|-----------------------------------------------------------------------------------------|-----------------------------|-----------------------------|
| $\text{CO}_2 + 2\text{e}^- + 2\text{H}^+ = \text{HCO}_2\text{H}$ <sup>a</sup>           | -0.61                       | -0.47                       |
| $\text{CO}_2 + 2\text{e}^- + 2\text{H}^+ = \text{H}_2\text{O} + \text{CO}$ <sup>a</sup> | -0.53                       | -0.54                       |
| $2\text{e}^- + 2\text{H}^+ = \text{H}_2$                                                | -0.41                       | -0.34                       |

<sup>a</sup>The concentration correction of 1.9 kcal mol<sup>-1</sup> at 298.15 K was added, which originates from the free energy change from 1 atm (24.5 L mol<sup>-1</sup> for ideal gas) to 1 M (1 mol L<sup>-1</sup> in water). The correction for water (standard concentration of 55.56 mol L<sup>-1</sup>) is 4.3 kcal mol<sup>-1</sup>, respectively. It should be noted that the redox potentials are sensitive to the reaction solvent.

**Table S2.** The energies for some intermediates in their low-spin and high-spin state.

| Species       | Relative Gibbs free energy (in kcal mol <sup>-1</sup> ) |                 |
|---------------|---------------------------------------------------------|-----------------|
|               | low-spin state                                          | high-spin state |
| <b>CI-3-H</b> | 0.0                                                     | 59.7            |
| <b>CI-2-H</b> | 0.0                                                     | 61.5            |
| <b>3-H</b>    | 0.0                                                     | 51.8            |
| <b>2-H</b>    | 0.0                                                     | 57.8            |
| <b>1-H</b>    | 0.0                                                     | 12.6            |
| <b>1-OCHO</b> | 0.0                                                     | 18.1            |
| <b>1</b>      | 0.0                                                     | 18.4            |

The energies of critical intermediates at their low spin-state and high-spin state have been calculated and the results indicated that, for each species, the low-spin state is thermodynamically much more favored over the high-spin state. Therefore, unless otherwise mentioned, the energies and structures reported are in their low-spin state.

## 2. The nature of the BIH

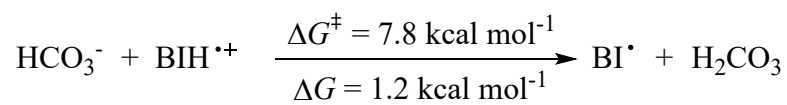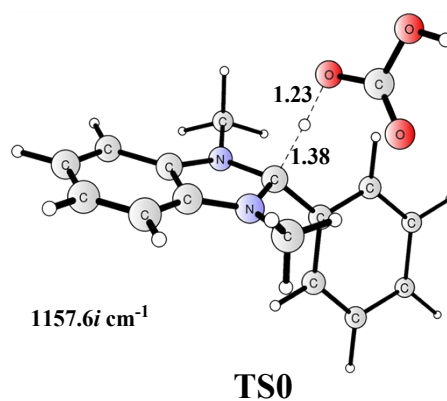

**Figure S1.** Optimized structure of **TS0**. Distances are given in Ångström, and the imaginary frequency for **TS0** is shown.

**Table S3.** The computed  $pK_a$ s of the related species in the reaction medium.

| Species                        | $pK_a$ |
|--------------------------------|--------|
| H <sub>2</sub> CO <sub>3</sub> | 13.4   |
| BIH-H <sup>+</sup>             | 4.1    |
| BIH <sup>+</sup>               | 13.7   |
| HCO <sub>2</sub> H             | 12.9   |
| <b><sup>1</sup>3-H</b>         | 19.8   |
| <b><sup>3</sup>3-H</b>         | -4.7   |

### 3. Several possible conformers of <sup>1</sup>Cl-3-H.

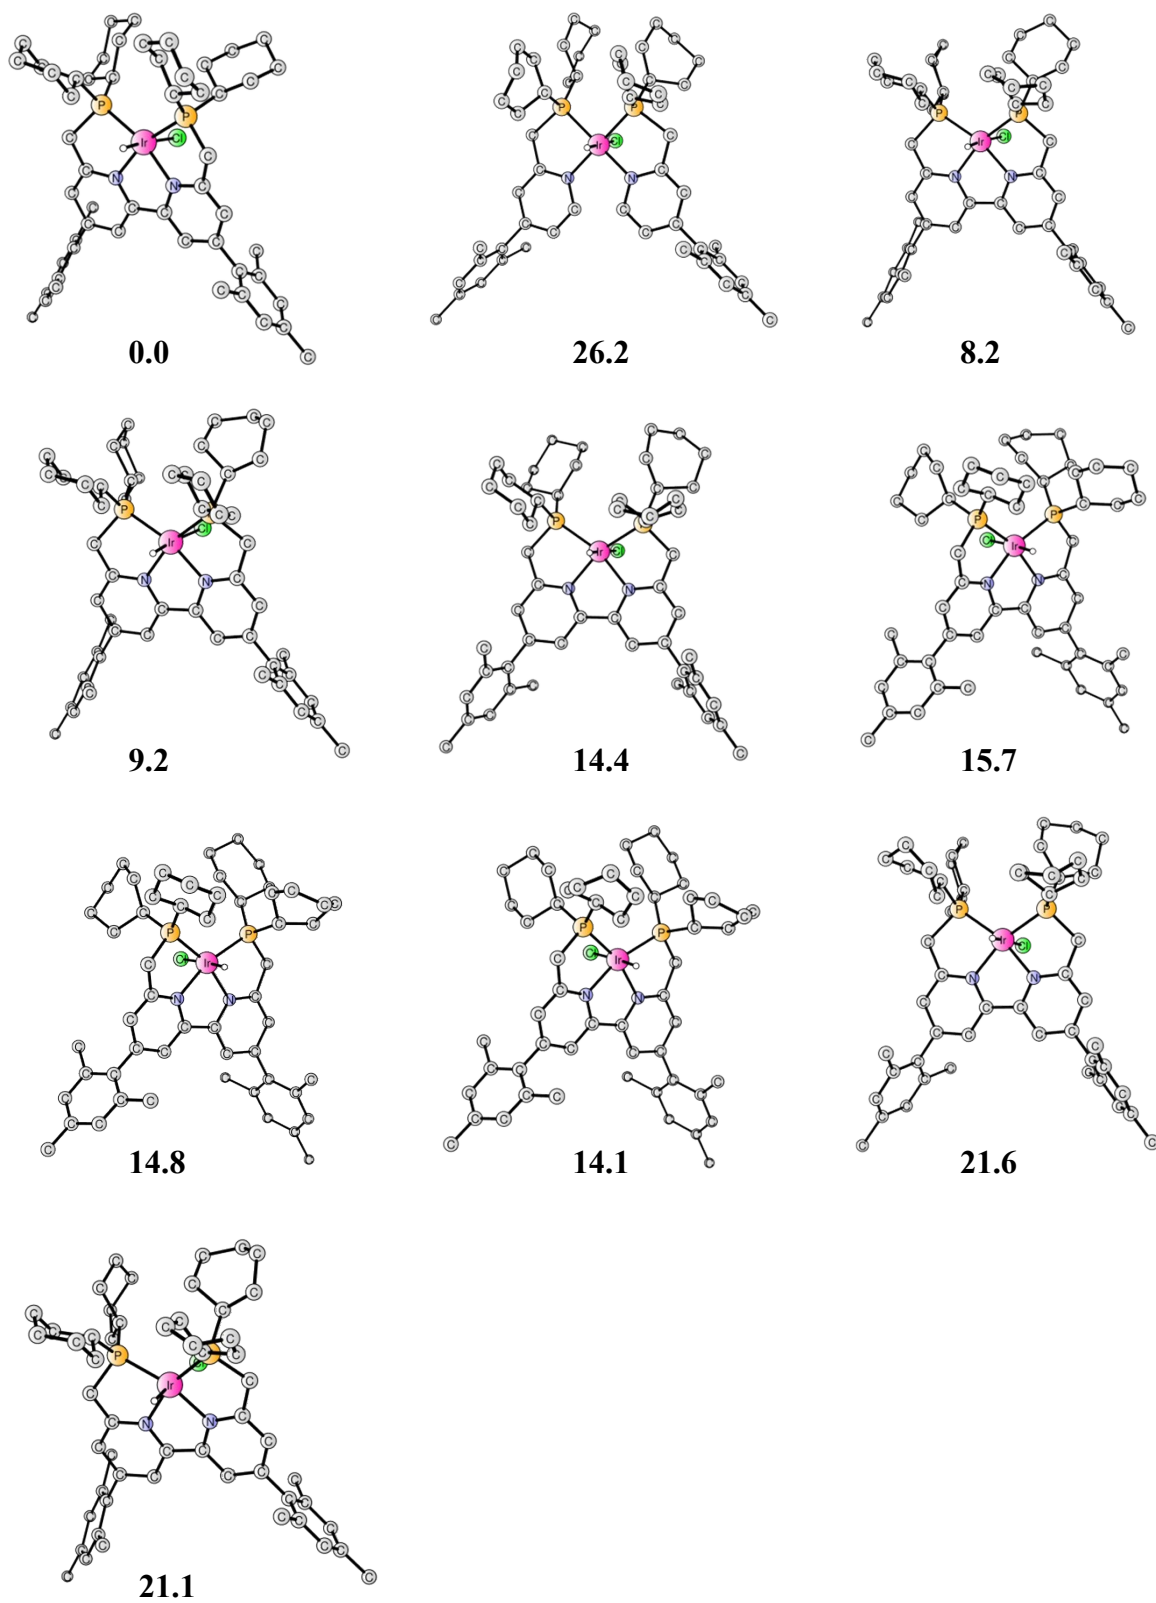

**Figure S2.** Relative Gibbs free energies (in kcal mol<sup>-1</sup>) of possible conformers of <sup>1</sup>Cl-3-H. Unimportant hydrogen atoms are omitted for clarity.



## 5. Redox properties of Ir complex Mes-IrPCY2

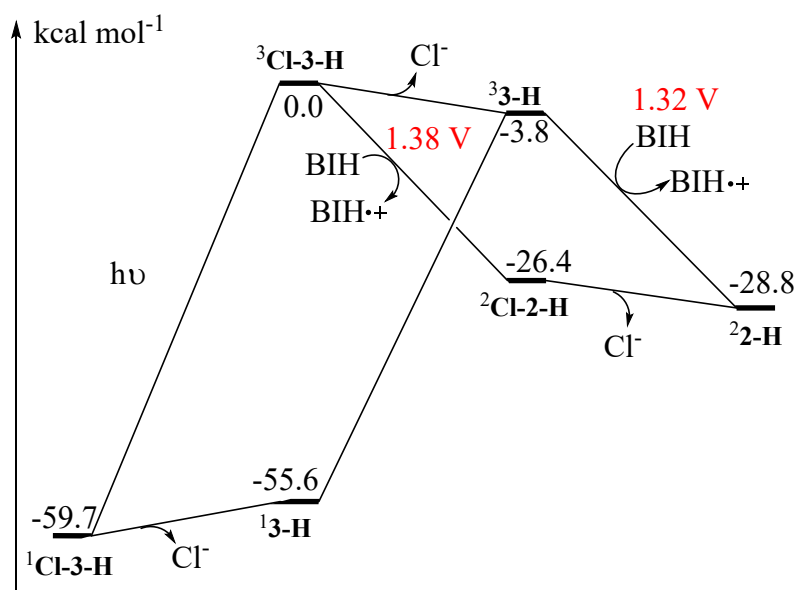

**Figure S4.** Gibbs free energy diagram (in kcal mol<sup>-1</sup>) for the first reduction step of the catalyst in DMA.

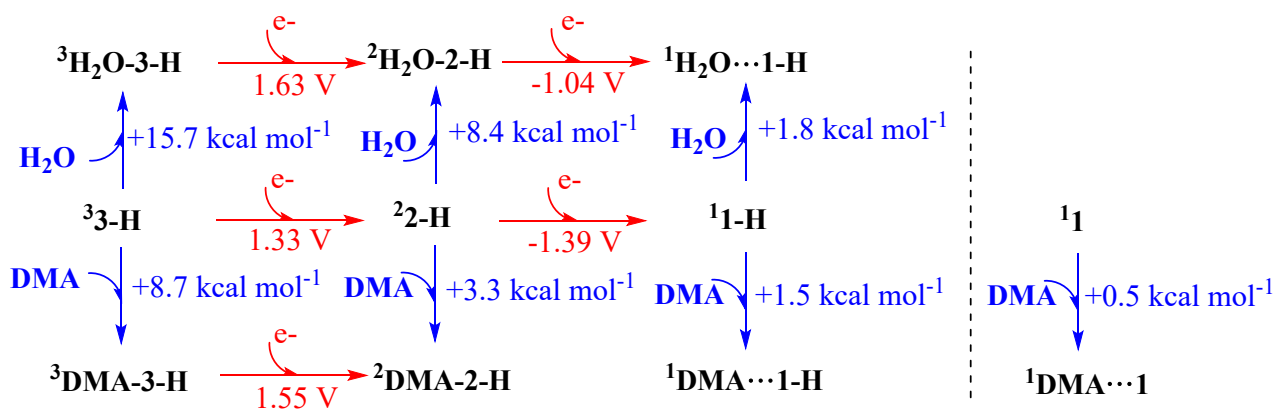

**Scheme S1.** Possible solvent coordination manners to critical iridium species including 3-H, 2-H, 1-H, and 1, and related redox potentials (in red) and reaction free energies (in blue).

## 6. Pathway I.

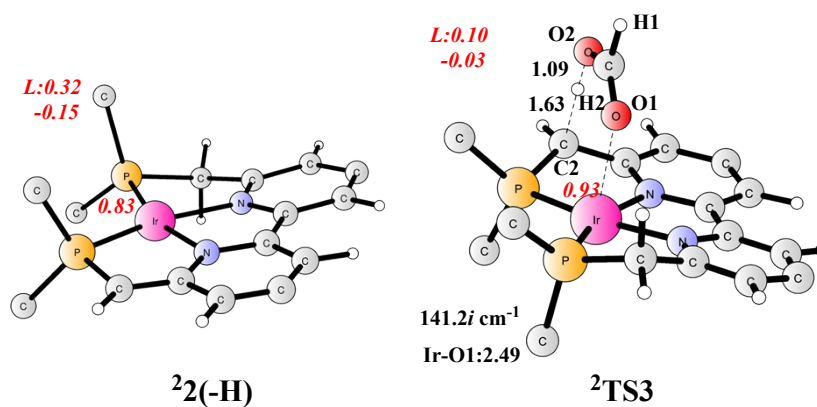

**Figure S5.** The optimized structures of  ${}^2\mathbf{2}(-\mathbf{H})$  (total charge of +1) and  ${}^2\mathbf{TS3}$  (total charge of +1). The spin multiplicities of the species are indicated by the numbers in the left superscript. Distances are given in Ångströms. The spin populations of Ir and the ligand are shown in red italic and the imaginary frequencies for all transition states are also shown. For clarity, the four Cy groups are shown with only one C atom, two trimethylphenyl groups and unimportant hydrogen atoms are not shown.



## 7. Pathway II.

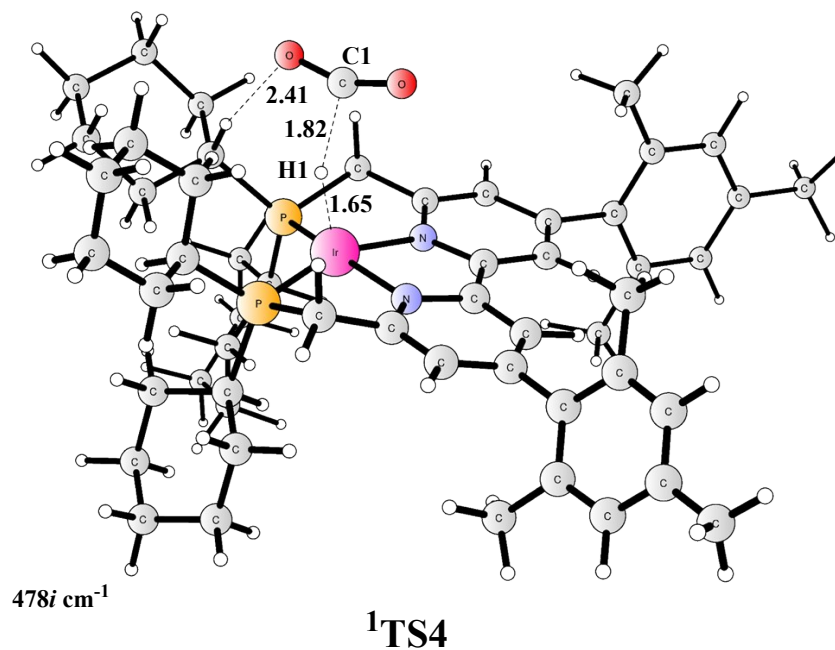

**Figure S6.** The whole optimized structures of <sup>1</sup>TS4 (total charge of 0). The spin multiplicities of the species are indicated by the numbers in the left superscript. Distances are given in Ångstroms. The imaginary frequency is also shown.

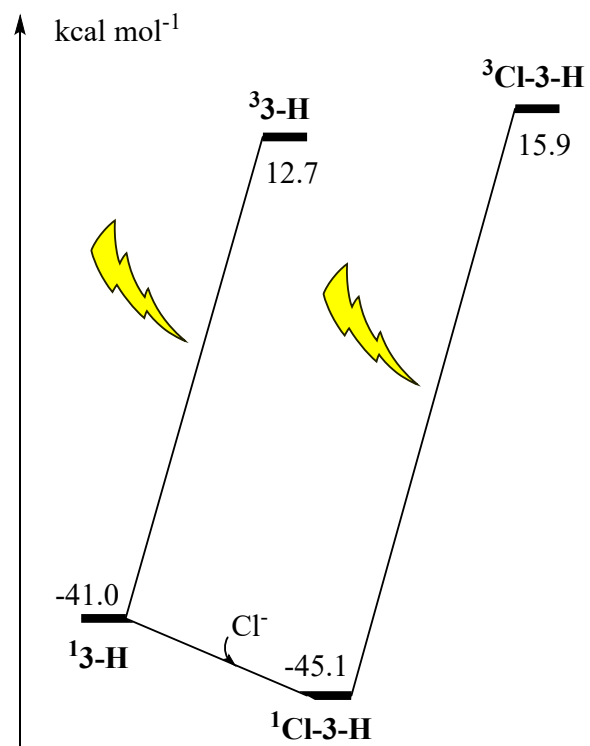

**Figure S7.** Gibbs free energy diagram (in kcal mol<sup>-1</sup>) for the starting of the second catalytic cycle.

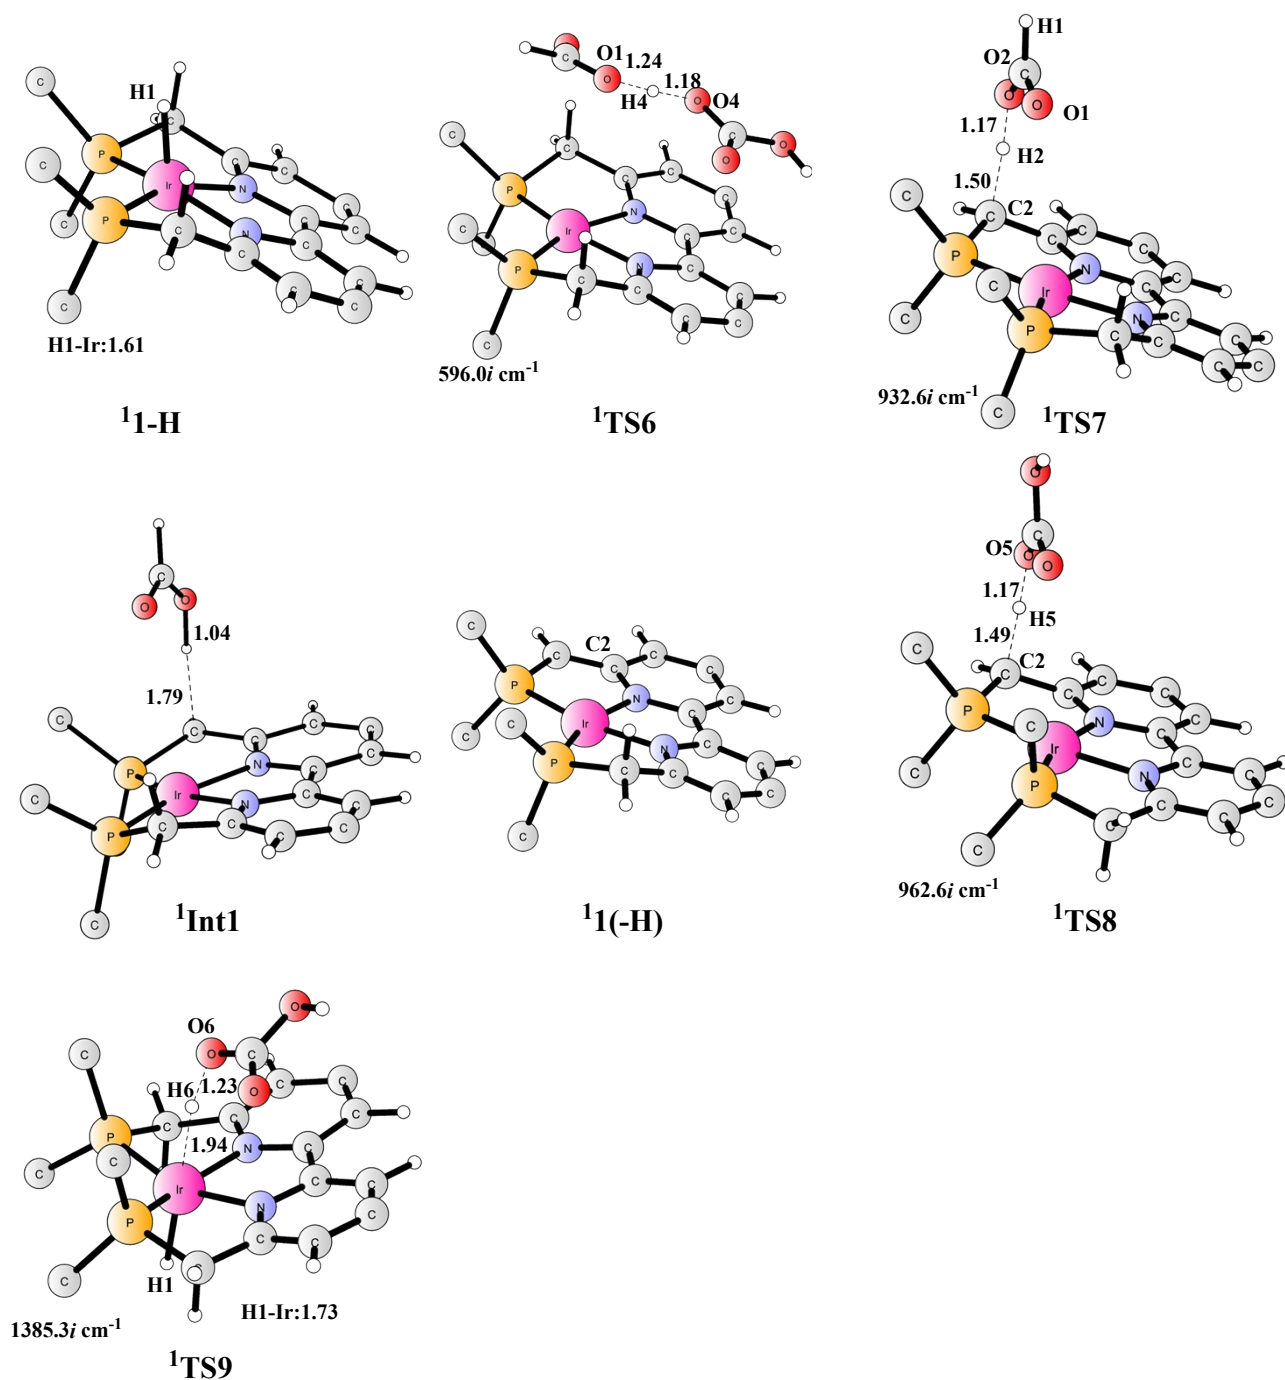

**Figure S8.** The optimized structures of <sup>1</sup>1-H (total charge of 0), <sup>1</sup>TS6 (total charge of 0), <sup>1</sup>TS7 (total charge of 0), <sup>1</sup>Int1 (total charge of 0), <sup>1</sup>1(-H) (total charge of 0), <sup>1</sup>TS8 (total charge of 0), and <sup>1</sup>TS9 (total charge of 0). The spin multiplicities of the species are indicated by the numbers in the left superscript. Distances are given in Ångstroms. The imaginary frequencies for all transition states are also shown. For clarity, the four Cy groups are shown with only one C atom, two trimethylphenyl groups and unimportant hydrogen atoms are not shown.

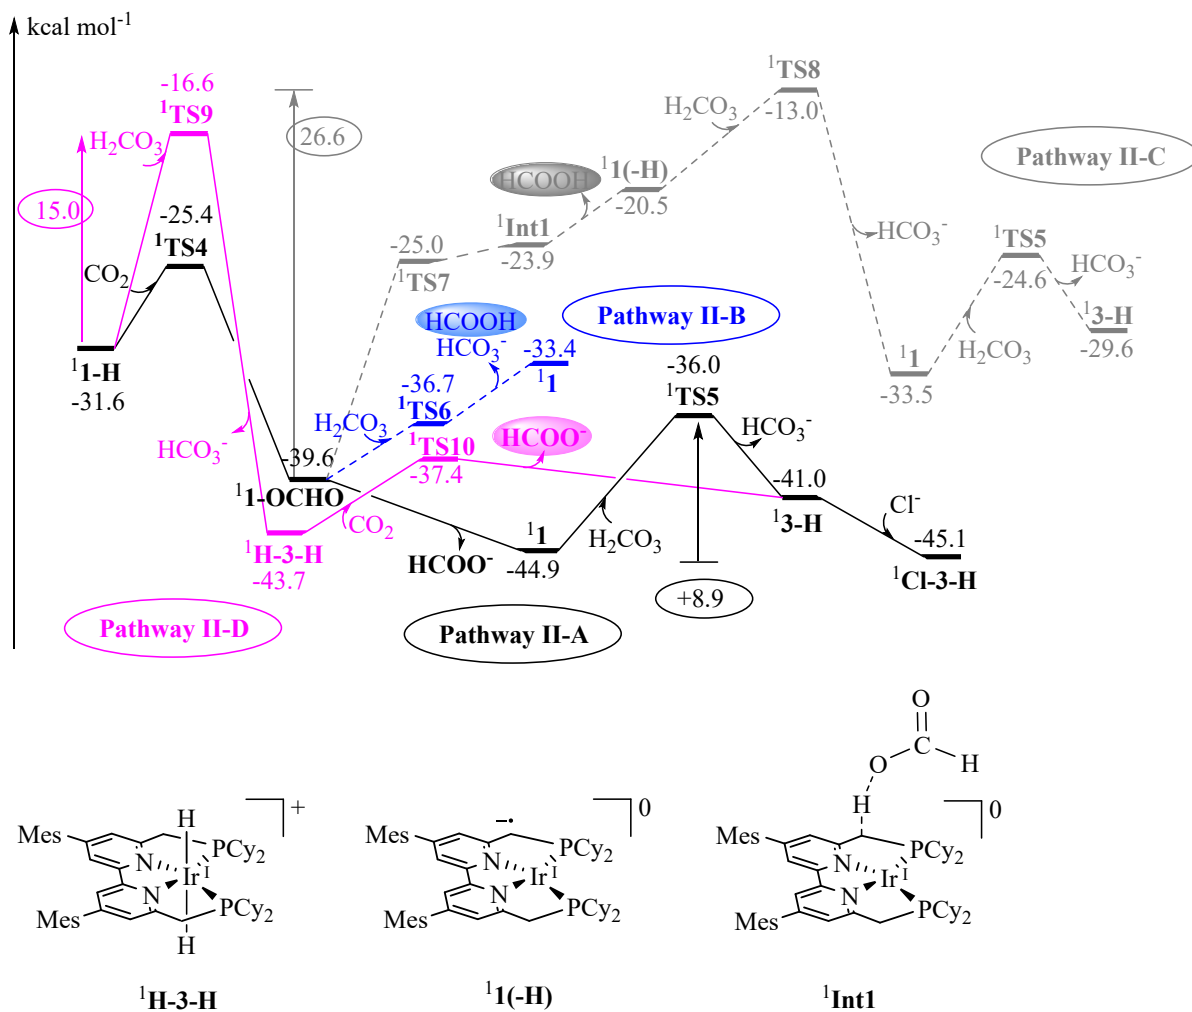

**Figure S9.** Gibbs free energy diagram (in kcal mol<sup>-1</sup>) for the reduction of CO<sub>2</sub> from <sup>1</sup>**1-H** complex.

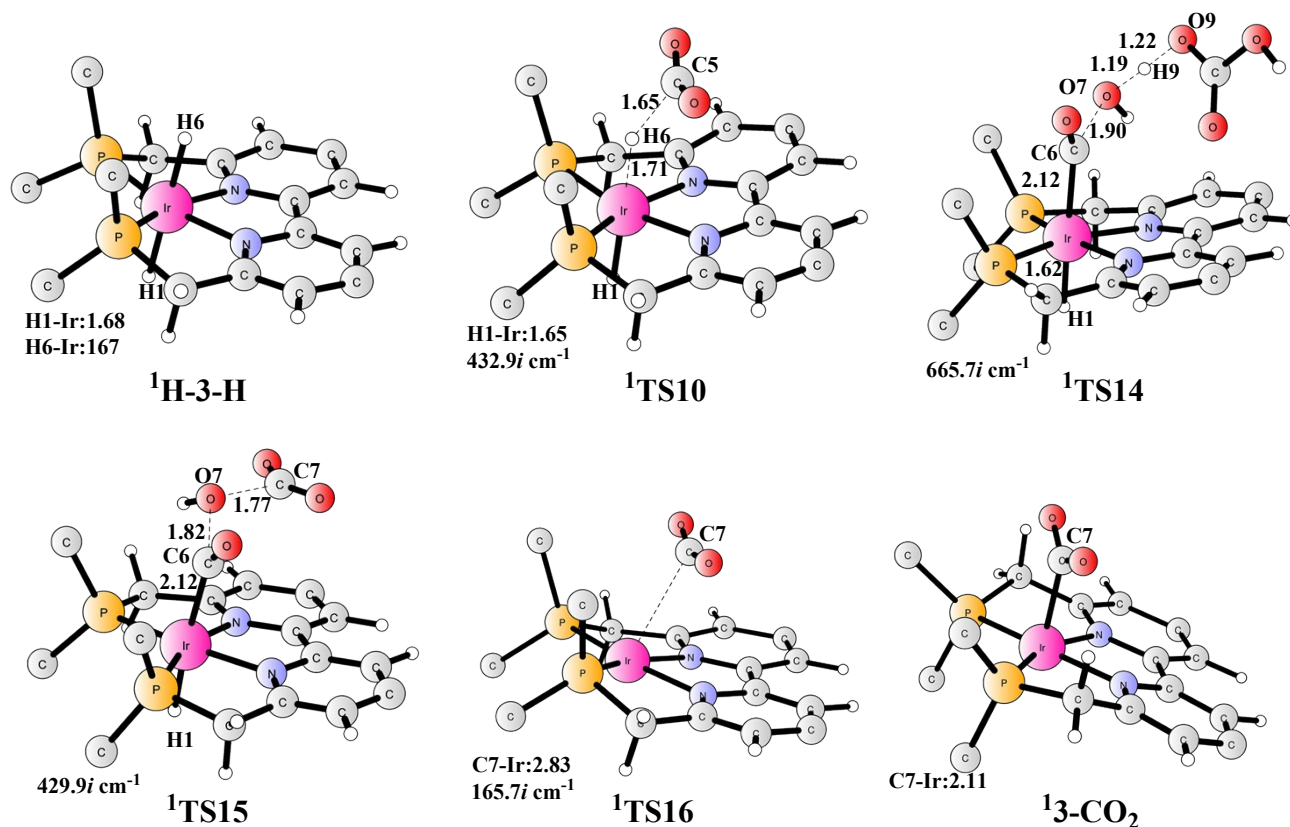

**Figure S10.** The optimized structures of  $^1\text{H-3-H}$  (total charge of +1),  $^1\text{TS10}$  (total charge of +1),  $^1\text{TS14}$  (total charge of +1),  $^1\text{TS15}$  (total charge of +1),  $^1\text{TS16}$  (total charge of +1) and  $^1\text{3-CO}_2$  (total charge of +1). The spin multiplicities of the species are indicated by the numbers in the left superscript. Distances are given in Ångstroms. The imaginary frequencies for all transition states are also shown. For clarity, the four Cy groups are shown with only one C atom, two trimethylphenyl groups and unimportant hydrogen atoms are not shown. It should be pointed out that, for  $^1\text{H-3-H}$ , a small imaginary frequency (35.6i) corresponding to a low energy torsion mode could not be eliminated after many attempts, and it does not affect the conclusion in the present work.

**Table S4.** The barriers (in kcal mol<sup>-1</sup>) for **TS4** and **TS11** calculated with different functionals.

| Transition state | Barriers (in kcal mol <sup>-1</sup> ) |        |          |
|------------------|---------------------------------------|--------|----------|
|                  | B3LYP-D3                              | M06-D3 | TPSSH-D3 |
| <b>TS4</b>       | 6.2                                   | 9.7    | 5.4      |
| <b>TS11</b>      | 8.1                                   | 10.0   | 6.0      |

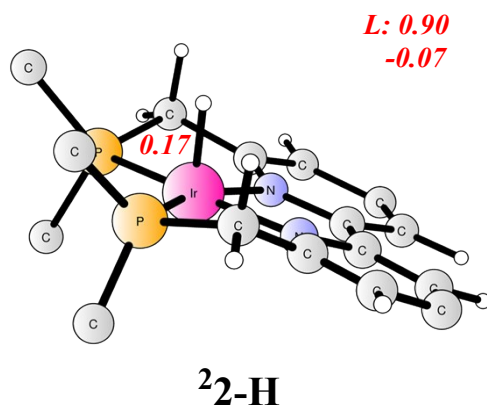

**Figure S11.** The optimized structure of **<sup>2</sup>2-H** (total charge of +1). The spin multiplicities of the species are indicated by the numbers in the left superscript. Distances are given in Ångstroms. The spin populations of Ir and the ligand are shown in red italic and the imaginary frequencies for all transition states are also shown. For clarity, the four Cy groups are shown with only one C atom, two trimethylphenyl groups and unimportant hydrogen atoms are not shown.

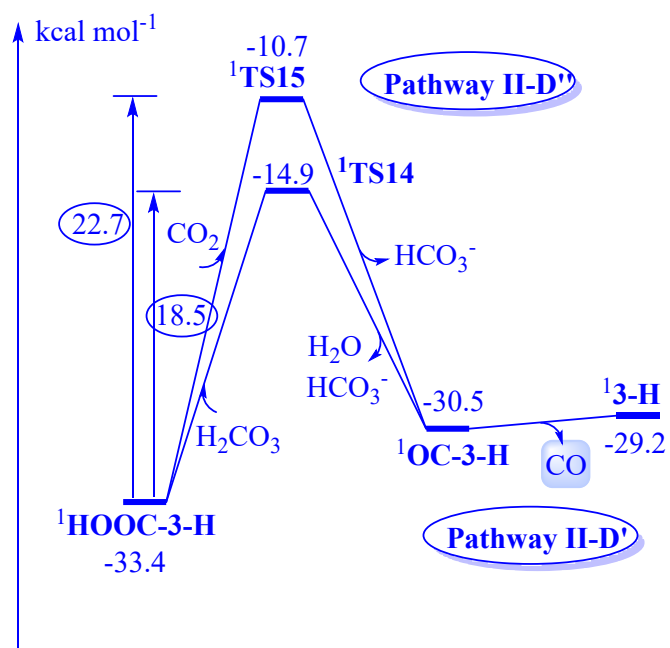

**Figure S12.** Gibbs free energy diagram (in kcal mol<sup>-1</sup>) for the formation of CO from the  ${}^1\text{HOOC-3-H}$  complex.

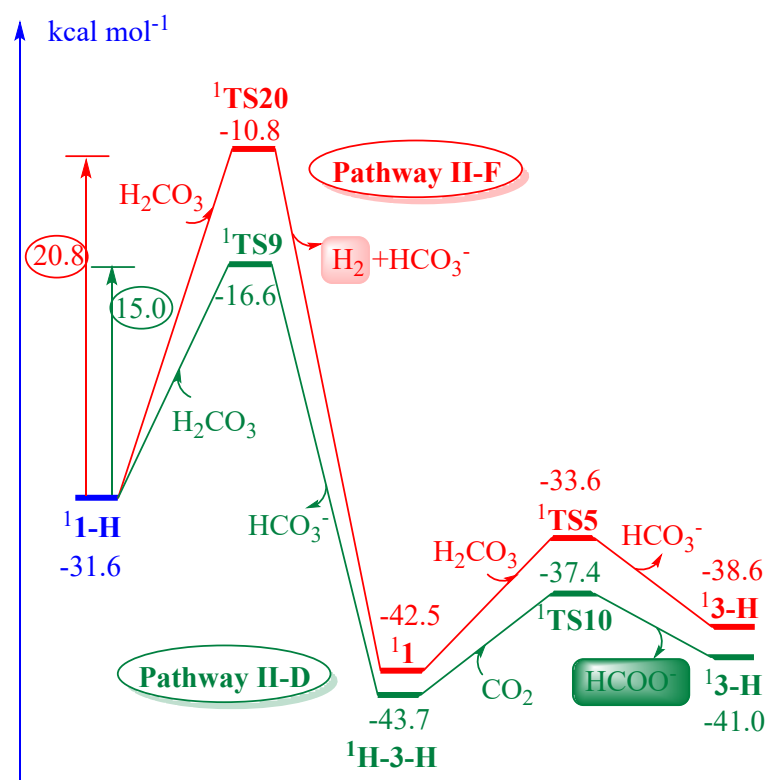

**Figure S13.** Gibbs free energy diagram (in  $\text{kcal mol}^{-1}$ ) for the comparison of pathway II-D and pathway II-F from the  ${}^1\mathbf{1-H}$  complex.



## 8. Pathway III.

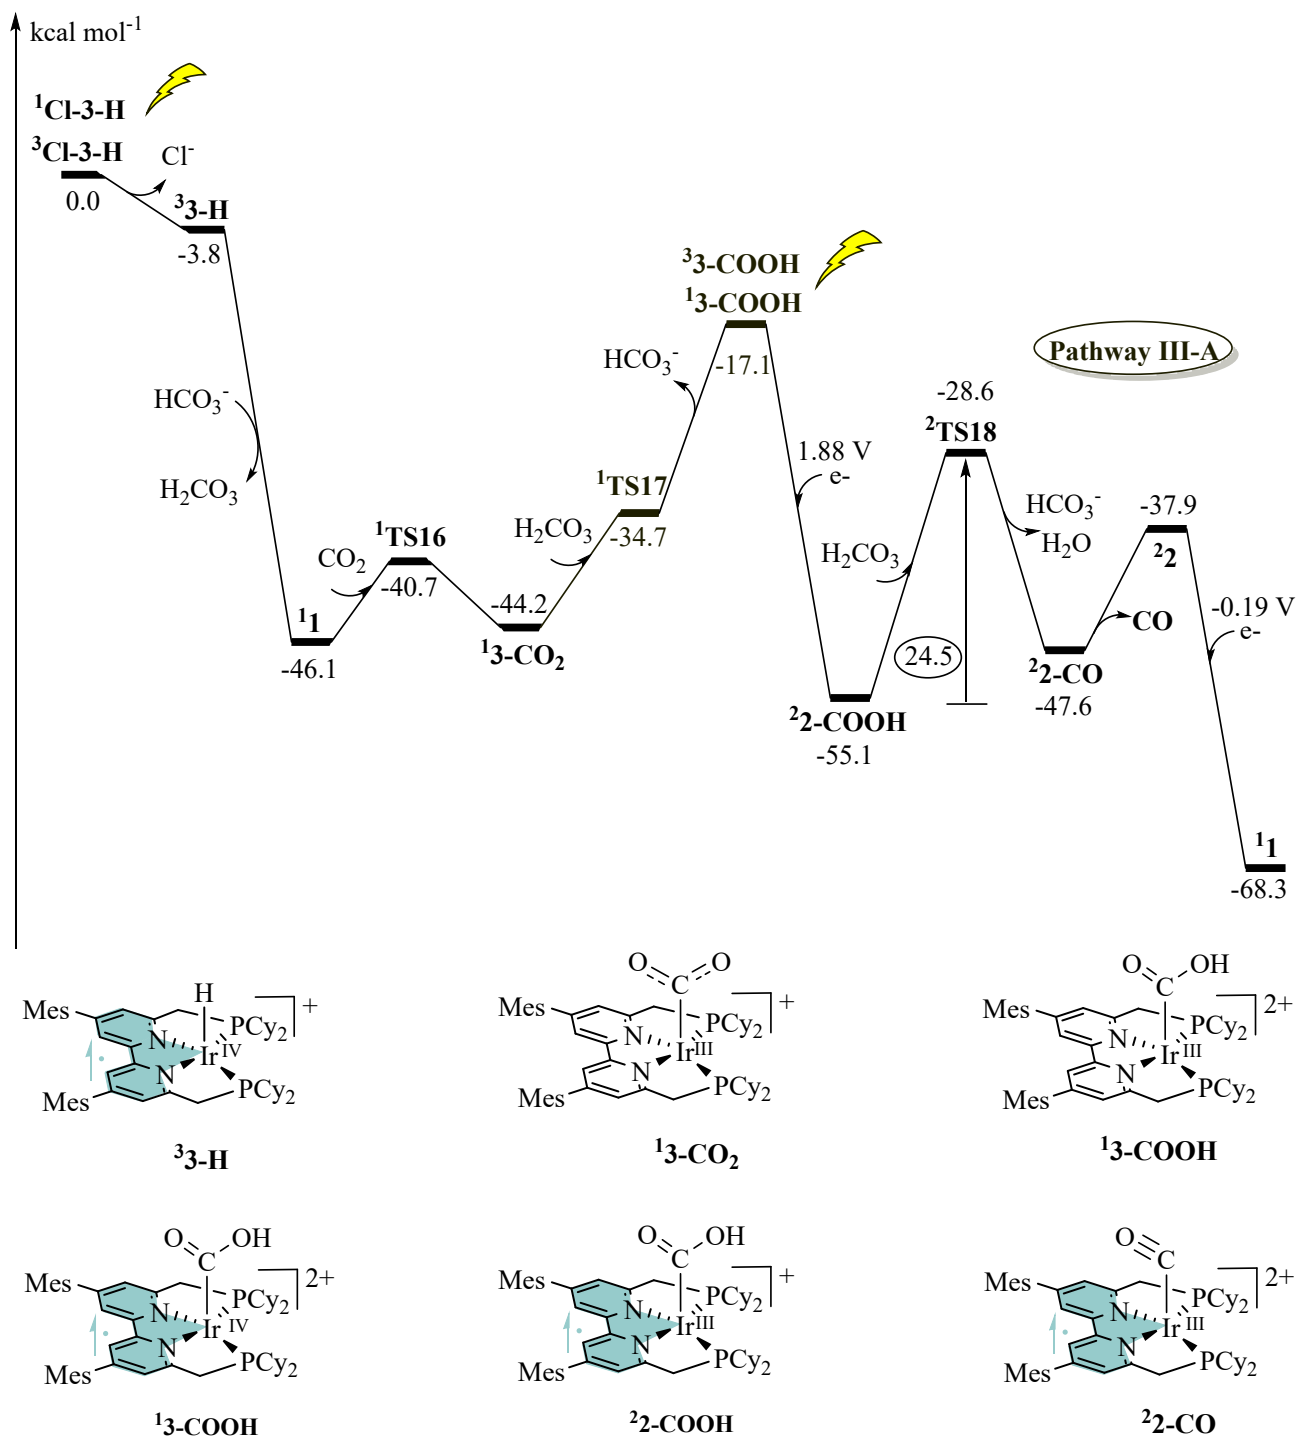

**Figure S14.** Gibbs free energy diagram (in kcal mol<sup>-1</sup>) for the reduction of CO<sub>2</sub> to CO involving the deprotonation of Cl-3-H under photoexcitation.

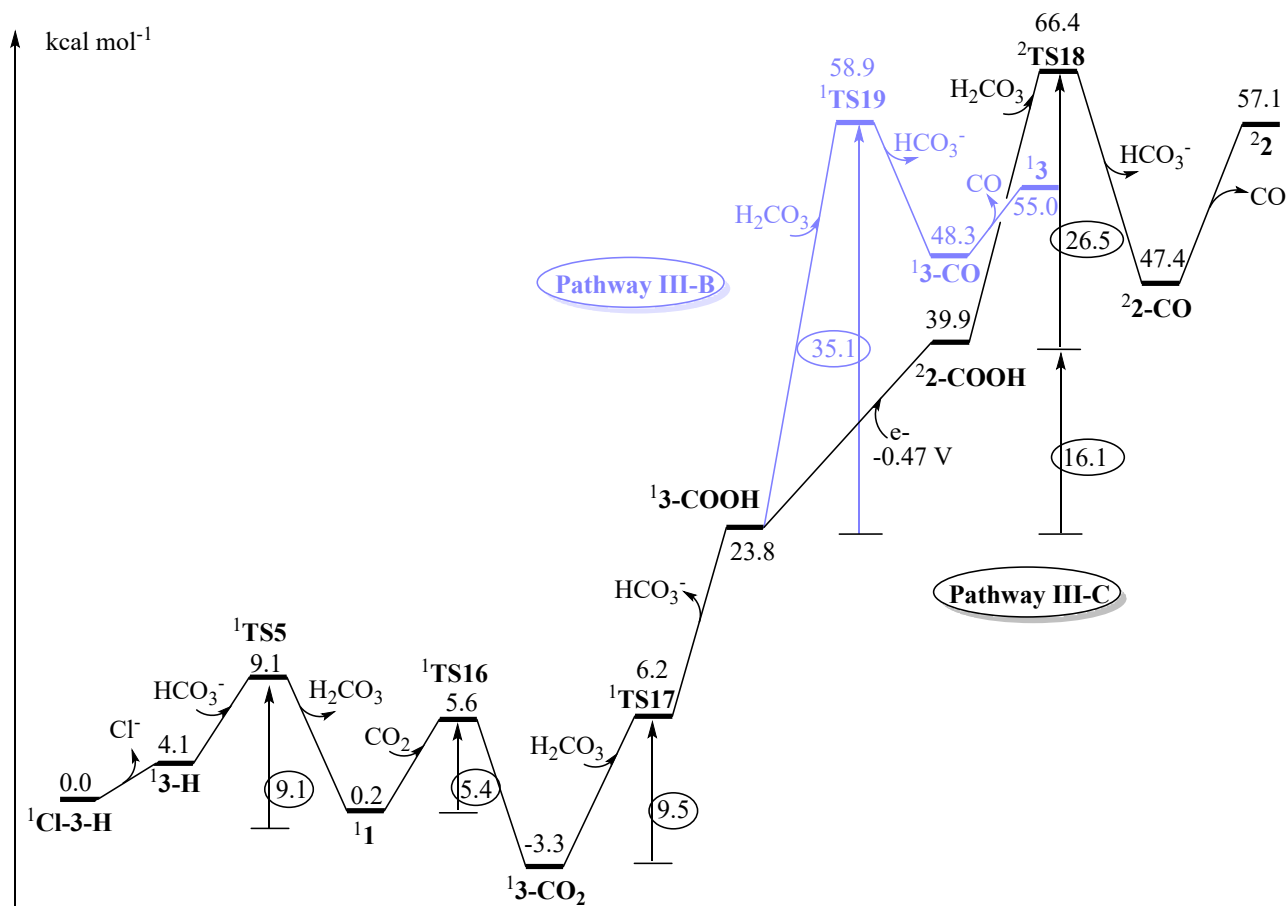

**Figure S15.** Gibbs free energy diagram (in kcal mol<sup>-1</sup>) for the reduction of CO<sub>2</sub> to CO involving the deprotonation of Cl-3-H in dark.

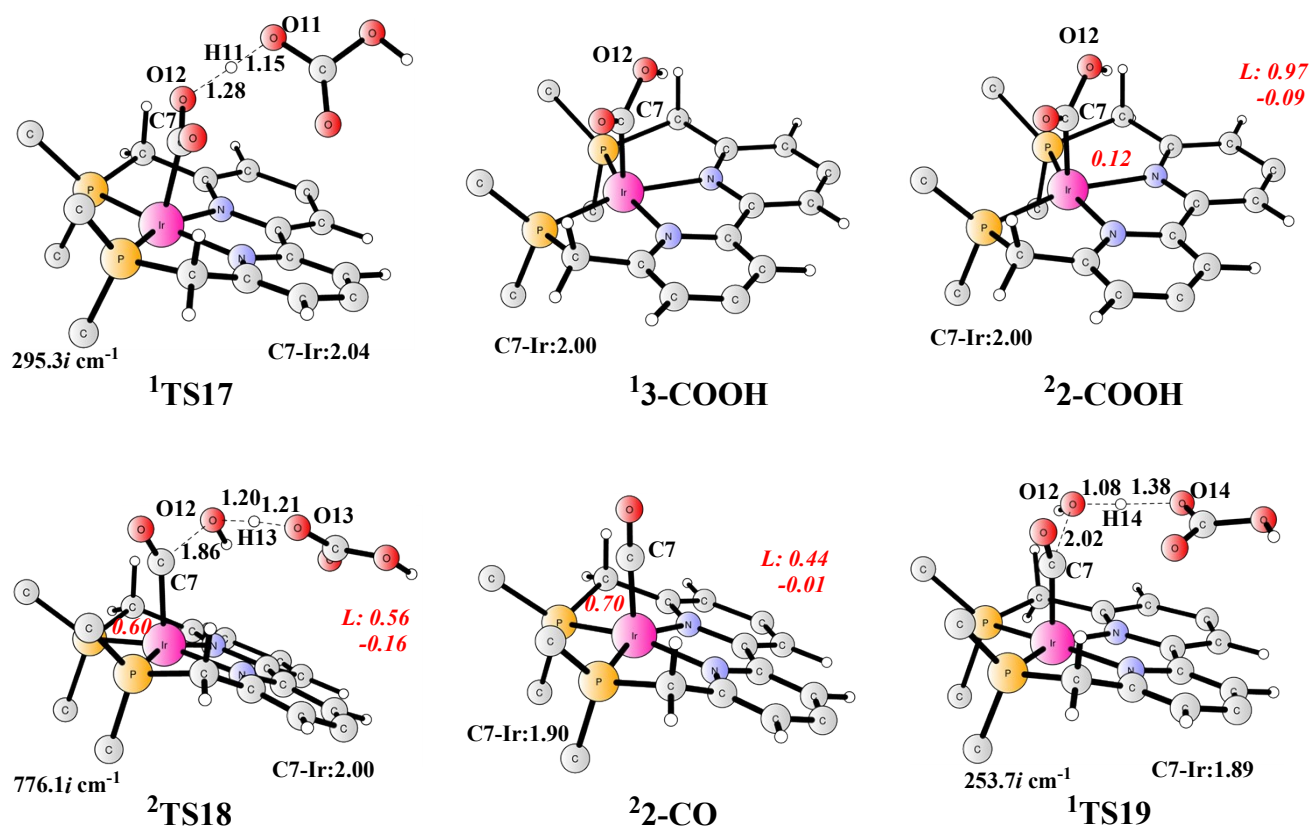

**Figure S16.** The optimized structures of  $^1\text{TS17}$  (total charge of +1),  $^{13}\text{-COOH}$  (total charge of +2),  $^{22}\text{-COOH}$  (total charge of +1),  $^2\text{TS18}$  (total charge of +1),  $^{22}\text{-CO}$  (total charge of +2), and  $^1\text{TS19}$  (total charge of +2). The spin multiplicities of the species are indicated by the numbers in the left superscript. Distances are given in Ångströms. The spin populations of Ir and the ligand are shown in red italic and the imaginary frequencies for all transition states are also shown. For clarity, the four Cy groups are shown with only one C atom, two trimethylphenyl groups and unimportant hydrogen atoms are not shown.

Hydricity,  $\Delta G_{\text{H}^-}^\circ$ , is defined as the heterolytic bond dissociation free energy of the hydride dissociation reaction, namely,  $\text{MH} \rightarrow \text{M}^+ + \text{H}^-$ , which measures the strength of the  $\text{M}^+-\text{H}^-$  interaction in a hydride donor. By definition, a MH complex with a more positive value of hydricity ( $\Delta G_{\text{H}^-}^\circ$ ) corresponds to a lower hydride donating ability (less hydridic).

We have calculated the hydricity ( $\Delta G_{\text{H}^-}^\circ$ )<sup>1-6</sup> of critical intermediates, including  $\text{HCOO}^-$ , BIH, and Ir-H at different oxidation states (including **3-H**, **2-H**, and **1-H**). The results suggest an hydricity order of **3-H** (148.0 kcal mol<sup>-1</sup>) > **2-H** (67.2 kcal mol<sup>-1</sup>) > BIH (53.3 kcal mol<sup>-1</sup>) >  $\text{HCOO}^-$  (52.6 kcal mol<sup>-1</sup>) > **1-H** (34.7 kcal mol<sup>-1</sup>) by using the formula developed by Muckerman<sup>1</sup> et al. The order of hydricity calculated with the method developed by Ye<sup>2</sup> et al is the same as above: **3-H** (124.0 kcal mol<sup>-1</sup>) > **2-H** (50.1 kcal mol<sup>-1</sup>) > BIH (37.4 kcal mol<sup>-1</sup>) >  $\text{HCOO}^-$  (36.7 kcal mol<sup>-1</sup>) > **1-H** (20.4 kcal mol<sup>-1</sup>), albeit with different absolute values. Therefore, these results suggest an order of the hydride donor ability as **3-H** < **2-H** <  $\text{HCOO}^-$  < BIH < **1-H**. Clearly, **3-H** is the most suitable one for  $\text{CO}_2$  reduction to produce formate via direct hydride transfer.

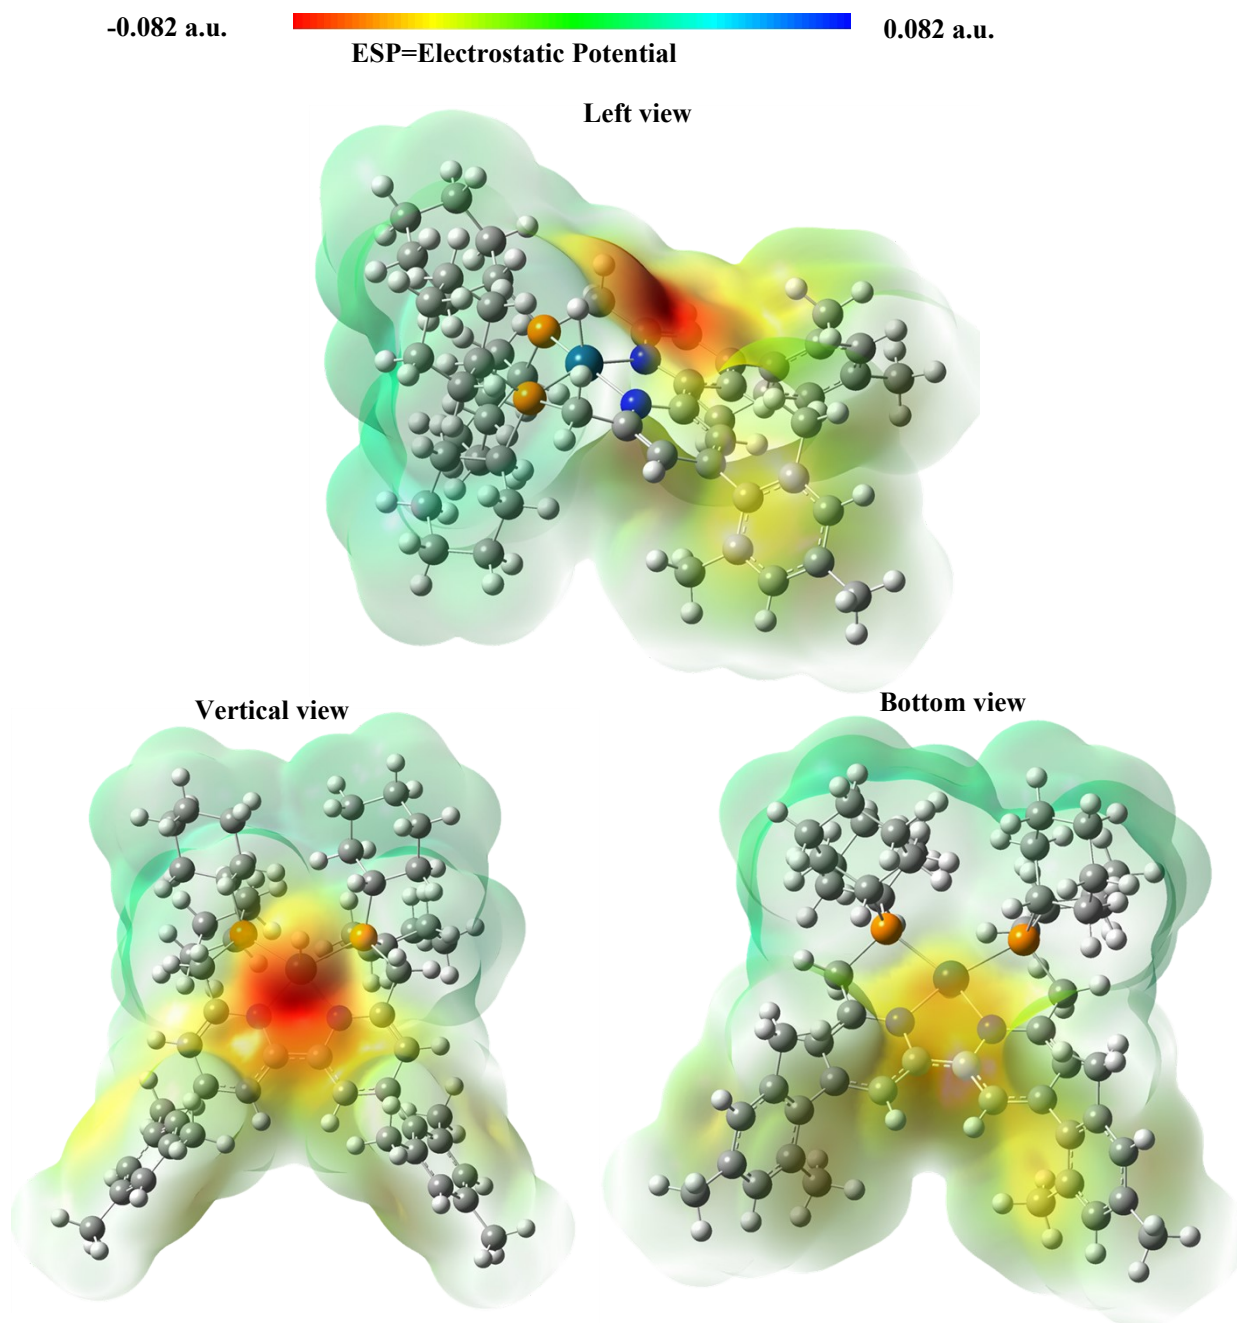

**Figure S17.** Left view (up), vertical view (down left), and bottom view (down right) of electrostatic potential for  $^{11}\text{H}$ . The isosurface plot is depicted at 0.001 au. The electrostatic potential on the hydride (red) is more negative than that on Ir center (yellow).

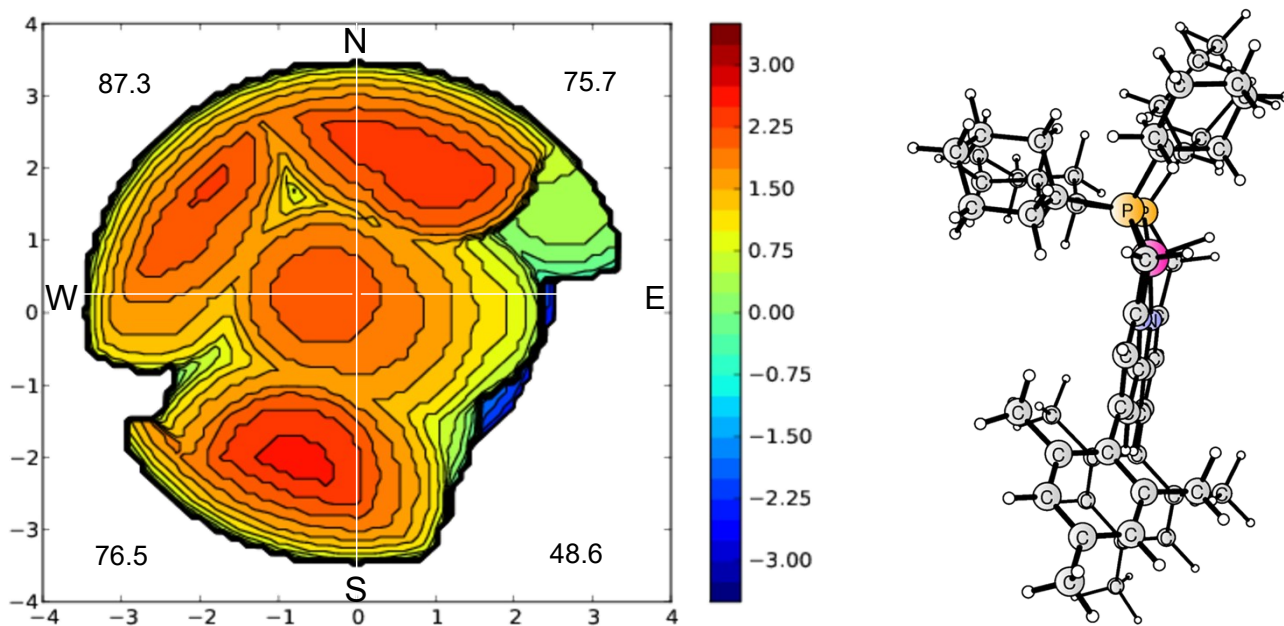

**Figure S18.** The steric contour map analysis for the active species <sup>11</sup>H.

## 9. Energies.

**Table S5.** Table of energies.

| Species                           | Opt (hartree) | Gibbs energy correction (hartree) | Large basis set (hartree) | The lowest frequency (cm <sup>-1</sup> ) |
|-----------------------------------|---------------|-----------------------------------|---------------------------|------------------------------------------|
| <sup>1</sup> Cl-3-H               | -3460.23743   | 1.08434                           | -3460.89946               | 8.8 <i>i</i>                             |
| <sup>3</sup> Cl-3-H               | -3460.13761   | 1.08226                           | -3460.80225               | 11.2 <i>i</i>                            |
| <sup>2</sup> Cl-2-H               | -3460.33292   | 1.07869                           | -3461.00112               | 9.8 <i>i</i>                             |
| <sup>2</sup> 2-H                  | -2999.95635   | 1.08116                           | -3000.58650               | 12.5 <i>i</i>                            |
| <sup>1</sup> 1-H                  | -3000.05209   | 1.07945                           | -3000.68557               | 11.1 <i>i</i>                            |
| <sup>2</sup> Cl-2                 | -3459.60654   | 1.07487                           | -3460.26945               | 12.4 <i>i</i>                            |
| <sup>2</sup> 2                    | -2999.22280   | 1.07525                           | -2999.84863               | 12.0 <i>i</i>                            |
| <sup>2</sup> 2-OCHO               | -3188.54551   | 1.09360                           | -3189.24347               | 11.3 <i>i</i>                            |
| <sup>2</sup> 2(-H)                | -2998.71939   | 1.06192                           | -2999.35067               | 12.0 <i>i</i>                            |
| <sup>1</sup> 1-OCHO               | -3188.66519   | 1.08985                           | -3189.37493               | 13.7 <i>i</i>                            |
| <sup>1</sup> 1                    | -2999.36468   | 1.07405                           | -2999.99219               | 9.8 <i>i</i>                             |
| <sup>1</sup> 3-H                  | -2999.84735   | 1.08530                           | -3000.47308               | 8.2 <i>i</i>                             |
| <sup>1</sup> O <sub>2</sub> C-3-H | -3188.66234   | 1.09221                           | -3189.36305               | 11.9 <i>i</i>                            |
| <sup>1</sup> HOOC-3-H             | -3189.16283   | 1.10673                           | -3189.85775               | 10.7 <i>i</i>                            |
| <sup>3</sup> HOOC-3-H             | -3189.08001   | 1.10249                           | -3189.77762               | 11.0 <i>i</i>                            |
| <sup>2</sup> HOOC-2-H             | -3189.25857   | 1.10045                           | -3189.95948               | 9.2 <i>i</i>                             |
| <sup>2</sup> OC-2-H               | -3113.29416   | 1.08675                           | -3113.96461               | 9.7 <i>i</i>                             |
| <sup>1</sup> H-3-H                | -3000.56804   | 1.09302                           | -3001.19435               | -35.9 <i>i</i>                           |
| <sup>2</sup> TS1                  | -3648.90161   | 1.08506                           | -3649.64101               | -1373.9 <i>i</i>                         |
| <sup>2</sup> TS2                  | -3188.53636   | 1.08598                           | -3189.23830               | -687.1 <i>i</i>                          |
| <sup>2</sup> TS3                  | -3188.51229   | 1.08941                           | -3189.20962               | -141.2 <i>i</i>                          |
| <sup>1</sup> TS4                  | -3188.63894   | 1.08342                           | -3189.34579               | -478.9 <i>i</i>                          |
| <sup>1</sup> TS5                  | -3264.40904   | 1.10569                           | -3265.13961               | -476.2 <i>i</i>                          |
| <sup>1</sup> TS6                  | -3453.72763   | 1.12508                           | -3454.53559               | -5960 <i>i</i>                           |
| <sup>1</sup> TS7                  | -3188.64493   | 1.08721                           | -3189.34903               | -932.6 <i>i</i>                          |
| <sup>1</sup> TS8                  | -3263.89302   | 1.08996                           | -3264.62975               | -962.6 <i>i</i>                          |
| <sup>1</sup> TS9                  | -3265.09025   | 1.10988                           | -3265.82214               | -1385.3 <i>i</i>                         |
| <sup>1</sup> TS10                 | -3189.15692   | 1.099442                          | -3189.85685               | -432.9 <i>i</i>                          |
| <sup>1</sup> TS11                 | -3188.64389   | 1.088745                          | -3189.34813               | -207.6 <i>i</i>                          |
| <sup>1</sup> TS12                 | -3453.71931   | 1.12386                           | -3454.52408               | -321.7 <i>i</i>                          |
| <sup>1</sup> TS13                 | -3454.28413   | 1.13172                           | -3455.09315               | -684.3 <i>i</i>                          |
| <sup>1</sup> TS14                 | -3454.18762   | 1.13867                           | -3454.99029               | -665.7 <i>i</i>                          |

|                         |             |         |             |                 |
|-------------------------|-------------|---------|-------------|-----------------|
| <b><sup>1</sup>TS15</b> | -3377.72450 | 1.11438 | -3378.49545 | -429.9 <i>i</i> |
| <b><sup>1</sup>TS16</b> | -3187.96029 | 1.08429 | -3188.65993 | -165.7 <i>i</i> |
| <b><sup>1</sup>TS17</b> | -3453.02006 | 1.11733 | -3453.82201 | -295.3 <i>i</i> |
| <b><sup>2</sup>TS18</b> | -3453.56827 | 1.12539 | -3454.37044 | -776.1 <i>i</i> |
| <b><sup>1</sup>TS19</b> | -3453.43435 | 1.13932 | -3454.23604 | -253.7 <i>i</i> |
| <b><sup>1</sup>TS20</b> | -3265.07291 | 1.10702 | -3265.80100 | -603.9 <i>i</i> |



## 10. Cartesian coordinates.

<sup>1</sup>Cl-3-H E(opt)= -3460.23743 hartree

---

| Center<br>Number | Atomic<br>Number | Atomic<br>Type | Coordinates (Angstroms) |           |           |
|------------------|------------------|----------------|-------------------------|-----------|-----------|
|                  |                  |                | X                       | Y         | Z         |
| 1                | 77               | 0              | -0.742842               | -0.078179 | -0.274087 |
| 2                | 1                | 0              | -1.013343               | -0.146994 | -1.822842 |
| 3                | 15               | 0              | -1.970034               | -2.034825 | -0.090445 |
| 4                | 15               | 0              | -2.066613               | 1.832845  | -0.216752 |
| 5                | 6                | 0              | 2.106043                | -0.753731 | -0.350669 |
| 6                | 6                | 0              | 0.762427                | -2.700944 | -0.399915 |
| 7                | 6                | 0              | 3.264233                | -1.520304 | -0.284772 |
| 8                | 6                | 0              | 1.899092                | -3.504263 | -0.307559 |
| 9                | 6                | 0              | 3.169273                | -2.919070 | -0.247369 |
| 10               | 1                | 0              | 4.237328                | -1.044949 | -0.258162 |
| 11               | 1                | 0              | 1.790333                | -4.582795 | -0.289510 |
| 12               | 6                | 0              | 2.070406                | 0.726033  | -0.381430 |
| 13               | 6                | 0              | 0.638646                | 2.601734  | -0.551693 |
| 14               | 6                | 0              | 3.187129                | 1.550667  | -0.303971 |
| 15               | 6                | 0              | 1.732022                | 3.463112  | -0.466540 |
| 16               | 6                | 0              | 3.024914                | 2.943167  | -0.332308 |
| 17               | 1                | 0              | 4.177755                | 1.125067  | -0.202023 |
| 18               | 1                | 0              | 1.572428                | 4.534637  | -0.509266 |
| 19               | 6                | 0              | 4.396067                | -3.761784 | -0.149142 |
| 20               | 6                | 0              | 4.826053                | -4.507537 | -1.266456 |
| 21               | 6                | 0              | 5.118422                | -3.803398 | 1.061934  |
| 22               | 6                | 0              | 5.982417                | -5.286921 | -1.150796 |
| 23               | 6                | 0              | 6.264588                | -4.602650 | 1.134647  |

|    |   |   |          |           |           |
|----|---|---|----------|-----------|-----------|
| 24 | 6 | 0 | 6.712508 | -5.352201 | 0.041165  |
| 25 | 1 | 0 | 6.321923 | -5.854425 | -2.014437 |
| 26 | 1 | 0 | 6.820190 | -4.640832 | 2.068993  |
| 27 | 6 | 0 | 4.205620 | 3.847070  | -0.216783 |
| 28 | 6 | 0 | 5.108549 | 3.964772  | -1.293593 |
| 29 | 6 | 0 | 4.413185 | 4.571404  | 0.975930  |
| 30 | 6 | 0 | 6.209308 | 4.818339  | -1.158861 |
| 31 | 6 | 0 | 5.531832 | 5.406393  | 1.069761  |
| 32 | 6 | 0 | 6.438845 | 5.547119  | 0.013255  |
| 33 | 1 | 0 | 6.903940 | 4.915041  | -1.990276 |
| 34 | 1 | 0 | 5.700590 | 5.956711  | 1.992758  |
| 35 | 6 | 0 | 7.934154 | -6.231280 | 0.153877  |
| 36 | 1 | 0 | 7.660146 | -7.238769 | 0.493022  |
| 37 | 1 | 0 | 8.440236 | -6.340344 | -0.810556 |
| 38 | 1 | 0 | 8.651749 | -5.829929 | 0.876456  |
| 39 | 6 | 0 | 4.073260 | -4.459981 | -2.576358 |
| 40 | 1 | 0 | 3.090621 | -4.938427 | -2.493859 |
| 41 | 1 | 0 | 3.897219 | -3.428287 | -2.901363 |
| 42 | 1 | 0 | 4.628965 | -4.974560 | -3.364870 |
| 43 | 6 | 0 | 4.666958 | -3.014595 | 2.269804  |
| 44 | 1 | 0 | 4.776422 | -1.935554 | 2.110534  |
| 45 | 1 | 0 | 3.609887 | -3.195527 | 2.495378  |
| 46 | 1 | 0 | 5.253584 | -3.281942 | 3.152853  |
| 47 | 6 | 0 | 4.898026 | 3.197847  | -2.578889 |
| 48 | 1 | 0 | 5.031634 | 2.119861  | -2.431529 |
| 49 | 1 | 0 | 3.884643 | 3.340960  | -2.970812 |
| 50 | 1 | 0 | 5.607706 | 3.519679  | -3.345770 |
| 51 | 6 | 0 | 3.464303 | 4.441325  | 2.145361  |
| 52 | 1 | 0 | 2.481550 | 4.869627  | 1.916799  |
| 53 | 1 | 0 | 3.297307 | 3.391583  | 2.412395  |

|    |    |   |           |           |           |
|----|----|---|-----------|-----------|-----------|
| 54 | 1  | 0 | 3.856799  | 4.957928  | 3.025370  |
| 55 | 6  | 0 | 7.617181  | 6.483337  | 0.125834  |
| 56 | 1  | 0 | 8.447917  | 6.161148  | -0.509786 |
| 57 | 1  | 0 | 7.341131  | 7.498402  | -0.188093 |
| 58 | 1  | 0 | 7.978198  | 6.550661  | 1.157093  |
| 59 | 7  | 0 | 0.888602  | -1.360263 | -0.398927 |
| 60 | 7  | 0 | 0.828036  | 1.270106  | -0.485175 |
| 61 | 6  | 0 | -0.627656 | -3.254046 | -0.575591 |
| 62 | 6  | 0 | -0.771446 | 3.069042  | -0.788987 |
| 63 | 1  | 0 | -0.764732 | -3.452207 | -1.646090 |
| 64 | 1  | 0 | -0.740873 | -4.209944 | -0.058451 |
| 65 | 1  | 0 | -0.934701 | 4.068189  | -0.383232 |
| 66 | 1  | 0 | -0.908351 | 3.143223  | -1.875182 |
| 67 | 17 | 0 | -0.079297 | 0.015141  | 2.250944  |
| 68 | 6  | 0 | -2.458881 | -2.537475 | 1.629255  |
| 69 | 6  | 0 | -3.304833 | -1.466169 | 2.345671  |
| 70 | 6  | 0 | -3.116141 | -3.924157 | 1.767327  |
| 71 | 1  | 0 | -1.479286 | -2.563167 | 2.127614  |
| 72 | 6  | 0 | -3.489984 | -1.827911 | 3.827132  |
| 73 | 1  | 0 | -4.289458 | -1.391987 | 1.869529  |
| 74 | 1  | 0 | -2.818937 | -0.494162 | 2.257208  |
| 75 | 6  | 0 | -3.285761 | -4.286387 | 3.252406  |
| 76 | 1  | 0 | -4.104617 | -3.901845 | 1.293537  |
| 77 | 1  | 0 | -2.529715 | -4.696045 | 1.256938  |
| 78 | 6  | 0 | -4.105694 | -3.223540 | 3.997315  |
| 79 | 1  | 0 | -4.116083 | -1.070589 | 4.314764  |
| 80 | 1  | 0 | -2.510721 | -1.799235 | 4.325605  |
| 81 | 1  | 0 | -3.764593 | -5.269245 | 3.339704  |
| 82 | 1  | 0 | -2.293089 | -4.373182 | 3.716547  |
| 83 | 1  | 0 | -4.183861 | -3.479623 | 5.060942  |

|     |   |   |           |           |           |
|-----|---|---|-----------|-----------|-----------|
| 84  | 1 | 0 | -5.129834 | -3.216255 | 3.596948  |
| 85  | 6 | 0 | -3.319485 | -2.345348 | -1.327566 |
| 86  | 6 | 0 | -3.644619 | -3.818706 | -1.655861 |
| 87  | 6 | 0 | -4.607161 | -1.573623 | -0.978962 |
| 88  | 1 | 0 | -2.889136 | -1.891058 | -2.231680 |
| 89  | 6 | 0 | -4.650982 | -3.890579 | -2.817365 |
| 90  | 1 | 0 | -4.078328 | -4.309834 | -0.779205 |
| 91  | 1 | 0 | -2.738778 | -4.373428 | -1.920494 |
| 92  | 6 | 0 | -5.610125 | -1.648542 | -2.139668 |
| 93  | 1 | 0 | -5.061311 | -2.017209 | -0.084325 |
| 94  | 1 | 0 | -4.376126 | -0.531625 | -0.739110 |
| 95  | 6 | 0 | -5.931696 | -3.104343 | -2.504546 |
| 96  | 1 | 0 | -4.888344 | -4.939467 | -3.032035 |
| 97  | 1 | 0 | -4.184010 | -3.478150 | -3.723119 |
| 98  | 1 | 0 | -6.525786 | -1.106381 | -1.874252 |
| 99  | 1 | 0 | -5.182127 | -1.142320 | -3.014886 |
| 100 | 1 | 0 | -6.617834 | -3.139765 | -3.359365 |
| 101 | 1 | 0 | -6.450287 | -3.581931 | -1.660921 |
| 102 | 6 | 0 | -2.657708 | 2.341342  | 1.483236  |
| 103 | 6 | 0 | -2.323149 | 3.780508  | 1.921325  |
| 104 | 6 | 0 | -4.154252 | 2.028962  | 1.700490  |
| 105 | 1 | 0 | -2.082034 | 1.669399  | 2.128356  |
| 106 | 6 | 0 | -2.724195 | 3.991972  | 3.391680  |
| 107 | 1 | 0 | -2.849997 | 4.504365  | 1.286695  |
| 108 | 1 | 0 | -1.250445 | 3.973223  | 1.811022  |
| 109 | 6 | 0 | -4.527080 | 2.225878  | 3.177351  |
| 110 | 1 | 0 | -4.767901 | 2.700996  | 1.088261  |
| 111 | 1 | 0 | -4.387193 | 1.006434  | 1.386388  |
| 112 | 6 | 0 | -4.199689 | 3.651758  | 3.642169  |
| 113 | 1 | 0 | -2.514806 | 5.028038  | 3.684198  |

|     |   |   |           |          |           |
|-----|---|---|-----------|----------|-----------|
| 114 | 1 | 0 | -2.094710 | 3.350163 | 4.024381  |
| 115 | 1 | 0 | -5.592615 | 2.010084 | 3.321835  |
| 116 | 1 | 0 | -3.969088 | 1.503089 | 3.789061  |
| 117 | 1 | 0 | -4.440152 | 3.771718 | 4.705488  |
| 118 | 1 | 0 | -4.832948 | 4.362184 | 3.091445  |
| 119 | 6 | 0 | -3.472202 | 2.123131 | -1.400021 |
| 120 | 6 | 0 | -3.836854 | 3.618903 | -1.537358 |
| 121 | 6 | 0 | -3.231660 | 1.483925 | -2.781379 |
| 122 | 1 | 0 | -4.323173 | 1.605950 | -0.941111 |
| 123 | 6 | 0 | -5.054416 | 3.804890 | -2.456105 |
| 124 | 1 | 0 | -2.987161 | 4.164723 | -1.966595 |
| 125 | 1 | 0 | -4.038607 | 4.060148 | -0.557015 |
| 126 | 6 | 0 | -4.443602 | 1.697105 | -3.703001 |
| 127 | 1 | 0 | -2.340713 | 1.928690 | -3.245969 |
| 128 | 1 | 0 | -3.033306 | 0.414296 | -2.668937 |
| 129 | 6 | 0 | -4.809950 | 3.180690 | -3.835459 |
| 130 | 1 | 0 | -5.281774 | 4.873503 | -2.551010 |
| 131 | 1 | 0 | -5.931885 | 3.332054 | -1.992477 |
| 132 | 1 | 0 | -4.236191 | 1.260917 | -4.687736 |
| 133 | 1 | 0 | -5.303547 | 1.153036 | -3.290158 |
| 134 | 1 | 0 | -5.696321 | 3.297808 | -4.470573 |
| 135 | 1 | 0 | -3.988697 | 3.715970 | -4.333434 |

-----  
<sup>3</sup>Cl-3-H E(opt)= -3460.137613 hartree  
 -----

| Center<br>Number | Atomic<br>Number | Atomic<br>Type | Coordinates (Angstroms) |           |           |
|------------------|------------------|----------------|-------------------------|-----------|-----------|
|                  |                  |                | X                       | Y         | Z         |
| 1                | 77               | 0              | -0.716388               | -0.105611 | -0.197211 |
| 2                | 1                | 0              | -1.142856               | -0.329858 | -1.698353 |

|    |    |   |           |           |           |
|----|----|---|-----------|-----------|-----------|
| 3  | 15 | 0 | -1.910717 | -2.167087 | 0.037365  |
| 4  | 15 | 0 | -2.087197 | 1.813594  | -0.330309 |
| 5  | 6  | 0 | 2.139608  | -0.761117 | -0.415046 |
| 6  | 6  | 0 | 0.853068  | -2.753402 | -0.175435 |
| 7  | 6  | 0 | 3.329418  | -1.519152 | -0.343141 |
| 8  | 6  | 0 | 2.006337  | -3.521762 | -0.073833 |
| 9  | 6  | 0 | 3.271901  | -2.891537 | -0.152126 |
| 10 | 1  | 0 | 4.288692  | -1.024209 | -0.441872 |
| 11 | 1  | 0 | 1.930267  | -4.596058 | 0.047249  |
| 12 | 6  | 0 | 2.054195  | 0.655684  | -0.577771 |
| 13 | 6  | 0 | 0.539075  | 2.519082  | -0.947247 |
| 14 | 6  | 0 | 3.117342  | 1.566801  | -0.459060 |
| 15 | 6  | 0 | 1.572519  | 3.405960  | -0.838052 |
| 16 | 6  | 0 | 2.911060  | 2.934118  | -0.565398 |
| 17 | 1  | 0 | 4.107274  | 1.188386  | -0.231210 |
| 18 | 1  | 0 | 1.385317  | 4.464434  | -0.971740 |
| 19 | 6  | 0 | 4.521547  | -3.702055 | -0.047998 |
| 20 | 6  | 0 | 4.966647  | -4.452923 | -1.155354 |
| 21 | 6  | 0 | 5.248145  | -3.713303 | 1.160140  |
| 22 | 6  | 0 | 6.139883  | -5.206126 | -1.034191 |
| 23 | 6  | 0 | 6.414490  | -4.483212 | 1.240381  |
| 24 | 6  | 0 | 6.875874  | -5.237641 | 0.155923  |
| 25 | 1  | 0 | 6.488470  | -5.779225 | -1.890700 |
| 26 | 1  | 0 | 6.975101  | -4.494027 | 2.172633  |
| 27 | 6  | 0 | 4.018493  | 3.904476  | -0.387196 |
| 28 | 6  | 0 | 5.158917  | 3.858114  | -1.226059 |
| 29 | 6  | 0 | 3.937138  | 4.886686  | 0.633162  |
| 30 | 6  | 0 | 6.181551  | 4.794151  | -1.036146 |
| 31 | 6  | 0 | 4.989806  | 5.792333  | 0.791154  |
| 32 | 6  | 0 | 6.118637  | 5.769817  | -0.036224 |

|    |   |   |           |           |           |
|----|---|---|-----------|-----------|-----------|
| 33 | 1 | 0 | 7.049358  | 4.762767  | -1.691522 |
| 34 | 1 | 0 | 4.931593  | 6.530216  | 1.588610  |
| 35 | 6 | 0 | 8.118059  | -6.087174 | 0.275468  |
| 36 | 1 | 0 | 7.867221  | -7.103493 | 0.606267  |
| 37 | 1 | 0 | 8.635700  | -6.178302 | -0.684857 |
| 38 | 1 | 0 | 8.819398  | -5.672082 | 1.006237  |
| 39 | 6 | 0 | 4.204112  | -4.433957 | -2.459695 |
| 40 | 1 | 0 | 3.200189  | -4.858499 | -2.344011 |
| 41 | 1 | 0 | 4.072059  | -3.410029 | -2.828473 |
| 42 | 1 | 0 | 4.726150  | -5.008324 | -3.229839 |
| 43 | 6 | 0 | 4.779200  | -2.914878 | 2.354602  |
| 44 | 1 | 0 | 4.820277  | -1.837302 | 2.158332  |
| 45 | 1 | 0 | 3.738560  | -3.148928 | 2.607502  |
| 46 | 1 | 0 | 5.397222  | -3.120878 | 3.232878  |
| 47 | 6 | 0 | 5.297393  | 2.840667  | -2.337060 |
| 48 | 1 | 0 | 5.618139  | 1.864489  | -1.954641 |
| 49 | 1 | 0 | 4.352360  | 2.680487  | -2.865040 |
| 50 | 1 | 0 | 6.045587  | 3.166507  | -3.065454 |
| 51 | 6 | 0 | 2.765227  | 4.952044  | 1.588107  |
| 52 | 1 | 0 | 1.891363  | 5.428989  | 1.129477  |
| 53 | 1 | 0 | 2.449742  | 3.955640  | 1.914288  |
| 54 | 1 | 0 | 3.026215  | 5.534172  | 2.476531  |
| 55 | 6 | 0 | 7.220906  | 6.785916  | 0.131811  |
| 56 | 1 | 0 | 8.173821  | 6.413144  | -0.256371 |
| 57 | 1 | 0 | 6.986160  | 7.711105  | -0.410742 |
| 58 | 1 | 0 | 7.359012  | 7.055958  | 1.183912  |
| 59 | 7 | 0 | 0.927928  | -1.415476 | -0.302278 |
| 60 | 7 | 0 | 0.750017  | 1.168411  | -0.771218 |
| 61 | 6 | 0 | -0.518561 | -3.373848 | -0.240447 |
| 62 | 6 | 0 | -0.879343 | 2.904168  | -1.248596 |

|    |    |   |           |           |           |
|----|----|---|-----------|-----------|-----------|
| 63 | 1  | 0 | -0.643036 | -3.772647 | -1.253365 |
| 64 | 1  | 0 | -0.604958 | -4.221101 | 0.445172  |
| 65 | 1  | 0 | -1.056630 | 3.964759  | -1.069942 |
| 66 | 1  | 0 | -1.075919 | 2.710912  | -2.310174 |
| 67 | 17 | 0 | -0.133826 | 0.079474  | 2.249823  |
| 68 | 6  | 0 | -2.487534 | -2.453149 | 1.782538  |
| 69 | 6  | 0 | -3.371860 | -1.313303 | 2.326071  |
| 70 | 6  | 0 | -3.150103 | -3.824261 | 2.024601  |
| 71 | 1  | 0 | -1.533968 | -2.422705 | 2.327410  |
| 72 | 6  | 0 | -3.644162 | -1.516960 | 3.824093  |
| 73 | 1  | 0 | -4.325690 | -1.292976 | 1.787601  |
| 74 | 1  | 0 | -2.881447 | -0.352572 | 2.163737  |
| 75 | 6  | 0 | -3.409149 | -4.020510 | 3.528845  |
| 76 | 1  | 0 | -4.105834 | -3.865655 | 1.490103  |
| 77 | 1  | 0 | -2.526984 | -4.639978 | 1.642762  |
| 78 | 6  | 0 | -4.272945 | -2.888977 | 4.102188  |
| 79 | 1  | 0 | -4.296183 | -0.714154 | 4.188979  |
| 80 | 1  | 0 | -2.696155 | -1.432161 | 4.373599  |
| 81 | 1  | 0 | -3.892107 | -4.991714 | 3.690202  |
| 82 | 1  | 0 | -2.446521 | -4.050201 | 4.058135  |
| 83 | 1  | 0 | -4.417798 | -3.031098 | 5.179864  |
| 84 | 1  | 0 | -5.269545 | -2.929073 | 3.639618  |
| 85 | 6  | 0 | -3.202929 | -2.611709 | -1.219234 |
| 86 | 6  | 0 | -3.416732 | -4.125567 | -1.452903 |
| 87 | 6  | 0 | -4.553349 | -1.920380 | -0.939432 |
| 88 | 1  | 0 | -2.780192 | -2.187014 | -2.140805 |
| 89 | 6  | 0 | -4.396254 | -4.348209 | -2.617684 |
| 90 | 1  | 0 | -3.824485 | -4.586903 | -0.547882 |
| 91 | 1  | 0 | -2.472235 | -4.630382 | -1.675497 |
| 92 | 6  | 0 | -5.522658 | -2.145358 | -2.109619 |



|     |   |   |           |           |           |
|-----|---|---|-----------|-----------|-----------|
| 93  | 1 | 0 | -4.990425 | -2.346402 | -0.028973 |
| 94  | 1 | 0 | -4.415017 | -0.851004 | -0.758021 |
| 95  | 6 | 0 | -5.735742 | -3.640776 | -2.376022 |
| 96  | 1 | 0 | -4.549701 | -5.424347 | -2.761116 |
| 97  | 1 | 0 | -3.944686 | -3.964582 | -3.543503 |
| 98  | 1 | 0 | -6.477531 | -1.650842 | -1.895720 |
| 99  | 1 | 0 | -5.113203 | -1.672424 | -3.011258 |
| 100 | 1 | 0 | -6.401311 | -3.783285 | -3.235779 |
| 101 | 1 | 0 | -6.234067 | -4.096369 | -1.508532 |
| 102 | 6 | 0 | -2.483070 | 2.593318  | 1.320610  |
| 103 | 6 | 0 | -2.077860 | 4.075050  | 1.457312  |
| 104 | 6 | 0 | -3.949038 | 2.370970  | 1.754165  |
| 105 | 1 | 0 | -1.850042 | 2.019084  | 2.005113  |
| 106 | 6 | 0 | -2.306903 | 4.556132  | 2.899950  |
| 107 | 1 | 0 | -2.664416 | 4.692292  | 0.765304  |
| 108 | 1 | 0 | -1.022496 | 4.206177  | 1.195540  |
| 109 | 6 | 0 | -4.149012 | 2.845687  | 3.201774  |
| 110 | 1 | 0 | -4.622322 | 2.937085  | 1.099818  |
| 111 | 1 | 0 | -4.225374 | 1.316027  | 1.663358  |
| 112 | 6 | 0 | -3.751203 | 4.319477  | 3.361335  |
| 113 | 1 | 0 | -2.048590 | 5.619127  | 2.976651  |
| 114 | 1 | 0 | -1.621748 | 4.013611  | 3.566723  |
| 115 | 1 | 0 | -5.194536 | 2.695537  | 3.496495  |
| 116 | 1 | 0 | -3.536146 | 2.226823  | 3.872163  |
| 117 | 1 | 0 | -3.872490 | 4.636353  | 4.404179  |
| 118 | 1 | 0 | -4.429233 | 4.941374  | 2.759359  |
| 119 | 6 | 0 | -3.606161 | 1.885154  | -1.395605 |
| 120 | 6 | 0 | -4.031065 | 3.344741  | -1.689397 |
| 121 | 6 | 0 | -3.455090 | 1.094441  | -2.710927 |
| 122 | 1 | 0 | -4.392529 | 1.408055  | -0.797879 |

|     |   |   |           |          |           |
|-----|---|---|-----------|----------|-----------|
| 123 | 6 | 0 | -5.331275 | 3.381780 | -2.507711 |
| 124 | 1 | 0 | -3.239970 | 3.844071 | -2.262724 |
| 125 | 1 | 0 | -4.159575 | 3.909812 | -0.762319 |
| 126 | 6 | 0 | -4.753728 | 1.150281 | -3.531774 |
| 127 | 1 | 0 | -2.636138 | 1.520026 | -3.306091 |
| 128 | 1 | 0 | -3.189559 | 0.055022 | -2.504167 |
| 129 | 6 | 0 | -5.188840 | 2.593157 | -3.814853 |
| 130 | 1 | 0 | -5.602246 | 4.424253 | -2.713135 |
| 131 | 1 | 0 | -6.146672 | 2.951902 | -1.908981 |
| 132 | 1 | 0 | -4.617509 | 0.596472 | -4.468342 |
| 133 | 1 | 0 | -5.549503 | 0.639882 | -2.974052 |
| 134 | 1 | 0 | -6.133395 | 2.602633 | -4.371896 |
| 135 | 1 | 0 | -4.438143 | 3.082265 | -4.451938 |

-----  
<sup>2</sup>Cl-2-H E(opt)= -3460.332922 hartree

| Center<br>Number | Atomic<br>Number | Atomic<br>Type | Coordinates (Angstroms) |           |           |
|------------------|------------------|----------------|-------------------------|-----------|-----------|
|                  |                  |                | X                       | Y         | Z         |
| 1                | 77               | 0              | -0.743347               | -0.074654 | -0.299036 |
| 2                | 1                | 0              | -0.996573               | -0.120874 | -1.847946 |
| 3                | 15               | 0              | -1.956671               | -2.041688 | -0.128864 |
| 4                | 15               | 0              | -2.056633               | 1.842161  | -0.204683 |
| 5                | 6                | 0              | 2.112528                | -0.719271 | -0.380518 |
| 6                | 6                | 0              | 0.767753                | -2.704444 | -0.442614 |
| 7                | 6                | 0              | 3.277838                | -1.527298 | -0.300480 |
| 8                | 6                | 0              | 1.890656                | -3.512574 | -0.346160 |
| 9                | 6                | 0              | 3.178883                | -2.904830 | -0.270471 |
| 10               | 1                | 0              | 4.254168                | -1.056524 | -0.255835 |
| 11               | 1                | 0              | 1.788220                | -4.591754 | -0.346901 |

|    |   |   |          |           |           |
|----|---|---|----------|-----------|-----------|
| 12 | 6 | 0 | 2.076595 | 0.707402  | -0.398271 |
| 13 | 6 | 0 | 0.638190 | 2.620988  | -0.537909 |
| 14 | 6 | 0 | 3.197230 | 1.573934  | -0.307082 |
| 15 | 6 | 0 | 1.717167 | 3.485825  | -0.446925 |
| 16 | 6 | 0 | 3.032162 | 2.945854  | -0.314718 |
| 17 | 1 | 0 | 4.192055 | 1.152729  | -0.211596 |
| 18 | 1 | 0 | 1.561605 | 4.557725  | -0.487439 |
| 19 | 6 | 0 | 4.398942 | -3.761191 | -0.168365 |
| 20 | 6 | 0 | 4.968643 | -4.316235 | -1.332670 |
| 21 | 6 | 0 | 4.973478 | -4.019388 | 1.093091  |
| 22 | 6 | 0 | 6.108877 | -5.119962 | -1.215917 |
| 23 | 6 | 0 | 6.113185 | -4.829208 | 1.168358  |
| 24 | 6 | 0 | 6.694900 | -5.390464 | 0.025923  |
| 25 | 1 | 0 | 6.550721 | -5.542483 | -2.116068 |
| 26 | 1 | 0 | 6.556424 | -5.026626 | 2.142285  |
| 27 | 6 | 0 | 4.205151 | 3.860479  | -0.184429 |
| 28 | 6 | 0 | 5.098655 | 4.029466  | -1.263125 |
| 29 | 6 | 0 | 4.418599 | 4.558251  | 1.024441  |
| 30 | 6 | 0 | 6.190029 | 4.894403  | -1.114509 |
| 31 | 6 | 0 | 5.522853 | 5.411088  | 1.132967  |
| 32 | 6 | 0 | 6.419538 | 5.595333  | 0.074152  |
| 33 | 1 | 0 | 6.876311 | 5.024323  | -1.948821 |
| 34 | 1 | 0 | 5.690210 | 5.939541  | 2.069338  |
| 35 | 6 | 0 | 7.903246 | -6.289525 | 0.133453  |
| 36 | 1 | 0 | 7.603057 | -7.337231 | 0.266183  |
| 37 | 1 | 0 | 8.520719 | -6.241852 | -0.769311 |
| 38 | 1 | 0 | 8.528126 | -6.021074 | 0.991374  |
| 39 | 6 | 0 | 4.367150 | -4.037540 | -2.690395 |
| 40 | 1 | 0 | 3.331130 | -4.390920 | -2.748540 |
| 41 | 1 | 0 | 4.343033 | -2.961808 | -2.900487 |

|    |    |   |           |           |           |
|----|----|---|-----------|-----------|-----------|
| 42 | 1  | 0 | 4.937705  | -4.526975 | -3.484670 |
| 43 | 6  | 0 | 4.370872  | -3.433072 | 2.348810  |
| 44 | 1  | 0 | 4.424486  | -2.338352 | 2.345027  |
| 45 | 1  | 0 | 3.309950  | -3.693671 | 2.440242  |
| 46 | 1  | 0 | 4.888797  | -3.794245 | 3.241824  |
| 47 | 6  | 0 | 4.890153  | 3.298245  | -2.569993 |
| 48 | 1  | 0 | 5.063121  | 2.221521  | -2.461890 |
| 49 | 1  | 0 | 3.863880  | 3.416583  | -2.935391 |
| 50 | 1  | 0 | 5.571780  | 3.670737  | -3.340138 |
| 51 | 6  | 0 | 3.487452  | 4.373589  | 2.200586  |
| 52 | 1  | 0 | 2.478974  | 4.740616  | 1.978531  |
| 53 | 1  | 0 | 3.383371  | 3.313990  | 2.461830  |
| 54 | 1  | 0 | 3.854850  | 4.907881  | 3.081260  |
| 55 | 6  | 0 | 7.583852  | 6.547952  | 0.202111  |
| 56 | 1  | 0 | 8.416207  | 6.254242  | -0.445404 |
| 57 | 1  | 0 | 7.292083  | 7.566608  | -0.085408 |
| 58 | 1  | 0 | 7.951093  | 6.596162  | 1.232446  |
| 59 | 7  | 0 | 0.875933  | -1.358864 | -0.433769 |
| 60 | 7  | 0 | 0.810868  | 1.282725  | -0.485200 |
| 61 | 6  | 0 | -0.624743 | -3.256551 | -0.639073 |
| 62 | 6  | 0 | -0.776212 | 3.089857  | -0.774325 |
| 63 | 1  | 0 | -0.766265 | -3.425770 | -1.713945 |
| 64 | 1  | 0 | -0.744566 | -4.224856 | -0.146268 |
| 65 | 1  | 0 | -0.946069 | 4.086255  | -0.363398 |
| 66 | 1  | 0 | -0.923154 | 3.166235  | -1.859024 |
| 67 | 17 | 0 | -0.083597 | -0.021906 | 2.288347  |
| 68 | 6  | 0 | -2.441727 | -2.574268 | 1.585426  |
| 69 | 6  | 0 | -3.292082 | -1.518537 | 2.319221  |
| 70 | 6  | 0 | -3.084626 | -3.968115 | 1.714092  |
| 71 | 1  | 0 | -1.460361 | -2.595272 | 2.080715  |

|     |   |   |           |           |           |
|-----|---|---|-----------|-----------|-----------|
| 72  | 6 | 0 | -3.469243 | -1.897641 | 3.797390  |
| 73  | 1 | 0 | -4.279719 | -1.444539 | 1.848700  |
| 74  | 1 | 0 | -2.811003 | -0.543159 | 2.239275  |
| 75  | 6 | 0 | -3.244020 | -4.348126 | 3.195920  |
| 76  | 1 | 0 | -4.076170 | -3.952541 | 1.245920  |
| 77  | 1 | 0 | -2.493190 | -4.728774 | 1.192501  |
| 78  | 6 | 0 | -4.071146 | -3.300910 | 3.955221  |
| 79  | 1 | 0 | -4.100410 | -1.151784 | 4.296521  |
| 80  | 1 | 0 | -2.488556 | -1.865642 | 4.292827  |
| 81  | 1 | 0 | -3.712437 | -5.336769 | 3.276549  |
| 82  | 1 | 0 | -2.248426 | -4.429109 | 3.655003  |
| 83  | 1 | 0 | -4.143498 | -3.569045 | 5.016441  |
| 84  | 1 | 0 | -5.096852 | -3.299285 | 3.558447  |
| 85  | 6 | 0 | -3.322662 | -2.343491 | -1.355290 |
| 86  | 6 | 0 | -3.654349 | -3.810919 | -1.701058 |
| 87  | 6 | 0 | -4.607092 | -1.573601 | -0.991328 |
| 88  | 1 | 0 | -2.900628 | -1.879178 | -2.258681 |
| 89  | 6 | 0 | -4.667808 | -3.867712 | -2.857266 |
| 90  | 1 | 0 | -4.083790 | -4.312439 | -0.827929 |
| 91  | 1 | 0 | -2.750892 | -4.364193 | -1.977137 |
| 92  | 6 | 0 | -5.617731 | -1.631219 | -2.146444 |
| 93  | 1 | 0 | -5.057833 | -2.026650 | -0.099481 |
| 94  | 1 | 0 | -4.372374 | -0.534953 | -0.739255 |
| 95  | 6 | 0 | -5.944709 | -3.081715 | -2.528061 |
| 96  | 1 | 0 | -4.909912 | -4.913220 | -3.083693 |
| 97  | 1 | 0 | -4.205253 | -3.445703 | -3.760976 |
| 98  | 1 | 0 | -6.531234 | -1.090846 | -1.869453 |
| 99  | 1 | 0 | -5.194043 | -1.114623 | -3.017878 |
| 100 | 1 | 0 | -6.635988 | -3.105152 | -3.379313 |
| 101 | 1 | 0 | -6.459978 | -3.568330 | -1.687419 |

|     |   |   |           |          |           |
|-----|---|---|-----------|----------|-----------|
| 102 | 6 | 0 | -2.636661 | 2.334572 | 1.506434  |
| 103 | 6 | 0 | -2.309430 | 3.771236 | 1.957940  |
| 104 | 6 | 0 | -4.127025 | 2.007721 | 1.741283  |
| 105 | 1 | 0 | -2.047529 | 1.659981 | 2.137235  |
| 106 | 6 | 0 | -2.692983 | 3.964055 | 3.435537  |
| 107 | 1 | 0 | -2.850363 | 4.498604 | 1.338887  |
| 108 | 1 | 0 | -1.240112 | 3.975057 | 1.835182  |
| 109 | 6 | 0 | -4.484288 | 2.185650 | 3.224442  |
| 110 | 1 | 0 | -4.755117 | 2.680055 | 1.143660  |
| 111 | 1 | 0 | -4.355294 | 0.986310 | 1.419776  |
| 112 | 6 | 0 | -4.162461 | 3.609026 | 3.701068  |
| 113 | 1 | 0 | -2.488370 | 4.998381 | 3.738097  |
| 114 | 1 | 0 | -2.050692 | 3.320177 | 4.053174  |
| 115 | 1 | 0 | -5.546281 | 1.959742 | 3.380627  |
| 116 | 1 | 0 | -3.912827 | 1.461156 | 3.821665  |
| 117 | 1 | 0 | -4.390927 | 3.715734 | 4.768575  |
| 118 | 1 | 0 | -4.808318 | 4.320260 | 3.165992  |
| 119 | 6 | 0 | -3.482534 | 2.151164 | -1.363645 |
| 120 | 6 | 0 | -3.857462 | 3.645700 | -1.476333 |
| 121 | 6 | 0 | -3.257064 | 1.533144 | -2.757411 |
| 122 | 1 | 0 | -4.326969 | 1.622579 | -0.905154 |
| 123 | 6 | 0 | -5.085051 | 3.841269 | -2.379813 |
| 124 | 1 | 0 | -3.014360 | 4.202876 | -1.904289 |
| 125 | 1 | 0 | -4.051667 | 4.070960 | -0.487276 |
| 126 | 6 | 0 | -4.479863 | 1.753212 | -3.662821 |
| 127 | 1 | 0 | -2.373358 | 1.987482 | -3.226765 |
| 128 | 1 | 0 | -3.051649 | 0.462927 | -2.662538 |
| 129 | 6 | 0 | -4.853571 | 3.237126 | -3.770430 |
| 130 | 1 | 0 | -5.317984 | 4.910218 | -2.457887 |
| 131 | 1 | 0 | -5.956285 | 3.358699 | -1.914108 |

|     |   |   |           |          |           |
|-----|---|---|-----------|----------|-----------|
| 132 | 1 | 0 | -4.282509 | 1.331928 | -4.656239 |
| 133 | 1 | 0 | -5.333193 | 1.199775 | -3.248190 |
| 134 | 1 | 0 | -5.747037 | 3.360194 | -4.394626 |
| 135 | 1 | 0 | -4.039437 | 3.782249 | -4.269558 |

-----  
**<sup>2</sup>2-H E(opt)=-2999.95634475 hartree**  
 -----

| Center<br>Number | Atomic<br>Number | Atomic<br>Type | Coordinates (Angstroms) |           |           |
|------------------|------------------|----------------|-------------------------|-----------|-----------|
|                  |                  |                | X                       | Y         | Z         |
| 1                | 77               | 0              | -0.794340               | -0.079026 | -0.396533 |
| 2                | 1                | 0              | -1.117332               | -0.137107 | -1.914557 |
| 3                | 15               | 0              | -1.964461               | -2.061805 | -0.140550 |
| 4                | 15               | 0              | -2.080883               | 1.839269  | -0.212721 |
| 5                | 6                | 0              | 2.065443                | -0.719803 | -0.352992 |
| 6                | 6                | 0              | 0.727257                | -2.708124 | -0.505823 |
| 7                | 6                | 0              | 3.227120                | -1.518750 | -0.261539 |
| 8                | 6                | 0              | 1.850888                | -3.504039 | -0.409098 |
| 9                | 6                | 0              | 3.134194                | -2.900127 | -0.271344 |
| 10               | 1                | 0              | 4.199836                | -1.044803 | -0.186575 |
| 11               | 1                | 0              | 1.755716                | -4.583078 | -0.455088 |
| 12               | 6                | 0              | 2.023361                | 0.716742  | -0.371471 |
| 13               | 6                | 0              | 0.578605                | 2.621616  | -0.592135 |
| 14               | 6                | 0              | 3.133612                | 1.582901  | -0.270662 |
| 15               | 6                | 0              | 1.652099                | 3.482547  | -0.495888 |
| 16               | 6                | 0              | 2.965059                | 2.957046  | -0.311304 |
| 17               | 1                | 0              | 4.127218                | 1.166092  | -0.150813 |
| 18               | 1                | 0              | 1.496295                | 4.552309  | -0.576371 |
| 19               | 6                | 0              | 4.352356                | -3.756286 | -0.156652 |
| 20               | 6                | 0              | 4.924343                | -4.323555 | -1.314056 |

|    |   |   |          |           |           |
|----|---|---|----------|-----------|-----------|
| 21 | 6 | 0 | 4.921487 | -4.002063 | 1.109822  |
| 22 | 6 | 0 | 6.062070 | -5.128558 | -1.184455 |
| 23 | 6 | 0 | 6.058224 | -4.814453 | 1.196990  |
| 24 | 6 | 0 | 6.642229 | -5.388776 | 0.062273  |
| 25 | 1 | 0 | 6.506731 | -5.560242 | -2.078721 |
| 26 | 1 | 0 | 6.496855 | -5.004045 | 2.174453  |
| 27 | 6 | 0 | 4.130203 | 3.878877  | -0.173797 |
| 28 | 6 | 0 | 5.075461 | 3.990444  | -1.215368 |
| 29 | 6 | 0 | 4.284300 | 4.640136  | 1.005826  |
| 30 | 6 | 0 | 6.158954 | 4.863806  | -1.058965 |
| 31 | 6 | 0 | 5.384096 | 5.496819  | 1.123348  |
| 32 | 6 | 0 | 6.331563 | 5.625909  | 0.101079  |
| 33 | 1 | 0 | 6.884408 | 4.951229  | -1.865052 |
| 34 | 1 | 0 | 5.506893 | 6.073421  | 2.037855  |
| 35 | 6 | 0 | 7.846905 | -6.290676 | 0.183367  |
| 36 | 1 | 0 | 7.541786 | -7.335230 | 0.328764  |
| 37 | 1 | 0 | 8.465941 | -6.256830 | -0.718858 |
| 38 | 1 | 0 | 8.470984 | -6.013921 | 1.039176  |
| 39 | 6 | 0 | 4.330606 | -4.056309 | -2.677449 |
| 40 | 1 | 0 | 3.305297 | -4.437305 | -2.749801 |
| 41 | 1 | 0 | 4.281183 | -2.981108 | -2.885586 |
| 42 | 1 | 0 | 4.922802 | -4.529025 | -3.465854 |
| 43 | 6 | 0 | 4.315910 | -3.403803 | 2.358552  |
| 44 | 1 | 0 | 4.383108 | -2.309792 | 2.352273  |
| 45 | 1 | 0 | 3.251662 | -3.652770 | 2.444193  |
| 46 | 1 | 0 | 4.823674 | -3.767516 | 3.256240  |
| 47 | 6 | 0 | 4.932021 | 3.192872  | -2.491874 |
| 48 | 1 | 0 | 5.117015 | 2.125689  | -2.324554 |
| 49 | 1 | 0 | 3.921050 | 3.276375  | -2.905858 |
| 50 | 1 | 0 | 5.640752 | 3.538772  | -3.249672 |



|    |   |   |           |           |           |
|----|---|---|-----------|-----------|-----------|
| 51 | 6 | 0 | 3.295440  | 4.521708  | 2.143068  |
| 52 | 1 | 0 | 2.310828  | 4.914981  | 1.864975  |
| 53 | 1 | 0 | 3.145124  | 3.475633  | 2.433997  |
| 54 | 1 | 0 | 3.640430  | 5.073772  | 3.021755  |
| 55 | 6 | 0 | 7.490294  | 6.583778  | 0.237694  |
| 56 | 1 | 0 | 8.337749  | 6.280630  | -0.385120 |
| 57 | 1 | 0 | 7.201788  | 7.596130  | -0.074068 |
| 58 | 1 | 0 | 7.833460  | 6.651825  | 1.275270  |
| 59 | 7 | 0 | 0.829094  | -1.350844 | -0.431390 |
| 60 | 7 | 0 | 0.753870  | 1.274088  | -0.480141 |
| 61 | 6 | 0 | -0.660751 | -3.246105 | -0.761764 |
| 62 | 6 | 0 | -0.833381 | 3.061807  | -0.884307 |
| 63 | 1 | 0 | -0.808414 | -3.316390 | -1.847413 |
| 64 | 1 | 0 | -0.785292 | -4.250421 | -0.348551 |
| 65 | 1 | 0 | -1.016958 | 4.087007  | -0.559168 |
| 66 | 1 | 0 | -0.980607 | 3.034031  | -1.972105 |
| 67 | 6 | 0 | -2.176236 | -2.578689 | 1.637061  |
| 68 | 6 | 0 | -2.787744 | -1.470831 | 2.515618  |
| 69 | 6 | 0 | -2.898915 | -3.920044 | 1.863653  |
| 70 | 1 | 0 | -1.126369 | -2.701435 | 1.947545  |
| 71 | 6 | 0 | -2.757574 | -1.867679 | 3.999162  |
| 72 | 1 | 0 | -3.825771 | -1.291824 | 2.210359  |
| 73 | 1 | 0 | -2.243633 | -0.533220 | 2.366232  |
| 74 | 6 | 0 | -2.853876 | -4.313511 | 3.349451  |
| 75 | 1 | 0 | -3.946136 | -3.819328 | 1.554030  |
| 76 | 1 | 0 | -2.454424 | -4.711088 | 1.249743  |
| 77 | 6 | 0 | -3.454427 | -3.214438 | 4.237199  |
| 78 | 1 | 0 | -3.228058 | -1.080442 | 4.600768  |
| 79 | 1 | 0 | -1.710919 | -1.937939 | 4.328967  |
| 80 | 1 | 0 | -3.388903 | -5.259456 | 3.496888  |

|     |   |   |           |           |           |
|-----|---|---|-----------|-----------|-----------|
| 81  | 1 | 0 | -1.809362 | -4.489412 | 3.643646  |
| 82  | 1 | 0 | -3.384922 | -3.498032 | 5.294305  |
| 83  | 1 | 0 | -4.524451 | -3.111367 | 4.005944  |
| 84  | 6 | 0 | -3.470847 | -2.381074 | -1.169882 |
| 85  | 6 | 0 | -3.821870 | -3.850814 | -1.477043 |
| 86  | 6 | 0 | -4.692946 | -1.621153 | -0.615870 |
| 87  | 1 | 0 | -3.184171 | -1.904021 | -2.118760 |
| 88  | 6 | 0 | -5.000058 | -3.915947 | -2.464183 |
| 89  | 1 | 0 | -4.099980 | -4.371047 | -0.555074 |
| 90  | 1 | 0 | -2.956557 | -4.375302 | -1.896519 |
| 91  | 6 | 0 | -5.868162 | -1.697695 | -1.601503 |
| 92  | 1 | 0 | -4.992376 | -2.067509 | 0.340782  |
| 93  | 1 | 0 | -4.432346 | -0.576693 | -0.415523 |
| 94  | 6 | 0 | -6.223224 | -3.153628 | -1.934616 |
| 95  | 1 | 0 | -5.257949 | -4.963579 | -2.660703 |
| 96  | 1 | 0 | -4.689007 | -3.479553 | -3.424075 |
| 97  | 1 | 0 | -6.737565 | -1.175468 | -1.183903 |
| 98  | 1 | 0 | -5.593688 | -1.170473 | -2.525269 |
| 99  | 1 | 0 | -7.038365 | -3.187972 | -2.667527 |
| 100 | 1 | 0 | -6.591960 | -3.651527 | -1.026310 |
| 101 | 6 | 0 | -2.402680 | 2.313305  | 1.571732  |
| 102 | 6 | 0 | -2.032819 | 3.755752  | 1.971320  |
| 103 | 6 | 0 | -3.840986 | 1.969077  | 2.011513  |
| 104 | 1 | 0 | -1.721202 | 1.645761  | 2.116558  |
| 105 | 6 | 0 | -2.217768 | 3.954475  | 3.485696  |
| 106 | 1 | 0 | -2.663655 | 4.468579  | 1.425501  |
| 107 | 1 | 0 | -0.993228 | 3.972094  | 1.703430  |
| 108 | 6 | 0 | -4.001009 | 2.156222  | 3.527174  |
| 109 | 1 | 0 | -4.546489 | 2.632323  | 1.495555  |
| 110 | 1 | 0 | -4.097849 | 0.943933  | 1.727565  |

|     |   |   |           |          |           |
|-----|---|---|-----------|----------|-----------|
| 111 | 6 | 0 | -3.634633 | 3.586482 | 3.946964  |
| 112 | 1 | 0 | -1.986133 | 4.993151 | 3.750726  |
| 113 | 1 | 0 | -1.491031 | 3.322488 | 4.016118  |
| 114 | 1 | 0 | -5.030623 | 1.920981 | 3.822537  |
| 115 | 1 | 0 | -3.348626 | 1.442042 | 4.049248  |
| 116 | 1 | 0 | -3.719791 | 3.699217 | 5.034552  |
| 117 | 1 | 0 | -4.353597 | 4.286792 | 3.498158  |
| 118 | 6 | 0 | -3.626542 | 2.162626 | -1.185194 |
| 119 | 6 | 0 | -3.998640 | 3.658207 | -1.271230 |
| 120 | 6 | 0 | -3.562138 | 1.521779 | -2.585987 |
| 121 | 1 | 0 | -4.414079 | 1.645577 | -0.622748 |
| 122 | 6 | 0 | -5.318801 | 3.850749 | -2.034339 |
| 123 | 1 | 0 | -3.202180 | 4.202222 | -1.795402 |
| 124 | 1 | 0 | -4.078841 | 4.091685 | -0.269414 |
| 125 | 6 | 0 | -4.880749 | 1.734720 | -3.345952 |
| 126 | 1 | 0 | -2.737297 | 1.968023 | -3.158822 |
| 127 | 1 | 0 | -3.348747 | 0.451973 | -2.496764 |
| 128 | 6 | 0 | -5.254517 | 3.220473 | -3.431758 |
| 129 | 1 | 0 | -5.550148 | 4.920415 | -2.104981 |
| 130 | 1 | 0 | -6.135000 | 3.385396 | -1.463519 |
| 131 | 1 | 0 | -4.801642 | 1.298833 | -4.349309 |
| 132 | 1 | 0 | -5.682058 | 1.191549 | -2.826379 |
| 133 | 1 | 0 | -6.213804 | 3.342080 | -3.949200 |
| 134 | 1 | 0 | -4.500324 | 3.749871 | -4.031704 |

-----  
**<sup>1</sup>H E(opt)= -3000.05209389 hartree**  
 -----

| Center<br>Number | Atomic<br>Number | Atomic<br>Type | Coordinates (Angstroms) |   |   |
|------------------|------------------|----------------|-------------------------|---|---|
|                  |                  |                | X                       | Y | Z |

-----

|    |    |   |           |           |           |
|----|----|---|-----------|-----------|-----------|
| 1  | 77 | 0 | -0.815870 | -0.066110 | -0.644611 |
| 2  | 1  | 0 | -1.416124 | -0.118936 | -2.140302 |
| 3  | 15 | 0 | -1.943795 | -2.037239 | -0.255311 |
| 4  | 15 | 0 | -2.070500 | 1.819525  | -0.165757 |
| 5  | 6  | 0 | 2.060088  | -0.694873 | -0.571108 |
| 6  | 6  | 0 | 0.711193  | -2.690635 | -0.701765 |
| 7  | 6  | 0 | 3.215139  | -1.513150 | -0.444658 |
| 8  | 6  | 0 | 1.821212  | -3.482807 | -0.574286 |
| 9  | 6  | 0 | 3.120480  | -2.886743 | -0.414105 |
| 10 | 1  | 0 | 4.186253  | -1.038373 | -0.347770 |
| 11 | 1  | 0 | 1.720123  | -4.562033 | -0.615381 |
| 12 | 6  | 0 | 2.019948  | 0.718654  | -0.538144 |
| 13 | 6  | 0 | 0.562075  | 2.639646  | -0.572681 |
| 14 | 6  | 0 | 3.129588  | 1.593555  | -0.393578 |
| 15 | 6  | 0 | 1.628423  | 3.486011  | -0.430978 |
| 16 | 6  | 0 | 2.962417  | 2.958234  | -0.311318 |
| 17 | 1  | 0 | 4.126102  | 1.168899  | -0.330609 |
| 18 | 1  | 0 | 1.466882  | 4.558628  | -0.431242 |
| 19 | 6  | 0 | 4.321093  | -3.748509 | -0.213392 |
| 20 | 6  | 0 | 5.322382  | -3.832317 | -1.205523 |
| 21 | 6  | 0 | 4.460213  | -4.488838 | 0.984198  |
| 22 | 6  | 0 | 6.438149  | -4.650877 | -0.984734 |
| 23 | 6  | 0 | 5.590935  | -5.291917 | 1.166019  |
| 24 | 6  | 0 | 6.591458  | -5.390476 | 0.191774  |
| 25 | 1  | 0 | 7.204391  | -4.714221 | -1.754802 |
| 26 | 1  | 0 | 5.697433  | -5.849442 | 2.094625  |
| 27 | 6  | 0 | 4.117902  | 3.878321  | -0.109845 |
| 28 | 6  | 0 | 5.114975  | 4.012380  | -1.102167 |
| 29 | 6  | 0 | 4.219766  | 4.627735  | 1.086497  |
| 30 | 6  | 0 | 6.186682  | 4.887893  | -0.882608 |

|    |   |   |          |           |           |
|----|---|---|----------|-----------|-----------|
| 31 | 6 | 0 | 5.307546 | 5.488747  | 1.266225  |
| 32 | 6 | 0 | 6.301737 | 5.637184  | 0.292054  |
| 33 | 1 | 0 | 6.948466 | 4.989582  | -1.653073 |
| 34 | 1 | 0 | 5.385215 | 6.052377  | 2.194004  |
| 35 | 6 | 0 | 7.785176 | -6.291250 | 0.399830  |
| 36 | 1 | 0 | 7.541268 | -7.332735 | 0.152451  |
| 37 | 1 | 0 | 8.628233 | -5.994497 | -0.231874 |
| 38 | 1 | 0 | 8.118238 | -6.279440 | 1.443209  |
| 39 | 6 | 0 | 5.210138 | -3.061767 | -2.502079 |
| 40 | 1 | 0 | 4.210180 | -3.153944 | -2.939231 |
| 41 | 1 | 0 | 5.390763 | -1.990852 | -2.354386 |
| 42 | 1 | 0 | 5.939002 | -3.422353 | -3.234004 |
| 43 | 6 | 0 | 3.422554 | -4.400186 | 2.080335  |
| 44 | 1 | 0 | 3.186302 | -3.357567 | 2.321770  |
| 45 | 1 | 0 | 2.479266 | -4.874591 | 1.786239  |
| 46 | 1 | 0 | 3.773101 | -4.891644 | 2.992493  |
| 47 | 6 | 0 | 5.046985 | 3.238658  | -2.400306 |
| 48 | 1 | 0 | 5.318139 | 2.185788  | -2.260798 |
| 49 | 1 | 0 | 4.037089 | 3.249149  | -2.823356 |
| 50 | 1 | 0 | 5.733962 | 3.659992  | -3.140360 |
| 51 | 6 | 0 | 3.190530 | 4.489185  | 2.185791  |
| 52 | 1 | 0 | 2.230795 | 4.937623  | 1.904538  |
| 53 | 1 | 0 | 2.988936 | 3.436372  | 2.413296  |
| 54 | 1 | 0 | 3.530011 | 4.978764  | 3.103185  |
| 55 | 6 | 0 | 7.446939 | 6.599799  | 0.495652  |
| 56 | 1 | 0 | 8.315991 | 6.324810  | -0.110339 |
| 57 | 1 | 0 | 7.159759 | 7.620424  | 0.210411  |
| 58 | 1 | 0 | 7.758492 | 6.635448  | 1.545001  |
| 59 | 7 | 0 | 0.800774 | -1.314272 | -0.638140 |
| 60 | 7 | 0 | 0.725251 | 1.267519  | -0.563308 |

|    |   |   |           |           |           |
|----|---|---|-----------|-----------|-----------|
| 61 | 6 | 0 | -0.679318 | -3.218486 | -0.955641 |
| 62 | 6 | 0 | -0.856363 | 3.096932  | -0.793085 |
| 63 | 1 | 0 | -0.862131 | -3.226651 | -2.039364 |
| 64 | 1 | 0 | -0.799585 | -4.241102 | -0.588986 |
| 65 | 1 | 0 | -1.029033 | 4.100500  | -0.400649 |
| 66 | 1 | 0 | -1.048379 | 3.128063  | -1.874878 |
| 67 | 6 | 0 | -2.077096 | -2.617230 | 1.518914  |
| 68 | 6 | 0 | -2.668979 | -1.557280 | 2.463973  |
| 69 | 6 | 0 | -2.755421 | -3.981739 | 1.743198  |
| 70 | 1 | 0 | -1.011500 | -2.723834 | 1.778189  |
| 71 | 6 | 0 | -2.546537 | -1.996021 | 3.931082  |
| 72 | 1 | 0 | -3.727145 | -1.397761 | 2.221820  |
| 73 | 1 | 0 | -2.156421 | -0.603384 | 2.312146  |
| 74 | 6 | 0 | -2.617153 | -4.422607 | 3.210186  |
| 75 | 1 | 0 | -3.821366 | -3.896984 | 1.498897  |
| 76 | 1 | 0 | -2.331533 | -4.743942 | 1.080060  |
| 77 | 6 | 0 | -3.192645 | -3.368400 | 4.166276  |
| 78 | 1 | 0 | -3.002945 | -1.241336 | 4.583346  |
| 79 | 1 | 0 | -1.481455 | -2.046278 | 4.200214  |
| 80 | 1 | 0 | -3.119629 | -5.386689 | 3.356890  |
| 81 | 1 | 0 | -1.553556 | -4.580295 | 3.439564  |
| 82 | 1 | 0 | -3.055099 | -3.682310 | 5.208265  |
| 83 | 1 | 0 | -4.276802 | -3.288302 | 4.000013  |
| 84 | 6 | 0 | -3.510734 | -2.376126 | -1.198502 |
| 85 | 6 | 0 | -3.884127 | -3.840212 | -1.501945 |
| 86 | 6 | 0 | -4.704976 | -1.614921 | -0.588296 |
| 87 | 1 | 0 | -3.273685 | -1.895425 | -2.158875 |
| 88 | 6 | 0 | -5.097639 | -3.888060 | -2.447158 |
| 89 | 1 | 0 | -4.134404 | -4.368037 | -0.576379 |
| 90 | 1 | 0 | -3.037638 | -4.367864 | -1.955586 |

|     |   |   |           |           |           |
|-----|---|---|-----------|-----------|-----------|
| 91  | 6 | 0 | -5.919371 | -1.671134 | -1.527145 |
| 92  | 1 | 0 | -4.970721 | -2.068477 | 0.375454  |
| 93  | 1 | 0 | -4.429643 | -0.573772 | -0.388055 |
| 94  | 6 | 0 | -6.295235 | -3.120820 | -1.867247 |
| 95  | 1 | 0 | -5.372986 | -4.931308 | -2.644751 |
| 96  | 1 | 0 | -4.817651 | -3.445021 | -3.413630 |
| 97  | 1 | 0 | -6.770390 | -1.152223 | -1.068874 |
| 98  | 1 | 0 | -5.678632 | -1.130061 | -2.453084 |
| 99  | 1 | 0 | -7.135993 | -3.140808 | -2.571457 |
| 100 | 1 | 0 | -6.636396 | -3.626891 | -0.952541 |
| 101 | 6 | 0 | -2.327254 | 2.187360  | 1.665094  |
| 102 | 6 | 0 | -1.898218 | 3.588124  | 2.149407  |
| 103 | 6 | 0 | -3.753571 | 1.854485  | 2.149280  |
| 104 | 1 | 0 | -1.643141 | 1.468569  | 2.134022  |
| 105 | 6 | 0 | -2.009182 | 3.685545  | 3.680981  |
| 106 | 1 | 0 | -2.530077 | 4.357068  | 1.687072  |
| 107 | 1 | 0 | -0.865848 | 3.795494  | 1.848747  |
| 108 | 6 | 0 | -3.841061 | 1.937780  | 3.680242  |
| 109 | 1 | 0 | -4.462972 | 2.571219  | 1.716681  |
| 110 | 1 | 0 | -4.056255 | 0.859726  | 1.806857  |
| 111 | 6 | 0 | -3.414847 | 3.324820  | 4.180778  |
| 112 | 1 | 0 | -1.734357 | 4.696179  | 4.007257  |
| 113 | 1 | 0 | -1.279704 | 2.997772  | 4.132393  |
| 114 | 1 | 0 | -4.862597 | 1.708535  | 4.007770  |
| 115 | 1 | 0 | -3.186136 | 1.173028  | 4.120620  |
| 116 | 1 | 0 | -3.449513 | 3.363725  | 5.276443  |
| 117 | 1 | 0 | -4.131423 | 4.073962  | 3.814070  |
| 118 | 6 | 0 | -3.677451 | 2.263173  | -1.003555 |
| 119 | 6 | 0 | -4.017131 | 3.767430  | -0.944823 |
| 120 | 6 | 0 | -3.755761 | 1.741586  | -2.451173 |

|     |   |   |           |          |           |
|-----|---|---|-----------|----------|-----------|
| 121 | 1 | 0 | -4.436455 | 1.720583 | -0.425671 |
| 122 | 6 | 0 | -5.397758 | 4.045981 | -1.560463 |
| 123 | 1 | 0 | -3.258228 | 4.332486 | -1.501979 |
| 124 | 1 | 0 | -3.991031 | 4.129501 | 0.087264  |
| 125 | 6 | 0 | -5.133422 | 2.032759 | -3.067077 |
| 126 | 1 | 0 | -2.975136 | 2.220002 | -3.059277 |
| 127 | 1 | 0 | -3.557116 | 0.665955 | -2.471004 |
| 128 | 6 | 0 | -5.483885 | 3.525310 | -3.001081 |
| 129 | 1 | 0 | -5.607242 | 5.122271 | -1.528177 |
| 130 | 1 | 0 | -6.168582 | 3.553819 | -0.950060 |
| 131 | 1 | 0 | -5.156252 | 1.678526 | -4.105132 |
| 132 | 1 | 0 | -5.894979 | 1.458387 | -2.520372 |
| 133 | 1 | 0 | -6.485805 | 3.700829 | -3.411701 |
| 134 | 1 | 0 | -4.779986 | 4.089396 | -3.630002 |

-----  
<sup>2</sup>Cl-2 E(opt)= -3459.606539 hartree

| Center<br>Number | Atomic<br>Number | Atomic<br>Type | Coordinates (Angstroms) |           |           |
|------------------|------------------|----------------|-------------------------|-----------|-----------|
|                  |                  |                | X                       | Y         | Z         |
| 1                | 77               | 0              | -0.748825               | -0.040425 | -0.256504 |
| 2                | 15               | 0              | -1.992535               | -1.989815 | -0.114850 |
| 3                | 15               | 0              | -2.053351               | 1.877597  | -0.205719 |
| 4                | 6                | 0              | 2.095783                | -0.748853 | -0.332422 |
| 5                | 6                | 0              | 0.729743                | -2.679468 | -0.446114 |
| 6                | 6                | 0              | 3.244516                | -1.531351 | -0.279093 |
| 7                | 6                | 0              | 1.856346                | -3.498472 | -0.369655 |
| 8                | 6                | 0              | 3.131922                | -2.928718 | -0.283027 |
| 9                | 1                | 0              | 4.223513                | -1.069953 | -0.229517 |
| 10               | 1                | 0              | 1.737028                | -4.576109 | -0.388080 |



|    |   |   |          |           |           |
|----|---|---|----------|-----------|-----------|
| 11 | 6 | 0 | 2.077951 | 0.731679  | -0.326486 |
| 12 | 6 | 0 | 0.671872 | 2.631334  | -0.443519 |
| 13 | 6 | 0 | 3.205511 | 1.538271  | -0.221044 |
| 14 | 6 | 0 | 1.777732 | 3.473733  | -0.331718 |
| 15 | 6 | 0 | 3.063859 | 2.933336  | -0.215991 |
| 16 | 1 | 0 | 4.190002 | 1.096816  | -0.126074 |
| 17 | 1 | 0 | 1.633237 | 4.548269  | -0.342233 |
| 18 | 6 | 0 | 4.349737 | -3.787846 | -0.203259 |
| 19 | 6 | 0 | 4.886046 | -4.351266 | -1.378284 |
| 20 | 6 | 0 | 4.955539 | -4.022005 | 1.047563  |
| 21 | 6 | 0 | 6.032081 | -5.148356 | -1.279847 |
| 22 | 6 | 0 | 6.097937 | -4.828338 | 1.101150  |
| 23 | 6 | 0 | 6.650387 | -5.401455 | -0.050068 |
| 24 | 1 | 0 | 6.452634 | -5.578972 | -2.185945 |
| 25 | 1 | 0 | 6.567278 | -5.012126 | 2.065109  |
| 26 | 6 | 0 | 4.257325 | 3.818886  | -0.089773 |
| 27 | 6 | 0 | 5.157266 | 3.940710  | -1.169008 |
| 28 | 6 | 0 | 4.478495 | 4.525818  | 1.110886  |
| 29 | 6 | 0 | 6.267912 | 4.780348  | -1.028469 |
| 30 | 6 | 0 | 5.606477 | 5.347705  | 1.210140  |
| 31 | 6 | 0 | 6.510172 | 5.492313  | 0.151394  |
| 32 | 1 | 0 | 6.960001 | 4.880006  | -1.861680 |
| 33 | 1 | 0 | 5.785000 | 5.884821  | 2.139074  |
| 34 | 6 | 0 | 7.864656 | -6.293936 | 0.036717  |
| 35 | 1 | 0 | 7.570722 | -7.339815 | 0.194350  |
| 36 | 1 | 0 | 8.455352 | -6.258346 | -0.884135 |
| 37 | 1 | 0 | 8.511956 | -6.009964 | 0.872551  |
| 38 | 6 | 0 | 4.248410 | -4.091039 | -2.722995 |
| 39 | 1 | 0 | 3.229538 | -4.493043 | -2.768339 |
| 40 | 1 | 0 | 4.173189 | -3.016613 | -2.927992 |

|    |    |   |           |           |           |
|----|----|---|-----------|-----------|-----------|
| 41 | 1  | 0 | 4.827629  | -4.550530 | -3.528357 |
| 42 | 6  | 0 | 4.382756  | -3.420682 | 2.309680  |
| 43 | 1  | 0 | 4.413814  | -2.325143 | 2.282046  |
| 44 | 1  | 0 | 3.331838  | -3.702341 | 2.444769  |
| 45 | 1  | 0 | 4.939064  | -3.751118 | 3.190930  |
| 46 | 6  | 0 | 4.933183  | 3.193825  | -2.463941 |
| 47 | 1  | 0 | 5.062884  | 2.113156  | -2.333856 |
| 48 | 1  | 0 | 3.917625  | 3.347389  | -2.846086 |
| 49 | 1  | 0 | 5.638563  | 3.523823  | -3.231379 |
| 50 | 6  | 0 | 3.533313  | 4.391994  | 2.282863  |
| 51 | 1  | 0 | 2.557112  | 4.841232  | 2.066762  |
| 52 | 1  | 0 | 3.349224  | 3.340938  | 2.532687  |
| 53 | 1  | 0 | 3.939011  | 4.886717  | 3.169468  |
| 54 | 6  | 0 | 7.698167  | 6.415629  | 0.269098  |
| 55 | 1  | 0 | 8.525706  | 6.087996  | -0.367971 |
| 56 | 1  | 0 | 7.432828  | 7.434980  | -0.040198 |
| 57 | 1  | 0 | 8.059588  | 6.474237  | 1.300711  |
| 58 | 7  | 0 | 0.870231  | -1.338666 | -0.404868 |
| 59 | 7  | 0 | 0.841003  | 1.293518  | -0.426630 |
| 60 | 6  | 0 | -0.666238 | -3.209341 | -0.650084 |
| 61 | 6  | 0 | -0.730096 | 3.139337  | -0.654921 |
| 62 | 1  | 0 | -0.804044 | -3.359776 | -1.728269 |
| 63 | 1  | 0 | -0.792083 | -4.185578 | -0.175299 |
| 64 | 1  | 0 | -0.880336 | 4.098530  | -0.156796 |
| 65 | 1  | 0 | -0.850151 | 3.326046  | -1.729048 |
| 66 | 17 | 0 | -0.039885 | 0.047161  | 2.360923  |
| 67 | 6  | 0 | -2.441142 | -2.540767 | 1.603842  |
| 68 | 6  | 0 | -3.264116 | -1.489479 | 2.374760  |
| 69 | 6  | 0 | -3.093605 | -3.931234 | 1.722832  |
| 70 | 1  | 0 | -1.447745 | -2.579124 | 2.073887  |

|     |   |   |           |           |           |
|-----|---|---|-----------|-----------|-----------|
| 71  | 6 | 0 | -3.409933 | -1.893755 | 3.849740  |
| 72  | 1 | 0 | -4.261564 | -1.399446 | 1.928935  |
| 73  | 1 | 0 | -2.776627 | -0.516444 | 2.301471  |
| 74  | 6 | 0 | -3.223685 | -4.334723 | 3.201282  |
| 75  | 1 | 0 | -4.094422 | -3.898487 | 1.275887  |
| 76  | 1 | 0 | -2.520107 | -4.688152 | 1.176503  |
| 77  | 6 | 0 | -4.022996 | -3.293105 | 3.996863  |
| 78  | 1 | 0 | -4.021344 | -1.150243 | 4.376015  |
| 79  | 1 | 0 | -2.417626 | -1.880508 | 4.322301  |
| 80  | 1 | 0 | -3.699941 | -5.320036 | 3.274683  |
| 81  | 1 | 0 | -2.218944 | -4.433403 | 3.636303  |
| 82  | 1 | 0 | -4.073970 | -3.579031 | 5.054582  |
| 83  | 1 | 0 | -5.057161 | -3.274176 | 3.623465  |
| 84  | 6 | 0 | -3.375181 | -2.273404 | -1.325539 |
| 85  | 6 | 0 | -3.701299 | -3.736055 | -1.696261 |
| 86  | 6 | 0 | -4.656175 | -1.523411 | -0.909606 |
| 87  | 1 | 0 | -2.977766 | -1.783360 | -2.227162 |
| 88  | 6 | 0 | -4.747565 | -3.775978 | -2.823573 |
| 89  | 1 | 0 | -4.099071 | -4.261567 | -0.822302 |
| 90  | 1 | 0 | -2.800916 | -4.272726 | -2.011901 |
| 91  | 6 | 0 | -5.699998 | -1.566500 | -2.035082 |
| 92  | 1 | 0 | -5.075574 | -1.999192 | -0.014541 |
| 93  | 1 | 0 | -4.424427 | -0.487883 | -0.642596 |
| 94  | 6 | 0 | -6.022273 | -3.011641 | -2.439756 |
| 95  | 1 | 0 | -4.985331 | -4.818625 | -3.066592 |
| 96  | 1 | 0 | -4.315521 | -3.328785 | -3.730248 |
| 97  | 1 | 0 | -6.610073 | -1.043566 | -1.716944 |
| 98  | 1 | 0 | -5.309441 | -1.024740 | -2.907084 |
| 99  | 1 | 0 | -6.737623 | -3.024015 | -3.270966 |
| 100 | 1 | 0 | -6.507609 | -3.522249 | -1.595641 |

|     |   |   |           |          |           |
|-----|---|---|-----------|----------|-----------|
| 101 | 6 | 0 | -2.777271 | 2.342483 | 1.451325  |
| 102 | 6 | 0 | -2.593698 | 3.802139 | 1.908322  |
| 103 | 6 | 0 | -4.256858 | 1.913846 | 1.558748  |
| 104 | 1 | 0 | -2.193489 | 1.711218 | 2.131797  |
| 105 | 6 | 0 | -3.122217 | 3.980172 | 3.342742  |
| 106 | 1 | 0 | -3.126357 | 4.482048 | 1.231483  |
| 107 | 1 | 0 | -1.535109 | 4.081767 | 1.881623  |
| 108 | 6 | 0 | -4.757681 | 2.078102 | 3.000971  |
| 109 | 1 | 0 | -4.870270 | 2.538578 | 0.897411  |
| 110 | 1 | 0 | -4.385172 | 0.878209 | 1.230920  |
| 111 | 6 | 0 | -4.581174 | 3.524837 | 3.482146  |
| 112 | 1 | 0 | -3.017509 | 5.029157 | 3.645257  |
| 113 | 1 | 0 | -2.494771 | 3.389002 | 4.024863  |
| 114 | 1 | 0 | -5.810681 | 1.777865 | 3.063647  |
| 115 | 1 | 0 | -4.192915 | 1.401270 | 3.657417  |
| 116 | 1 | 0 | -4.910954 | 3.624807 | 4.523363  |
| 117 | 1 | 0 | -5.224411 | 4.183296 | 2.880750  |
| 118 | 6 | 0 | -3.350502 | 2.143145 | -1.508519 |
| 119 | 6 | 0 | -3.802282 | 3.609558 | -1.668773 |
| 120 | 6 | 0 | -2.898226 | 1.542274 | -2.855753 |
| 121 | 1 | 0 | -4.210377 | 1.558406 | -1.160515 |
| 122 | 6 | 0 | -4.901082 | 3.728587 | -2.737508 |
| 123 | 1 | 0 | -2.947515 | 4.229520 | -1.968869 |
| 124 | 1 | 0 | -4.165102 | 4.004228 | -0.714759 |
| 125 | 6 | 0 | -3.997607 | 1.684386 | -3.919877 |
| 126 | 1 | 0 | -1.992361 | 2.056258 | -3.205962 |
| 127 | 1 | 0 | -2.634003 | 0.486559 | -2.722061 |
| 128 | 6 | 0 | -4.443436 | 3.143970 | -4.080331 |
| 129 | 1 | 0 | -5.188577 | 4.780425 | -2.854275 |
| 130 | 1 | 0 | -5.795850 | 3.190136 | -2.394021 |

|     |   |   |           |          |           |
|-----|---|---|-----------|----------|-----------|
| 131 | 1 | 0 | -3.640093 | 1.283277 | -4.876043 |
| 132 | 1 | 0 | -4.862644 | 1.076021 | -3.622989 |
| 133 | 1 | 0 | -5.248890 | 3.215603 | -4.821170 |
| 134 | 1 | 0 | -3.603184 | 3.739458 | -4.465591 |

-----  
<sup>2</sup>2 E(opt)= -2999.22279505 hartree  
 -----

| Center<br>Number | Atomic<br>Number | Atomic<br>Type | Coordinates (Angstroms) |           |           |
|------------------|------------------|----------------|-------------------------|-----------|-----------|
|                  |                  |                | X                       | Y         | Z         |
| 1                | 77               | 0              | -0.787990               | -0.058765 | -0.297777 |
| 2                | 15               | 0              | -1.979863               | -2.042188 | -0.081248 |
| 3                | 15               | 0              | -2.096838               | 1.864749  | -0.236720 |
| 4                | 6                | 0              | 2.070336                | -0.736797 | -0.232226 |
| 5                | 6                | 0              | 0.731552                | -2.687100 | -0.422538 |
| 6                | 6                | 0              | 3.227651                | -1.505090 | -0.178853 |
| 7                | 6                | 0              | 1.869641                | -3.490515 | -0.353876 |
| 8                | 6                | 0              | 3.134476                | -2.904671 | -0.228920 |
| 9                | 1                | 0              | 4.200085                | -1.032485 | -0.109821 |
| 10               | 1                | 0              | 1.767935                | -4.568259 | -0.414757 |
| 11               | 6                | 0              | 2.033998                | 0.746868  | -0.236479 |
| 12               | 6                | 0              | 0.610433                | 2.629465  | -0.482522 |
| 13               | 6                | 0              | 3.146663                | 1.571340  | -0.121608 |
| 14               | 6                | 0              | 1.703269                | 3.487883  | -0.365955 |
| 15               | 6                | 0              | 2.988465                | 2.964951  | -0.178188 |
| 16               | 1                | 0              | 4.133671                | 1.147332  | 0.016717  |
| 17               | 1                | 0              | 1.551496                | 4.559106  | -0.435656 |
| 18               | 6                | 0              | 4.363081                | -3.749649 | -0.175789 |
| 19               | 6                | 0              | 4.882936                | -4.297380 | -1.366008 |
| 20               | 6                | 0              | 4.992879                | -3.989739 | 1.061970  |

|    |   |   |          |           |           |
|----|---|---|----------|-----------|-----------|
| 21 | 6 | 0 | 6.037553 | -5.084610 | -1.294928 |
| 22 | 6 | 0 | 6.142392 | -4.787076 | 1.087531  |
| 23 | 6 | 0 | 6.679233 | -5.344471 | -0.078676 |
| 24 | 1 | 0 | 6.446056 | -5.502354 | -2.212404 |
| 25 | 1 | 0 | 6.629440 | -4.976830 | 2.041419  |
| 26 | 6 | 0 | 4.170511 | 3.865856  | -0.055010 |
| 27 | 6 | 0 | 5.092486 | 3.957448  | -1.118325 |
| 28 | 6 | 0 | 4.358496 | 4.615569  | 1.124922  |
| 29 | 6 | 0 | 6.193359 | 4.810538  | -0.982222 |
| 30 | 6 | 0 | 5.478438 | 5.448315  | 1.220993  |
| 31 | 6 | 0 | 6.404628 | 5.563385  | 0.177963  |
| 32 | 1 | 0 | 6.902194 | 4.887968  | -1.803543 |
| 33 | 1 | 0 | 5.632373 | 6.018176  | 2.134615  |
| 34 | 6 | 0 | 7.901717 | -6.227838 | -0.022123 |
| 35 | 1 | 0 | 7.618261 | -7.277400 | 0.129972  |
| 36 | 1 | 0 | 8.475569 | -6.178498 | -0.952893 |
| 37 | 1 | 0 | 8.561294 | -5.947188 | 0.805121  |
| 38 | 6 | 0 | 4.221353 | -4.031423 | -2.698114 |
| 39 | 1 | 0 | 3.213612 | -4.460985 | -2.739216 |
| 40 | 1 | 0 | 4.114712 | -2.956256 | -2.884222 |
| 41 | 1 | 0 | 4.803094 | -4.461694 | -3.517578 |
| 42 | 6 | 0 | 4.435832 | -3.409625 | 2.340956  |
| 43 | 1 | 0 | 4.451464 | -2.313565 | 2.325761  |
| 44 | 1 | 0 | 3.391952 | -3.708822 | 2.492887  |
| 45 | 1 | 0 | 5.013425 | -3.742035 | 3.207543  |
| 46 | 6 | 0 | 4.901383 | 3.165877  | -2.391701 |
| 47 | 1 | 0 | 5.026311 | 2.090281  | -2.221062 |
| 48 | 1 | 0 | 3.896384 | 3.306896  | -2.805459 |
| 49 | 1 | 0 | 5.627023 | 3.468793  | -3.151222 |
| 50 | 6 | 0 | 3.386382 | 4.515425  | 2.277917  |

|    |   |   |           |           |           |
|----|---|---|-----------|-----------|-----------|
| 51 | 1 | 0 | 2.409145  | 4.938798  | 2.018312  |
| 52 | 1 | 0 | 3.213455  | 3.472831  | 2.568351  |
| 53 | 1 | 0 | 3.761458  | 5.053924  | 3.152312  |
| 54 | 6 | 0 | 7.583883  | 6.498142  | 0.291731  |
| 55 | 1 | 0 | 8.417907  | 6.170284  | -0.336512 |
| 56 | 1 | 0 | 7.311231  | 7.511542  | -0.030327 |
| 57 | 1 | 0 | 7.938427  | 6.571746  | 1.324823  |
| 58 | 7 | 0 | 0.853872  | -1.345467 | -0.332901 |
| 59 | 7 | 0 | 0.795112  | 1.295382  | -0.391041 |
| 60 | 6 | 0 | -0.655045 | -3.229243 | -0.668891 |
| 61 | 6 | 0 | -0.789762 | 3.096164  | -0.789128 |
| 62 | 1 | 0 | -0.789690 | -3.338312 | -1.752683 |
| 63 | 1 | 0 | -0.775781 | -4.222085 | -0.227571 |
| 64 | 1 | 0 | -0.968717 | 4.102389  | -0.407195 |
| 65 | 1 | 0 | -0.886159 | 3.151983  | -1.880873 |
| 66 | 6 | 0 | -2.213250 | -2.535553 | 1.697146  |
| 67 | 6 | 0 | -2.846926 | -1.421702 | 2.553485  |
| 68 | 6 | 0 | -2.930607 | -3.879313 | 1.926933  |
| 69 | 1 | 0 | -1.166922 | -2.646422 | 2.023591  |
| 70 | 6 | 0 | -2.827050 | -1.802194 | 4.041556  |
| 71 | 1 | 0 | -3.883846 | -1.260986 | 2.236380  |
| 72 | 1 | 0 | -2.314626 | -0.478064 | 2.398775  |
| 73 | 6 | 0 | -2.899941 | -4.255973 | 3.417427  |
| 74 | 1 | 0 | -3.974184 | -3.787048 | 1.603037  |
| 75 | 1 | 0 | -2.473835 | -4.673975 | 1.326967  |
| 76 | 6 | 0 | -3.516565 | -3.151380 | 4.287048  |
| 77 | 1 | 0 | -3.309704 | -1.011940 | 4.629185  |
| 78 | 1 | 0 | -1.783199 | -1.860634 | 4.382233  |
| 79 | 1 | 0 | -3.431286 | -5.203251 | 3.568323  |
| 80 | 1 | 0 | -1.857777 | -4.422988 | 3.724668  |

|     |   |   |           |           |           |
|-----|---|---|-----------|-----------|-----------|
| 81  | 1 | 0 | -3.454800 | -3.423029 | 5.347652  |
| 82  | 1 | 0 | -4.584913 | -3.058215 | 4.044724  |
| 83  | 6 | 0 | -3.461053 | -2.362546 | -1.142172 |
| 84  | 6 | 0 | -3.806992 | -3.835622 | -1.439956 |
| 85  | 6 | 0 | -4.689105 | -1.595648 | -0.610512 |
| 86  | 1 | 0 | -3.157259 | -1.893049 | -2.090082 |
| 87  | 6 | 0 | -4.975671 | -3.910173 | -2.437508 |
| 88  | 1 | 0 | -4.093247 | -4.346461 | -0.515327 |
| 89  | 1 | 0 | -2.937278 | -4.362907 | -1.846382 |
| 90  | 6 | 0 | -5.854565 | -1.684808 | -1.606322 |
| 91  | 1 | 0 | -4.997707 | -2.030228 | 0.348401  |
| 92  | 1 | 0 | -4.429398 | -0.549101 | -0.420629 |
| 93  | 6 | 0 | -6.204512 | -3.144708 | -1.926356 |
| 94  | 1 | 0 | -5.229814 | -4.960041 | -2.625944 |
| 95  | 1 | 0 | -4.655995 | -3.482687 | -3.398511 |
| 96  | 1 | 0 | -6.727556 | -1.159199 | -1.201089 |
| 97  | 1 | 0 | -5.573336 | -1.167461 | -2.533741 |
| 98  | 1 | 0 | -7.013112 | -3.188188 | -2.665784 |
| 99  | 1 | 0 | -6.579997 | -3.633344 | -1.015891 |
| 100 | 6 | 0 | -2.623460 | 2.340707  | 1.490413  |
| 101 | 6 | 0 | -2.401284 | 3.808940  | 1.902351  |
| 102 | 6 | 0 | -4.077321 | 1.903393  | 1.769233  |
| 103 | 1 | 0 | -1.963004 | 1.724093  | 2.115886  |
| 104 | 6 | 0 | -2.768447 | 4.006391  | 3.383599  |
| 105 | 1 | 0 | -3.014788 | 4.469997  | 1.277761  |
| 106 | 1 | 0 | -1.355645 | 4.096362  | 1.749785  |
| 107 | 6 | 0 | -4.418477 | 2.089128  | 3.254410  |
| 108 | 1 | 0 | -4.759404 | 2.517114  | 1.167353  |
| 109 | 1 | 0 | -4.234257 | 0.862658  | 1.470810  |
| 110 | 6 | 0 | -4.199385 | 3.544104  | 3.691339  |



|     |   |   |           |          |           |
|-----|---|---|-----------|----------|-----------|
| 111 | 1 | 0 | -2.639495 | 5.060992 | 3.654853  |
| 112 | 1 | 0 | -2.063751 | 3.431682 | 4.001594  |
| 113 | 1 | 0 | -5.456480 | 1.785599 | 3.435387  |
| 114 | 1 | 0 | -3.782346 | 1.424729 | 3.856135  |
| 115 | 1 | 0 | -4.411165 | 3.657851 | 4.761274  |
| 116 | 1 | 0 | -4.910460 | 4.189698 | 3.156415  |
| 117 | 6 | 0 | -3.509321 | 2.112169 | -1.403456 |
| 118 | 6 | 0 | -3.947769 | 3.581651 | -1.562587 |
| 119 | 6 | 0 | -3.205651 | 1.460689 | -2.768579 |
| 120 | 1 | 0 | -4.335450 | 1.553435 | -0.946189 |
| 121 | 6 | 0 | -5.153006 | 3.686821 | -2.511006 |
| 122 | 1 | 0 | -3.116428 | 4.169545 | -1.973217 |
| 123 | 1 | 0 | -4.197790 | 4.012303 | -0.587967 |
| 124 | 6 | 0 | -4.413681 | 1.584027 | -3.710120 |
| 125 | 1 | 0 | -2.338901 | 1.954444 | -3.229392 |
| 126 | 1 | 0 | -2.939484 | 0.406246 | -2.628936 |
| 127 | 6 | 0 | -4.854686 | 3.045128 | -3.872872 |
| 128 | 1 | 0 | -5.431915 | 4.739902 | -2.635625 |
| 129 | 1 | 0 | -6.014533 | 3.181073 | -2.052418 |
| 130 | 1 | 0 | -4.168360 | 1.144883 | -4.684528 |
| 131 | 1 | 0 | -5.247448 | 0.999507 | -3.297816 |
| 132 | 1 | 0 | -5.736395 | 3.104590 | -4.522085 |
| 133 | 1 | 0 | -4.054439 | 3.611165 | -4.370935 |

-----  
**<sup>1</sup>2-OCHO E(opt)= -3188.54550755 hartree**  
 -----

| Center<br>Number | Atomic<br>Number | Forces (Hartrees/Bohr) |             |              |
|------------------|------------------|------------------------|-------------|--------------|
|                  |                  | X                      | Y           | Z            |
| 1                | 77               | -0.000992926           | 0.001788960 | -0.002264541 |

|    |    |              |              |              |
|----|----|--------------|--------------|--------------|
| 2  | 1  | -0.000132797 | 0.000532453  | -0.001110431 |
| 3  | 15 | -0.000121331 | -0.001083205 | -0.000460247 |
| 4  | 15 | 0.001207849  | -0.000779337 | 0.002048313  |
| 5  | 6  | -0.000205296 | -0.000373208 | 0.000149813  |
| 6  | 6  | 0.000378980  | 0.001803771  | -0.000716672 |
| 7  | 6  | -0.000026717 | 0.000770065  | -0.000015109 |
| 8  | 6  | 0.000304724  | -0.000484600 | -0.000593454 |
| 9  | 6  | -0.000234065 | -0.000274520 | 0.000000588  |
| 10 | 1  | 0.000152285  | 0.000066259  | -0.000438608 |
| 11 | 1  | -0.000136034 | 0.000048395  | 0.000422901  |
| 12 | 6  | -0.000339602 | 0.000082616  | 0.000028664  |
| 13 | 6  | -0.000414353 | -0.000271970 | -0.000107232 |
| 14 | 6  | 0.000073165  | -0.000303774 | 0.000267132  |
| 15 | 6  | 0.000039767  | 0.000255598  | 0.000150310  |
| 16 | 6  | -0.000166860 | -0.000040438 | -0.000151149 |
| 17 | 1  | -0.000188880 | 0.000008397  | 0.000246588  |
| 18 | 1  | 0.000048386  | 0.000006541  | 0.000067254  |
| 19 | 6  | 0.000046850  | -0.000062153 | 0.000005555  |
| 20 | 6  | -0.000055931 | -0.000167487 | 0.000028730  |
| 21 | 6  | -0.000035816 | 0.000044792  | -0.000046415 |
| 22 | 6  | -0.000031286 | 0.000023040  | -0.000023661 |
| 23 | 6  | -0.000007603 | 0.000016004  | 0.000007511  |
| 24 | 6  | 0.000024923  | 0.000005159  | -0.000025694 |
| 25 | 1  | 0.000019140  | 0.000020083  | 0.000007900  |
| 26 | 1  | -0.000018299 | -0.000006644 | -0.000009301 |
| 27 | 6  | 0.000040689  | -0.000020623 | 0.000317554  |
| 28 | 6  | -0.000046054 | -0.000048928 | 0.000001909  |
| 29 | 6  | 0.000037972  | -0.000021843 | -0.000114643 |
| 30 | 6  | -0.000038320 | -0.000032588 | -0.000095413 |
| 31 | 6  | 0.000015655  | 0.000036084  | -0.000050147 |

|    |   |              |              |              |
|----|---|--------------|--------------|--------------|
| 32 | 6 | -0.000008688 | 0.000078306  | 0.000125433  |
| 33 | 1 | -0.000046537 | -0.000047215 | -0.000000396 |
| 34 | 1 | 0.000039172  | 0.000005389  | 0.000001629  |
| 35 | 6 | 0.000005217  | 0.000008792  | 0.000005852  |
| 36 | 1 | -0.000009504 | 0.000003327  | 0.000010153  |
| 37 | 1 | -0.000008581 | -0.000008301 | -0.000003863 |
| 38 | 1 | -0.000009257 | -0.000010577 | 0.000018860  |
| 39 | 6 | 0.000080231  | 0.000022301  | -0.000021972 |
| 40 | 1 | 0.000026044  | 0.000005330  | -0.000003423 |
| 41 | 1 | -0.000006687 | 0.000003895  | -0.000029983 |
| 42 | 1 | -0.000017922 | -0.000007164 | 0.000009013  |
| 43 | 6 | -0.000031157 | -0.000051570 | 0.000006739  |
| 44 | 1 | 0.000033868  | -0.000006593 | 0.000018915  |
| 45 | 1 | 0.000015200  | 0.000036751  | 0.000037555  |
| 46 | 1 | -0.000008507 | -0.000006734 | 0.000014123  |
| 47 | 6 | 0.000011955  | -0.000072305 | -0.000097845 |
| 48 | 1 | 0.000018587  | 0.000021488  | -0.000078361 |
| 49 | 1 | 0.000013309  | 0.000011577  | -0.000007140 |
| 50 | 1 | 0.000013811  | -0.000004762 | 0.000007632  |
| 51 | 6 | 0.000085563  | -0.000035057 | -0.000036379 |
| 52 | 1 | -0.000035813 | 0.000018263  | -0.000047180 |
| 53 | 1 | -0.000025448 | 0.000000096  | -0.000028293 |
| 54 | 1 | 0.000003664  | -0.000026829 | -0.000009887 |
| 55 | 6 | 0.000004009  | -0.000001323 | 0.000047731  |
| 56 | 1 | -0.000010529 | -0.000013036 | -0.000004986 |
| 57 | 1 | -0.000007960 | -0.000013110 | -0.000000938 |
| 58 | 1 | 0.000018956  | -0.000002425 | -0.000003212 |
| 59 | 7 | 0.000418305  | -0.001609021 | 0.001723528  |
| 60 | 7 | 0.000970887  | -0.000266428 | 0.000220420  |
| 61 | 6 | -0.000346150 | 0.002134247  | -0.000457808 |

|    |   |              |              |              |
|----|---|--------------|--------------|--------------|
| 62 | 6 | 0.000063030  | -0.000181532 | -0.000216937 |
| 63 | 1 | -0.000073800 | -0.002047900 | 0.001362654  |
| 64 | 1 | -0.000093729 | -0.000125167 | 0.000013778  |
| 65 | 1 | -0.000169504 | 0.000302215  | -0.000091350 |
| 66 | 1 | -0.000263093 | -0.000012721 | -0.000039013 |
| 67 | 6 | 0.000424744  | -0.000219180 | -0.000865699 |
| 68 | 6 | 0.000000843  | 0.000246282  | 0.000386025  |
| 69 | 6 | 0.000144480  | -0.000047098 | 0.000376207  |
| 70 | 1 | 0.000074005  | 0.000154059  | 0.000028022  |
| 71 | 6 | -0.000046597 | 0.000113718  | -0.000010019 |
| 72 | 1 | -0.000265345 | -0.000085603 | -0.000340652 |
| 73 | 1 | -0.000064765 | 0.000061890  | 0.000182579  |
| 74 | 6 | 0.000006533  | -0.000092739 | 0.000010224  |
| 75 | 1 | -0.000178461 | 0.000033867  | -0.000301602 |
| 76 | 1 | -0.000024776 | -0.000007174 | 0.000046764  |
| 77 | 6 | -0.000058670 | 0.000025277  | -0.000139430 |
| 78 | 1 | -0.000039221 | -0.000054058 | 0.000090487  |
| 79 | 1 | -0.000015734 | 0.000014750  | -0.000032937 |
| 80 | 1 | -0.000020075 | 0.000067483  | 0.000043694  |
| 81 | 1 | 0.000008326  | -0.000017610 | -0.000012444 |
| 82 | 1 | 0.000026148  | -0.000005490 | 0.000028217  |
| 83 | 1 | 0.000015675  | 0.000001915  | 0.000018458  |
| 84 | 6 | 0.000471853  | 0.000299001  | 0.000929026  |
| 85 | 6 | 0.000269055  | -0.000285464 | -0.000160846 |
| 86 | 6 | 0.000084302  | -0.000149466 | -0.000368118 |
| 87 | 1 | 0.000259898  | 0.000361033  | -0.000515999 |
| 88 | 6 | -0.000073076 | 0.000057245  | -0.000112178 |
| 89 | 1 | 0.000040127  | 0.000054126  | 0.000426997  |
| 90 | 1 | -0.000323209 | -0.000044121 | -0.000010766 |
| 91 | 6 | -0.000195590 | 0.000052815  | -0.000058009 |

|     |   |              |              |              |
|-----|---|--------------|--------------|--------------|
| 92  | 1 | 0.000153193  | -0.000021307 | 0.000279186  |
| 93  | 1 | -0.000038987 | 0.000172665  | -0.000038420 |
| 94  | 6 | 0.000153052  | -0.000014348 | 0.000191952  |
| 95  | 1 | -0.000065572 | 0.000037614  | 0.000034037  |
| 96  | 1 | 0.000039575  | -0.000053584 | 0.000047685  |
| 97  | 1 | -0.000067655 | -0.000058275 | -0.000075053 |
| 98  | 1 | -0.000011396 | -0.000057867 | 0.000084409  |
| 99  | 1 | 0.000034670  | 0.000019222  | -0.000033836 |
| 100 | 1 | -0.000009810 | 0.000029677  | -0.000007514 |
| 101 | 6 | -0.000785463 | 0.000803938  | -0.000114557 |
| 102 | 6 | -0.000161054 | 0.000393680  | -0.000106804 |
| 103 | 6 | -0.000141630 | -0.000110212 | -0.000113473 |
| 104 | 1 | 0.000237759  | -0.000052670 | -0.000146564 |
| 105 | 6 | -0.000170041 | -0.000283545 | -0.000035329 |
| 106 | 1 | 0.000194857  | -0.000017892 | 0.000184202  |
| 107 | 1 | 0.000037205  | -0.000138368 | -0.000131107 |
| 108 | 6 | 0.000076553  | 0.000034120  | 0.000032250  |
| 109 | 1 | -0.000051999 | -0.000264982 | 0.000326795  |
| 110 | 1 | 0.000158801  | -0.000169556 | 0.000019031  |
| 111 | 6 | 0.000155706  | 0.000020370  | 0.000120980  |
| 112 | 1 | 0.000064162  | -0.000038435 | -0.000188345 |
| 113 | 1 | 0.000008077  | 0.000004778  | 0.000063382  |
| 114 | 1 | -0.000000013 | -0.000035362 | -0.000114019 |
| 115 | 1 | 0.000017881  | 0.000026513  | 0.000036589  |
| 116 | 1 | -0.000103438 | -0.000008550 | 0.000008432  |
| 117 | 1 | -0.000014539 | 0.000002678  | -0.000011034 |
| 118 | 6 | 0.000056499  | -0.001490258 | -0.001836962 |
| 119 | 6 | 0.000404268  | 0.000339372  | 0.000131330  |
| 120 | 6 | -0.000267152 | 0.000449439  | 0.001655829  |
| 121 | 1 | -0.000083909 | -0.000424178 | 0.000145304  |

|     |   |              |              |              |
|-----|---|--------------|--------------|--------------|
| 122 | 6 | -0.000010783 | 0.000131318  | -0.000142719 |
| 123 | 1 | 0.000160484  | 0.000009830  | -0.000025545 |
| 124 | 1 | -0.000083268 | 0.000211125  | -0.000459431 |
| 125 | 6 | -0.000131402 | 0.000196400  | 0.000104981  |
| 126 | 1 | 0.000615870  | 0.000404294  | -0.000070274 |
| 127 | 1 | -0.000889642 | -0.000341626 | -0.000196517 |
| 128 | 6 | -0.000020396 | -0.000129976 | 0.000116869  |
| 129 | 1 | 0.000085894  | -0.000045740 | 0.000092676  |
| 130 | 1 | -0.000092943 | 0.000003895  | 0.000094543  |
| 131 | 1 | -0.000011024 | -0.000158333 | -0.000096008 |
| 132 | 1 | 0.000318409  | 0.000185975  | -0.000054445 |
| 133 | 1 | 0.000080182  | -0.000135354 | -0.000112091 |
| 134 | 1 | 0.000031657  | -0.000025118 | -0.000037145 |
| 135 | 6 | 0.001058975  | -0.002366051 | 0.001734357  |
| 136 | 8 | -0.000027042 | 0.002100386  | 0.000859646  |
| 137 | 8 | -0.001272200 | 0.000689734  | -0.001828326 |

-----  
**<sup>2</sup>2(-H) E(opt)= -2998.719393 hartree**  
 -----

| Center<br>Number | Atomic<br>Number | Atomic<br>Type | Coordinates (Angstroms) |           |           |
|------------------|------------------|----------------|-------------------------|-----------|-----------|
|                  |                  |                | X                       | Y         | Z         |
| 1                | 77               | 0              | -0.769817               | -0.097878 | -0.163443 |
| 2                | 15               | 0              | -1.961525               | -2.105180 | 0.010909  |
| 3                | 15               | 0              | -2.059132               | 1.851773  | -0.160988 |
| 4                | 6                | 0              | 2.092519                | -0.794013 | -0.111393 |
| 5                | 6                | 0              | 0.683213                | -2.758323 | -0.153983 |
| 6                | 6                | 0              | 3.248462                | -1.548986 | -0.070152 |
| 7                | 6                | 0              | 1.883133                | -3.552540 | -0.108716 |
| 8                | 6                | 0              | 3.128706                | -2.969980 | -0.061732 |

|    |   |   |          |           |           |
|----|---|---|----------|-----------|-----------|
| 9  | 1 | 0 | 4.226481 | -1.085227 | -0.050972 |
| 10 | 1 | 0 | 1.785598 | -4.633750 | -0.100034 |
| 11 | 6 | 0 | 2.069493 | 0.688931  | -0.156126 |
| 12 | 6 | 0 | 0.664369 | 2.581333  | -0.424875 |
| 13 | 6 | 0 | 3.193574 | 1.508132  | -0.100811 |
| 14 | 6 | 0 | 1.766134 | 3.431761  | -0.366371 |
| 15 | 6 | 0 | 3.050979 | 2.898955  | -0.194949 |
| 16 | 1 | 0 | 4.179233 | 1.075232  | 0.018168  |
| 17 | 1 | 0 | 1.624492 | 4.501293  | -0.474541 |
| 18 | 6 | 0 | 4.363345 | -3.810038 | 0.011449  |
| 19 | 6 | 0 | 4.927257 | -4.340477 | -1.165831 |
| 20 | 6 | 0 | 4.965653 | -4.057105 | 1.262234  |
| 21 | 6 | 0 | 6.087452 | -5.118784 | -1.071257 |
| 22 | 6 | 0 | 6.123798 | -4.841073 | 1.314502  |
| 23 | 6 | 0 | 6.698593 | -5.383752 | 0.159324  |
| 24 | 1 | 0 | 6.524785 | -5.525079 | -1.980877 |
| 25 | 1 | 0 | 6.587876 | -5.032208 | 2.279876  |
| 26 | 6 | 0 | 4.246452 | 3.789486  | -0.139915 |
| 27 | 6 | 0 | 5.138862 | 3.829523  | -1.231518 |
| 28 | 6 | 0 | 4.477865 | 4.582394  | 1.003507  |
| 29 | 6 | 0 | 6.252721 | 4.673769  | -1.160292 |
| 30 | 6 | 0 | 5.609080 | 5.405250  | 1.035457  |
| 31 | 6 | 0 | 6.505902 | 5.468728  | -0.037156 |
| 32 | 1 | 0 | 6.938695 | 4.710313  | -2.003739 |
| 33 | 1 | 0 | 5.795406 | 6.008580  | 1.921266  |
| 34 | 6 | 0 | 7.928366 | -6.255570 | 0.244178  |
| 35 | 1 | 0 | 7.654328 | -7.305350 | 0.412029  |
| 36 | 1 | 0 | 8.513091 | -6.216749 | -0.680370 |
| 37 | 1 | 0 | 8.576592 | -5.954817 | 1.073695  |
| 38 | 6 | 0 | 4.297789 | -4.069769 | -2.512554 |

|    |   |   |           |           |           |
|----|---|---|-----------|-----------|-----------|
| 39 | 1 | 0 | 3.293546  | -4.503752 | -2.578817 |
| 40 | 1 | 0 | 4.187141  | -2.993755 | -2.691276 |
| 41 | 1 | 0 | 4.901744  | -4.488981 | -3.322082 |
| 42 | 6 | 0 | 4.369614  | -3.490522 | 2.529840  |
| 43 | 1 | 0 | 4.341941  | -2.394879 | 2.503817  |
| 44 | 1 | 0 | 3.335301  | -3.827058 | 2.667126  |
| 45 | 1 | 0 | 4.945776  | -3.794225 | 3.408218  |
| 46 | 6 | 0 | 4.903600  | 2.991223  | -2.467251 |
| 47 | 1 | 0 | 5.032170  | 1.922469  | -2.260520 |
| 48 | 1 | 0 | 3.885350  | 3.118989  | -2.851672 |
| 49 | 1 | 0 | 5.603594  | 3.263045  | -3.261912 |
| 50 | 6 | 0 | 3.538329  | 4.538448  | 2.186645  |
| 51 | 1 | 0 | 2.557690  | 4.960244  | 1.937778  |
| 52 | 1 | 0 | 3.364430  | 3.509941  | 2.523078  |
| 53 | 1 | 0 | 3.942735  | 5.107522  | 3.028026  |
| 54 | 6 | 0 | 7.698138  | 6.393168  | 0.004815  |
| 55 | 1 | 0 | 8.516111  | 6.021651  | -0.620386 |
| 56 | 1 | 0 | 7.431953  | 7.391492  | -0.366159 |
| 57 | 1 | 0 | 8.073567  | 6.516888  | 1.025652  |
| 58 | 7 | 0 | 0.860129  | -1.380646 | -0.146026 |
| 59 | 7 | 0 | 0.832210  | 1.248171  | -0.284231 |
| 60 | 6 | 0 | -0.615657 | -3.262679 | -0.193052 |
| 61 | 6 | 0 | -0.730554 | 3.050189  | -0.742930 |
| 62 | 1 | 0 | -0.775931 | -4.335333 | -0.159722 |
| 63 | 1 | 0 | -0.898089 | 4.073136  | -0.403491 |
| 64 | 1 | 0 | -0.822725 | 3.063771  | -1.836470 |
| 65 | 6 | 0 | -2.660883 | -2.436750 | 1.717470  |
| 66 | 6 | 0 | -3.499249 | -1.284197 | 2.298760  |
| 67 | 6 | 0 | -3.389325 | -3.785423 | 1.870329  |
| 68 | 1 | 0 | -1.732596 | -2.489527 | 2.306753  |



|    |   |   |           |           |           |
|----|---|---|-----------|-----------|-----------|
| 69 | 6 | 0 | -3.871159 | -1.555460 | 3.764915  |
| 70 | 1 | 0 | -4.417051 | -1.154640 | 1.713811  |
| 71 | 1 | 0 | -2.935919 | -0.350496 | 2.223573  |
| 72 | 6 | 0 | -3.748391 | -4.048613 | 3.342209  |
| 73 | 1 | 0 | -4.312846 | -3.766529 | 1.279114  |
| 74 | 1 | 0 | -2.771766 | -4.602618 | 1.479520  |
| 75 | 6 | 0 | -4.588050 | -2.903184 | 3.925314  |
| 76 | 1 | 0 | -4.498165 | -0.739128 | 4.144314  |
| 77 | 1 | 0 | -2.954051 | -1.559839 | 4.371707  |
| 78 | 1 | 0 | -4.287209 | -5.000217 | 3.428469  |
| 79 | 1 | 0 | -2.822382 | -4.153357 | 3.925534  |
| 80 | 1 | 0 | -4.811274 | -3.093247 | 4.982255  |
| 81 | 1 | 0 | -5.553132 | -2.862106 | 3.399718  |
| 82 | 6 | 0 | -3.236886 | -2.438201 | -1.306385 |
| 83 | 6 | 0 | -3.484686 | -3.923281 | -1.641518 |
| 84 | 6 | 0 | -4.566697 | -1.699867 | -1.062810 |
| 85 | 1 | 0 | -2.758725 | -1.982686 | -2.187067 |
| 86 | 6 | 0 | -4.419864 | -4.052884 | -2.855389 |
| 87 | 1 | 0 | -3.940800 | -4.429391 | -0.783314 |
| 88 | 1 | 0 | -2.534212 | -4.427533 | -1.846421 |
| 89 | 6 | 0 | -5.492936 | -1.833260 | -2.281361 |
| 90 | 1 | 0 | -5.066007 | -2.132128 | -0.187114 |
| 91 | 1 | 0 | -4.383260 | -0.643908 | -0.837981 |
| 92 | 6 | 0 | -5.742921 | -3.306715 | -2.632058 |
| 93 | 1 | 0 | -4.608912 | -5.112822 | -3.065372 |
| 94 | 1 | 0 | -3.916941 | -3.638556 | -3.741063 |
| 95 | 1 | 0 | -6.441691 | -1.318009 | -2.086869 |
| 96 | 1 | 0 | -5.029037 | -1.330924 | -3.140886 |
| 97 | 1 | 0 | -6.378602 | -3.383900 | -3.522626 |
| 98 | 1 | 0 | -6.291972 | -3.785270 | -1.808230 |

|     |   |   |           |          |           |
|-----|---|---|-----------|----------|-----------|
| 99  | 6 | 0 | -2.629014 | 2.441674 | 1.526596  |
| 100 | 6 | 0 | -2.229219 | 3.881267 | 1.906382  |
| 101 | 6 | 0 | -4.142987 | 2.224195 | 1.741264  |
| 102 | 1 | 0 | -2.095491 | 1.765148 | 2.207935  |
| 103 | 6 | 0 | -2.637064 | 4.189477 | 3.357194  |
| 104 | 1 | 0 | -2.716357 | 4.592705 | 1.226981  |
| 105 | 1 | 0 | -1.148051 | 4.020476 | 1.800705  |
| 106 | 6 | 0 | -4.526748 | 2.513585 | 3.200104  |
| 107 | 1 | 0 | -4.703699 | 2.902953 | 1.087356  |
| 108 | 1 | 0 | -4.435114 | 1.206043 | 1.469270  |
| 109 | 6 | 0 | -4.131562 | 3.941242 | 3.600879  |
| 110 | 1 | 0 | -2.376078 | 5.226983 | 3.598396  |
| 111 | 1 | 0 | -2.050698 | 3.549853 | 4.032312  |
| 112 | 1 | 0 | -5.604276 | 2.360737 | 3.335100  |
| 113 | 1 | 0 | -4.018178 | 1.793741 | 3.856835  |
| 114 | 1 | 0 | -4.379773 | 4.126278 | 4.652959  |
| 115 | 1 | 0 | -4.718127 | 4.655658 | 3.005663  |
| 116 | 6 | 0 | -3.435935 | 2.130943 | -1.373096 |
| 117 | 6 | 0 | -3.791160 | 3.613798 | -1.608075 |
| 118 | 6 | 0 | -3.137933 | 1.416166 | -2.707305 |
| 119 | 1 | 0 | -4.302782 | 1.634467 | -0.918722 |
| 120 | 6 | 0 | -4.977237 | 3.741174 | -2.577654 |
| 121 | 1 | 0 | -2.924921 | 4.132115 | -2.039126 |
| 122 | 1 | 0 | -4.022132 | 4.110848 | -0.660650 |
| 123 | 6 | 0 | -4.322358 | 1.557529 | -3.676293 |
| 124 | 1 | 0 | -2.242156 | 1.854780 | -3.168924 |
| 125 | 1 | 0 | -2.919841 | 0.357914 | -2.526063 |
| 126 | 6 | 0 | -4.691250 | 3.029382 | -3.907175 |
| 127 | 1 | 0 | -5.200561 | 4.800898 | -2.750266 |
| 128 | 1 | 0 | -5.870180 | 3.298904 | -2.113408 |

|     |   |   |           |          |           |
|-----|---|---|-----------|----------|-----------|
| 129 | 1 | 0 | -4.083006 | 1.066698 | -4.627457 |
| 130 | 1 | 0 | -5.189757 | 1.030664 | -3.256667 |
| 131 | 1 | 0 | -5.559699 | 3.102814 | -4.572873 |
| 132 | 1 | 0 | -3.858053 | 3.536156 | -4.415032 |

-----  
**<sup>1</sup>1-OCHO E(opt)= -3188.66519242 hartree**  
 -----

| Center<br>Number | Atomic<br>Number | Atomic<br>Type | Coordinates (Angstroms) |           |           |
|------------------|------------------|----------------|-------------------------|-----------|-----------|
|                  |                  |                | X                       | Y         | Z         |
| 1                | 77               | 0              | -0.735106               | 0.012713  | -0.187726 |
| 2                | 1                | 0              | -2.475642               | -1.404402 | -4.271840 |
| 3                | 15               | 0              | -1.930396               | -1.887001 | 0.265498  |
| 4                | 15               | 0              | -1.994205               | 1.916848  | -0.182557 |
| 5                | 6                | 0              | 2.102636                | -0.705548 | -0.170558 |
| 6                | 6                | 0              | 0.718450                | -2.631726 | -0.164399 |
| 7                | 6                | 0              | 3.247707                | -1.492592 | -0.099952 |
| 8                | 6                | 0              | 1.844548                | -3.450067 | -0.074599 |
| 9                | 6                | 0              | 3.126346                | -2.887400 | -0.041208 |
| 10               | 1                | 0              | 4.230246                | -1.035235 | -0.099197 |
| 11               | 1                | 0              | 1.719832                | -4.527325 | -0.049995 |
| 12               | 6                | 0              | 2.087286                | 0.768482  | -0.262027 |
| 13               | 6                | 0              | 0.681617                | 2.648495  | -0.576569 |
| 14               | 6                | 0              | 3.208796                | 1.588650  | -0.181471 |
| 15               | 6                | 0              | 1.779635                | 3.500361  | -0.490561 |
| 16               | 6                | 0              | 3.063290                | 2.978696  | -0.276575 |
| 17               | 1                | 0              | 4.190515                | 1.157934  | -0.024273 |
| 18               | 1                | 0              | 1.634491                | 4.570129  | -0.594589 |
| 19               | 6                | 0              | 4.340033                | -3.753176 | 0.033173  |
| 20               | 6                | 0              | 4.888487                | -4.287113 | -1.150048 |

|    |   |   |          |           |           |
|----|---|---|----------|-----------|-----------|
| 21 | 6 | 0 | 4.930130 | -4.024336 | 1.283384  |
| 22 | 6 | 0 | 6.029235 | -5.092875 | -1.060003 |
| 23 | 6 | 0 | 6.069238 | -4.836205 | 1.329479  |
| 24 | 6 | 0 | 6.632270 | -5.381288 | 0.169775  |
| 25 | 1 | 0 | 6.457672 | -5.502498 | -1.972224 |
| 26 | 1 | 0 | 6.527366 | -5.046614 | 2.293482  |
| 27 | 6 | 0 | 4.244308 | 3.880441  | -0.143119 |
| 28 | 6 | 0 | 5.177255 | 3.981525  | -1.195337 |
| 29 | 6 | 0 | 4.422068 | 4.621928  | 1.043922  |
| 30 | 6 | 0 | 6.277117 | 4.833760  | -1.042714 |
| 31 | 6 | 0 | 5.539305 | 5.456551  | 1.157036  |
| 32 | 6 | 0 | 6.475898 | 5.579614  | 0.124301  |
| 33 | 1 | 0 | 6.995186 | 4.916070  | -1.855703 |
| 34 | 1 | 0 | 5.683231 | 6.020931  | 2.075858  |
| 35 | 6 | 0 | 7.841553 | -6.281798 | 0.245897  |
| 36 | 1 | 0 | 7.541361 | -7.332133 | 0.354805  |
| 37 | 1 | 0 | 8.451425 | -6.211825 | -0.660474 |
| 38 | 1 | 0 | 8.472660 | -6.034167 | 1.105357  |
| 39 | 6 | 0 | 4.263781 | -3.988429 | -2.492698 |
| 40 | 1 | 0 | 3.233670 | -4.359701 | -2.546276 |
| 41 | 1 | 0 | 4.217395 | -2.909146 | -2.679983 |
| 42 | 1 | 0 | 4.832642 | -4.450332 | -3.304141 |
| 43 | 6 | 0 | 4.344226 | -3.450504 | 2.552086  |
| 44 | 1 | 0 | 4.355701 | -2.354230 | 2.537475  |
| 45 | 1 | 0 | 3.297735 | -3.751884 | 2.679484  |
| 46 | 1 | 0 | 4.902998 | -3.783005 | 3.431109  |
| 47 | 6 | 0 | 4.996935 | 3.195454  | -2.473374 |
| 48 | 1 | 0 | 5.095849 | 2.117542  | -2.300778 |
| 49 | 1 | 0 | 4.002256 | 3.355460  | -2.904941 |
| 50 | 1 | 0 | 5.742225 | 3.484551  | -3.219328 |

|    |   |   |           |           |           |
|----|---|---|-----------|-----------|-----------|
| 51 | 6 | 0 | 3.439486  | 4.510802  | 2.187217  |
| 52 | 1 | 0 | 2.459725  | 4.921951  | 1.917700  |
| 53 | 1 | 0 | 3.274715  | 3.465851  | 2.474186  |
| 54 | 1 | 0 | 3.799189  | 5.052447  | 3.066301  |
| 55 | 6 | 0 | 7.653005  | 6.515130  | 0.256760  |
| 56 | 1 | 0 | 8.497119  | 6.188103  | -0.358436 |
| 57 | 1 | 0 | 7.385747  | 7.528951  | -0.068676 |
| 58 | 1 | 0 | 7.991714  | 6.588049  | 1.295297  |
| 59 | 7 | 0 | 0.865156  | -1.283282 | -0.183290 |
| 60 | 7 | 0 | 0.843852  | 1.310420  | -0.424549 |
| 61 | 6 | 0 | -0.682097 | -3.151519 | -0.324655 |
| 62 | 6 | 0 | -0.717964 | 3.110595  | -0.882324 |
| 63 | 1 | 0 | -0.886200 | -3.244533 | -1.407195 |
| 64 | 1 | 0 | -0.803560 | -4.132724 | 0.142462  |
| 65 | 1 | 0 | -0.874233 | 4.149086  | -0.586175 |
| 66 | 1 | 0 | -0.854849 | 3.063619  | -1.970355 |
| 67 | 6 | 0 | -2.074042 | -2.270867 | 2.089241  |
| 68 | 6 | 0 | -2.675860 | -1.109777 | 2.904181  |
| 69 | 6 | 0 | -2.763884 | -3.599588 | 2.450349  |
| 70 | 1 | 0 | -1.012661 | -2.352265 | 2.372135  |
| 71 | 6 | 0 | -2.581238 | -1.386917 | 4.412211  |
| 72 | 1 | 0 | -3.728833 | -0.974576 | 2.627582  |
| 73 | 1 | 0 | -2.157433 | -0.178529 | 2.657170  |
| 74 | 6 | 0 | -2.652036 | -3.877427 | 3.958704  |
| 75 | 1 | 0 | -3.825012 | -3.537668 | 2.179635  |
| 76 | 1 | 0 | -2.334152 | -4.431566 | 1.881336  |
| 77 | 6 | 0 | -3.238684 | -2.723333 | 4.783855  |
| 78 | 1 | 0 | -3.044719 | -0.563709 | 4.970154  |
| 79 | 1 | 0 | -1.521281 | -1.411787 | 4.704491  |
| 80 | 1 | 0 | -3.161090 | -4.818306 | 4.201577  |

|     |   |   |           |           |           |
|-----|---|---|-----------|-----------|-----------|
| 81  | 1 | 0 | -1.592975 | -4.011722 | 4.221928  |
| 82  | 1 | 0 | -3.120979 | -2.922269 | 5.856132  |
| 83  | 1 | 0 | -4.319259 | -2.658229 | 4.590262  |
| 84  | 6 | 0 | -3.490497 | -2.293447 | -0.653169 |
| 85  | 6 | 0 | -3.860857 | -3.780226 | -0.816269 |
| 86  | 6 | 0 | -4.690011 | -1.475788 | -0.139358 |
| 87  | 1 | 0 | -3.230043 | -1.932545 | -1.655713 |
| 88  | 6 | 0 | -5.050376 | -3.914010 | -1.781751 |
| 89  | 1 | 0 | -4.132220 | -4.216095 | 0.151136  |
| 90  | 1 | 0 | -3.007163 | -4.341018 | -1.206443 |
| 91  | 6 | 0 | -5.881924 | -1.617212 | -1.098521 |
| 92  | 1 | 0 | -4.981358 | -1.834605 | 0.856746  |
| 93  | 1 | 0 | -4.415829 | -0.421110 | -0.031455 |
| 94  | 6 | 0 | -6.258188 | -3.091065 | -1.309913 |
| 95  | 1 | 0 | -5.328060 | -4.970304 | -1.887756 |
| 96  | 1 | 0 | -4.732659 | -3.565825 | -2.774082 |
| 97  | 1 | 0 | -6.741447 | -1.052774 | -0.715684 |
| 98  | 1 | 0 | -5.612620 | -1.170544 | -2.065685 |
| 99  | 1 | 0 | -7.080795 | -3.173489 | -2.031156 |
| 100 | 1 | 0 | -6.627278 | -3.506575 | -0.360802 |
| 101 | 6 | 0 | -2.449291 | 2.564113  | 1.522455  |
| 102 | 6 | 0 | -2.177421 | 4.053981  | 1.806828  |
| 103 | 6 | 0 | -3.896798 | 2.187338  | 1.900631  |
| 104 | 1 | 0 | -1.778300 | 1.986808  | 2.171676  |
| 105 | 6 | 0 | -2.477828 | 4.381944  | 3.280252  |
| 106 | 1 | 0 | -2.798457 | 4.682085  | 1.155933  |
| 107 | 1 | 0 | -1.132219 | 4.300971  | 1.591859  |
| 108 | 6 | 0 | -4.174063 | 2.504729  | 3.377166  |
| 109 | 1 | 0 | -4.596252 | 2.760045  | 1.278376  |
| 110 | 1 | 0 | -4.083336 | 1.127989  | 1.699993  |

|     |   |   |           |           |           |
|-----|---|---|-----------|-----------|-----------|
| 111 | 6 | 0 | -3.905233 | 3.985146  | 3.680711  |
| 112 | 1 | 0 | -2.312538 | 5.451134  | 3.461033  |
| 113 | 1 | 0 | -1.762848 | 3.839246  | 3.915320  |
| 114 | 1 | 0 | -5.210189 | 2.243762  | 3.625121  |
| 115 | 1 | 0 | -3.527895 | 1.877885  | 4.008079  |
| 116 | 1 | 0 | -4.072610 | 4.194526  | 4.744324  |
| 117 | 1 | 0 | -4.622112 | 4.601700  | 3.119481  |
| 118 | 6 | 0 | -3.475838 | 2.158277  | -1.281130 |
| 119 | 6 | 0 | -3.883860 | 3.626354  | -1.511830 |
| 120 | 6 | 0 | -3.281811 | 1.415724  | -2.618263 |
| 121 | 1 | 0 | -4.290927 | 1.655804  | -0.744747 |
| 122 | 6 | 0 | -5.141681 | 3.714055  | -2.392269 |
| 123 | 1 | 0 | -3.062509 | 4.159697  | -2.008890 |
| 124 | 1 | 0 | -4.061585 | 4.130215  | -0.556527 |
| 125 | 6 | 0 | -4.540058 | 1.516901  | -3.493109 |
| 126 | 1 | 0 | -2.430965 | 1.850181  | -3.161534 |
| 127 | 1 | 0 | -3.031062 | 0.366767  | -2.430064 |
| 128 | 6 | 0 | -4.948829 | 2.977950  | -3.725284 |
| 129 | 1 | 0 | -5.397896 | 4.766016  | -2.568304 |
| 130 | 1 | 0 | -5.988370 | 3.266908  | -1.851766 |
| 131 | 1 | 0 | -4.367630 | 1.008337  | -4.449642 |
| 132 | 1 | 0 | -5.364297 | 0.986433  | -2.995819 |
| 133 | 1 | 0 | -5.866909 | 3.027336  | -4.323550 |
| 134 | 1 | 0 | -4.164063 | 3.484308  | -4.305836 |
| 135 | 6 | 0 | -1.533547 | -1.844442 | -3.819950 |
| 136 | 8 | 0 | -0.495522 | -1.156698 | -3.957059 |
| 137 | 8 | 0 | -1.689797 | -2.967064 | -3.266558 |

---

**<sup>11</sup> E(opt) = -2999.36468051 hartree**

---

| Center<br>Number | Atomic<br>Number | Atomic<br>Type | Coordinates (Angstroms) |           |           |
|------------------|------------------|----------------|-------------------------|-----------|-----------|
|                  |                  |                | X                       | Y         | Z         |
| 1                | 77               | 0              | -0.777259               | -0.050981 | -0.324968 |
| 2                | 15               | 0              | -1.964844               | -1.993279 | -0.131862 |
| 3                | 15               | 0              | -2.066689               | 1.834489  | -0.189734 |
| 4                | 6                | 0              | 2.066974                | -0.731356 | -0.308255 |
| 5                | 6                | 0              | 0.719404                | -2.669276 | -0.505757 |
| 6                | 6                | 0              | 3.219518                | -1.507874 | -0.239070 |
| 7                | 6                | 0              | 1.850072                | -3.478867 | -0.418847 |
| 8                | 6                | 0              | 3.120313                | -2.904971 | -0.277326 |
| 9                | 1                | 0              | 4.192557                | -1.038446 | -0.154007 |
| 10               | 1                | 0              | 1.739647                | -4.556555 | -0.470774 |
| 11               | 6                | 0              | 2.035512                | 0.745374  | -0.294841 |
| 12               | 6                | 0              | 0.611577                | 2.628291  | -0.476658 |
| 13               | 6                | 0              | 3.151669                | 1.567760  | -0.181501 |
| 14               | 6                | 0              | 1.705651                | 3.482489  | -0.359746 |
| 15               | 6                | 0              | 2.996900                | 2.960410  | -0.204619 |
| 16               | 1                | 0              | 4.139134                | 1.137010  | -0.067683 |
| 17               | 1                | 0              | 1.550897                | 4.554986  | -0.403060 |
| 18               | 6                | 0              | 4.340163                | -3.758904 | -0.176399 |
| 19               | 6                | 0              | 4.894702                | -4.329995 | -1.339618 |
| 20               | 6                | 0              | 4.930456                | -3.984330 | 1.083925  |
| 21               | 6                | 0              | 6.040906                | -5.124111 | -1.220111 |
| 22               | 6                | 0              | 6.073444                | -4.788178 | 1.158899  |
| 23               | 6                | 0              | 6.642749                | -5.368233 | 0.019507  |
| 24               | 1                | 0              | 6.474917                | -5.559635 | -2.117505 |
| 25               | 1                | 0              | 6.529478                | -4.965186 | 2.130534  |
| 26               | 6                | 0              | 4.178676                | 3.861846  | -0.079518 |
| 27               | 6                | 0              | 5.094653                | 3.969454  | -1.146975 |



|    |   |   |          |           |           |
|----|---|---|----------|-----------|-----------|
| 28 | 6 | 0 | 4.374213 | 4.599814  | 1.107008  |
| 29 | 6 | 0 | 6.194517 | 4.823801  | -1.008734 |
| 30 | 6 | 0 | 5.491902 | 5.435773  | 1.205089  |
| 31 | 6 | 0 | 6.411172 | 5.565193  | 0.157792  |
| 32 | 1 | 0 | 6.898175 | 4.912023  | -1.833555 |
| 33 | 1 | 0 | 5.649827 | 5.996475  | 2.123802  |
| 34 | 6 | 0 | 7.856755 | -6.258549 | 0.129144  |
| 35 | 1 | 0 | 7.562035 | -7.303434 | 0.291954  |
| 36 | 1 | 0 | 8.458997 | -6.230098 | -0.784444 |
| 37 | 1 | 0 | 8.493234 | -5.966868 | 0.970650  |
| 38 | 6 | 0 | 4.277189 | -4.080417 | -2.695823 |
| 39 | 1 | 0 | 3.265589 | -4.497797 | -2.759473 |
| 40 | 1 | 0 | 4.189279 | -3.007526 | -2.903180 |
| 41 | 1 | 0 | 4.877591 | -4.532019 | -3.490135 |
| 42 | 6 | 0 | 4.340088 | -3.378400 | 2.335964  |
| 43 | 1 | 0 | 4.381722 | -2.283255 | 2.310492  |
| 44 | 1 | 0 | 3.284537 | -3.650977 | 2.452064  |
| 45 | 1 | 0 | 4.877626 | -3.714462 | 3.226756  |
| 46 | 6 | 0 | 4.898753 | 3.192242  | -2.428640 |
| 47 | 1 | 0 | 5.036811 | 2.116005  | -2.273453 |
| 48 | 1 | 0 | 3.887811 | 3.326935  | -2.829573 |
| 49 | 1 | 0 | 5.612936 | 3.512850  | -3.191950 |
| 50 | 6 | 0 | 3.411335 | 4.484650  | 2.266546  |
| 51 | 1 | 0 | 2.432956 | 4.914185  | 2.022073  |
| 52 | 1 | 0 | 3.237331 | 3.438206  | 2.541770  |
| 53 | 1 | 0 | 3.795109 | 5.008616  | 3.146137  |
| 54 | 6 | 0 | 7.587973 | 6.503117  | 0.273221  |
| 55 | 1 | 0 | 8.424179 | 6.176886  | -0.353121 |
| 56 | 1 | 0 | 7.314042 | 7.515741  | -0.050376 |
| 57 | 1 | 0 | 7.940601 | 6.578364  | 1.306870  |

|    |   |   |           |           |           |
|----|---|---|-----------|-----------|-----------|
| 58 | 7 | 0 | 0.839354  | -1.321423 | -0.417983 |
| 59 | 7 | 0 | 0.786431  | 1.285423  | -0.416897 |
| 60 | 6 | 0 | -0.668821 | -3.201878 | -0.752044 |
| 61 | 6 | 0 | -0.792064 | 3.104750  | -0.739298 |
| 62 | 1 | 0 | -0.815884 | -3.284498 | -1.836448 |
| 63 | 1 | 0 | -0.790974 | -4.203277 | -0.330696 |
| 64 | 1 | 0 | -0.960801 | 4.101055  | -0.327375 |
| 65 | 1 | 0 | -0.918243 | 3.186145  | -1.826347 |
| 66 | 6 | 0 | -2.206013 | -2.567439 | 1.631324  |
| 67 | 6 | 0 | -2.837253 | -1.488141 | 2.532054  |
| 68 | 6 | 0 | -2.919717 | -3.918925 | 1.820687  |
| 69 | 1 | 0 | -1.159946 | -2.688940 | 1.954307  |
| 70 | 6 | 0 | -2.813583 | -1.919106 | 4.006219  |
| 71 | 1 | 0 | -3.875609 | -1.315253 | 2.224327  |
| 72 | 1 | 0 | -2.303016 | -0.541613 | 2.405063  |
| 73 | 6 | 0 | -2.882357 | -4.349090 | 3.296893  |
| 74 | 1 | 0 | -3.965801 | -3.819899 | 1.506447  |
| 75 | 1 | 0 | -2.466030 | -4.693032 | 1.191782  |
| 76 | 6 | 0 | -3.498440 | -3.277904 | 4.207878  |
| 77 | 1 | 0 | -3.296081 | -1.151197 | 4.623527  |
| 78 | 1 | 0 | -1.768611 | -1.986718 | 4.342182  |
| 79 | 1 | 0 | -3.409874 | -5.303161 | 3.417747  |
| 80 | 1 | 0 | -1.838398 | -4.523238 | 3.594482  |
| 81 | 1 | 0 | -3.432708 | -3.586977 | 5.258197  |
| 82 | 1 | 0 | -4.568109 | -3.179462 | 3.972663  |
| 83 | 6 | 0 | -3.465820 | -2.325209 | -1.178494 |
| 84 | 6 | 0 | -3.800867 | -3.792628 | -1.513673 |
| 85 | 6 | 0 | -4.700768 | -1.589719 | -0.620230 |
| 86 | 1 | 0 | -3.182788 | -1.829853 | -2.119286 |
| 87 | 6 | 0 | -4.973771 | -3.855005 | -2.507472 |

|     |   |   |           |           |           |
|-----|---|---|-----------|-----------|-----------|
| 88  | 1 | 0 | -4.077750 | -4.332428 | -0.602790 |
| 89  | 1 | 0 | -2.928748 | -4.301531 | -1.938232 |
| 90  | 6 | 0 | -5.872325 | -1.663033 | -1.610506 |
| 91  | 1 | 0 | -4.999756 | -2.054476 | 0.327843  |
| 92  | 1 | 0 | -4.454005 | -0.545705 | -0.400808 |
| 93  | 6 | 0 | -6.208479 | -3.117071 | -1.970306 |
| 94  | 1 | 0 | -5.218446 | -4.902034 | -2.723939 |
| 95  | 1 | 0 | -4.664217 | -3.397865 | -3.458230 |
| 96  | 1 | 0 | -6.749623 | -1.159025 | -1.186735 |
| 97  | 1 | 0 | -5.602241 | -1.116621 | -2.524713 |
| 98  | 1 | 0 | -7.020701 | -3.149178 | -2.706670 |
| 99  | 1 | 0 | -6.574240 | -3.634935 | -1.071919 |
| 100 | 6 | 0 | -2.589606 | 2.311558  | 1.550498  |
| 101 | 6 | 0 | -2.361727 | 3.773805  | 1.979554  |
| 102 | 6 | 0 | -4.040634 | 1.874426  | 1.841988  |
| 103 | 1 | 0 | -1.927940 | 1.688640  | 2.166635  |
| 104 | 6 | 0 | -2.714665 | 3.957295  | 3.466316  |
| 105 | 1 | 0 | -2.977855 | 4.445855  | 1.369128  |
| 106 | 1 | 0 | -1.316783 | 4.061536  | 1.821454  |
| 107 | 6 | 0 | -4.368362 | 2.043909  | 3.332333  |
| 108 | 1 | 0 | -4.731547 | 2.493241  | 1.255332  |
| 109 | 1 | 0 | -4.200922 | 0.836414  | 1.534897  |
| 110 | 6 | 0 | -4.143464 | 3.493982  | 3.782713  |
| 111 | 1 | 0 | -2.581598 | 5.008676  | 3.749069  |
| 112 | 1 | 0 | -2.005759 | 3.374506  | 4.071911  |
| 113 | 1 | 0 | -5.405013 | 1.739613  | 3.521510  |
| 114 | 1 | 0 | -3.726811 | 1.373036  | 3.921210  |
| 115 | 1 | 0 | -4.346177 | 3.597695  | 4.855627  |
| 116 | 1 | 0 | -4.858453 | 4.145926  | 3.260450  |
| 117 | 6 | 0 | -3.513803 | 2.148066  | -1.314577 |

|     |   |   |           |          |           |
|-----|---|---|-----------|----------|-----------|
| 118 | 6 | 0 | -3.947111 | 3.623791 | -1.416849 |
| 119 | 6 | 0 | -3.262123 | 1.543253 | -2.711141 |
| 120 | 1 | 0 | -4.334759 | 1.581632 | -0.856939 |
| 121 | 6 | 0 | -5.181313 | 3.771361 | -2.321918 |
| 122 | 1 | 0 | -3.124169 | 4.218541 | -1.835064 |
| 123 | 1 | 0 | -4.163073 | 4.028940 | -0.423561 |
| 124 | 6 | 0 | -4.498722 | 1.702693 | -3.609005 |
| 125 | 1 | 0 | -2.407687 | 2.047914 | -3.183690 |
| 126 | 1 | 0 | -2.991713 | 0.485745 | -2.615156 |
| 127 | 6 | 0 | -4.934945 | 3.170709 | -3.712441 |
| 128 | 1 | 0 | -5.455073 | 4.830263 | -2.404357 |
| 129 | 1 | 0 | -6.032759 | 3.258641 | -1.851842 |
| 130 | 1 | 0 | -4.289781 | 1.292633 | -4.604705 |
| 131 | 1 | 0 | -5.323368 | 1.110660 | -3.188176 |
| 132 | 1 | 0 | -5.837399 | 3.257135 | -4.329789 |
| 133 | 1 | 0 | -4.147243 | 3.746618 | -4.219435 |

-----  
**<sup>13</sup>H E(opt) = -2999.847354 hartree**  
 -----

| Center<br>Number | Atomic<br>Number | Atomic<br>Type | Coordinates (Angstroms) |           |           |
|------------------|------------------|----------------|-------------------------|-----------|-----------|
|                  |                  |                | X                       | Y         | Z         |
| 1                | 77               | 0              | -0.792715               | -0.085891 | -0.272959 |
| 2                | 1                | 0              | -0.949305               | -0.172421 | -1.802310 |
| 3                | 15               | 0              | -1.970321               | -2.074274 | -0.068830 |
| 4                | 15               | 0              | -2.105429               | 1.830449  | -0.264410 |
| 5                | 6                | 0              | 2.063790                | -0.741237 | -0.202813 |
| 6                | 6                | 0              | 0.742137                | -2.702281 | -0.390117 |
| 7                | 6                | 0              | 3.227261                | -1.498870 | -0.148461 |
| 8                | 6                | 0              | 1.886314                | -3.495425 | -0.317123 |

|    |   |   |          |           |           |
|----|---|---|----------|-----------|-----------|
| 9  | 6 | 0 | 3.147913 | -2.900287 | -0.193888 |
| 10 | 1 | 0 | 4.194887 | -1.015773 | -0.088032 |
| 11 | 1 | 0 | 1.791376 | -4.573824 | -0.371681 |
| 12 | 6 | 0 | 2.014415 | 0.741172  | -0.228440 |
| 13 | 6 | 0 | 0.580633 | 2.602883  | -0.550637 |
| 14 | 6 | 0 | 3.120023 | 1.576763  | -0.136774 |
| 15 | 6 | 0 | 1.666423 | 3.472633  | -0.462967 |
| 16 | 6 | 0 | 2.953942 | 2.966935  | -0.243051 |
| 17 | 1 | 0 | 4.108439 | 1.162851  | 0.019313  |
| 18 | 1 | 0 | 1.507600 | 4.538124  | -0.583481 |
| 19 | 6 | 0 | 4.382322 | -3.734151 | -0.140584 |
| 20 | 6 | 0 | 4.784351 | -4.461701 | -1.281486 |
| 21 | 6 | 0 | 5.141743 | -3.788400 | 1.047947  |
| 22 | 6 | 0 | 5.947771 | -5.235546 | -1.209881 |
| 23 | 6 | 0 | 6.292345 | -4.583679 | 1.075723  |
| 24 | 6 | 0 | 6.711917 | -5.315436 | -0.040716 |
| 25 | 1 | 0 | 6.265903 | -5.787111 | -2.091739 |
| 26 | 1 | 0 | 6.874238 | -4.633174 | 1.993326  |
| 27 | 6 | 0 | 4.128541 | 3.878649  | -0.142438 |
| 28 | 6 | 0 | 5.113281 | 3.867641  | -1.154001 |
| 29 | 6 | 0 | 4.249610 | 4.743528  | 0.966179  |
| 30 | 6 | 0 | 6.205452 | 4.734090  | -1.038357 |
| 31 | 6 | 0 | 5.364958 | 5.584739  | 1.044492  |
| 32 | 6 | 0 | 6.350517 | 5.599471  | 0.051587  |
| 33 | 1 | 0 | 6.960986 | 4.733052  | -1.820889 |
| 34 | 1 | 0 | 5.466640 | 6.242484  | 1.904745  |
| 35 | 6 | 0 | 7.939557 | -6.190550 | 0.023673  |
| 36 | 1 | 0 | 7.680058 | -7.201361 | 0.364283  |
| 37 | 1 | 0 | 8.412523 | -6.290591 | -0.958296 |
| 38 | 1 | 0 | 8.679786 | -5.792191 | 0.724708  |

|    |   |   |           |           |           |
|----|---|---|-----------|-----------|-----------|
| 39 | 6 | 0 | 4.001323  | -4.402765 | -2.573687 |
| 40 | 1 | 0 | 3.049625  | -4.940464 | -2.494269 |
| 41 | 1 | 0 | 3.761786  | -3.371369 | -2.854729 |
| 42 | 1 | 0 | 4.568931  | -4.854550 | -3.391628 |
| 43 | 6 | 0 | 4.727112  | -3.021266 | 2.283037  |
| 44 | 1 | 0 | 4.865080  | -1.941581 | 2.152693  |
| 45 | 1 | 0 | 3.669638  | -3.181248 | 2.521113  |
| 46 | 1 | 0 | 5.320007  | -3.328281 | 3.148817  |
| 47 | 6 | 0 | 5.002653  | 2.957054  | -2.356156 |
| 48 | 1 | 0 | 5.186275  | 1.909815  | -2.089388 |
| 49 | 1 | 0 | 4.005158  | 3.000932  | -2.806922 |
| 50 | 1 | 0 | 5.732847  | 3.235340  | -3.120806 |
| 51 | 6 | 0 | 3.215911  | 4.761279  | 2.069598  |
| 52 | 1 | 0 | 2.278911  | 5.222838  | 1.736781  |
| 53 | 1 | 0 | 2.969400  | 3.749424  | 2.409840  |
| 54 | 1 | 0 | 3.577285  | 5.330412  | 2.930317  |
| 55 | 6 | 0 | 7.524535  | 6.543442  | 0.138163  |
| 56 | 1 | 0 | 8.414834  | 6.120112  | -0.337660 |
| 57 | 1 | 0 | 7.302674  | 7.489709  | -0.372133 |
| 58 | 1 | 0 | 7.769820  | 6.784021  | 1.177286  |
| 59 | 7 | 0 | 0.852939  | -1.359946 | -0.301758 |
| 60 | 7 | 0 | 0.771276  | 1.275732  | -0.396244 |
| 61 | 6 | 0 | -0.638475 | -3.255219 | -0.641809 |
| 62 | 6 | 0 | -0.818625 | 3.036817  | -0.896634 |
| 63 | 1 | 0 | -0.765169 | -3.368758 | -1.726091 |
| 64 | 1 | 0 | -0.757049 | -4.246247 | -0.196108 |
| 65 | 1 | 0 | -1.011757 | 4.064524  | -0.586370 |
| 66 | 1 | 0 | -0.912642 | 3.007928  | -1.989861 |
| 67 | 6 | 0 | -2.207174 | -2.542190 | 1.715094  |
| 68 | 6 | 0 | -2.844875 | -1.413173 | 2.548916  |

|    |   |   |           |           |           |
|----|---|---|-----------|-----------|-----------|
| 69 | 6 | 0 | -2.927127 | -3.882087 | 1.959710  |
| 70 | 1 | 0 | -1.162779 | -2.649569 | 2.048667  |
| 71 | 6 | 0 | -2.841497 | -1.770803 | 4.042621  |
| 72 | 1 | 0 | -3.877484 | -1.251933 | 2.218318  |
| 73 | 1 | 0 | -2.307325 | -0.473904 | 2.386323  |
| 74 | 6 | 0 | -2.910552 | -4.233968 | 3.456376  |
| 75 | 1 | 0 | -3.967481 | -3.794943 | 1.624534  |
| 76 | 1 | 0 | -2.464273 | -4.685835 | 1.376810  |
| 77 | 6 | 0 | -3.535549 | -3.115110 | 4.301485  |
| 78 | 1 | 0 | -3.329088 | -0.970779 | 4.612604  |
| 79 | 1 | 0 | -1.801414 | -1.825583 | 4.395158  |
| 80 | 1 | 0 | -3.443605 | -5.178569 | 3.617413  |
| 81 | 1 | 0 | -1.871479 | -4.395944 | 3.776439  |
| 82 | 1 | 0 | -3.485733 | -3.369855 | 5.366859  |
| 83 | 1 | 0 | -4.601016 | -3.024703 | 4.045921  |
| 84 | 6 | 0 | -3.445998 | -2.398168 | -1.131002 |
| 85 | 6 | 0 | -3.792615 | -3.874078 | -1.414088 |
| 86 | 6 | 0 | -4.674715 | -1.624256 | -0.611753 |
| 87 | 1 | 0 | -3.135863 | -1.939646 | -2.081484 |
| 88 | 6 | 0 | -4.955879 | -3.956160 | -2.417447 |
| 89 | 1 | 0 | -4.085048 | -4.374373 | -0.485578 |
| 90 | 1 | 0 | -2.921789 | -4.407196 | -1.810370 |
| 91 | 6 | 0 | -5.832726 | -1.719200 | -1.615507 |
| 92 | 1 | 0 | -4.990630 | -2.051577 | 0.347995  |
| 93 | 1 | 0 | -4.413015 | -0.577311 | -0.427677 |
| 94 | 6 | 0 | -6.185482 | -3.181294 | -1.922395 |
| 95 | 1 | 0 | -5.211991 | -5.007313 | -2.595524 |
| 96 | 1 | 0 | -4.629054 | -3.540404 | -3.381128 |
| 97 | 1 | 0 | -6.706838 | -1.185939 | -1.222934 |
| 98 | 1 | 0 | -5.541538 | -1.213114 | -2.545709 |

|     |   |   |           |           |           |
|-----|---|---|-----------|-----------|-----------|
| 99  | 1 | 0 | -6.989039 | -3.229752 | -2.666970 |
| 100 | 1 | 0 | -6.568949 | -3.659075 | -1.009506 |
| 101 | 6 | 0 | -2.534007 | 2.345361  | 1.480811  |
| 102 | 6 | 0 | -2.220661 | 3.808057  | 1.854117  |
| 103 | 6 | 0 | -3.990715 | 1.980849  | 1.838616  |
| 104 | 1 | 0 | -1.872985 | 1.709335  | 2.086364  |
| 105 | 6 | 0 | -2.505506 | 4.048794  | 3.346620  |
| 106 | 1 | 0 | -2.831493 | 4.487294  | 1.246558  |
| 107 | 1 | 0 | -1.171069 | 4.040903  | 1.645977  |
| 108 | 6 | 0 | -4.249965 | 2.213199  | 3.334388  |
| 109 | 1 | 0 | -4.673736 | 2.612282  | 1.257008  |
| 110 | 1 | 0 | -4.208494 | 0.941870  | 1.572867  |
| 111 | 6 | 0 | -3.941042 | 3.664122  | 3.728501  |
| 112 | 1 | 0 | -2.311951 | 5.100179  | 3.590450  |
| 113 | 1 | 0 | -1.801361 | 3.450146  | 3.942136  |
| 114 | 1 | 0 | -5.291278 | 1.964050  | 3.570518  |
| 115 | 1 | 0 | -3.617856 | 1.530878  | 3.920186  |
| 116 | 1 | 0 | -4.098090 | 3.809194  | 4.804040  |
| 117 | 1 | 0 | -4.643686 | 4.333217  | 3.211716  |
| 118 | 6 | 0 | -3.573844 | 2.085874  | -1.358518 |
| 119 | 6 | 0 | -3.961828 | 3.571902  | -1.513372 |
| 120 | 6 | 0 | -3.383228 | 1.404924  | -2.729172 |
| 121 | 1 | 0 | -4.391277 | 1.569240  | -0.840859 |
| 122 | 6 | 0 | -5.217627 | 3.717137  | -2.387042 |
| 123 | 1 | 0 | -3.135268 | 4.118441  | -1.985228 |
| 124 | 1 | 0 | -4.131406 | 4.026171  | -0.532209 |
| 125 | 6 | 0 | -4.638215 | 1.575975  | -3.599627 |
| 126 | 1 | 0 | -2.520370 | 1.847657  | -3.245858 |
| 127 | 1 | 0 | -3.163705 | 0.341439  | -2.590310 |
| 128 | 6 | 0 | -5.025476 | 3.052479  | -3.756323 |



|     |   |   |           |          |           |
|-----|---|---|-----------|----------|-----------|
| 129 | 1 | 0 | -5.460485 | 4.779813 | -2.505391 |
| 130 | 1 | 0 | -6.069495 | 3.250462 | -1.872472 |
| 131 | 1 | 0 | -4.470157 | 1.114845 | -4.580249 |
| 132 | 1 | 0 | -5.471467 | 1.034156 | -3.131939 |
| 133 | 1 | 0 | -5.939828 | 3.142975 | -4.354826 |
| 134 | 1 | 0 | -4.232198 | 3.579800 | -4.305384 |

-----  
<sup>1</sup>O<sub>2</sub>C-3-H    E(opt) = -3188.66234278 hartree  
 -----

| Center<br>Number | Atomic<br>Number | Atomic<br>Type | Coordinates (Angstroms) |           |           |
|------------------|------------------|----------------|-------------------------|-----------|-----------|
|                  |                  |                | X                       | Y         | Z         |
| 1                | 77               | 0              | -0.715878               | -0.086647 | -0.338230 |
| 2                | 1                | 0              | -0.943419               | -0.170004 | -2.032824 |
| 3                | 15               | 0              | -1.921006               | -2.041641 | -0.141809 |
| 4                | 15               | 0              | -2.076989               | 1.787106  | -0.202264 |
| 5                | 6                | 0              | 2.147790                | -0.717754 | -0.400312 |
| 6                | 6                | 0              | 0.822030                | -2.675786 | -0.441541 |
| 7                | 6                | 0              | 3.314308                | -1.475328 | -0.334899 |
| 8                | 6                | 0              | 1.965831                | -3.466715 | -0.361518 |
| 9                | 6                | 0              | 3.234087                | -2.872699 | -0.305750 |
| 10               | 1                | 0              | 4.281523                | -0.989019 | -0.292021 |
| 11               | 1                | 0              | 1.867306                | -4.546697 | -0.352576 |
| 12               | 6                | 0              | 2.093873                | 0.755809  | -0.389092 |
| 13               | 6                | 0              | 0.629626                | 2.612285  | -0.443983 |
| 14               | 6                | 0              | 3.198268                | 1.595439  | -0.270807 |
| 15               | 6                | 0              | 1.708479                | 3.483697  | -0.315198 |
| 16               | 6                | 0              | 3.014071                | 2.982317  | -0.218026 |
| 17               | 1                | 0              | 4.195923                | 1.180363  | -0.194505 |
| 18               | 1                | 0              | 1.530358                | 4.553284  | -0.293549 |

|    |   |   |          |           |           |
|----|---|---|----------|-----------|-----------|
| 19 | 6 | 0 | 4.467624 | -3.707145 | -0.218007 |
| 20 | 6 | 0 | 5.334083 | -3.799644 | -1.327596 |
| 21 | 6 | 0 | 4.762460 | -4.396451 | 0.977277  |
| 22 | 6 | 0 | 6.484057 | -4.590227 | -1.222306 |
| 23 | 6 | 0 | 5.926668 | -5.170564 | 1.040633  |
| 24 | 6 | 0 | 6.797672 | -5.284390 | -0.048585 |
| 25 | 1 | 0 | 7.150075 | -4.665910 | -2.079151 |
| 26 | 1 | 0 | 6.160050 | -5.694101 | 1.965255  |
| 27 | 6 | 0 | 4.179047 | 3.899360  | -0.052825 |
| 28 | 6 | 0 | 5.088596 | 4.081896  | -1.115494 |
| 29 | 6 | 0 | 4.369936 | 4.571019  | 1.173557  |
| 30 | 6 | 0 | 6.176530 | 4.943298  | -0.933094 |
| 31 | 6 | 0 | 5.475030 | 5.417874  | 1.314383  |
| 32 | 6 | 0 | 6.387520 | 5.620532  | 0.272890  |
| 33 | 1 | 0 | 6.875862 | 5.087985  | -1.753725 |
| 34 | 1 | 0 | 5.629239 | 5.927313  | 2.263160  |
| 35 | 6 | 0 | 8.026811 | -6.156885 | 0.030073  |
| 36 | 1 | 0 | 7.799928 | -7.182083 | -0.290440 |
| 37 | 1 | 0 | 8.825809 | -5.783974 | -0.618654 |
| 38 | 1 | 0 | 8.412551 | -6.215131 | 1.052832  |
| 39 | 6 | 0 | 5.034253 | -3.071936 | -2.618363 |
| 40 | 1 | 0 | 4.008385 | -3.257726 | -2.955721 |
| 41 | 1 | 0 | 5.137499 | -1.986741 | -2.503357 |
| 42 | 1 | 0 | 5.716092 | -3.388781 | -3.412326 |
| 43 | 6 | 0 | 3.856385 | -4.294447 | 2.182986  |
| 44 | 1 | 0 | 3.626778 | -3.250940 | 2.426222  |
| 45 | 1 | 0 | 2.897073 | -4.795837 | 2.010370  |
| 46 | 1 | 0 | 4.319962 | -4.755122 | 3.059629  |
| 47 | 6 | 0 | 4.899931 | 3.373403  | -2.437532 |
| 48 | 1 | 0 | 5.068916 | 2.294319  | -2.344762 |

|    |   |   |           |           |           |
|----|---|---|-----------|-----------|-----------|
| 49 | 1 | 0 | 3.881404  | 3.501926  | -2.820666 |
| 50 | 1 | 0 | 5.596927  | 3.755970  | -3.188239 |
| 51 | 6 | 0 | 3.418340  | 4.371991  | 2.331239  |
| 52 | 1 | 0 | 2.431730  | 4.801043  | 2.121942  |
| 53 | 1 | 0 | 3.259935  | 3.308404  | 2.542739  |
| 54 | 1 | 0 | 3.802823  | 4.846377  | 3.238300  |
| 55 | 6 | 0 | 7.551485  | 6.567401  | 0.436952  |
| 56 | 1 | 0 | 8.396677  | 6.277723  | -0.195426 |
| 57 | 1 | 0 | 7.267938  | 7.589290  | 0.153128  |
| 58 | 1 | 0 | 7.895241  | 6.603657  | 1.475659  |
| 59 | 7 | 0 | 0.932360  | -1.331450 | -0.450768 |
| 60 | 7 | 0 | 0.838178  | 1.279550  | -0.461094 |
| 61 | 6 | 0 | -0.561133 | -3.251768 | -0.603886 |
| 62 | 6 | 0 | -0.785677 | 3.078523  | -0.652845 |
| 63 | 1 | 0 | -0.697747 | -3.476074 | -1.669458 |
| 64 | 1 | 0 | -0.656060 | -4.198675 | -0.065939 |
| 65 | 1 | 0 | -0.960876 | 4.041476  | -0.170617 |
| 66 | 1 | 0 | -0.914009 | 3.239036  | -1.731387 |
| 67 | 6 | 0 | -2.476271 | -2.609276 | 1.540704  |
| 68 | 6 | 0 | -3.316734 | -1.553585 | 2.282843  |
| 69 | 6 | 0 | -3.158346 | -3.987374 | 1.608512  |
| 70 | 1 | 0 | -1.508849 | -2.651604 | 2.055763  |
| 71 | 6 | 0 | -3.543659 | -1.971059 | 3.743715  |
| 72 | 1 | 0 | -4.289181 | -1.430749 | 1.790251  |
| 73 | 1 | 0 | -2.808200 | -0.588354 | 2.248103  |
| 74 | 6 | 0 | -3.364532 | -4.407843 | 3.073802  |
| 75 | 1 | 0 | -4.137626 | -3.936521 | 1.117225  |
| 76 | 1 | 0 | -2.572462 | -4.748014 | 1.079876  |
| 77 | 6 | 0 | -4.184407 | -3.362348 | 3.843216  |
| 78 | 1 | 0 | -4.169352 | -1.225009 | 4.249589  |

|     |   |   |           |           |           |
|-----|---|---|-----------|-----------|-----------|
| 79  | 1 | 0 | -2.575358 | -1.978667 | 4.263582  |
| 80  | 1 | 0 | -3.859583 | -5.386125 | 3.114085  |
| 81  | 1 | 0 | -2.383194 | -4.527102 | 3.554696  |
| 82  | 1 | 0 | -4.292516 | -3.659923 | 4.893598  |
| 83  | 1 | 0 | -5.198783 | -3.322051 | 3.419944  |
| 84  | 6 | 0 | -3.240118 | -2.356772 | -1.420718 |
| 85  | 6 | 0 | -3.567256 | -3.819556 | -1.786922 |
| 86  | 6 | 0 | -4.532659 | -1.579919 | -1.102545 |
| 87  | 1 | 0 | -2.784168 | -1.891561 | -2.305837 |
| 88  | 6 | 0 | -4.530140 | -3.859612 | -2.986721 |
| 89  | 1 | 0 | -4.038587 | -4.325259 | -0.938726 |
| 90  | 1 | 0 | -2.656660 | -4.378108 | -2.028277 |
| 91  | 6 | 0 | -5.498603 | -1.622803 | -2.295977 |
| 92  | 1 | 0 | -5.020313 | -2.030517 | -0.228659 |
| 93  | 1 | 0 | -4.299600 | -0.543734 | -0.840435 |
| 94  | 6 | 0 | -5.815448 | -3.068163 | -2.705216 |
| 95  | 1 | 0 | -4.769732 | -4.901222 | -3.233337 |
| 96  | 1 | 0 | -4.026736 | -3.432503 | -3.865870 |
| 97  | 1 | 0 | -6.420917 | -1.082475 | -2.049201 |
| 98  | 1 | 0 | -5.039611 | -1.097382 | -3.144437 |
| 99  | 1 | 0 | -6.470306 | -3.080423 | -3.585112 |
| 100 | 1 | 0 | -6.368486 | -3.559388 | -1.891615 |
| 101 | 6 | 0 | -2.810976 | 2.231989  | 1.467387  |
| 102 | 6 | 0 | -2.569960 | 3.667099  | 1.974651  |
| 103 | 6 | 0 | -4.300791 | 1.848442  | 1.583236  |
| 104 | 1 | 0 | -2.228501 | 1.581670  | 2.123265  |
| 105 | 6 | 0 | -3.071239 | 3.811503  | 3.423013  |
| 106 | 1 | 0 | -3.083883 | 4.398170  | 1.337455  |
| 107 | 1 | 0 | -1.501551 | 3.902855  | 1.942047  |
| 108 | 6 | 0 | -4.769030 | 1.973181  | 3.041028  |

|     |   |   |           |           |           |
|-----|---|---|-----------|-----------|-----------|
| 109 | 1 | 0 | -4.914616 | 2.512538  | 0.961756  |
| 110 | 1 | 0 | -4.468487 | 0.828897  | 1.221829  |
| 111 | 6 | 0 | -4.541359 | 3.395944  | 3.569858  |
| 112 | 1 | 0 | -2.930431 | 4.845517  | 3.761869  |
| 113 | 1 | 0 | -2.453689 | 3.177728  | 4.074975  |
| 114 | 1 | 0 | -5.828942 | 1.700304  | 3.117207  |
| 115 | 1 | 0 | -4.209595 | 1.258617  | 3.661006  |
| 116 | 1 | 0 | -4.853381 | 3.469493  | 4.619002  |
| 117 | 1 | 0 | -5.173177 | 4.094205  | 3.001748  |
| 118 | 6 | 0 | -3.445000 | 2.146410  | -1.431936 |
| 119 | 6 | 0 | -3.830325 | 3.642606  | -1.484560 |
| 120 | 6 | 0 | -3.177488 | 1.606898  | -2.849105 |
| 121 | 1 | 0 | -4.305074 | 1.593462  | -1.035870 |
| 122 | 6 | 0 | -5.035704 | 3.875250  | -2.409363 |
| 123 | 1 | 0 | -2.980376 | 4.226194  | -1.861442 |
| 124 | 1 | 0 | -4.057917 | 4.021704  | -0.484980 |
| 125 | 6 | 0 | -4.378297 | 1.859771  | -3.775233 |
| 126 | 1 | 0 | -2.285178 | 2.092364  | -3.268993 |
| 127 | 1 | 0 | -2.960814 | 0.536781  | -2.805557 |
| 128 | 6 | 0 | -4.766505 | 3.342660  | -3.821694 |
| 129 | 1 | 0 | -5.274950 | 4.945375  | -2.439507 |
| 130 | 1 | 0 | -5.914512 | 3.364650  | -1.989900 |
| 131 | 1 | 0 | -4.149554 | 1.489498  | -4.782330 |
| 132 | 1 | 0 | -5.235711 | 1.276548  | -3.411628 |
| 133 | 1 | 0 | -5.646340 | 3.488038  | -4.460477 |
| 134 | 1 | 0 | -3.946543 | 3.918977  | -4.274216 |
| 135 | 6 | 0 | -0.213948 | -0.036260 | 1.821960  |
| 136 | 8 | 0 | 0.091140  | -1.136561 | 2.361958  |
| 137 | 8 | 0 | -0.134490 | 1.100704  | 2.369029  |

---

**<sup>1</sup>HOOC-3-H E(opt) = -3189.16283262 hartree**

---

| Center<br>Number | Atomic<br>Number | Atomic<br>Type | Coordinates (Angstroms) |           |           |
|------------------|------------------|----------------|-------------------------|-----------|-----------|
|                  |                  |                | X                       | Y         | Z         |
| 1                | 77               | 0              | -0.716532               | -0.078829 | -0.216110 |
| 2                | 1                | 0              | -0.913810               | -0.089947 | -1.857006 |
| 3                | 15               | 0              | -1.968702               | -2.032789 | -0.173926 |
| 4                | 15               | 0              | -2.060076               | 1.817657  | -0.166174 |
| 5                | 6                | 0              | 2.139362                | -0.751279 | -0.316027 |
| 6                | 6                | 0              | 0.789122                | -2.694345 | -0.387956 |
| 7                | 6                | 0              | 3.296408                | -1.520470 | -0.258333 |
| 8                | 6                | 0              | 1.926668                | -3.500247 | -0.316210 |
| 9                | 6                | 0              | 3.196702                | -2.918727 | -0.245125 |
| 10               | 1                | 0              | 4.270416                | -1.048057 | -0.212808 |
| 11               | 1                | 0              | 1.817413                | -4.579096 | -0.322520 |
| 12               | 6                | 0              | 2.105454                | 0.728015  | -0.316207 |
| 13               | 6                | 0              | 0.669765                | 2.609008  | -0.417673 |
| 14               | 6                | 0              | 3.223535                | 1.552168  | -0.251793 |
| 15               | 6                | 0              | 1.766282                | 3.467000  | -0.344004 |
| 16               | 6                | 0              | 3.062072                | 2.944847  | -0.248088 |
| 17               | 1                | 0              | 4.216221                | 1.124349  | -0.187159 |
| 18               | 1                | 0              | 1.606627                | 4.539078  | -0.367597 |
| 19               | 6                | 0              | 4.422125                | -3.765725 | -0.155713 |
| 20               | 6                | 0              | 5.177381                | -4.027635 | -1.315542 |
| 21               | 6                | 0              | 4.814248                | -4.289966 | 1.092564  |
| 22               | 6                | 0              | 6.323051                | -4.824313 | -1.206192 |
| 23               | 6                | 0              | 5.968991                | -5.077112 | 1.157787  |
| 24               | 6                | 0              | 6.734119                | -5.359075 | 0.019768  |
| 25               | 1                | 0              | 6.907457                | -5.030453 | -2.100164 |

|    |   |   |          |           |           |
|----|---|---|----------|-----------|-----------|
| 26 | 1 | 0 | 6.279036 | -5.477545 | 2.120511  |
| 27 | 6 | 0 | 4.244874 | 3.846489  | -0.142132 |
| 28 | 6 | 0 | 5.136963 | 3.966605  | -1.227662 |
| 29 | 6 | 0 | 4.460442 | 4.574266  | 1.047685  |
| 30 | 6 | 0 | 6.235635 | 4.824946  | -1.104137 |
| 31 | 6 | 0 | 5.576501 | 5.413352  | 1.129773  |
| 32 | 6 | 0 | 6.475724 | 5.552682  | 0.066162  |
| 33 | 1 | 0 | 6.918368 | 4.928030  | -1.944507 |
| 34 | 1 | 0 | 5.748621 | 5.970279  | 2.048196  |
| 35 | 6 | 0 | 7.955271 | -6.241566 | 0.110663  |
| 36 | 1 | 0 | 7.678812 | -7.301051 | 0.032475  |
| 37 | 1 | 0 | 8.664658 | -6.029726 | -0.695341 |
| 38 | 1 | 0 | 8.472040 | -6.112671 | 1.067204  |
| 39 | 6 | 0 | 4.760417 | -3.464322 | -2.653890 |
| 40 | 1 | 0 | 3.735434 | -3.758200 | -2.908861 |
| 41 | 1 | 0 | 4.782719 | -2.368110 | -2.651461 |
| 42 | 1 | 0 | 5.422146 | -3.812899 | -3.451305 |
| 43 | 6 | 0 | 4.013346 | -3.998396 | 2.340003  |
| 44 | 1 | 0 | 3.915179 | -2.919337 | 2.508290  |
| 45 | 1 | 0 | 2.995403 | -4.398557 | 2.265772  |
| 46 | 1 | 0 | 4.485376 | -4.438575 | 3.222396  |
| 47 | 6 | 0 | 4.914638 | 3.204318  | -2.513896 |
| 48 | 1 | 0 | 5.069434 | 2.127866  | -2.376357 |
| 49 | 1 | 0 | 3.892304 | 3.332681  | -2.886919 |
| 50 | 1 | 0 | 5.605189 | 3.542461  | -3.291166 |
| 51 | 6 | 0 | 3.519763 | 4.449442  | 2.224548  |
| 52 | 1 | 0 | 2.541967 | 4.895701  | 2.009261  |
| 53 | 1 | 0 | 3.339037 | 3.400432  | 2.485314  |
| 54 | 1 | 0 | 3.928492 | 4.952910  | 3.104767  |
| 55 | 6 | 0 | 7.687135 | 6.443737  | 0.192781  |

|    |   |   |           |           |           |
|----|---|---|-----------|-----------|-----------|
| 56 | 1 | 0 | 8.045069  | 6.776359  | -0.786425 |
| 57 | 1 | 0 | 7.470889  | 7.328970  | 0.799694  |
| 58 | 1 | 0 | 8.514224  | 5.911667  | 0.680431  |
| 59 | 7 | 0 | 0.919520  | -1.355205 | -0.369737 |
| 60 | 7 | 0 | 0.859332  | 1.274666  | -0.371746 |
| 61 | 6 | 0 | -0.598277 | -3.256055 | -0.567513 |
| 62 | 6 | 0 | -0.743212 | 3.088336  | -0.620655 |
| 63 | 1 | 0 | -0.700265 | -3.524408 | -1.625767 |
| 64 | 1 | 0 | -0.721447 | -4.179820 | 0.004347  |
| 65 | 1 | 0 | -0.907305 | 4.054104  | -0.140508 |
| 66 | 1 | 0 | -0.868369 | 3.250068  | -1.698526 |
| 67 | 6 | 0 | -2.640801 | -2.613495 | 1.458317  |
| 68 | 6 | 0 | -3.472410 | -1.536709 | 2.181782  |
| 69 | 6 | 0 | -3.391224 | -3.958317 | 1.439858  |
| 70 | 1 | 0 | -1.713963 | -2.737636 | 2.029934  |
| 71 | 6 | 0 | -3.809364 | -1.984434 | 3.612027  |
| 72 | 1 | 0 | -4.404297 | -1.353038 | 1.633958  |
| 73 | 1 | 0 | -2.921131 | -0.594707 | 2.207535  |
| 74 | 6 | 0 | -3.708976 | -4.406613 | 2.876500  |
| 75 | 1 | 0 | -4.332548 | -3.845494 | 0.889326  |
| 76 | 1 | 0 | -2.806065 | -4.729727 | 0.926533  |
| 77 | 6 | 0 | -4.523728 | -3.342949 | 3.625973  |
| 78 | 1 | 0 | -4.427509 | -1.221430 | 4.101025  |
| 79 | 1 | 0 | -2.877407 | -2.057721 | 4.189930  |
| 80 | 1 | 0 | -4.252795 | -5.358899 | 2.854511  |
| 81 | 1 | 0 | -2.766973 | -4.589456 | 3.412756  |
| 82 | 1 | 0 | -4.712463 | -3.664424 | 4.657494  |
| 83 | 1 | 0 | -5.505593 | -3.237810 | 3.142053  |
| 84 | 6 | 0 | -3.208950 | -2.272263 | -1.540521 |
| 85 | 6 | 0 | -3.518194 | -3.721688 | -1.974400 |



|     |   |   |           |           |           |
|-----|---|---|-----------|-----------|-----------|
| 86  | 6 | 0 | -4.515620 | -1.504754 | -1.256221 |
| 87  | 1 | 0 | -2.702915 | -1.776609 | -2.380475 |
| 88  | 6 | 0 | -4.427993 | -3.719143 | -3.214987 |
| 89  | 1 | 0 | -4.024646 | -4.257256 | -1.166220 |
| 90  | 1 | 0 | -2.598673 | -4.272037 | -2.197945 |
| 91  | 6 | 0 | -5.425550 | -1.510014 | -2.493608 |
| 92  | 1 | 0 | -5.041679 | -1.984776 | -0.421849 |
| 93  | 1 | 0 | -4.297264 | -0.477834 | -0.949283 |
| 94  | 6 | 0 | -5.725984 | -2.940754 | -2.960112 |
| 95  | 1 | 0 | -4.651753 | -4.752268 | -3.507005 |
| 96  | 1 | 0 | -3.888957 | -3.260086 | -4.055986 |
| 97  | 1 | 0 | -6.355884 | -0.972984 | -2.272149 |
| 98  | 1 | 0 | -4.927365 | -0.963605 | -3.304916 |
| 99  | 1 | 0 | -6.343908 | -2.924005 | -3.866060 |
| 100 | 1 | 0 | -6.310526 | -3.458526 | -2.186133 |
| 101 | 6 | 0 | -2.778819 | 2.270100  | 1.511662  |
| 102 | 6 | 0 | -2.462787 | 3.684513  | 2.037622  |
| 103 | 6 | 0 | -4.289635 | 1.965790  | 1.611181  |
| 104 | 1 | 0 | -2.275788 | 1.563377  | 2.177906  |
| 105 | 6 | 0 | -2.964008 | 3.837806  | 3.484189  |
| 106 | 1 | 0 | -2.936951 | 4.439536  | 1.398649  |
| 107 | 1 | 0 | -1.383353 | 3.873864  | 2.009304  |
| 108 | 6 | 0 | -4.760526 | 2.102443  | 3.066768  |
| 109 | 1 | 0 | -4.855592 | 2.668872  | 0.989152  |
| 110 | 1 | 0 | -4.505585 | 0.959608  | 1.239243  |
| 111 | 6 | 0 | -4.456022 | 3.503174  | 3.615190  |
| 112 | 1 | 0 | -2.767428 | 4.858247  | 3.834348  |
| 113 | 1 | 0 | -2.385239 | 3.162909  | 4.130687  |
| 114 | 1 | 0 | -5.834743 | 1.890755  | 3.128287  |
| 115 | 1 | 0 | -4.250413 | 1.348226  | 3.682422  |

|     |   |   |           |           |           |
|-----|---|---|-----------|-----------|-----------|
| 116 | 1 | 0 | -4.769719 | 3.579642  | 4.663237  |
| 117 | 1 | 0 | -5.043127 | 4.243508  | 3.053053  |
| 118 | 6 | 0 | -3.398768 | 2.175142  | -1.415614 |
| 119 | 6 | 0 | -3.756930 | 3.678497  | -1.483507 |
| 120 | 6 | 0 | -3.086345 | 1.622826  | -2.819237 |
| 121 | 1 | 0 | -4.273319 | 1.633945  | -1.036701 |
| 122 | 6 | 0 | -4.925786 | 3.922365  | -2.450867 |
| 123 | 1 | 0 | -2.887468 | 4.247190  | -1.836115 |
| 124 | 1 | 0 | -4.010921 | 4.065562  | -0.493136 |
| 125 | 6 | 0 | -4.248236 | 1.895644  | -3.788589 |
| 126 | 1 | 0 | -2.172094 | 2.091894  | -3.208347 |
| 127 | 1 | 0 | -2.891798 | 0.549045  | -2.762778 |
| 128 | 6 | 0 | -4.608617 | 3.384809  | -3.851219 |
| 129 | 1 | 0 | -5.149266 | 4.995290  | -2.489923 |
| 130 | 1 | 0 | -5.825300 | 3.422997  | -2.063652 |
| 131 | 1 | 0 | -3.988052 | 1.518367  | -4.785082 |
| 132 | 1 | 0 | -5.128821 | 1.330250  | -3.455951 |
| 133 | 1 | 0 | -5.460354 | 3.542373  | -4.523885 |
| 134 | 1 | 0 | -3.762763 | 3.948025  | -4.271072 |
| 135 | 6 | 0 | -0.252257 | -0.197696 | 1.901241  |
| 136 | 8 | 0 | -0.097186 | -1.229617 | 2.539544  |
| 137 | 8 | 0 | 0.095174  | 0.950136  | 2.616518  |
| 138 | 1 | 0 | -0.002046 | 1.725274  | 2.044448  |

-----  
<sup>3</sup>HOOC-3-H E(opt) = -3189.08001324 hartree  
 -----

| Center<br>Number | Atomic<br>Number | Atomic<br>Type | Coordinates (Angstroms) |           |           |
|------------------|------------------|----------------|-------------------------|-----------|-----------|
|                  |                  |                | X                       | Y         | Z         |
| 1                | 77               | 0              | -0.729220               | -0.073936 | -0.150029 |

|    |    |   |           |           |           |
|----|----|---|-----------|-----------|-----------|
| 2  | 1  | 0 | -0.715517 | 0.107100  | -1.742249 |
| 3  | 15 | 0 | -2.003700 | -2.052057 | -0.219203 |
| 4  | 15 | 0 | -2.042068 | 1.875475  | -0.133245 |
| 5  | 6  | 0 | 2.119507  | -0.759155 | -0.254488 |
| 6  | 6  | 0 | 0.748090  | -2.730712 | -0.361702 |
| 7  | 6  | 0 | 3.273844  | -1.581975 | -0.185759 |
| 8  | 6  | 0 | 1.864345  | -3.549422 | -0.296842 |
| 9  | 6  | 0 | 3.156728  | -2.958532 | -0.193025 |
| 10 | 1  | 0 | 4.254820  | -1.124415 | -0.122945 |
| 11 | 1  | 0 | 1.752424  | -4.626225 | -0.347171 |
| 12 | 6  | 0 | 2.109626  | 0.667471  | -0.291119 |
| 13 | 6  | 0 | 0.694478  | 2.619916  | -0.421159 |
| 14 | 6  | 0 | 3.246189  | 1.518008  | -0.261855 |
| 15 | 6  | 0 | 1.793841  | 3.457488  | -0.386922 |
| 16 | 6  | 0 | 3.104044  | 2.890999  | -0.286833 |
| 17 | 1  | 0 | 4.236657  | 1.080869  | -0.204382 |
| 18 | 1  | 0 | 1.660072  | 4.530936  | -0.448183 |
| 19 | 6  | 0 | 4.367827  | -3.828890 | -0.111151 |
| 20 | 6  | 0 | 5.104817  | -4.120166 | -1.276623 |
| 21 | 6  | 0 | 4.765888  | -4.358540 | 1.133403  |
| 22 | 6  | 0 | 6.235070  | -4.940511 | -1.176539 |
| 23 | 6  | 0 | 5.903322  | -5.171850 | 1.191682  |
| 24 | 6  | 0 | 6.650045  | -5.476668 | 0.047478  |
| 25 | 1  | 0 | 6.804393  | -5.164832 | -2.076152 |
| 26 | 1  | 0 | 6.214691  | -5.574597 | 2.153258  |
| 27 | 6  | 0 | 4.293628  | 3.788117  | -0.203527 |
| 28 | 6  | 0 | 5.153898  | 3.936332  | -1.311822 |
| 29 | 6  | 0 | 4.546969  | 4.496507  | 0.990435  |
| 30 | 6  | 0 | 6.255072  | 4.793948  | -1.205804 |
| 31 | 6  | 0 | 5.661274  | 5.341019  | 1.055896  |

|    |   |   |           |           |           |
|----|---|---|-----------|-----------|-----------|
| 32 | 6 | 0 | 6.528392  | 5.502615  | -0.030315 |
| 33 | 1 | 0 | 6.913146  | 4.914174  | -2.063871 |
| 34 | 1 | 0 | 5.857771  | 5.882681  | 1.978767  |
| 35 | 6 | 0 | 7.853326  | -6.384933 | 0.128513  |
| 36 | 1 | 0 | 7.557474  | -7.437972 | 0.034473  |
| 37 | 1 | 0 | 8.568770  | -6.175927 | -0.673106 |
| 38 | 1 | 0 | 8.371207  | -6.279554 | 1.087368  |
| 39 | 6 | 0 | 4.686423  | -3.557845 | -2.615410 |
| 40 | 1 | 0 | 3.645448  | -3.812130 | -2.846699 |
| 41 | 1 | 0 | 4.752611  | -2.463783 | -2.627984 |
| 42 | 1 | 0 | 5.318013  | -3.943832 | -3.420397 |
| 43 | 6 | 0 | 3.985642  | -4.042966 | 2.388064  |
| 44 | 1 | 0 | 3.944985  | -2.962382 | 2.569552  |
| 45 | 1 | 0 | 2.947551  | -4.386768 | 2.309970  |
| 46 | 1 | 0 | 4.435486  | -4.518608 | 3.263907  |
| 47 | 6 | 0 | 4.893602  | 3.196703  | -2.604291 |
| 48 | 1 | 0 | 5.051986  | 2.118296  | -2.489848 |
| 49 | 1 | 0 | 3.859066  | 3.329169  | -2.940642 |
| 50 | 1 | 0 | 5.558135  | 3.549758  | -3.397948 |
| 51 | 6 | 0 | 3.643684  | 4.339623  | 2.192146  |
| 52 | 1 | 0 | 2.639691  | 4.733908  | 1.996921  |
| 53 | 1 | 0 | 3.519342  | 3.283973  | 2.460963  |
| 54 | 1 | 0 | 4.048827  | 4.866866  | 3.060253  |
| 55 | 6 | 0 | 7.742218  | 6.394517  | 0.070373  |
| 56 | 1 | 0 | 7.967648  | 6.874079  | -0.887817 |
| 57 | 1 | 0 | 7.603880  | 7.177775  | 0.822296  |
| 58 | 1 | 0 | 8.630354  | 5.817669  | 0.359694  |
| 59 | 7 | 0 | 0.873837  | -1.387041 | -0.298680 |
| 60 | 7 | 0 | 0.851170  | 1.274920  | -0.324184 |
| 61 | 6 | 0 | -0.640893 | -3.273521 | -0.606365 |

|    |   |   |           |           |           |
|----|---|---|-----------|-----------|-----------|
| 62 | 6 | 0 | -0.716587 | 3.115398  | -0.618187 |
| 63 | 1 | 0 | -0.714398 | -3.502407 | -1.675810 |
| 64 | 1 | 0 | -0.802311 | -4.213149 | -0.070751 |
| 65 | 1 | 0 | -0.868813 | 4.085628  | -0.142853 |
| 66 | 1 | 0 | -0.856143 | 3.269798  | -1.694548 |
| 67 | 6 | 0 | -2.693375 | -2.620021 | 1.413933  |
| 68 | 6 | 0 | -3.507599 | -1.528348 | 2.134670  |
| 69 | 6 | 0 | -3.470630 | -3.949472 | 1.381674  |
| 70 | 1 | 0 | -1.770622 | -2.776058 | 1.986817  |
| 71 | 6 | 0 | -3.863275 | -1.975714 | 3.560446  |
| 72 | 1 | 0 | -4.431305 | -1.329661 | 1.579096  |
| 73 | 1 | 0 | -2.940876 | -0.596047 | 2.165467  |
| 74 | 6 | 0 | -3.808658 | -4.395907 | 2.814633  |
| 75 | 1 | 0 | -4.404148 | -3.812661 | 0.823878  |
| 76 | 1 | 0 | -2.895642 | -4.729306 | 0.870237  |
| 77 | 6 | 0 | -4.606655 | -3.318597 | 3.562431  |
| 78 | 1 | 0 | -4.468228 | -1.201295 | 4.047598  |
| 79 | 1 | 0 | -2.937244 | -2.071449 | 4.144309  |
| 80 | 1 | 0 | -4.371877 | -5.336322 | 2.782373  |
| 81 | 1 | 0 | -2.874958 | -4.601577 | 3.356892  |
| 82 | 1 | 0 | -4.809093 | -3.640701 | 4.591002  |
| 83 | 1 | 0 | -5.582384 | -3.190654 | 3.071989  |
| 84 | 6 | 0 | -3.232531 | -2.241597 | -1.600808 |
| 85 | 6 | 0 | -3.534848 | -3.686178 | -2.058067 |
| 86 | 6 | 0 | -4.540202 | -1.479796 | -1.306958 |
| 87 | 1 | 0 | -2.719892 | -1.732146 | -2.428951 |
| 88 | 6 | 0 | -4.449340 | -3.670271 | -3.294650 |
| 89 | 1 | 0 | -4.034584 | -4.236260 | -1.255509 |
| 90 | 1 | 0 | -2.612901 | -4.226561 | -2.293633 |
| 91 | 6 | 0 | -5.450720 | -1.475720 | -2.543942 |

|     |   |   |           |           |           |
|-----|---|---|-----------|-----------|-----------|
| 92  | 1 | 0 | -5.064045 | -1.970417 | -0.477794 |
| 93  | 1 | 0 | -4.323381 | -0.455680 | -0.989228 |
| 94  | 6 | 0 | -5.749624 | -2.902103 | -3.023479 |
| 95  | 1 | 0 | -4.667887 | -4.700822 | -3.598970 |
| 96  | 1 | 0 | -3.915937 | -3.197141 | -4.131335 |
| 97  | 1 | 0 | -6.380576 | -0.940763 | -2.316344 |
| 98  | 1 | 0 | -4.953551 | -0.923307 | -3.351259 |
| 99  | 1 | 0 | -6.372278 | -2.877233 | -3.925871 |
| 100 | 1 | 0 | -6.327614 | -3.431016 | -2.252222 |
| 101 | 6 | 0 | -2.729882 | 2.329773  | 1.551638  |
| 102 | 6 | 0 | -2.413993 | 3.750181  | 2.058704  |
| 103 | 6 | 0 | -4.238529 | 2.021064  | 1.669198  |
| 104 | 1 | 0 | -2.215490 | 1.629925  | 2.220054  |
| 105 | 6 | 0 | -2.899468 | 3.913663  | 3.509615  |
| 106 | 1 | 0 | -2.902411 | 4.493684  | 1.416822  |
| 107 | 1 | 0 | -1.336409 | 3.942498  | 2.014165  |
| 108 | 6 | 0 | -4.695601 | 2.167988  | 3.127924  |
| 109 | 1 | 0 | -4.808177 | 2.721097  | 1.047052  |
| 110 | 1 | 0 | -4.458081 | 1.013519  | 1.303795  |
| 111 | 6 | 0 | -4.388469 | 3.573898  | 3.661913  |
| 112 | 1 | 0 | -2.703273 | 4.937984  | 3.848126  |
| 113 | 1 | 0 | -2.309550 | 3.247396  | 4.155167  |
| 114 | 1 | 0 | -5.768747 | 1.955041  | 3.200844  |
| 115 | 1 | 0 | -4.178892 | 1.419112  | 3.744759  |
| 116 | 1 | 0 | -4.689037 | 3.656950  | 4.713242  |
| 117 | 1 | 0 | -4.985507 | 4.307709  | 3.101864  |
| 118 | 6 | 0 | -3.374892 | 2.200525  | -1.387949 |
| 119 | 6 | 0 | -3.745227 | 3.699047  | -1.484698 |
| 120 | 6 | 0 | -3.022808 | 1.625056  | -2.774122 |
| 121 | 1 | 0 | -4.248351 | 1.655352  | -1.012448 |

|     |   |   |           |           |           |
|-----|---|---|-----------|-----------|-----------|
| 122 | 6 | 0 | -4.886900 | 3.918450  | -2.489366 |
| 123 | 1 | 0 | -2.871726 | 4.272730  | -1.818277 |
| 124 | 1 | 0 | -4.030617 | 4.092203  | -0.504886 |
| 125 | 6 | 0 | -4.159250 | 1.877161  | -3.778542 |
| 126 | 1 | 0 | -2.102256 | 2.092869  | -3.148731 |
| 127 | 1 | 0 | -2.824757 | 0.552241  | -2.693406 |
| 128 | 6 | 0 | -4.522554 | 3.364200  | -3.871837 |
| 129 | 1 | 0 | -5.118056 | 4.988617  | -2.550340 |
| 130 | 1 | 0 | -5.793377 | 3.416298  | -2.122686 |
| 131 | 1 | 0 | -3.870909 | 1.486021  | -4.761679 |
| 132 | 1 | 0 | -5.046989 | 1.315336  | -3.460909 |
| 133 | 1 | 0 | -5.353435 | 3.508201  | -4.572894 |
| 134 | 1 | 0 | -3.666430 | 3.925897  | -4.272258 |
| 135 | 6 | 0 | -0.150256 | 0.073075  | 1.973609  |
| 136 | 8 | 0 | -0.413209 | -0.898288 | 2.646966  |
| 137 | 8 | 0 | 0.503420  | 1.113124  | 2.492776  |
| 138 | 1 | 0 | 0.689838  | 1.758264  | 1.785735  |

-----

**<sup>2</sup>HOOC-2-H E(opt) = -3189.258567 hartree**

-----

| Center<br>Number | Atomic<br>Number | Atomic<br>Type | Coordinates (Angstroms) |           |           |
|------------------|------------------|----------------|-------------------------|-----------|-----------|
|                  |                  |                | X                       | Y         | Z         |
| 1                | 77               | 0              | -0.727249               | -0.091821 | -0.260719 |
| 2                | 1                | 0              | -0.944470               | -0.125914 | -1.907686 |
| 3                | 15               | 0              | -1.967824               | -2.050270 | -0.162720 |
| 4                | 15               | 0              | -2.046317               | 1.824196  | -0.184320 |
| 5                | 6                | 0              | 2.131598                | -0.739988 | -0.383133 |
| 6                | 6                | 0              | 0.780476                | -2.721825 | -0.398977 |
| 7                | 6                | 0              | 3.296869                | -1.549438 | -0.298816 |

|    |   |   |          |           |           |
|----|---|---|----------|-----------|-----------|
| 8  | 6 | 0 | 1.906094 | -3.532438 | -0.307646 |
| 9  | 6 | 0 | 3.193330 | -2.926658 | -0.251019 |
| 10 | 1 | 0 | 4.274256 | -1.080696 | -0.259764 |
| 11 | 1 | 0 | 1.801576 | -4.611277 | -0.292958 |
| 12 | 6 | 0 | 2.099247 | 0.686503  | -0.409468 |
| 13 | 6 | 0 | 0.659484 | 2.606594  | -0.545533 |
| 14 | 6 | 0 | 3.221897 | 1.555236  | -0.337501 |
| 15 | 6 | 0 | 1.741802 | 3.470450  | -0.480114 |
| 16 | 6 | 0 | 3.057248 | 2.926312  | -0.352888 |
| 17 | 1 | 0 | 4.217668 | 1.134992  | -0.248105 |
| 18 | 1 | 0 | 1.589083 | 4.541999  | -0.533804 |
| 19 | 6 | 0 | 4.412646 | -3.782931 | -0.138683 |
| 20 | 6 | 0 | 5.151460 | -4.115588 | -1.292006 |
| 21 | 6 | 0 | 4.817415 | -4.261549 | 1.124805  |
| 22 | 6 | 0 | 6.288059 | -4.923251 | -1.161863 |
| 23 | 6 | 0 | 5.960241 | -5.064746 | 1.213477  |
| 24 | 6 | 0 | 6.708052 | -5.409015 | 0.081264  |
| 25 | 1 | 0 | 6.857893 | -5.178722 | -2.052918 |
| 26 | 1 | 0 | 6.275229 | -5.427859 | 2.189682  |
| 27 | 6 | 0 | 4.231475 | 3.839880  | -0.228416 |
| 28 | 6 | 0 | 5.118376 | 4.012073  | -1.311247 |
| 29 | 6 | 0 | 4.447152 | 4.539173  | 0.979570  |
| 30 | 6 | 0 | 6.207610 | 4.881172  | -1.167648 |
| 31 | 6 | 0 | 5.548384 | 5.395812  | 1.082950  |
| 32 | 6 | 0 | 6.442381 | 5.579412  | 0.021199  |
| 33 | 1 | 0 | 6.886190 | 5.017831  | -2.007090 |
| 34 | 1 | 0 | 5.714842 | 5.929942  | 2.016304  |
| 35 | 6 | 0 | 7.916961 | -6.306352 | 0.196108  |
| 36 | 1 | 0 | 7.627806 | -7.364191 | 0.143690  |
| 37 | 1 | 0 | 8.630581 | -6.124547 | -0.613784 |



|    |   |   |           |           |           |
|----|---|---|-----------|-----------|-----------|
| 38 | 1 | 0 | 8.435359  | -6.160627 | 1.149465  |
| 39 | 6 | 0 | 4.727199  | -3.610749 | -2.651806 |
| 40 | 1 | 0 | 3.687054  | -3.879908 | -2.869456 |
| 41 | 1 | 0 | 4.786441  | -2.517828 | -2.709301 |
| 42 | 1 | 0 | 5.359089  | -4.025775 | -3.442134 |
| 43 | 6 | 0 | 4.038046  | -3.902711 | 2.368520  |
| 44 | 1 | 0 | 3.983361  | -2.816007 | 2.503321  |
| 45 | 1 | 0 | 3.003964  | -4.261699 | 2.309604  |
| 46 | 1 | 0 | 4.497251  | -4.334655 | 3.262092  |
| 47 | 6 | 0 | 4.901604  | 3.284918  | -2.618943 |
| 48 | 1 | 0 | 5.076501  | 2.208087  | -2.514733 |
| 49 | 1 | 0 | 3.872770  | 3.402919  | -2.977156 |
| 50 | 1 | 0 | 5.577783  | 3.660080  | -3.392578 |
| 51 | 6 | 0 | 3.516570  | 4.357118  | 2.156683  |
| 52 | 1 | 0 | 2.509451  | 4.729377  | 1.936697  |
| 53 | 1 | 0 | 3.407794  | 3.297462  | 2.416115  |
| 54 | 1 | 0 | 3.887646  | 4.887973  | 3.037866  |
| 55 | 6 | 0 | 7.640849  | 6.485611  | 0.169440  |
| 56 | 1 | 0 | 8.003338  | 6.834822  | -0.802445 |
| 57 | 1 | 0 | 7.407118  | 7.361802  | 0.783428  |
| 58 | 1 | 0 | 8.471835  | 5.961544  | 0.659428  |
| 59 | 7 | 0 | 0.894889  | -1.381423 | -0.421656 |
| 60 | 7 | 0 | 0.832702  | 1.268632  | -0.471287 |
| 61 | 6 | 0 | -0.613129 | -3.286876 | -0.557861 |
| 62 | 6 | 0 | -0.760523 | 3.071266  | -0.759267 |
| 63 | 1 | 0 | -0.735743 | -3.565439 | -1.611119 |
| 64 | 1 | 0 | -0.736060 | -4.203539 | 0.026219  |
| 65 | 1 | 0 | -0.925323 | 4.067582  | -0.346370 |
| 66 | 1 | 0 | -0.920348 | 3.147830  | -1.841923 |
| 67 | 6 | 0 | -2.626891 | -2.598691 | 1.487141  |

|    |   |   |           |           |           |
|----|---|---|-----------|-----------|-----------|
| 68 | 6 | 0 | -3.441868 | -1.498852 | 2.195046  |
| 69 | 6 | 0 | -3.382701 | -3.939470 | 1.513306  |
| 70 | 1 | 0 | -1.694340 | -2.708886 | 2.052225  |
| 71 | 6 | 0 | -3.767165 | -1.909077 | 3.639013  |
| 72 | 1 | 0 | -4.378441 | -1.317753 | 1.653542  |
| 73 | 1 | 0 | -2.878686 | -0.563608 | 2.192338  |
| 74 | 6 | 0 | -3.688806 | -4.349756 | 2.963899  |
| 75 | 1 | 0 | -4.329349 | -3.839018 | 0.969170  |
| 76 | 1 | 0 | -2.805200 | -4.726132 | 1.014232  |
| 77 | 6 | 0 | -4.489867 | -3.262315 | 3.694155  |
| 78 | 1 | 0 | -4.374756 | -1.130646 | 4.117441  |
| 79 | 1 | 0 | -2.828917 | -1.974922 | 4.207486  |
| 80 | 1 | 0 | -4.238009 | -5.299389 | 2.973039  |
| 81 | 1 | 0 | -2.742473 | -4.523750 | 3.495628  |
| 82 | 1 | 0 | -4.671340 | -3.556773 | 4.735170  |
| 83 | 1 | 0 | -5.475708 | -3.163226 | 3.216756  |
| 84 | 6 | 0 | -3.237598 | -2.325328 | -1.500513 |
| 85 | 6 | 0 | -3.550040 | -3.783344 | -1.902128 |
| 86 | 6 | 0 | -4.542952 | -1.557592 | -1.211834 |
| 87 | 1 | 0 | -2.750184 | -1.844757 | -2.360349 |
| 88 | 6 | 0 | -4.479951 | -3.809899 | -3.127450 |
| 89 | 1 | 0 | -4.041159 | -4.305244 | -1.075407 |
| 90 | 1 | 0 | -2.632180 | -4.335051 | -2.129269 |
| 91 | 6 | 0 | -5.473727 | -1.589998 | -2.433457 |
| 92 | 1 | 0 | -5.054612 | -2.022699 | -0.360105 |
| 93 | 1 | 0 | -4.323651 | -0.523976 | -0.927967 |
| 94 | 6 | 0 | -5.776419 | -3.030633 | -2.867305 |
| 95 | 1 | 0 | -4.705189 | -4.849306 | -3.395752 |
| 96 | 1 | 0 | -3.956541 | -3.365987 | -3.986360 |
| 97 | 1 | 0 | -6.402899 | -1.052454 | -2.207794 |

|     |   |   |           |           |           |
|-----|---|---|-----------|-----------|-----------|
| 98  | 1 | 0 | -4.991647 | -1.057440 | -3.263647 |
| 99  | 1 | 0 | -6.409299 | -3.033756 | -3.763190 |
| 100 | 1 | 0 | -6.346658 | -3.535093 | -2.073963 |
| 101 | 6 | 0 | -2.642587 | 2.336646  | 1.526108  |
| 102 | 6 | 0 | -2.251456 | 3.754263  | 1.987713  |
| 103 | 6 | 0 | -4.148804 | 2.078317  | 1.745806  |
| 104 | 1 | 0 | -2.107680 | 1.636364  | 2.173780  |
| 105 | 6 | 0 | -2.639111 | 3.962368  | 3.461720  |
| 106 | 1 | 0 | -2.750982 | 4.506874  | 1.364510  |
| 107 | 1 | 0 | -1.172452 | 3.910262  | 1.873730  |
| 108 | 6 | 0 | -4.507788 | 2.268459  | 3.227400  |
| 109 | 1 | 0 | -4.742023 | 2.778507  | 1.145945  |
| 110 | 1 | 0 | -4.418485 | 1.068401  | 1.421064  |
| 111 | 6 | 0 | -4.125812 | 3.674146  | 3.711718  |
| 112 | 1 | 0 | -2.390484 | 4.985931  | 3.767537  |
| 113 | 1 | 0 | -2.032384 | 3.289124  | 4.083972  |
| 114 | 1 | 0 | -5.579814 | 2.089704  | 3.375049  |
| 115 | 1 | 0 | -3.973609 | 1.516960  | 3.826056  |
| 116 | 1 | 0 | -4.359401 | 3.788008  | 4.777297  |
| 117 | 1 | 0 | -4.733024 | 4.415743  | 3.172808  |
| 118 | 6 | 0 | -3.470135 | 2.169145  | -1.341086 |
| 119 | 6 | 0 | -3.822722 | 3.672565  | -1.423595 |
| 120 | 6 | 0 | -3.263498 | 1.585505  | -2.752055 |
| 121 | 1 | 0 | -4.319943 | 1.643035  | -0.889428 |
| 122 | 6 | 0 | -5.061484 | 3.901824  | -2.303685 |
| 123 | 1 | 0 | -2.977788 | 4.221304  | -1.858370 |
| 124 | 1 | 0 | -3.994396 | 4.090356  | -0.427866 |
| 125 | 6 | 0 | -4.496829 | 1.834970  | -3.635562 |
| 126 | 1 | 0 | -2.384192 | 2.049048  | -3.220120 |
| 127 | 1 | 0 | -3.058852 | 0.514046  | -2.689927 |

|     |   |   |           |           |           |
|-----|---|---|-----------|-----------|-----------|
| 128 | 6 | 0 | -4.858788 | 3.323489  | -3.709418 |
| 129 | 1 | 0 | -5.281045 | 4.975171  | -2.356020 |
| 130 | 1 | 0 | -5.931632 | 3.421275  | -1.833908 |
| 131 | 1 | 0 | -4.316493 | 1.431300  | -4.639464 |
| 132 | 1 | 0 | -5.349274 | 1.280668  | -3.220669 |
| 133 | 1 | 0 | -5.761167 | 3.466801  | -4.316258 |
| 134 | 1 | 0 | -4.047818 | 3.871025  | -4.210960 |
| 135 | 6 | 0 | -0.208836 | -0.152714 | 1.840424  |
| 136 | 8 | 0 | -0.157669 | -1.138906 | 2.563865  |
| 137 | 8 | 0 | 0.276735  | 1.006897  | 2.456846  |
| 138 | 1 | 0 | 0.300631  | 1.712727  | 1.794079  |

-----  
<sup>2</sup>H-2-CO E(opt) = -3113.294156 hartree  
 -----

| Center<br>Number | Atomic<br>Number | Atomic<br>Type | Coordinates (Angstroms) |           |           |
|------------------|------------------|----------------|-------------------------|-----------|-----------|
|                  |                  |                | X                       | Y         | Z         |
| 1                | 77               | 0              | -0.724289               | -0.051470 | -0.116722 |
| 2                | 1                | 0              | -0.876967               | -0.060889 | -1.727182 |
| 3                | 15               | 0              | -1.960090               | -2.044972 | -0.152295 |
| 4                | 15               | 0              | -2.064490               | 1.888535  | -0.140418 |
| 5                | 6                | 0              | 2.134995                | -0.701481 | -0.285154 |
| 6                | 6                | 0              | 0.776061                | -2.677819 | -0.488946 |
| 7                | 6                | 0              | 3.294747                | -1.522118 | -0.263666 |
| 8                | 6                | 0              | 1.894947                | -3.493116 | -0.461976 |
| 9                | 6                | 0              | 3.186371                | -2.897027 | -0.334838 |
| 10               | 1                | 0              | 4.273708                | -1.061623 | -0.188755 |
| 11               | 1                | 0              | 1.788972                | -4.567397 | -0.556881 |
| 12               | 6                | 0              | 2.105312                | 0.724829  | -0.251013 |
| 13               | 6                | 0              | 0.668772                | 2.652903  | -0.349969 |

|    |   |   |          |           |           |
|----|---|---|----------|-----------|-----------|
| 14 | 6 | 0 | 3.230233 | 1.587898  | -0.161253 |
| 15 | 6 | 0 | 1.754027 | 3.509209  | -0.258146 |
| 16 | 6 | 0 | 3.066662 | 2.958972  | -0.152698 |
| 17 | 1 | 0 | 4.225184 | 1.162996  | -0.088535 |
| 18 | 1 | 0 | 1.604540 | 4.582312  | -0.281558 |
| 19 | 6 | 0 | 4.401177 | -3.765044 | -0.289741 |
| 20 | 6 | 0 | 4.930078 | -4.298766 | -1.482982 |
| 21 | 6 | 0 | 5.011128 | -4.054447 | 0.948322  |
| 22 | 6 | 0 | 6.066275 | -5.113818 | -1.417681 |
| 23 | 6 | 0 | 6.144826 | -4.875379 | 0.971066  |
| 24 | 6 | 0 | 6.686969 | -5.416115 | -0.200345 |
| 25 | 1 | 0 | 6.477734 | -5.518915 | -2.339845 |
| 26 | 1 | 0 | 6.614808 | -5.098341 | 1.926688  |
| 27 | 6 | 0 | 4.245912 | 3.868796  | -0.038021 |
| 28 | 6 | 0 | 4.803141 | 4.447122  | -1.196468 |
| 29 | 6 | 0 | 4.788952 | 4.156498  | 1.231002  |
| 30 | 6 | 0 | 5.903435 | 5.302887  | -1.066274 |
| 31 | 6 | 0 | 5.888205 | 5.018577  | 1.319061  |
| 32 | 6 | 0 | 6.462159 | 5.599093  | 0.182054  |
| 33 | 1 | 0 | 6.333655 | 5.747882  | -1.961087 |
| 34 | 1 | 0 | 6.304331 | 5.244102  | 2.298782  |
| 35 | 6 | 0 | 7.890308 | -6.326453 | -0.148078 |
| 36 | 1 | 0 | 7.585661 | -7.372494 | -0.012706 |
| 37 | 1 | 0 | 8.472545 | -6.275796 | -1.073701 |
| 38 | 1 | 0 | 8.550254 | -6.071357 | 0.687372  |
| 39 | 6 | 0 | 4.294440 | -3.983407 | -2.816882 |
| 40 | 1 | 0 | 3.262462 | -4.349534 | -2.866090 |
| 41 | 1 | 0 | 4.252073 | -2.901736 | -2.990500 |
| 42 | 1 | 0 | 4.854168 | -4.438539 | -3.638649 |
| 43 | 6 | 0 | 4.452911 | -3.493288 | 2.235939  |

|    |   |   |           |           |           |
|----|---|---|-----------|-----------|-----------|
| 44 | 1 | 0 | 4.539279  | -2.401123 | 2.268297  |
| 45 | 1 | 0 | 3.387356  | -3.727439 | 2.343929  |
| 46 | 1 | 0 | 4.980332  | -3.899058 | 3.103811  |
| 47 | 6 | 0 | 4.228487  | 4.144111  | -2.560504 |
| 48 | 1 | 0 | 4.245111  | 3.067703  | -2.767744 |
| 49 | 1 | 0 | 3.181655  | 4.461187  | -2.633171 |
| 50 | 1 | 0 | 4.791585  | 4.651254  | -3.348854 |
| 51 | 6 | 0 | 4.191929  | 3.551223  | 2.480448  |
| 52 | 1 | 0 | 3.118082  | 3.760650  | 2.551105  |
| 53 | 1 | 0 | 4.300056  | 2.460428  | 2.486923  |
| 54 | 1 | 0 | 4.675266  | 3.943815  | 3.379473  |
| 55 | 6 | 0 | 7.669654  | 6.497984  | 0.298231  |
| 56 | 1 | 0 | 7.721643  | 7.209706  | -0.531769 |
| 57 | 1 | 0 | 7.660106  | 7.063580  | 1.235658  |
| 58 | 1 | 0 | 8.597981  | 5.912085  | 0.283401  |
| 59 | 7 | 0 | 0.897932  | -1.338949 | -0.366416 |
| 60 | 7 | 0 | 0.843542  | 1.315213  | -0.321246 |
| 61 | 6 | 0 | -0.617691 | -3.199098 | -0.750052 |
| 62 | 6 | 0 | -0.741305 | 3.142032  | -0.578466 |
| 63 | 1 | 0 | -0.746304 | -3.264241 | -1.837719 |
| 64 | 1 | 0 | -0.751476 | -4.207890 | -0.351830 |
| 65 | 1 | 0 | -0.915883 | 4.100815  | -0.087547 |
| 66 | 1 | 0 | -0.855294 | 3.318878  | -1.654791 |
| 67 | 6 | 0 | -2.435856 | -2.682567 | 1.528589  |
| 68 | 6 | 0 | -3.280544 | -1.688181 | 2.354005  |
| 69 | 6 | 0 | -3.092120 | -4.077577 | 1.551593  |
| 70 | 1 | 0 | -1.448558 | -2.768321 | 2.009527  |
| 71 | 6 | 0 | -3.426412 | -2.179495 | 3.802134  |
| 72 | 1 | 0 | -4.276052 | -1.595233 | 1.906036  |
| 73 | 1 | 0 | -2.840698 | -0.687790 | 2.339623  |

|     |   |   |           |           |           |
|-----|---|---|-----------|-----------|-----------|
| 74  | 6 | 0 | -3.234865 | -4.574985 | 2.999859  |
| 75  | 1 | 0 | -4.087129 | -4.011465 | 1.096205  |
| 76  | 1 | 0 | -2.512135 | -4.796707 | 0.963761  |
| 77  | 6 | 0 | -4.037267 | -3.586576 | 3.857172  |
| 78  | 1 | 0 | -4.042814 | -1.471319 | 4.368786  |
| 79  | 1 | 0 | -2.435928 | -2.192845 | 4.278593  |
| 80  | 1 | 0 | -3.714726 | -5.560926 | 3.003132  |
| 81  | 1 | 0 | -2.233638 | -4.706371 | 3.433923  |
| 82  | 1 | 0 | -4.090185 | -3.938526 | 4.894358  |
| 83  | 1 | 0 | -5.070114 | -3.543676 | 3.482975  |
| 84  | 6 | 0 | -3.329262 | -2.213022 | -1.389262 |
| 85  | 6 | 0 | -3.651054 | -3.644988 | -1.868213 |
| 86  | 6 | 0 | -4.611096 | -1.496068 | -0.922778 |
| 87  | 1 | 0 | -2.921331 | -1.659016 | -2.246043 |
| 88  | 6 | 0 | -4.690185 | -3.596749 | -3.001853 |
| 89  | 1 | 0 | -4.053493 | -4.234643 | -1.038496 |
| 90  | 1 | 0 | -2.748071 | -4.154211 | -2.219276 |
| 91  | 6 | 0 | -5.644716 | -1.450523 | -2.057067 |
| 92  | 1 | 0 | -5.037340 | -2.042207 | -0.072621 |
| 93  | 1 | 0 | -4.379393 | -0.486247 | -0.571457 |
| 94  | 6 | 0 | -5.966514 | -2.860575 | -2.570909 |
| 95  | 1 | 0 | -4.927367 | -4.617843 | -3.323474 |
| 96  | 1 | 0 | -4.250501 | -3.083792 | -3.868986 |
| 97  | 1 | 0 | -6.555704 | -0.949713 | -1.707960 |
| 98  | 1 | 0 | -5.244470 | -0.847205 | -2.882275 |
| 99  | 1 | 0 | -6.674728 | -2.808615 | -3.406548 |
| 100 | 1 | 0 | -6.459641 | -3.431880 | -1.771480 |
| 101 | 6 | 0 | -2.800706 | 2.335863  | 1.522610  |
| 102 | 6 | 0 | -2.665928 | 3.803579  | 1.973154  |
| 103 | 6 | 0 | -4.260456 | 1.846606  | 1.645171  |

|     |   |   |           |          |           |
|-----|---|---|-----------|----------|-----------|
| 104 | 1 | 0 | -2.201321 | 1.737501 | 2.217582  |
| 105 | 6 | 0 | -3.188571 | 3.964241 | 3.411670  |
| 106 | 1 | 0 | -3.230464 | 4.459706 | 1.300217  |
| 107 | 1 | 0 | -1.618840 | 4.121380 | 1.934872  |
| 108 | 6 | 0 | -4.755740 | 2.001535 | 3.090447  |
| 109 | 1 | 0 | -4.902707 | 2.440957 | 0.984026  |
| 110 | 1 | 0 | -4.347300 | 0.803859 | 1.325324  |
| 111 | 6 | 0 | -4.628687 | 3.456229 | 3.563143  |
| 112 | 1 | 0 | -3.119844 | 5.017272 | 3.709424  |
| 113 | 1 | 0 | -2.533924 | 3.399116 | 4.090471  |
| 114 | 1 | 0 | -5.796267 | 1.663068 | 3.161168  |
| 115 | 1 | 0 | -4.162303 | 1.348869 | 3.746447  |
| 116 | 1 | 0 | -4.954532 | 3.548619 | 4.606122  |
| 117 | 1 | 0 | -5.299524 | 4.087727 | 2.963334  |
| 118 | 6 | 0 | -3.375314 | 2.153377 | -1.434291 |
| 119 | 6 | 0 | -3.823264 | 3.631090 | -1.523124 |
| 120 | 6 | 0 | -2.957203 | 1.614096 | -2.817025 |
| 121 | 1 | 0 | -4.229128 | 1.558507 | -1.090116 |
| 122 | 6 | 0 | -4.938823 | 3.807372 | -2.565406 |
| 123 | 1 | 0 | -2.969687 | 4.258312 | -1.809912 |
| 124 | 1 | 0 | -4.170751 | 3.986488 | -0.549442 |
| 125 | 6 | 0 | -4.071035 | 1.823909 | -3.855241 |
| 126 | 1 | 0 | -2.047542 | 2.126965 | -3.157450 |
| 127 | 1 | 0 | -2.713019 | 0.551296 | -2.743289 |
| 128 | 6 | 0 | -4.504306 | 3.291974 | -3.942154 |
| 129 | 1 | 0 | -5.221230 | 4.865534 | -2.619750 |
| 130 | 1 | 0 | -5.830578 | 3.255770 | -2.235438 |
| 131 | 1 | 0 | -3.729222 | 1.462148 | -4.832459 |
| 132 | 1 | 0 | -4.939425 | 1.212407 | -3.576209 |
| 133 | 1 | 0 | -5.318676 | 3.406004 | -4.667671 |



|     |   |   |           |           |           |
|-----|---|---|-----------|-----------|-----------|
| 134 | 1 | 0 | -3.664131 | 3.899785  | -4.307562 |
| 135 | 6 | 0 | -0.409455 | -0.054785 | 1.840694  |
| 136 | 8 | 0 | -0.112746 | -0.053637 | 2.951504  |

-----  
**<sup>1</sup>H-3-H E(opt) = -3000.56804260 hartree**  
 -----

| Center<br>Number | Atomic<br>Number | Atomic<br>Type | Coordinates (Angstroms) |           |           |
|------------------|------------------|----------------|-------------------------|-----------|-----------|
|                  |                  |                | X                       | Y         | Z         |
| 1                | 77               | 0              | -0.763246               | -0.091975 | -0.277034 |
| 2                | 1                | 0              | -0.944897               | -0.189679 | -1.948324 |
| 3                | 15               | 0              | -1.954615               | -2.049305 | -0.046625 |
| 4                | 15               | 0              | -2.083594               | 1.810280  | -0.187682 |
| 5                | 6                | 0              | 2.102307                | -0.741066 | -0.272472 |
| 6                | 6                | 0              | 0.772590                | -2.698320 | -0.360216 |
| 7                | 6                | 0              | 3.265822                | -1.502813 | -0.205218 |
| 8                | 6                | 0              | 1.913563                | -3.493403 | -0.272348 |
| 9                | 6                | 0              | 3.180875                | -2.901306 | -0.190726 |
| 10               | 1                | 0              | 4.235189                | -1.020267 | -0.168182 |
| 11               | 1                | 0              | 1.812766                | -4.572940 | -0.278952 |
| 12               | 6                | 0              | 2.055415                | 0.736070  | -0.306459 |
| 13               | 6                | 0              | 0.609743                | 2.596997  | -0.531697 |
| 14               | 6                | 0              | 3.163813                | 1.574296  | -0.224351 |
| 15               | 6                | 0              | 1.693796                | 3.468352  | -0.447470 |
| 16               | 6                | 0              | 2.990054                | 2.963283  | -0.278714 |
| 17               | 1                | 0              | 4.156866                | 1.158587  | -0.105265 |
| 18               | 1                | 0              | 1.526561                | 4.537292  | -0.519351 |
| 19               | 6                | 0              | 4.411691                | -3.739979 | -0.104570 |
| 20               | 6                | 0              | 4.845632                | -4.465270 | -1.234072 |
| 21               | 6                | 0              | 5.133879                | -3.800624 | 1.105817  |

|    |   |   |          |           |           |
|----|---|---|----------|-----------|-----------|
| 22 | 6 | 0 | 6.004316 | -5.243076 | -1.130842 |
| 23 | 6 | 0 | 6.282698 | -4.597207 | 1.165867  |
| 24 | 6 | 0 | 6.733759 | -5.326778 | 0.060255  |
| 25 | 1 | 0 | 6.346170 | -5.794616 | -2.003883 |
| 26 | 1 | 0 | 6.837728 | -4.649558 | 2.099899  |
| 27 | 6 | 0 | 4.160906 | 3.880161  | -0.160016 |
| 28 | 6 | 0 | 5.073196 | 3.997536  | -1.229286 |
| 29 | 6 | 0 | 4.351126 | 4.616184  | 1.027965  |
| 30 | 6 | 0 | 6.165639 | 4.860800  | -1.090992 |
| 31 | 6 | 0 | 5.461862 | 5.461792  | 1.125904  |
| 32 | 6 | 0 | 6.378053 | 5.601022  | 0.077535  |
| 33 | 1 | 0 | 6.867656 | 4.956432  | -1.916403 |
| 34 | 1 | 0 | 5.616543 | 6.021475  | 2.045711  |
| 35 | 6 | 0 | 7.957902 | -6.204129 | 0.158861  |
| 36 | 1 | 0 | 7.687349 | -7.216712 | 0.485400  |
| 37 | 1 | 0 | 8.462213 | -6.299219 | -0.807973 |
| 38 | 1 | 0 | 8.676095 | -5.810422 | 0.885075  |
| 39 | 6 | 0 | 4.094564 | -4.398952 | -2.544251 |
| 40 | 1 | 0 | 3.117584 | -4.890812 | -2.474179 |
| 41 | 1 | 0 | 3.906674 | -3.363017 | -2.848111 |
| 42 | 1 | 0 | 4.657825 | -4.890479 | -3.342093 |
| 43 | 6 | 0 | 4.679912 | -3.034125 | 2.327015  |
| 44 | 1 | 0 | 4.788857 | -1.952351 | 2.187350  |
| 45 | 1 | 0 | 3.622677 | -3.220042 | 2.547570  |
| 46 | 1 | 0 | 5.265470 | -3.316881 | 3.206009  |
| 47 | 6 | 0 | 4.880355 | 3.218503  | -2.510003 |
| 48 | 1 | 0 | 5.012688 | 2.142067  | -2.350886 |
| 49 | 1 | 0 | 3.871715 | 3.356733  | -2.915737 |
| 50 | 1 | 0 | 5.599278 | 3.534096  | -3.270857 |
| 51 | 6 | 0 | 3.391453 | 4.488146  | 2.188734  |

|    |   |   |           |           |           |
|----|---|---|-----------|-----------|-----------|
| 52 | 1 | 0 | 2.404247  | 4.895821  | 1.942236  |
| 53 | 1 | 0 | 3.239185  | 3.439811  | 2.469984  |
| 54 | 1 | 0 | 3.764894  | 5.024607  | 3.065169  |
| 55 | 6 | 0 | 7.548686  | 6.546745  | 0.191871  |
| 56 | 1 | 0 | 8.408916  | 6.191322  | -0.384344 |
| 57 | 1 | 0 | 7.287570  | 7.540544  | -0.194496 |
| 58 | 1 | 0 | 7.860616  | 6.674751  | 1.233187  |
| 59 | 7 | 0 | 0.887433  | -1.354066 | -0.332921 |
| 60 | 7 | 0 | 0.807880  | 1.266534  | -0.428161 |
| 61 | 6 | 0 | -0.613694 | -3.253737 | -0.565833 |
| 62 | 6 | 0 | -0.802564 | 3.038356  | -0.807039 |
| 63 | 1 | 0 | -0.747828 | -3.407249 | -1.644487 |
| 64 | 1 | 0 | -0.726825 | -4.229098 | -0.086184 |
| 65 | 1 | 0 | -0.981361 | 4.055857  | -0.457026 |
| 66 | 1 | 0 | -0.935052 | 3.046760  | -1.896988 |
| 67 | 6 | 0 | -2.350530 | -2.559659 | 1.700447  |
| 68 | 6 | 0 | -3.129074 | -1.487374 | 2.488010  |
| 69 | 6 | 0 | -3.021070 | -3.937326 | 1.863594  |
| 70 | 1 | 0 | -1.339778 | -2.616937 | 2.133786  |
| 71 | 6 | 0 | -3.230731 | -1.869058 | 3.972695  |
| 72 | 1 | 0 | -4.138910 | -1.386557 | 2.072353  |
| 73 | 1 | 0 | -2.638808 | -0.516985 | 2.384571  |
| 74 | 6 | 0 | -3.108555 | -4.320429 | 3.350530  |
| 75 | 1 | 0 | -4.035264 | -3.893139 | 1.449111  |
| 76 | 1 | 0 | -2.477907 | -4.709873 | 1.308164  |
| 77 | 6 | 0 | -3.862363 | -3.255363 | 4.158973  |
| 78 | 1 | 0 | -3.810804 | -1.107943 | 4.508938  |
| 79 | 1 | 0 | -2.222290 | -1.867539 | 4.411025  |
| 80 | 1 | 0 | -3.599573 | -5.295882 | 3.451689  |
| 81 | 1 | 0 | -2.091838 | -4.432479 | 3.753286  |

|     |   |   |           |           |           |
|-----|---|---|-----------|-----------|-----------|
| 82  | 1 | 0 | -3.882423 | -3.526659 | 5.221466  |
| 83  | 1 | 0 | -4.907909 | -3.222194 | 3.820162  |
| 84  | 6 | 0 | -3.362965 | -2.386935 | -1.208041 |
| 85  | 6 | 0 | -3.687877 | -3.861112 | -1.527130 |
| 86  | 6 | 0 | -4.635602 | -1.626150 | -0.785330 |
| 87  | 1 | 0 | -2.987304 | -1.922761 | -2.130984 |
| 88  | 6 | 0 | -4.756993 | -3.936887 | -2.631123 |
| 89  | 1 | 0 | -4.064746 | -4.365099 | -0.631800 |
| 90  | 1 | 0 | -2.789341 | -4.399363 | -1.846763 |
| 91  | 6 | 0 | -5.702259 | -1.707801 | -1.887352 |
| 92  | 1 | 0 | -5.033569 | -2.072480 | 0.134718  |
| 93  | 1 | 0 | -4.399577 | -0.581309 | -0.559993 |
| 94  | 6 | 0 | -6.026316 | -3.165714 | -2.242388 |
| 95  | 1 | 0 | -4.996125 | -4.986666 | -2.839707 |
| 96  | 1 | 0 | -4.345611 | -3.513936 | -3.558710 |
| 97  | 1 | 0 | -6.608411 | -1.179246 | -1.567150 |
| 98  | 1 | 0 | -5.331107 | -1.190223 | -2.782005 |
| 99  | 1 | 0 | -6.758976 | -3.204882 | -3.057584 |
| 100 | 1 | 0 | -6.491788 | -3.653265 | -1.373748 |
| 101 | 6 | 0 | -2.585558 | 2.344799  | 1.541321  |
| 102 | 6 | 0 | -2.250229 | 3.796718  | 1.936499  |
| 103 | 6 | 0 | -4.061326 | 2.015210  | 1.852440  |
| 104 | 1 | 0 | -1.964470 | 1.691208  | 2.163560  |
| 105 | 6 | 0 | -2.572292 | 4.033010  | 3.422451  |
| 106 | 1 | 0 | -2.823702 | 4.500131  | 1.319997  |
| 107 | 1 | 0 | -1.189040 | 4.004863  | 1.762478  |
| 108 | 6 | 0 | -4.358198 | 2.239686  | 3.342772  |
| 109 | 1 | 0 | -4.717257 | 2.664971  | 1.260045  |
| 110 | 1 | 0 | -4.294772 | 0.982658  | 1.573028  |
| 111 | 6 | 0 | -4.026900 | 3.679219  | 3.759926  |

|     |   |   |           |           |           |
|-----|---|---|-----------|-----------|-----------|
| 112 | 1 | 0 | -2.361652 | 5.077493  | 3.682305  |
| 113 | 1 | 0 | -1.900359 | 3.412574  | 4.032601  |
| 114 | 1 | 0 | -5.411337 | 2.013016  | 3.548364  |
| 115 | 1 | 0 | -3.758479 | 1.537632  | 3.939292  |
| 116 | 1 | 0 | -4.211686 | 3.818752  | 4.831970  |
| 117 | 1 | 0 | -4.698707 | 4.369394  | 3.229637  |
| 118 | 6 | 0 | -3.550075 | 2.123112  | -1.291039 |
| 119 | 6 | 0 | -3.906763 | 3.621438  | -1.414471 |
| 120 | 6 | 0 | -3.403072 | 1.474807  | -2.680985 |
| 121 | 1 | 0 | -4.378931 | 1.616986  | -0.781251 |
| 122 | 6 | 0 | -5.176420 | 3.816976  | -2.258070 |
| 123 | 1 | 0 | -3.077451 | 4.155912  | -1.895171 |
| 124 | 1 | 0 | -4.046848 | 4.069164  | -0.426397 |
| 125 | 6 | 0 | -4.669502 | 1.692856  | -3.524487 |
| 126 | 1 | 0 | -2.539126 | 1.909262  | -3.202769 |
| 127 | 1 | 0 | -3.204682 | 0.404906  | -2.574447 |
| 128 | 6 | 0 | -5.028787 | 3.179279  | -3.644963 |
| 129 | 1 | 0 | -5.396188 | 4.887757  | -2.347263 |
| 130 | 1 | 0 | -6.028918 | 3.359236  | -1.736210 |
| 131 | 1 | 0 | -4.529801 | 1.248097  | -4.517364 |
| 132 | 1 | 0 | -5.506151 | 1.158983  | -3.053400 |
| 133 | 1 | 0 | -5.953100 | 3.302288  | -4.222368 |
| 134 | 1 | 0 | -4.235498 | 3.701208  | -4.199304 |
| 135 | 1 | 0 | -0.584622 | -0.018268 | 1.386608  |

-----  
<sup>2</sup>TS1 E(opt) = -3648.901609 hartree  
 -----

| Center | Atomic | Atomic | Coordinates (Angstroms) |   |   |
|--------|--------|--------|-------------------------|---|---|
| Number | Number | Type   | X                       | Y | Z |

-----

|    |    |   |           |           |           |
|----|----|---|-----------|-----------|-----------|
| 1  | 77 | 0 | -0.717521 | -0.064244 | -0.082700 |
| 2  | 1  | 0 | -0.868013 | -0.147148 | -1.783309 |
| 3  | 15 | 0 | -1.954137 | -2.020186 | 0.053885  |
| 4  | 15 | 0 | -2.040590 | 1.853830  | -0.074584 |
| 5  | 6  | 0 | 2.128982  | -0.731916 | -0.187373 |
| 6  | 6  | 0 | 0.776431  | -2.695775 | -0.220949 |
| 7  | 6  | 0 | 3.287581  | -1.523751 | -0.092239 |
| 8  | 6  | 0 | 1.902849  | -3.502895 | -0.135420 |
| 9  | 6  | 0 | 3.185672  | -2.909064 | -0.063199 |
| 10 | 1  | 0 | 4.263635  | -1.053690 | -0.047349 |
| 11 | 1  | 0 | 1.796755  | -4.581943 | -0.145403 |
| 12 | 6  | 0 | 2.095546  | 0.717685  | -0.235120 |
| 13 | 6  | 0 | 0.661204  | 2.611374  | -0.427442 |
| 14 | 6  | 0 | 3.214295  | 1.565979  | -0.158742 |
| 15 | 6  | 0 | 1.745878  | 3.473091  | -0.361110 |
| 16 | 6  | 0 | 3.052073  | 2.945008  | -0.209873 |
| 17 | 1  | 0 | 4.206496  | 1.143820  | -0.048033 |
| 18 | 1  | 0 | 1.592108  | 4.543312  | -0.441866 |
| 19 | 6  | 0 | 4.405993  | -3.765659 | 0.018773  |
| 20 | 6  | 0 | 4.970235  | -4.290609 | -1.161336 |
| 21 | 6  | 0 | 4.978769  | -4.055789 | 1.273364  |
| 22 | 6  | 0 | 6.107377  | -5.101312 | -1.065654 |
| 23 | 6  | 0 | 6.115044  | -4.871445 | 1.326261  |
| 24 | 6  | 0 | 6.695554  | -5.401785 | 0.168168  |
| 25 | 1  | 0 | 6.543059  | -5.507288 | -1.976187 |
| 26 | 1  | 0 | 6.555249  | -5.099983 | 2.294618  |
| 27 | 6  | 0 | 4.228651  | 3.857679  | -0.109903 |
| 28 | 6  | 0 | 5.103441  | 4.004731  | -1.205519 |
| 29 | 6  | 0 | 4.462017  | 4.568843  | 1.086860  |
| 30 | 6  | 0 | 6.200646  | 4.867010  | -1.086125 |

|    |   |   |          |           |           |
|----|---|---|----------|-----------|-----------|
| 31 | 6 | 0 | 5.572351 | 5.415952  | 1.166244  |
| 32 | 6 | 0 | 6.452222 | 5.581494  | 0.089663  |
| 33 | 1 | 0 | 6.873906 | 4.982010  | -1.932876 |
| 34 | 1 | 0 | 5.757986 | 5.955693  | 2.092603  |
| 35 | 6 | 0 | 7.940985 | -6.251723 | 0.246675  |
| 36 | 1 | 0 | 8.007595 | -6.945236 | -0.597612 |
| 37 | 1 | 0 | 8.844055 | -5.627733 | 0.227335  |
| 38 | 1 | 0 | 7.970746 | -6.834336 | 1.173101  |
| 39 | 6 | 0 | 4.360373 | -3.983003 | -2.508979 |
| 40 | 1 | 0 | 3.333263 | -4.360100 | -2.578987 |
| 41 | 1 | 0 | 4.309474 | -2.902168 | -2.685330 |
| 42 | 1 | 0 | 4.941960 | -4.433054 | -3.318230 |
| 43 | 6 | 0 | 4.372255 | -3.503430 | 2.542109  |
| 44 | 1 | 0 | 4.397203 | -2.407522 | 2.552416  |
| 45 | 1 | 0 | 3.319485 | -3.793716 | 2.639762  |
| 46 | 1 | 0 | 4.907596 | -3.862627 | 3.425387  |
| 47 | 6 | 0 | 4.865911 | 3.254667  | -2.496181 |
| 48 | 1 | 0 | 4.983374 | 2.173384  | -2.361560 |
| 49 | 1 | 0 | 3.848342 | 3.415724  | -2.870510 |
| 50 | 1 | 0 | 5.568538 | 3.574564  | -3.270691 |
| 51 | 6 | 0 | 3.544320 | 4.404806  | 2.276385  |
| 52 | 1 | 0 | 2.532212 | 4.763904  | 2.057334  |
| 53 | 1 | 0 | 3.447594 | 3.350686  | 2.561853  |
| 54 | 1 | 0 | 3.918615 | 4.959208  | 3.141407  |
| 55 | 6 | 0 | 7.620532 | 6.532311  | 0.189356  |
| 56 | 1 | 0 | 8.393138 | 6.299504  | -0.549717 |
| 57 | 1 | 0 | 7.299549 | 7.567429  | 0.013279  |
| 58 | 1 | 0 | 8.076531 | 6.503457  | 1.184617  |
| 59 | 7 | 0 | 0.898328 | -1.350862 | -0.227934 |
| 60 | 7 | 0 | 0.840566 | 1.274704  | -0.341417 |

|    |   |   |           |           |           |
|----|---|---|-----------|-----------|-----------|
| 61 | 6 | 0 | -0.614839 | -3.242789 | -0.417985 |
| 62 | 6 | 0 | -0.749201 | 3.069148  | -0.690991 |
| 63 | 1 | 0 | -0.738921 | -3.410903 | -1.493903 |
| 64 | 1 | 0 | -0.741554 | -4.205649 | 0.083239  |
| 65 | 1 | 0 | -0.918197 | 4.085152  | -0.331484 |
| 66 | 1 | 0 | -0.884838 | 3.087513  | -1.779463 |
| 67 | 6 | 0 | -2.485897 | -2.531645 | 1.759134  |
| 68 | 6 | 0 | -3.347185 | -1.459523 | 2.457010  |
| 69 | 6 | 0 | -3.146391 | -3.917473 | 1.883422  |
| 70 | 1 | 0 | -1.518948 | -2.558567 | 2.282033  |
| 71 | 6 | 0 | -3.567803 | -1.820279 | 3.933785  |
| 72 | 1 | 0 | -4.320717 | -1.384383 | 1.958336  |
| 73 | 1 | 0 | -2.859197 | -0.487162 | 2.377996  |
| 74 | 6 | 0 | -3.353613 | -4.279873 | 3.363732  |
| 75 | 1 | 0 | -4.122532 | -3.897028 | 1.384249  |
| 76 | 1 | 0 | -2.546912 | -4.689302 | 1.388042  |
| 77 | 6 | 0 | -4.189353 | -3.215378 | 4.088928  |
| 78 | 1 | 0 | -4.203981 | -1.062583 | 4.408069  |
| 79 | 1 | 0 | -2.600358 | -1.793736 | 4.455167  |
| 80 | 1 | 0 | -3.836206 | -5.261935 | 3.440602  |
| 81 | 1 | 0 | -2.372677 | -4.368169 | 3.852152  |
| 82 | 1 | 0 | -4.294008 | -3.471597 | 5.150364  |
| 83 | 1 | 0 | -5.203592 | -3.206360 | 3.663896  |
| 84 | 6 | 0 | -3.283521 | -2.326440 | -1.206897 |
| 85 | 6 | 0 | -3.591399 | -3.797871 | -1.560286 |
| 86 | 6 | 0 | -4.584986 | -1.571417 | -0.875184 |
| 87 | 1 | 0 | -2.834245 | -1.864442 | -2.096704 |
| 88 | 6 | 0 | -4.572323 | -3.863786 | -2.743615 |
| 89 | 1 | 0 | -4.038211 | -4.305409 | -0.699142 |
| 90 | 1 | 0 | -2.675892 | -4.341591 | -1.814409 |



|     |   |   |           |           |           |
|-----|---|---|-----------|-----------|-----------|
| 91  | 6 | 0 | -5.561237 | -1.637613 | -2.059193 |
| 92  | 1 | 0 | -5.056901 | -2.031544 | 0.001990  |
| 93  | 1 | 0 | -4.369236 | -0.530812 | -0.613751 |
| 94  | 6 | 0 | -5.865318 | -3.090773 | -2.448900 |
| 95  | 1 | 0 | -4.797366 | -4.911493 | -2.977536 |
| 96  | 1 | 0 | -4.089415 | -3.435798 | -3.633715 |
| 97  | 1 | 0 | -6.486580 | -1.103759 | -1.810225 |
| 98  | 1 | 0 | -5.115468 | -1.120046 | -2.918460 |
| 99  | 1 | 0 | -6.533031 | -3.120125 | -3.318607 |
| 100 | 1 | 0 | -6.398550 | -3.582513 | -1.622504 |
| 101 | 6 | 0 | -2.606528 | 2.414514  | 1.620881  |
| 102 | 6 | 0 | -2.245528 | 3.858592  | 2.019726  |
| 103 | 6 | 0 | -4.102692 | 2.128172  | 1.872239  |
| 104 | 1 | 0 | -2.033125 | 1.750299  | 2.275817  |
| 105 | 6 | 0 | -2.618557 | 4.113594  | 3.490369  |
| 106 | 1 | 0 | -2.772681 | 4.574982  | 1.376622  |
| 107 | 1 | 0 | -1.172450 | 4.034204  | 1.886189  |
| 108 | 6 | 0 | -4.449603 | 2.369393  | 3.349245  |
| 109 | 1 | 0 | -4.719846 | 2.789872  | 1.251952  |
| 110 | 1 | 0 | -4.352869 | 1.099892  | 1.591228  |
| 111 | 6 | 0 | -4.094696 | 3.801714  | 3.772155  |
| 112 | 1 | 0 | -2.389585 | 5.153359  | 3.754163  |
| 113 | 1 | 0 | -1.988681 | 3.478215  | 4.129304  |
| 114 | 1 | 0 | -5.515617 | 2.172816  | 3.516873  |
| 115 | 1 | 0 | -3.891929 | 1.654961  | 3.971290  |
| 116 | 1 | 0 | -4.317598 | 3.952747  | 4.835457  |
| 117 | 1 | 0 | -4.725987 | 4.506976  | 3.212450  |
| 118 | 6 | 0 | -3.465400 | 2.148165  | -1.237922 |
| 119 | 6 | 0 | -3.804682 | 3.646718  | -1.402660 |
| 120 | 6 | 0 | -3.256809 | 1.476406  | -2.608354 |

|     |    |   |           |           |           |
|-----|----|---|-----------|-----------|-----------|
| 121 | 1  | 0 | -4.318898 | 1.655840  | -0.756405 |
| 122 | 6  | 0 | -5.028043 | 3.839672  | -2.312125 |
| 123 | 1  | 0 | -2.949656 | 4.166428  | -1.853128 |
| 124 | 1  | 0 | -3.985630 | 4.112388  | -0.429387 |
| 125 | 6  | 0 | -4.474078 | 1.695567  | -3.520782 |
| 126 | 1  | 0 | -2.360075 | 1.882247  | -3.091863 |
| 127 | 1  | 0 | -3.081245 | 0.405716  | -2.475833 |
| 128 | 6  | 0 | -4.809349 | 3.183687  | -3.681162 |
| 129 | 1  | 0 | -5.236027 | 4.910570  | -2.425964 |
| 130 | 1  | 0 | -5.910202 | 3.393108  | -1.831324 |
| 131 | 1  | 0 | -4.287442 | 1.233644  | -4.498176 |
| 132 | 1  | 0 | -5.342436 | 1.180776  | -3.088196 |
| 133 | 1  | 0 | -5.698110 | 3.308388  | -4.311740 |
| 134 | 1  | 0 | -3.980272 | 3.690769  | -4.195564 |
| 135 | 6  | 0 | -0.451102 | -0.374926 | -3.114227 |
| 136 | 8  | 0 | 0.016885  | 0.651661  | -3.571988 |
| 137 | 8  | 0 | -0.674292 | -1.542417 | -3.394720 |
| 138 | 17 | 0 | -0.137519 | 0.018882  | 2.419248  |

-----  
<sup>2</sup>TS2 E(opt) = -3188.536360 hartree  
 -----

| Center<br>Number | Atomic<br>Number | Atomic<br>Type | Coordinates (Angstroms) |           |           |
|------------------|------------------|----------------|-------------------------|-----------|-----------|
|                  |                  |                | X                       | Y         | Z         |
| 1                | 77               | 0              | -0.762758               | -0.049738 | -0.188180 |
| 2                | 1                | 0              | -0.976614               | -0.159524 | -1.805126 |
| 3                | 15               | 0              | -1.950838               | -2.006921 | 0.091818  |
| 4                | 15               | 0              | -2.055463               | 1.857694  | -0.055060 |
| 5                | 6                | 0              | 2.092705                | -0.718394 | -0.105731 |
| 6                | 6                | 0              | 0.748264                | -2.674536 | -0.248772 |

|    |   |   |          |           |           |
|----|---|---|----------|-----------|-----------|
| 7  | 6 | 0 | 3.250571 | -1.496689 | -0.045235 |
| 8  | 6 | 0 | 1.879536 | -3.476035 | -0.170206 |
| 9  | 6 | 0 | 3.153833 | -2.890300 | -0.058710 |
| 10 | 1 | 0 | 4.224352 | -1.023686 | 0.007232  |
| 11 | 1 | 0 | 1.775199 | -4.554650 | -0.211324 |
| 12 | 6 | 0 | 2.056375 | 0.749303  | -0.133438 |
| 13 | 6 | 0 | 0.628326 | 2.631428  | -0.382915 |
| 14 | 6 | 0 | 3.172812 | 1.583529  | -0.064890 |
| 15 | 6 | 0 | 1.718242 | 3.488758  | -0.311257 |
| 16 | 6 | 0 | 3.014507 | 2.970067  | -0.135822 |
| 17 | 1 | 0 | 4.162781 | 1.158675  | 0.049457  |
| 18 | 1 | 0 | 1.564560 | 4.558087  | -0.404643 |
| 19 | 6 | 0 | 4.376011 | -3.743079 | 0.023474  |
| 20 | 6 | 0 | 4.922011 | -4.297834 | -1.151665 |
| 21 | 6 | 0 | 4.973958 | -3.987994 | 1.276168  |
| 22 | 6 | 0 | 6.067777 | -5.095262 | -1.051544 |
| 23 | 6 | 0 | 6.116784 | -4.793766 | 1.331975  |
| 24 | 6 | 0 | 6.677585 | -5.357976 | 0.180461  |
| 25 | 1 | 0 | 6.494819 | -5.518862 | -1.957963 |
| 26 | 1 | 0 | 6.579196 | -4.985219 | 2.297852  |
| 27 | 6 | 0 | 4.193981 | 3.878288  | -0.042374 |
| 28 | 6 | 0 | 5.103128 | 3.963272  | -1.117259 |
| 29 | 6 | 0 | 4.395052 | 4.643967  | 1.125663  |
| 30 | 6 | 0 | 6.202692 | 4.822170  | -1.004880 |
| 31 | 6 | 0 | 5.511649 | 5.483720  | 1.198470  |
| 32 | 6 | 0 | 6.425027 | 5.590086  | 0.143251  |
| 33 | 1 | 0 | 6.901514 | 4.892369  | -1.835552 |
| 34 | 1 | 0 | 5.673866 | 6.065554  | 2.103242  |
| 35 | 6 | 0 | 7.890797 | -6.251822 | 0.269009  |
| 36 | 1 | 0 | 7.595286 | -7.299104 | 0.414092  |

|    |   |   |           |           |           |
|----|---|---|-----------|-----------|-----------|
| 37 | 1 | 0 | 8.489315  | -6.207822 | -0.646428 |
| 38 | 1 | 0 | 8.531239  | -5.976217 | 1.112919  |
| 39 | 6 | 0 | 4.294199  | -4.027765 | -2.499121 |
| 40 | 1 | 0 | 3.275138  | -4.428021 | -2.554774 |
| 41 | 1 | 0 | 4.220938  | -2.951842 | -2.696696 |
| 42 | 1 | 0 | 4.878611  | -4.482057 | -3.303753 |
| 43 | 6 | 0 | 4.391642  | -3.399080 | 2.539920  |
| 44 | 1 | 0 | 4.423915  | -2.303424 | 2.523882  |
| 45 | 1 | 0 | 3.339459  | -3.681574 | 2.663591  |
| 46 | 1 | 0 | 4.940415  | -3.739320 | 3.422255  |
| 47 | 6 | 0 | 4.900549  | 3.155303  | -2.378640 |
| 48 | 1 | 0 | 5.041603  | 2.083346  | -2.198434 |
| 49 | 1 | 0 | 3.886409  | 3.277949  | -2.775453 |
| 50 | 1 | 0 | 5.608724  | 3.458732  | -3.154484 |
| 51 | 6 | 0 | 3.438663  | 4.551990  | 2.292519  |
| 52 | 1 | 0 | 2.453234  | 4.959635  | 2.038876  |
| 53 | 1 | 0 | 3.280643  | 3.511972  | 2.600409  |
| 54 | 1 | 0 | 3.818302  | 5.107889  | 3.154098  |
| 55 | 6 | 0 | 7.601600  | 6.531312  | 0.231940  |
| 56 | 1 | 0 | 8.429608  | 6.199940  | -0.402483 |
| 57 | 1 | 0 | 7.321359  | 7.540206  | -0.097817 |
| 58 | 1 | 0 | 7.968666  | 6.617869  | 1.259741  |
| 59 | 7 | 0 | 0.866954  | -1.324292 | -0.175385 |
| 60 | 7 | 0 | 0.804858  | 1.292907  | -0.249762 |
| 61 | 6 | 0 | -0.640392 | -3.208249 | -0.496463 |
| 62 | 6 | 0 | -0.777159 | 3.081674  | -0.679611 |
| 63 | 1 | 0 | -0.777441 | -3.295145 | -1.581920 |
| 64 | 1 | 0 | -0.767752 | -4.205910 | -0.068660 |
| 65 | 1 | 0 | -0.954803 | 4.103843  | -0.342300 |
| 66 | 1 | 0 | -0.902601 | 3.076934  | -1.770395 |

|    |   |   |           |           |           |
|----|---|---|-----------|-----------|-----------|
| 67 | 6 | 0 | -2.209320 | -2.516643 | 1.865011  |
| 68 | 6 | 0 | -2.849479 | -1.406148 | 2.719775  |
| 69 | 6 | 0 | -2.936430 | -3.857915 | 2.077137  |
| 70 | 1 | 0 | -1.168451 | -2.634690 | 2.206336  |
| 71 | 6 | 0 | -2.859182 | -1.795224 | 4.205604  |
| 72 | 1 | 0 | -3.879535 | -1.233980 | 2.385050  |
| 73 | 1 | 0 | -2.304966 | -0.467364 | 2.578681  |
| 74 | 6 | 0 | -2.932177 | -4.244641 | 3.565438  |
| 75 | 1 | 0 | -3.974675 | -3.759491 | 1.737969  |
| 76 | 1 | 0 | -2.474844 | -4.651682 | 1.479424  |
| 77 | 6 | 0 | -3.559010 | -3.142667 | 4.431196  |
| 78 | 1 | 0 | -3.348309 | -1.006298 | 4.789999  |
| 79 | 1 | 0 | -1.821898 | -1.860927 | 4.564713  |
| 80 | 1 | 0 | -3.469370 | -5.190922 | 3.702521  |
| 81 | 1 | 0 | -1.895854 | -4.417188 | 3.889267  |
| 82 | 1 | 0 | -3.517823 | -3.421123 | 5.491168  |
| 83 | 1 | 0 | -4.622550 | -3.043286 | 4.170300  |
| 84 | 6 | 0 | -3.429721 | -2.326662 | -0.973299 |
| 85 | 6 | 0 | -3.783041 | -3.794973 | -1.283765 |
| 86 | 6 | 0 | -4.660962 | -1.553437 | -0.460724 |
| 87 | 1 | 0 | -3.107800 | -1.860840 | -1.914386 |
| 88 | 6 | 0 | -4.927457 | -3.852693 | -2.310436 |
| 89 | 1 | 0 | -4.096290 | -4.310023 | -0.370020 |
| 90 | 1 | 0 | -2.909153 | -4.328591 | -1.673163 |
| 91 | 6 | 0 | -5.801418 | -1.621485 | -1.487017 |
| 92 | 1 | 0 | -4.998487 | -1.991860 | 0.486950  |
| 93 | 1 | 0 | -4.395668 | -0.510967 | -0.256295 |
| 94 | 6 | 0 | -6.160036 | -3.075115 | -1.826631 |
| 95 | 1 | 0 | -5.189813 | -4.898366 | -2.511769 |
| 96 | 1 | 0 | -4.578838 | -3.423535 | -3.260587 |

|     |   |   |           |           |           |
|-----|---|---|-----------|-----------|-----------|
| 97  | 1 | 0 | -6.679794 | -1.087855 | -1.103868 |
| 98  | 1 | 0 | -5.487123 | -1.102343 | -2.402591 |
| 99  | 1 | 0 | -6.949582 | -3.104132 | -2.587308 |
| 100 | 1 | 0 | -6.565510 | -3.565060 | -0.929637 |
| 101 | 6 | 0 | -2.492559 | 2.363792  | 1.697162  |
| 102 | 6 | 0 | -2.170693 | 3.818434  | 2.093620  |
| 103 | 6 | 0 | -3.950447 | 2.004084  | 2.052964  |
| 104 | 1 | 0 | -1.836488 | 1.715495  | 2.293326  |
| 105 | 6 | 0 | -2.451981 | 4.039159  | 3.590111  |
| 106 | 1 | 0 | -2.776716 | 4.513030  | 1.498534  |
| 107 | 1 | 0 | -1.119854 | 4.047944  | 1.887701  |
| 108 | 6 | 0 | -4.207272 | 2.214036  | 3.552468  |
| 109 | 1 | 0 | -4.632472 | 2.647703  | 1.483355  |
| 110 | 1 | 0 | -4.174652 | 0.970338  | 1.771478  |
| 111 | 6 | 0 | -3.889245 | 3.656965  | 3.968608  |
| 112 | 1 | 0 | -2.252271 | 5.085544  | 3.850790  |
| 113 | 1 | 0 | -1.750841 | 3.427205  | 4.175620  |
| 114 | 1 | 0 | -5.249690 | 1.967392  | 3.787385  |
| 115 | 1 | 0 | -3.578012 | 1.519327  | 4.126725  |
| 116 | 1 | 0 | -4.044345 | 3.786936  | 5.046504  |
| 117 | 1 | 0 | -4.588823 | 4.337948  | 3.462991  |
| 118 | 6 | 0 | -3.540094 | 2.175401  | -1.125720 |
| 119 | 6 | 0 | -3.906241 | 3.670035  | -1.245319 |
| 120 | 6 | 0 | -3.392819 | 1.520748  | -2.513963 |
| 121 | 1 | 0 | -4.360856 | 1.663732  | -0.608004 |
| 122 | 6 | 0 | -5.174017 | 3.858724  | -2.093493 |
| 123 | 1 | 0 | -3.078438 | 4.212561  | -1.719940 |
| 124 | 1 | 0 | -4.052259 | 4.109186  | -0.253637 |
| 125 | 6 | 0 | -4.658129 | 1.734204  | -3.359078 |
| 126 | 1 | 0 | -2.528889 | 1.951830  | -3.038915 |

|     |   |   |           |           |           |
|-----|---|---|-----------|-----------|-----------|
| 127 | 1 | 0 | -3.192418 | 0.451862  | -2.402611 |
| 128 | 6 | 0 | -5.019472 | 3.220357  | -3.479867 |
| 129 | 1 | 0 | -5.399314 | 4.928157  | -2.184799 |
| 130 | 1 | 0 | -6.025961 | 3.396957  | -1.574247 |
| 131 | 1 | 0 | -4.515483 | 1.289459  | -4.351600 |
| 132 | 1 | 0 | -5.494414 | 1.198709  | -2.888878 |
| 133 | 1 | 0 | -5.941722 | 3.342132  | -4.060787 |
| 134 | 1 | 0 | -4.224800 | 3.743381  | -4.031265 |
| 135 | 6 | 0 | -0.593853 | -0.610305 | -3.383820 |
| 136 | 8 | 0 | 0.322751  | 0.098810  | -3.685627 |
| 137 | 8 | 0 | -1.382089 | -1.480524 | -3.630503 |

-----  
<sup>2</sup>TS3 E(opt) = -3188.512287 hartree  
 -----

| Center<br>Number | Atomic<br>Number | Atomic<br>Type | Coordinates (Angstroms) |           |           |
|------------------|------------------|----------------|-------------------------|-----------|-----------|
|                  |                  |                | X                       | Y         | Z         |
| 1                | 77               | 0              | -0.751759               | -0.028440 | -0.112505 |
| 2                | 1                | 0              | -0.479472               | -1.107499 | -4.427613 |
| 3                | 15               | 0              | -1.940231               | -2.011851 | 0.127861  |
| 4                | 15               | 0              | -2.039712               | 1.904219  | -0.119434 |
| 5                | 6                | 0              | 2.105247                | -0.715044 | -0.009814 |
| 6                | 6                | 0              | 0.708080                | -2.663364 | -0.134246 |
| 7                | 6                | 0              | 3.256646                | -1.482421 | 0.041737  |
| 8                | 6                | 0              | 1.876306                | -3.469434 | -0.062897 |
| 9                | 6                | 0              | 3.133145                | -2.892997 | 0.029040  |
| 10               | 1                | 0              | 4.236752                | -1.022977 | 0.077426  |
| 11               | 1                | 0              | 1.770684                | -4.548910 | -0.091245 |
| 12               | 6                | 0              | 2.075571                | 0.767043  | -0.075245 |
| 13               | 6                | 0              | 0.665014                | 2.641562  | -0.421016 |

|    |   |   |          |           |           |
|----|---|---|----------|-----------|-----------|
| 14 | 6 | 0 | 3.195456 | 1.590720  | -0.026101 |
| 15 | 6 | 0 | 1.763445 | 3.498447  | -0.371817 |
| 16 | 6 | 0 | 3.047061 | 2.978070  | -0.162133 |
| 17 | 1 | 0 | 4.181110 | 1.165398  | 0.118257  |
| 18 | 1 | 0 | 1.618977 | 4.563837  | -0.512578 |
| 19 | 6 | 0 | 4.356024 | -3.748537 | 0.100861  |
| 20 | 6 | 0 | 4.911468 | -4.276591 | -1.080687 |
| 21 | 6 | 0 | 4.947045 | -4.020127 | 1.352212  |
| 22 | 6 | 0 | 6.056760 | -5.077949 | -0.989976 |
| 23 | 6 | 0 | 6.088725 | -4.826659 | 1.399353  |
| 24 | 6 | 0 | 6.657631 | -5.367243 | 0.239378  |
| 25 | 1 | 0 | 6.488638 | -5.483486 | -1.902315 |
| 26 | 1 | 0 | 6.544775 | -5.038994 | 2.364117  |
| 27 | 6 | 0 | 4.237556 | 3.875273  | -0.106009 |
| 28 | 6 | 0 | 5.135574 | 3.914207  | -1.194730 |
| 29 | 6 | 0 | 4.459773 | 4.671457  | 1.034507  |
| 30 | 6 | 0 | 6.245438 | 4.760612  | -1.120817 |
| 31 | 6 | 0 | 5.589242 | 5.499504  | 1.069134  |
| 32 | 6 | 0 | 6.490790 | 5.560799  | 0.002481  |
| 33 | 1 | 0 | 6.936395 | 4.796683  | -1.960486 |
| 34 | 1 | 0 | 5.767608 | 6.107600  | 1.953057  |
| 35 | 6 | 0 | 7.874810 | -6.256434 | 0.324053  |
| 36 | 1 | 0 | 7.600648 | -7.266088 | 0.655729  |
| 37 | 1 | 0 | 8.371473 | -6.352396 | -0.646246 |
| 38 | 1 | 0 | 8.602834 | -5.869018 | 1.045084  |
| 39 | 6 | 0 | 4.291721 | -3.980566 | -2.426637 |
| 40 | 1 | 0 | 3.276477 | -4.387487 | -2.498327 |
| 41 | 1 | 0 | 4.210383 | -2.900912 | -2.599399 |
| 42 | 1 | 0 | 4.886091 | -4.410742 | -3.237358 |
| 43 | 6 | 0 | 4.353620 | -3.458115 | 2.622901  |



|    |   |   |           |           |           |
|----|---|---|-----------|-----------|-----------|
| 44 | 1 | 0 | 4.350444  | -2.361891 | 2.612697  |
| 45 | 1 | 0 | 3.311269  | -3.774300 | 2.748339  |
| 46 | 1 | 0 | 4.916469  | -3.786623 | 3.500864  |
| 47 | 6 | 0 | 4.904660  | 3.069494  | -2.426611 |
| 48 | 1 | 0 | 5.012324  | 2.000639  | -2.208488 |
| 49 | 1 | 0 | 3.893598  | 3.210255  | -2.825612 |
| 50 | 1 | 0 | 5.619511  | 3.323124  | -3.213985 |
| 51 | 6 | 0 | 3.513661  | 4.628518  | 2.212322  |
| 52 | 1 | 0 | 2.527551  | 5.029774  | 1.951269  |
| 53 | 1 | 0 | 3.355088  | 3.601780  | 2.561913  |
| 54 | 1 | 0 | 3.902883  | 5.215629  | 3.048434  |
| 55 | 6 | 0 | 7.688841  | 6.478098  | 0.038946  |
| 56 | 1 | 0 | 8.600900  | 5.954252  | -0.268042 |
| 57 | 1 | 0 | 7.557925  | 7.320990  | -0.651528 |
| 58 | 1 | 0 | 7.849903  | 6.889900  | 1.039382  |
| 59 | 7 | 0 | 0.878119  | -1.306275 | -0.065197 |
| 60 | 7 | 0 | 0.837038  | 1.314898  | -0.236503 |
| 61 | 6 | 0 | -0.620937 | -3.142267 | -0.377149 |
| 62 | 6 | 0 | -0.732678 | 3.093857  | -0.756395 |
| 63 | 1 | 0 | -0.633499 | -2.752585 | -1.955915 |
| 64 | 1 | 0 | -0.778631 | -4.214240 | -0.268888 |
| 65 | 1 | 0 | -0.905802 | 4.125636  | -0.446767 |
| 66 | 1 | 0 | -0.835036 | 3.069735  | -1.848974 |
| 67 | 6 | 0 | -2.359861 | -2.413071 | 1.904001  |
| 68 | 6 | 0 | -3.088904 | -1.276820 | 2.645810  |
| 69 | 6 | 0 | -3.068531 | -3.762665 | 2.121737  |
| 70 | 1 | 0 | -1.350543 | -2.490092 | 2.337328  |
| 71 | 6 | 0 | -3.225175 | -1.596472 | 4.142500  |
| 72 | 1 | 0 | -4.087343 | -1.133007 | 2.216614  |
| 73 | 1 | 0 | -2.543657 | -0.338048 | 2.509360  |

|     |   |   |           |           |           |
|-----|---|---|-----------|-----------|-----------|
| 74  | 6 | 0 | -3.193605 | -4.075249 | 3.622093  |
| 75  | 1 | 0 | -4.073079 | -3.717731 | 1.683723  |
| 76  | 1 | 0 | -2.528035 | -4.567791 | 1.610349  |
| 77  | 6 | 0 | -3.918964 | -2.946965 | 4.369309  |
| 78  | 1 | 0 | -3.777634 | -0.792084 | 4.643675  |
| 79  | 1 | 0 | -2.223338 | -1.624197 | 4.595126  |
| 80  | 1 | 0 | -3.721761 | -5.026628 | 3.760161  |
| 81  | 1 | 0 | -2.188122 | -4.204916 | 4.047457  |
| 82  | 1 | 0 | -3.972707 | -3.172643 | 5.441295  |
| 83  | 1 | 0 | -4.955015 | -2.884255 | 4.006090  |
| 84  | 6 | 0 | -3.378167 | -2.314843 | -1.005878 |
| 85  | 6 | 0 | -3.692012 | -3.789043 | -1.331045 |
| 86  | 6 | 0 | -4.647507 | -1.560184 | -0.567636 |
| 87  | 1 | 0 | -3.025246 | -1.844652 | -1.934735 |
| 88  | 6 | 0 | -4.780171 | -3.875083 | -2.414157 |
| 89  | 1 | 0 | -4.041590 | -4.304297 | -0.429797 |
| 90  | 1 | 0 | -2.787574 | -4.306095 | -1.668361 |
| 91  | 6 | 0 | -5.729812 | -1.653294 | -1.653858 |
| 92  | 1 | 0 | -5.031642 | -1.999695 | 0.361234  |
| 93  | 1 | 0 | -4.412297 | -0.511750 | -0.354349 |
| 94  | 6 | 0 | -6.048418 | -3.114508 | -2.001121 |
| 95  | 1 | 0 | -5.014625 | -4.926380 | -2.621150 |
| 96  | 1 | 0 | -4.389445 | -3.446714 | -3.348463 |
| 97  | 1 | 0 | -6.635688 | -1.129991 | -1.323953 |
| 98  | 1 | 0 | -5.374730 | -1.136921 | -2.555934 |
| 99  | 1 | 0 | -6.797151 | -3.160702 | -2.801317 |
| 100 | 1 | 0 | -6.492388 | -3.605025 | -1.122820 |
| 101 | 6 | 0 | -2.494097 | 2.476614  | 1.608087  |
| 102 | 6 | 0 | -2.130637 | 3.930398  | 1.969181  |
| 103 | 6 | 0 | -3.972622 | 2.181533  | 1.939431  |

|     |   |   |           |          |           |
|-----|---|---|-----------|----------|-----------|
| 104 | 1 | 0 | -1.877171 | 1.823937 | 2.240763  |
| 105 | 6 | 0 | -2.437477 | 4.207081 | 3.451239  |
| 106 | 1 | 0 | -2.699312 | 4.625796 | 1.338898  |
| 107 | 1 | 0 | -1.068121 | 4.118239 | 1.781122  |
| 108 | 6 | 0 | -4.254799 | 2.444077 | 3.425959  |
| 109 | 1 | 0 | -4.616844 | 2.833506 | 1.336660  |
| 110 | 1 | 0 | -4.230037 | 1.149809 | 1.681117  |
| 111 | 6 | 0 | -3.895457 | 3.886701 | 3.807444  |
| 112 | 1 | 0 | -2.206814 | 5.253539 | 3.684577  |
| 113 | 1 | 0 | -1.771588 | 3.589730 | 4.071208  |
| 114 | 1 | 0 | -5.310191 | 2.240517 | 3.643565  |
| 115 | 1 | 0 | -3.663306 | 1.745403 | 4.034452  |
| 116 | 1 | 0 | -4.069452 | 4.054202 | 4.877233  |
| 117 | 1 | 0 | -4.559051 | 4.576144 | 3.266082  |
| 118 | 6 | 0 | -3.498916 | 2.203521 | -1.224598 |
| 119 | 6 | 0 | -3.851135 | 3.694569 | -1.407015 |
| 120 | 6 | 0 | -3.325412 | 1.500749 | -2.585774 |
| 121 | 1 | 0 | -4.331883 | 1.713850 | -0.704579 |
| 122 | 6 | 0 | -5.106795 | 3.855676 | -2.278816 |
| 123 | 1 | 0 | -3.013048 | 4.210148 | -1.893694 |
| 124 | 1 | 0 | -4.004243 | 4.175926 | -0.436081 |
| 125 | 6 | 0 | -4.580767 | 1.679308 | -3.453622 |
| 126 | 1 | 0 | -2.458772 | 1.923092 | -3.111187 |
| 127 | 1 | 0 | -3.110859 | 0.438859 | -2.436309 |
| 128 | 6 | 0 | -4.938341 | 3.160500 | -3.636393 |
| 129 | 1 | 0 | -5.325179 | 4.921519 | -2.416973 |
| 130 | 1 | 0 | -5.967815 | 3.419812 | -1.752263 |
| 131 | 1 | 0 | -4.427846 | 1.197232 | -4.427051 |
| 132 | 1 | 0 | -5.423453 | 1.163429 | -2.973270 |
| 133 | 1 | 0 | -5.854029 | 3.260677 | -4.231681 |

|     |   |   |           |           |           |
|-----|---|---|-----------|-----------|-----------|
| 134 | 1 | 0 | -4.136871 | 3.659834  | -4.199782 |
| 135 | 6 | 0 | -0.546482 | -1.265252 | -3.339011 |
| 136 | 8 | 0 | -0.560113 | -0.285241 | -2.586559 |
| 137 | 8 | 0 | -0.602394 | -2.525740 | -3.023916 |

-----  
**<sup>1</sup>TS4 E(opt) = -3188.638938 hartree**  
 -----

| Center<br>Number | Atomic<br>Number | Atomic<br>Type | Coordinates (Angstroms) |           |           |
|------------------|------------------|----------------|-------------------------|-----------|-----------|
|                  |                  |                | X                       | Y         | Z         |
| 1                | 77               | 0              | -0.759115               | -0.064183 | -0.393144 |
| 2                | 1                | 0              | -1.239718               | -0.352404 | -1.949525 |
| 3                | 15               | 0              | -1.889536               | -1.989253 | 0.161570  |
| 4                | 15               | 0              | -2.041979               | 1.834082  | -0.132857 |
| 5                | 6                | 0              | 2.109918                | -0.676347 | -0.265278 |
| 6                | 6                | 0              | 0.772725                | -2.669272 | -0.269413 |
| 7                | 6                | 0              | 3.276407                | -1.471395 | -0.177469 |
| 8                | 6                | 0              | 1.898657                | -3.453400 | -0.167676 |
| 9                | 6                | 0              | 3.189926                | -2.848815 | -0.110809 |
| 10               | 1                | 0              | 4.248997                | -0.990452 | -0.168449 |
| 11               | 1                | 0              | 1.802923                | -4.534012 | -0.155666 |
| 12               | 6                | 0              | 2.060911                | 0.751559  | -0.317229 |
| 13               | 6                | 0              | 0.600362                | 2.644104  | -0.519776 |
| 14               | 6                | 0              | 3.165996                | 1.628077  | -0.224030 |
| 15               | 6                | 0              | 1.665612                | 3.504966  | -0.428645 |
| 16               | 6                | 0              | 2.991822                | 2.999012  | -0.249720 |
| 17               | 1                | 0              | 4.161936                | 1.212890  | -0.114036 |
| 18               | 1                | 0              | 1.499237                | 4.573530  | -0.513956 |
| 19               | 6                | 0              | 4.412661                | -3.699881 | -0.006659 |
| 20               | 6                | 0              | 4.960715                | -4.287863 | -1.165745 |

|    |   |   |          |           |           |
|----|---|---|----------|-----------|-----------|
| 21 | 6 | 0 | 5.014443 | -3.919186 | 1.249491  |
| 22 | 6 | 0 | 6.106096 | -5.084008 | -1.048786 |
| 23 | 6 | 0 | 6.158311 | -4.723173 | 1.325370  |
| 24 | 6 | 0 | 6.718582 | -5.315872 | 0.188235  |
| 25 | 1 | 0 | 6.531388 | -5.531313 | -1.944921 |
| 26 | 1 | 0 | 6.622065 | -4.890523 | 2.295355  |
| 27 | 6 | 0 | 4.141636 | 3.937280  | -0.105505 |
| 28 | 6 | 0 | 5.132043 | 4.017932  | -1.109000 |
| 29 | 6 | 0 | 4.238648 | 4.756950  | 1.043024  |
| 30 | 6 | 0 | 6.196178 | 4.914686  | -0.947690 |
| 31 | 6 | 0 | 5.319553 | 5.636402  | 1.165831  |
| 32 | 6 | 0 | 6.307909 | 5.734594  | 0.179440  |
| 33 | 1 | 0 | 6.953871 | 4.976590  | -1.726208 |
| 34 | 1 | 0 | 5.395140 | 6.256503  | 2.056913  |
| 35 | 6 | 0 | 7.932544 | -6.207223 | 0.296305  |
| 36 | 1 | 0 | 7.639012 | -7.255012 | 0.442511  |
| 37 | 1 | 0 | 8.542469 | -6.166385 | -0.611976 |
| 38 | 1 | 0 | 8.562807 | -5.925904 | 1.146046  |
| 39 | 6 | 0 | 4.331130 | -4.051566 | -2.518830 |
| 40 | 1 | 0 | 3.298571 | -4.418440 | -2.549870 |
| 41 | 1 | 0 | 4.289696 | -2.982150 | -2.756500 |
| 42 | 1 | 0 | 4.893156 | -4.555001 | -3.310462 |
| 43 | 6 | 0 | 4.436357 | -3.297616 | 2.499801  |
| 44 | 1 | 0 | 4.488271 | -2.203333 | 2.463812  |
| 45 | 1 | 0 | 3.378047 | -3.556804 | 2.621040  |
| 46 | 1 | 0 | 4.973250 | -3.632083 | 3.392031  |
| 47 | 6 | 0 | 5.061231 | 3.164972  | -2.355982 |
| 48 | 1 | 0 | 5.309728 | 2.118297  | -2.146374 |
| 49 | 1 | 0 | 4.055458 | 3.168244  | -2.789516 |
| 50 | 1 | 0 | 5.762353 | 3.525583  | -3.114341 |

|    |   |   |           |           |           |
|----|---|---|-----------|-----------|-----------|
| 51 | 6 | 0 | 3.210499  | 4.677339  | 2.149028  |
| 52 | 1 | 0 | 2.244709  | 5.091184  | 1.836902  |
| 53 | 1 | 0 | 3.024659  | 3.639643  | 2.448274  |
| 54 | 1 | 0 | 3.541082  | 5.233561  | 3.030880  |
| 55 | 6 | 0 | 7.444656  | 6.718111  | 0.319792  |
| 56 | 1 | 0 | 8.311114  | 6.419386  | -0.278484 |
| 57 | 1 | 0 | 7.143504  | 7.718515  | -0.017685 |
| 58 | 1 | 0 | 7.764629  | 6.813954  | 1.362790  |
| 59 | 7 | 0 | 0.864697  | -1.298343 | -0.267821 |
| 60 | 7 | 0 | 0.773770  | 1.282744  | -0.396188 |
| 61 | 6 | 0 | -0.620712 | -3.218087 | -0.454129 |
| 62 | 6 | 0 | -0.813423 | 3.073038  | -0.811534 |
| 63 | 1 | 0 | -0.812452 | -3.317708 | -1.532045 |
| 64 | 1 | 0 | -0.727241 | -4.209742 | -0.006841 |
| 65 | 1 | 0 | -1.002359 | 4.102155  | -0.501378 |
| 66 | 1 | 0 | -0.967902 | 3.024803  | -1.898574 |
| 67 | 6 | 0 | -2.001991 | -2.423821 | 1.977015  |
| 68 | 6 | 0 | -2.601661 | -1.296822 | 2.836472  |
| 69 | 6 | 0 | -2.662422 | -3.772678 | 2.320230  |
| 70 | 1 | 0 | -0.933253 | -2.495083 | 2.235550  |
| 71 | 6 | 0 | -2.453503 | -1.608872 | 4.333192  |
| 72 | 1 | 0 | -3.665464 | -1.177598 | 2.596719  |
| 73 | 1 | 0 | -2.110401 | -0.349890 | 2.596046  |
| 74 | 6 | 0 | -2.502355 | -4.088578 | 3.817041  |
| 75 | 1 | 0 | -3.731804 | -3.719151 | 2.081868  |
| 76 | 1 | 0 | -2.237720 | -4.583674 | 1.718205  |
| 77 | 6 | 0 | -3.078086 | -2.964960 | 4.690520  |
| 78 | 1 | 0 | -2.912055 | -0.808326 | 4.926733  |
| 79 | 1 | 0 | -1.384412 | -1.622945 | 4.590599  |
| 80 | 1 | 0 | -2.992028 | -5.042286 | 4.049626  |

|     |   |   |           |           |           |
|-----|---|---|-----------|-----------|-----------|
| 81  | 1 | 0 | -1.434299 | -4.215797 | 4.044786  |
| 82  | 1 | 0 | -2.922433 | -3.189774 | 5.752803  |
| 83  | 1 | 0 | -4.165297 | -2.911526 | 4.533958  |
| 84  | 6 | 0 | -3.459900 | -2.405512 | -0.736295 |
| 85  | 6 | 0 | -3.819629 | -3.891515 | -0.931219 |
| 86  | 6 | 0 | -4.654322 | -1.616887 | -0.162953 |
| 87  | 1 | 0 | -3.240275 | -1.990969 | -1.728460 |
| 88  | 6 | 0 | -5.046873 | -4.019362 | -1.851143 |
| 89  | 1 | 0 | -4.047405 | -4.357570 | 0.032771  |
| 90  | 1 | 0 | -2.973664 | -4.438867 | -1.362225 |
| 91  | 6 | 0 | -5.877436 | -1.748855 | -1.082478 |
| 92  | 1 | 0 | -4.906705 | -2.006068 | 0.831965  |
| 93  | 1 | 0 | -4.386590 | -0.562296 | -0.036689 |
| 94  | 6 | 0 | -6.243986 | -3.222533 | -1.311474 |
| 95  | 1 | 0 | -5.314525 | -5.076780 | -1.967656 |
| 96  | 1 | 0 | -4.786358 | -3.646064 | -2.851655 |
| 97  | 1 | 0 | -6.728301 | -1.204575 | -0.654226 |
| 98  | 1 | 0 | -5.650134 | -1.275329 | -2.047942 |
| 99  | 1 | 0 | -7.093685 | -3.301154 | -2.000719 |
| 100 | 1 | 0 | -6.568251 | -3.663400 | -0.357633 |
| 101 | 6 | 0 | -2.395068 | 2.356507  | 1.642718  |
| 102 | 6 | 0 | -2.045754 | 3.810731  | 2.020167  |
| 103 | 6 | 0 | -3.828758 | 2.004229  | 2.089353  |
| 104 | 1 | 0 | -1.706542 | 1.711387  | 2.203070  |
| 105 | 6 | 0 | -2.235026 | 4.034037  | 3.530978  |
| 106 | 1 | 0 | -2.683102 | 4.509708  | 1.464031  |
| 107 | 1 | 0 | -1.008492 | 4.036156  | 1.750972  |
| 108 | 6 | 0 | -3.995166 | 2.215111  | 3.601395  |
| 109 | 1 | 0 | -4.543518 | 2.649199  | 1.562643  |
| 110 | 1 | 0 | -4.074141 | 0.971160  | 1.822812  |

|     |   |   |           |           |           |
|-----|---|---|-----------|-----------|-----------|
| 111 | 6 | 0 | -3.647986 | 3.657029  | 3.996925  |
| 112 | 1 | 0 | -2.016108 | 5.079695  | 3.779958  |
| 113 | 1 | 0 | -1.502099 | 3.419351  | 4.073210  |
| 114 | 1 | 0 | -5.022026 | 1.971547  | 3.900702  |
| 115 | 1 | 0 | -3.333926 | 1.519552  | 4.136967  |
| 116 | 1 | 0 | -3.736913 | 3.788283  | 5.082334  |
| 117 | 1 | 0 | -4.374818 | 4.340454  | 3.534538  |
| 118 | 6 | 0 | -3.607950 | 2.171849  | -1.088260 |
| 119 | 6 | 0 | -3.984597 | 3.664363  | -1.186687 |
| 120 | 6 | 0 | -3.583857 | 1.515730  | -2.481354 |
| 121 | 1 | 0 | -4.387058 | 1.662630  | -0.506346 |
| 122 | 6 | 0 | -5.326438 | 3.847644  | -1.914790 |
| 123 | 1 | 0 | -3.202372 | 4.200719  | -1.740304 |
| 124 | 1 | 0 | -4.038686 | 4.115669  | -0.191261 |
| 125 | 6 | 0 | -4.923282 | 1.712801  | -3.207432 |
| 126 | 1 | 0 | -2.775858 | 1.955072  | -3.083848 |
| 127 | 1 | 0 | -3.359108 | 0.450669  | -2.390828 |
| 128 | 6 | 0 | -5.305974 | 3.195630  | -3.303670 |
| 129 | 1 | 0 | -5.561016 | 4.916220  | -1.995466 |
| 130 | 1 | 0 | -6.125566 | 3.391702  | -1.312633 |
| 131 | 1 | 0 | -4.870810 | 1.263184  | -4.206910 |
| 132 | 1 | 0 | -5.707926 | 1.172407  | -2.658513 |
| 133 | 1 | 0 | -6.281424 | 3.308646  | -3.792623 |
| 134 | 1 | 0 | -4.572186 | 3.717268  | -3.935167 |
| 135 | 6 | 0 | -1.078724 | -1.049956 | -3.618944 |
| 136 | 8 | 0 | 0.061673  | -0.858502 | -3.908161 |
| 137 | 8 | 0 | -2.190205 | -1.435254 | -3.823387 |

---

**<sup>1</sup>TS5 E(opt) = -3264.409039 hartree**

---



| Center<br>Number | Atomic<br>Number | Atomic<br>Type | Coordinates (Angstroms) |           |           |
|------------------|------------------|----------------|-------------------------|-----------|-----------|
|                  |                  |                | X                       | Y         | Z         |
| 1                | 77               | 0              | -0.868972               | 0.015761  | -0.591282 |
| 2                | 15               | 0              | -2.062581               | -1.940067 | -0.374534 |
| 3                | 15               | 0              | -2.108323               | 1.907879  | -0.148423 |
| 4                | 6                | 0              | 1.965611                | -0.678843 | -0.769736 |
| 5                | 6                | 0              | 0.598952                | -2.601079 | -0.940498 |
| 6                | 6                | 0              | 3.107153                | -1.464787 | -0.681285 |
| 7                | 6                | 0              | 1.719727                | -3.423558 | -0.844220 |
| 8                | 6                | 0              | 2.991757                | -2.861919 | -0.688443 |
| 9                | 1                | 0              | 4.082069                | -1.005377 | -0.573150 |
| 10               | 1                | 0              | 1.593329                | -4.500285 | -0.856734 |
| 11               | 6                | 0              | 1.953116                | 0.799366  | -0.700771 |
| 12               | 6                | 0              | 0.542615                | 2.698852  | -0.646883 |
| 13               | 6                | 0              | 3.083325                | 1.603130  | -0.598277 |
| 14               | 6                | 0              | 1.649852                | 3.536954  | -0.532620 |
| 15               | 6                | 0              | 2.941387                | 2.995243  | -0.506684 |
| 16               | 1                | 0              | 4.071271                | 1.159864  | -0.575693 |
| 17               | 1                | 0              | 1.503492                | 4.609568  | -0.474126 |
| 18               | 6                | 0              | 4.193231                | -3.717485 | -0.472457 |
| 19               | 6                | 0              | 4.695361                | -4.524098 | -1.514728 |
| 20               | 6                | 0              | 4.819351                | -3.709806 | 0.793434  |
| 21               | 6                | 0              | 5.826650                | -5.311317 | -1.272458 |
| 22               | 6                | 0              | 5.942693                | -4.519926 | 0.992731  |
| 23               | 6                | 0              | 6.461759                | -5.327106 | -0.025567 |
| 24               | 1                | 0              | 6.222362                | -5.925180 | -2.078584 |
| 25               | 1                | 0              | 6.422584                | -4.521211 | 1.969083  |
| 26               | 6                | 0              | 4.137205                | 3.876992  | -0.383072 |
| 27               | 6                | 0              | 5.018962                | 4.022161  | -1.475284 |

|    |   |   |          |           |           |
|----|---|---|----------|-----------|-----------|
| 28 | 6 | 0 | 4.379310 | 4.560300  | 0.827763  |
| 29 | 6 | 0 | 6.130686 | 4.860446  | -1.336915 |
| 30 | 6 | 0 | 5.508243 | 5.381478  | 0.923618  |
| 31 | 6 | 0 | 6.392816 | 5.549208  | -0.147557 |
| 32 | 1 | 0 | 6.807705 | 4.978365  | -2.180111 |
| 33 | 1 | 0 | 5.702746 | 5.899733  | 1.860012  |
| 34 | 6 | 0 | 7.656643 | -6.214520 | 0.224828  |
| 35 | 1 | 0 | 7.342958 | -7.191044 | 0.616184  |
| 36 | 1 | 0 | 8.219395 | -6.399148 | -0.695624 |
| 37 | 1 | 0 | 8.335901 | -5.773873 | 0.961626  |
| 38 | 6 | 0 | 4.046380 | -4.533239 | -2.879904 |
| 39 | 1 | 0 | 3.060243 | -5.010853 | -2.854199 |
| 40 | 1 | 0 | 3.896793 | -3.516792 | -3.260971 |
| 41 | 1 | 0 | 4.660994 | -5.079305 | -3.600809 |
| 42 | 6 | 0 | 4.293774 | -2.855512 | 1.926769  |
| 43 | 1 | 0 | 4.564608 | -1.801298 | 1.790730  |
| 44 | 1 | 0 | 3.201656 | -2.895492 | 1.991085  |
| 45 | 1 | 0 | 4.713925 | -3.181497 | 2.882750  |
| 46 | 6 | 0 | 4.776393 | 3.304182  | -2.783557 |
| 47 | 1 | 0 | 4.948081 | 2.225564  | -2.690456 |
| 48 | 1 | 0 | 3.744668 | 3.432751  | -3.129181 |
| 49 | 1 | 0 | 5.445032 | 3.679950  | -3.562855 |
| 50 | 6 | 0 | 3.457655 | 4.403800  | 2.016124  |
| 51 | 1 | 0 | 2.489868 | 4.888464  | 1.843043  |
| 52 | 1 | 0 | 3.249724 | 3.349327  | 2.229387  |
| 53 | 1 | 0 | 3.897698 | 4.852072  | 2.911059  |
| 54 | 6 | 0 | 7.581053 | 6.472615  | -0.034099 |
| 55 | 1 | 0 | 8.408002 | 6.142172  | -0.670627 |
| 56 | 1 | 0 | 7.315787 | 7.490493  | -0.348321 |
| 57 | 1 | 0 | 7.943282 | 6.535535  | 0.996872  |

|    |   |   |           |           |           |
|----|---|---|-----------|-----------|-----------|
| 58 | 7 | 0 | 0.737266  | -1.259663 | -0.877081 |
| 59 | 7 | 0 | 0.712383  | 1.360752  | -0.716382 |
| 60 | 6 | 0 | -0.804161 | -3.119731 | -1.118407 |
| 61 | 6 | 0 | -0.873802 | 3.193112  | -0.752377 |
| 62 | 1 | 0 | -1.021979 | -3.166607 | -2.193001 |
| 63 | 1 | 0 | -0.904089 | -4.133458 | -0.722955 |
| 64 | 1 | 0 | -0.996169 | 4.166855  | -0.276260 |
| 65 | 1 | 0 | -1.103144 | 3.329029  | -1.816777 |
| 66 | 6 | 0 | -2.239144 | -2.567416 | 1.365064  |
| 67 | 6 | 0 | -2.861130 | -1.537990 | 2.327782  |
| 68 | 6 | 0 | -2.910642 | -3.942998 | 1.532947  |
| 69 | 1 | 0 | -1.180050 | -2.654563 | 1.643824  |
| 70 | 6 | 0 | -2.727783 | -2.019538 | 3.780427  |
| 71 | 1 | 0 | -3.921905 | -1.390781 | 2.090101  |
| 72 | 1 | 0 | -2.359545 | -0.576461 | 2.213438  |
| 73 | 6 | 0 | -2.774352 | -4.425571 | 2.987607  |
| 74 | 1 | 0 | -3.975672 | -3.863199 | 1.281847  |
| 75 | 1 | 0 | -2.473296 | -4.682848 | 0.853030  |
| 76 | 6 | 0 | -3.357740 | -3.405470 | 3.975820  |
| 77 | 1 | 0 | -3.190093 | -1.289896 | 4.456947  |
| 78 | 1 | 0 | -1.660158 | -2.062836 | 4.038982  |
| 79 | 1 | 0 | -3.270713 | -5.396853 | 3.104117  |
| 80 | 1 | 0 | -1.710192 | -4.582905 | 3.213863  |
| 81 | 1 | 0 | -3.213720 | -3.750079 | 5.007238  |
| 82 | 1 | 0 | -4.443240 | -3.332005 | 3.815186  |
| 83 | 6 | 0 | -3.601074 | -2.197142 | -1.384373 |
| 84 | 6 | 0 | -3.959903 | -3.647955 | -1.766971 |
| 85 | 6 | 0 | -4.807829 | -1.483266 | -0.742315 |
| 86 | 1 | 0 | -3.351098 | -1.662832 | -2.313427 |
| 87 | 6 | 0 | -5.174453 | -3.663778 | -2.710960 |

|     |   |   |           |           |           |
|-----|---|---|-----------|-----------|-----------|
| 88  | 1 | 0 | -4.200396 | -4.223089 | -0.867225 |
| 89  | 1 | 0 | -3.110650 | -4.143482 | -2.249403 |
| 90  | 6 | 0 | -6.018513 | -1.506961 | -1.686900 |
| 91  | 1 | 0 | -5.070925 | -1.993358 | 0.192955  |
| 92  | 1 | 0 | -4.547272 | -0.452115 | -0.481911 |
| 93  | 6 | 0 | -6.380384 | -2.942702 | -2.092182 |
| 94  | 1 | 0 | -5.434263 | -4.700035 | -2.958974 |
| 95  | 1 | 0 | -4.902364 | -3.169601 | -3.654643 |
| 96  | 1 | 0 | -6.873626 | -1.015104 | -1.207411 |
| 97  | 1 | 0 | -5.780724 | -0.925366 | -2.587985 |
| 98  | 1 | 0 | -7.222586 | -2.939335 | -2.794703 |
| 99  | 1 | 0 | -6.712137 | -3.495580 | -1.201571 |
| 100 | 6 | 0 | -2.452088 | 2.264521  | 1.655796  |
| 101 | 6 | 0 | -2.077395 | 3.673760  | 2.154617  |
| 102 | 6 | 0 | -3.904567 | 1.912923  | 2.041725  |
| 103 | 1 | 0 | -1.789264 | 1.556697  | 2.165726  |
| 104 | 6 | 0 | -2.288057 | 3.773685  | 3.675410  |
| 105 | 1 | 0 | -2.689143 | 4.429675  | 1.645394  |
| 106 | 1 | 0 | -1.029726 | 3.894903  | 1.923375  |
| 107 | 6 | 0 | -4.087587 | 1.995268  | 3.564160  |
| 108 | 1 | 0 | -4.592627 | 2.621059  | 1.563419  |
| 109 | 1 | 0 | -4.170629 | 0.914186  | 1.681672  |
| 110 | 6 | 0 | -3.715768 | 3.389784  | 4.087126  |
| 111 | 1 | 0 | -2.051898 | 4.790066  | 4.013242  |
| 112 | 1 | 0 | -1.576608 | 3.100267  | 4.174364  |
| 113 | 1 | 0 | -5.123765 | 1.750114  | 3.826952  |
| 114 | 1 | 0 | -3.448928 | 1.240711  | 4.044559  |
| 115 | 1 | 0 | -3.818366 | 3.428874  | 5.178379  |
| 116 | 1 | 0 | -4.420939 | 4.126210  | 3.675516  |
| 117 | 6 | 0 | -3.642322 | 2.297382  | -1.120220 |

|     |   |   |           |           |           |
|-----|---|---|-----------|-----------|-----------|
| 118 | 6 | 0 | -4.043603 | 3.786171  | -1.122000 |
| 119 | 6 | 0 | -3.527869 | 1.747392  | -2.557130 |
| 120 | 1 | 0 | -4.433688 | 1.730231  | -0.614873 |
| 121 | 6 | 0 | -5.349538 | 3.997328  | -1.905505 |
| 122 | 1 | 0 | -3.247661 | 4.379192  | -1.591166 |
| 123 | 1 | 0 | -4.156396 | 4.154483  | -0.097325 |
| 124 | 6 | 0 | -4.834097 | 1.973243  | -3.334229 |
| 125 | 1 | 0 | -2.705353 | 2.251751  | -3.083512 |
| 126 | 1 | 0 | -3.282646 | 0.679563  | -2.528669 |
| 127 | 6 | 0 | -5.239804 | 3.453479  | -3.336676 |
| 128 | 1 | 0 | -5.603716 | 5.064071  | -1.919001 |
| 129 | 1 | 0 | -6.168278 | 3.481585  | -1.383715 |
| 130 | 1 | 0 | -4.723869 | 1.602422  | -4.360607 |
| 131 | 1 | 0 | -5.633267 | 1.382031  | -2.866660 |
| 132 | 1 | 0 | -6.190085 | 3.586006  | -3.867906 |
| 133 | 1 | 0 | -4.484967 | 4.034366  | -3.886143 |
| 134 | 6 | 0 | 0.958839  | -0.868155 | 2.526754  |
| 135 | 8 | 0 | 0.893498  | -2.037838 | 2.128730  |
| 136 | 8 | 0 | 1.962356  | -0.499334 | 3.385410  |
| 137 | 8 | 0 | 0.184942  | 0.120791  | 2.240493  |
| 138 | 1 | 0 | -0.399737 | -0.038871 | 1.050587  |
| 139 | 1 | 0 | 2.466562  | -1.308390 | 3.569493  |

-----  
**<sup>1</sup>TS6 E(opt) = -3453.72763485 hartree**  
 -----

| Center<br>Number | Atomic<br>Number | Atomic<br>Type | Coordinates (Angstroms) |           |           |
|------------------|------------------|----------------|-------------------------|-----------|-----------|
|                  |                  |                | X                       | Y         | Z         |
| 1                | 77               | 0              | -0.882229               | -0.007033 | -0.024478 |
| 2                | 1                | 0              | -2.550209               | -0.908388 | -4.151203 |

|    |    |   |           |           |           |
|----|----|---|-----------|-----------|-----------|
| 3  | 15 | 0 | -2.104612 | -1.921031 | 0.224189  |
| 4  | 15 | 0 | -2.122023 | 1.913044  | 0.022415  |
| 5  | 6  | 0 | 1.941268  | -0.731357 | 0.165628  |
| 6  | 6  | 0 | 0.569542  | -2.652410 | -0.028861 |
| 7  | 6  | 0 | 3.074919  | -1.521990 | 0.317377  |
| 8  | 6  | 0 | 1.683283  | -3.475999 | 0.126569  |
| 9  | 6  | 0 | 2.954890  | -2.916512 | 0.305164  |
| 10 | 1  | 0 | 4.050533  | -1.065530 | 0.431259  |
| 11 | 1  | 0 | 1.559334  | -4.553104 | 0.092600  |
| 12 | 6  | 0 | 1.939249  | 0.743457  | 0.101084  |
| 13 | 6  | 0 | 0.564394  | 2.631025  | -0.269707 |
| 14 | 6  | 0 | 3.067206  | 1.551536  | 0.201952  |
| 15 | 6  | 0 | 1.667612  | 3.472267  | -0.165104 |
| 16 | 6  | 0 | 2.941408  | 2.941725  | 0.082944  |
| 17 | 1  | 0 | 4.041145  | 1.110043  | 0.375266  |
| 18 | 1  | 0 | 1.536221  | 4.540647  | -0.295620 |
| 19 | 6  | 0 | 4.161987  | -3.781665 | 0.453350  |
| 20 | 6  | 0 | 4.798011  | -4.291987 | -0.697456 |
| 21 | 6  | 0 | 4.656928  | -4.078432 | 1.737716  |
| 22 | 6  | 0 | 5.930052  | -5.097995 | -0.537667 |
| 23 | 6  | 0 | 5.792097  | -4.890573 | 1.852969  |
| 24 | 6  | 0 | 6.443333  | -5.407524 | 0.728103  |
| 25 | 1  | 0 | 6.423640  | -5.493799 | -1.422884 |
| 26 | 1  | 0 | 6.173556  | -5.124686 | 2.844451  |
| 27 | 6  | 0 | 4.126896  | 3.838001  | 0.199954  |
| 28 | 6  | 0 | 5.161961  | 3.775062  | -0.757140 |
| 29 | 6  | 0 | 4.206727  | 4.755678  | 1.272703  |
| 30 | 6  | 0 | 6.254239  | 4.642629  | -0.631434 |
| 31 | 6  | 0 | 5.321241  | 5.595256  | 1.363730  |
| 32 | 6  | 0 | 6.353157  | 5.560028  | 0.418350  |

|    |   |   |           |           |           |
|----|---|---|-----------|-----------|-----------|
| 33 | 1 | 0 | 7.046527  | 4.598696  | -1.375758 |
| 34 | 1 | 0 | 5.387286  | 6.292520  | 2.196193  |
| 35 | 6 | 0 | 7.683540  | -6.257339 | 0.865943  |
| 36 | 1 | 0 | 7.672467  | -7.096993 | 0.162603  |
| 37 | 1 | 0 | 8.586574  | -5.671376 | 0.651561  |
| 38 | 1 | 0 | 7.785405  | -6.659794 | 1.878356  |
| 39 | 6 | 0 | 4.269726  | -3.971960 | -2.076324 |
| 40 | 1 | 0 | 3.258549  | -4.372325 | -2.217434 |
| 41 | 1 | 0 | 4.202779  | -2.890846 | -2.242207 |
| 42 | 1 | 0 | 4.911418  | -4.400766 | -2.851316 |
| 43 | 6 | 0 | 3.972766  | -3.537448 | 2.971377  |
| 44 | 1 | 0 | 3.994708  | -2.441434 | 2.992272  |
| 45 | 1 | 0 | 2.916860  | -3.830985 | 3.003206  |
| 46 | 1 | 0 | 4.454694  | -3.902119 | 3.882577  |
| 47 | 6 | 0 | 5.130479  | 2.795432  | -1.909579 |
| 48 | 1 | 0 | 5.561106  | 1.832028  | -1.603481 |
| 49 | 1 | 0 | 4.116396  | 2.606229  | -2.274325 |
| 50 | 1 | 0 | 5.734628  | 3.161618  | -2.744918 |
| 51 | 6 | 0 | 3.127941  | 4.832812  | 2.330363  |
| 52 | 1 | 0 | 2.223352  | 5.322377  | 1.951484  |
| 53 | 1 | 0 | 2.828348  | 3.838189  | 2.677651  |
| 54 | 1 | 0 | 3.474533  | 5.405324  | 3.195248  |
| 55 | 6 | 0 | 7.523933  | 6.507319  | 0.516285  |
| 56 | 1 | 0 | 8.414240  | 6.097196  | 0.029435  |
| 57 | 1 | 0 | 7.295446  | 7.463134  | 0.027010  |
| 58 | 1 | 0 | 7.772829  | 6.729751  | 1.558982  |
| 59 | 7 | 0 | 0.711429  | -1.305331 | 0.017866  |
| 60 | 7 | 0 | 0.708579  | 1.294733  | -0.104082 |
| 61 | 6 | 0 | -0.814734 | -3.165240 | -0.324442 |
| 62 | 6 | 0 | -0.818913 | 3.104070  | -0.625061 |

|    |   |   |           |           |           |
|----|---|---|-----------|-----------|-----------|
| 63 | 1 | 0 | -0.922564 | -3.222447 | -1.415633 |
| 64 | 1 | 0 | -0.972808 | -4.162597 | 0.094521  |
| 65 | 1 | 0 | -0.980814 | 4.142224  | -0.330426 |
| 66 | 1 | 0 | -0.918801 | 3.058097  | -1.717149 |
| 67 | 6 | 0 | -2.374993 | -2.395017 | 2.013845  |
| 68 | 6 | 0 | -3.015872 | -1.264905 | 2.842531  |
| 69 | 6 | 0 | -3.095919 | -3.731283 | 2.268915  |
| 70 | 1 | 0 | -1.335042 | -2.501549 | 2.361132  |
| 71 | 6 | 0 | -3.021659 | -1.612158 | 4.338915  |
| 72 | 1 | 0 | -4.047272 | -1.101901 | 2.505568  |
| 73 | 1 | 0 | -2.471121 | -0.331242 | 2.673060  |
| 74 | 6 | 0 | -3.082491 | -4.078220 | 3.767063  |
| 75 | 1 | 0 | -4.137123 | -3.647184 | 1.934541  |
| 76 | 1 | 0 | -2.635632 | -4.540314 | 1.690916  |
| 77 | 6 | 0 | -3.712426 | -2.956829 | 4.605276  |
| 78 | 1 | 0 | -3.513344 | -0.809991 | 4.903336  |
| 79 | 1 | 0 | -1.983073 | -1.662174 | 4.697268  |
| 80 | 1 | 0 | -3.612465 | -5.024075 | 3.933831  |
| 81 | 1 | 0 | -2.043385 | -4.234667 | 4.090682  |
| 82 | 1 | 0 | -3.665867 | -3.205649 | 5.672580  |
| 83 | 1 | 0 | -4.777708 | -2.871344 | 4.345976  |
| 84 | 6 | 0 | -3.595636 | -2.291569 | -0.818993 |
| 85 | 6 | 0 | -3.956628 | -3.771557 | -1.057042 |
| 86 | 6 | 0 | -4.825744 | -1.491458 | -0.348898 |
| 87 | 1 | 0 | -3.275248 | -1.882935 | -1.785800 |
| 88 | 6 | 0 | -5.094972 | -3.876552 | -2.086584 |
| 89 | 1 | 0 | -4.281409 | -4.237980 | -0.121509 |
| 90 | 1 | 0 | -3.083284 | -4.329714 | -1.409986 |
| 91 | 6 | 0 | -5.963445 | -1.604512 | -1.375006 |
| 92 | 1 | 0 | -5.169077 | -1.882265 | 0.617887  |



|     |   |   |           |           |           |
|-----|---|---|-----------|-----------|-----------|
| 93  | 1 | 0 | -4.559657 | -0.440537 | -0.193437 |
| 94  | 6 | 0 | -6.326687 | -3.071279 | -1.647598 |
| 95  | 1 | 0 | -5.361764 | -4.929718 | -2.238592 |
| 96  | 1 | 0 | -4.739488 | -3.495940 | -3.054574 |
| 97  | 1 | 0 | -6.842264 | -1.050031 | -1.023046 |
| 98  | 1 | 0 | -5.642777 | -1.131225 | -2.313211 |
| 99  | 1 | 0 | -7.113191 | -3.133273 | -2.409737 |
| 100 | 1 | 0 | -6.738887 | -3.516219 | -0.730233 |
| 101 | 6 | 0 | -2.564969 | 2.504198  | 1.751959  |
| 102 | 6 | 0 | -2.227013 | 3.967806  | 2.095921  |
| 103 | 6 | 0 | -4.031506 | 2.181990  | 2.106905  |
| 104 | 1 | 0 | -1.927094 | 1.870409  | 2.381829  |
| 105 | 6 | 0 | -2.520098 | 4.252257  | 3.579606  |
| 106 | 1 | 0 | -2.816394 | 4.647725  | 1.467637  |
| 107 | 1 | 0 | -1.170829 | 4.175340  | 1.892612  |
| 108 | 6 | 0 | -4.301942 | 2.452316  | 3.594279  |
| 109 | 1 | 0 | -4.698283 | 2.813740  | 1.506299  |
| 110 | 1 | 0 | -4.268712 | 1.142006  | 1.861087  |
| 111 | 6 | 0 | -3.966524 | 3.905424  | 3.958106  |
| 112 | 1 | 0 | -2.308015 | 5.305162  | 3.802306  |
| 113 | 1 | 0 | -1.834029 | 3.653704  | 4.196092  |
| 114 | 1 | 0 | -5.350421 | 2.230425  | 3.827894  |
| 115 | 1 | 0 | -3.689043 | 1.771406  | 4.201994  |
| 116 | 1 | 0 | -4.130493 | 4.079810  | 5.028542  |
| 117 | 1 | 0 | -4.651029 | 4.576235  | 3.419120  |
| 118 | 6 | 0 | -3.598112 | 2.238676  | -1.060537 |
| 119 | 6 | 0 | -3.941447 | 3.728452  | -1.256533 |
| 120 | 6 | 0 | -3.445366 | 1.515239  | -2.412223 |
| 121 | 1 | 0 | -4.432037 | 1.763175  | -0.528622 |
| 122 | 6 | 0 | -5.197946 | 3.891623  | -2.127576 |

|     |   |   |           |           |           |
|-----|---|---|-----------|-----------|-----------|
| 123 | 1 | 0 | -3.100470 | 4.235678  | -1.747544 |
| 124 | 1 | 0 | -4.090876 | 4.218407  | -0.289015 |
| 125 | 6 | 0 | -4.700608 | 1.694761  | -3.278722 |
| 126 | 1 | 0 | -2.573730 | 1.911078  | -2.949884 |
| 127 | 1 | 0 | -3.248230 | 0.452843  | -2.241411 |
| 128 | 6 | 0 | -5.041942 | 3.177971  | -3.477465 |
| 129 | 1 | 0 | -5.407946 | 4.957575  | -2.278916 |
| 130 | 1 | 0 | -6.061751 | 3.470263  | -1.593408 |
| 131 | 1 | 0 | -4.556592 | 1.199813  | -4.247260 |
| 132 | 1 | 0 | -5.547422 | 1.193422  | -2.789476 |
| 133 | 1 | 0 | -5.958087 | 3.282721  | -4.071586 |
| 134 | 1 | 0 | -4.235931 | 3.660783  | -4.048840 |
| 135 | 6 | 0 | -1.542456 | -1.251846 | -3.828809 |
| 136 | 8 | 0 | -0.642880 | -0.336491 | -3.939190 |
| 137 | 8 | 0 | -1.398596 | -2.416868 | -3.438201 |
| 138 | 6 | 0 | 2.400319  | -0.020491 | -3.053814 |
| 139 | 8 | 0 | 2.182799  | 1.191573  | -3.112140 |
| 140 | 8 | 0 | 3.650727  | -0.480724 | -2.720638 |
| 141 | 8 | 0 | 1.592983  | -0.997789 | -3.281502 |
| 142 | 1 | 0 | 0.496543  | -0.666911 | -3.570864 |
| 143 | 1 | 0 | 4.189091  | 0.306699  | -2.548749 |

-----

**<sup>1</sup>TS7 E(opt) = -3188.64523298 hartree**

-----

| Center<br>Number | Atomic<br>Number | Atomic<br>Type | Coordinates (Angstroms) |           |           |
|------------------|------------------|----------------|-------------------------|-----------|-----------|
|                  |                  |                | X                       | Y         | Z         |
| 1                | 77               | 0              | -0.728821               | 0.020869  | -0.149894 |
| 2                | 1                | 0              | -0.773727               | -1.052361 | -2.502283 |
| 3                | 15               | 0              | -1.911068               | -1.908025 | 0.273469  |

|    |    |   |           |           |           |
|----|----|---|-----------|-----------|-----------|
| 4  | 15 | 0 | -1.996257 | 1.912494  | -0.177661 |
| 5  | 6  | 0 | 2.115373  | -0.699793 | -0.134420 |
| 6  | 6  | 0 | 0.703380  | -2.630688 | -0.104677 |
| 7  | 6  | 0 | 3.262539  | -1.479548 | -0.074616 |
| 8  | 6  | 0 | 1.856632  | -3.443986 | -0.019195 |
| 9  | 6  | 0 | 3.128506  | -2.881112 | -0.004395 |
| 10 | 1  | 0 | 4.246570  | -1.026503 | -0.085543 |
| 11 | 1  | 0 | 1.737715  | -4.521935 | 0.022673  |
| 12 | 6  | 0 | 2.095748  | 0.776083  | -0.226650 |
| 13 | 6  | 0 | 0.687987  | 2.656307  | -0.538979 |
| 14 | 6  | 0 | 3.216202  | 1.598973  | -0.152652 |
| 15 | 6  | 0 | 1.785352  | 3.509347  | -0.459766 |
| 16 | 6  | 0 | 3.070169  | 2.988594  | -0.249039 |
| 17 | 1  | 0 | 4.198781  | 1.168824  | 0.001025  |
| 18 | 1  | 0 | 1.639324  | 4.578774  | -0.566697 |
| 19 | 6  | 0 | 4.343825  | -3.746176 | 0.078315  |
| 20 | 6  | 0 | 4.893299  | -4.296769 | -1.096782 |
| 21 | 6  | 0 | 4.938019  | -3.999793 | 1.330775  |
| 22 | 6  | 0 | 6.035503  | -5.099926 | -0.997551 |
| 23 | 6  | 0 | 6.078426  | -4.809443 | 1.387280  |
| 24 | 6  | 0 | 6.640902  | -5.370527 | 0.235006  |
| 25 | 1  | 0 | 6.463130  | -5.521976 | -1.904591 |
| 26 | 1  | 0 | 6.538200  | -5.005471 | 2.353657  |
| 27 | 6  | 0 | 4.251661  | 3.890856  | -0.121954 |
| 28 | 6  | 0 | 5.183747  | 3.986203  | -1.175488 |
| 29 | 6  | 0 | 4.431962  | 4.638465  | 1.061060  |
| 30 | 6  | 0 | 6.284606  | 4.838370  | -1.028609 |
| 31 | 6  | 0 | 5.549905  | 5.472806  | 1.168638  |
| 32 | 6  | 0 | 6.485512  | 5.589930  | 0.134256  |
| 33 | 1  | 0 | 7.001758  | 4.915881  | -1.842892 |

|    |   |   |           |           |           |
|----|---|---|-----------|-----------|-----------|
| 34 | 1 | 0 | 5.695442  | 6.041635  | 2.084490  |
| 35 | 6 | 0 | 7.851358  | -6.268646 | 0.322835  |
| 36 | 1 | 0 | 7.553189  | -7.317043 | 0.454092  |
| 37 | 1 | 0 | 8.457110  | -6.216013 | -0.587502 |
| 38 | 1 | 0 | 8.486531  | -6.003706 | 1.174199  |
| 39 | 6 | 0 | 4.267140  | -4.018953 | -2.443444 |
| 40 | 1 | 0 | 3.237884  | -4.393088 | -2.490467 |
| 41 | 1 | 0 | 4.218446  | -2.942439 | -2.645624 |
| 42 | 1 | 0 | 4.836530  | -4.490742 | -3.248964 |
| 43 | 6 | 0 | 4.354244  | -3.409975 | 2.593339  |
| 44 | 1 | 0 | 4.356878  | -2.314117 | 2.560720  |
| 45 | 1 | 0 | 3.310644  | -3.716851 | 2.730159  |
| 46 | 1 | 0 | 4.919528  | -3.724120 | 3.475074  |
| 47 | 6 | 0 | 5.002325  | 3.193744  | -2.449509 |
| 48 | 1 | 0 | 5.106074  | 2.117023  | -2.272435 |
| 49 | 1 | 0 | 4.005728  | 3.348028  | -2.878691 |
| 50 | 1 | 0 | 5.744215  | 3.482331  | -3.199084 |
| 51 | 6 | 0 | 3.451190  | 4.533787  | 2.206528  |
| 52 | 1 | 0 | 2.471651  | 4.945419  | 1.937080  |
| 53 | 1 | 0 | 3.285137  | 3.490297  | 2.497962  |
| 54 | 1 | 0 | 3.813371  | 5.078419  | 3.082770  |
| 55 | 6 | 0 | 7.663647  | 6.524935  | 0.261381  |
| 56 | 1 | 0 | 8.501767  | 6.202472  | -0.364282 |
| 57 | 1 | 0 | 7.392962  | 7.541068  | -0.053852 |
| 58 | 1 | 0 | 8.012647  | 6.590644  | 1.297046  |
| 59 | 7 | 0 | 0.877377  | -1.272191 | -0.132346 |
| 60 | 7 | 0 | 0.850661  | 1.318301  | -0.382611 |
| 61 | 6 | 0 | -0.652261 | -3.120626 | -0.265388 |
| 62 | 6 | 0 | -0.711337 | 3.117739  | -0.848439 |
| 63 | 1 | 0 | -0.819237 | -3.093267 | -1.715153 |

|    |   |   |           |           |           |
|----|---|---|-----------|-----------|-----------|
| 64 | 1 | 0 | -0.798314 | -4.156954 | 0.047005  |
| 65 | 1 | 0 | -0.871357 | 4.152891  | -0.542555 |
| 66 | 1 | 0 | -0.837317 | 3.085707  | -1.938366 |
| 67 | 6 | 0 | -2.200413 | -2.259740 | 2.091747  |
| 68 | 6 | 0 | -2.875969 | -1.103615 | 2.853537  |
| 69 | 6 | 0 | -2.887099 | -3.600169 | 2.411324  |
| 70 | 1 | 0 | -1.161738 | -2.320558 | 2.452210  |
| 71 | 6 | 0 | -2.888070 | -1.372534 | 4.366370  |
| 72 | 1 | 0 | -3.907969 | -0.981325 | 2.503719  |
| 73 | 1 | 0 | -2.351927 | -0.167253 | 2.638924  |
| 74 | 6 | 0 | -2.888412 | -3.866861 | 3.925841  |
| 75 | 1 | 0 | -3.924833 | -3.567151 | 2.057439  |
| 76 | 1 | 0 | -2.392372 | -4.423565 | 1.883231  |
| 77 | 6 | 0 | -3.553976 | -2.716350 | 4.694562  |
| 78 | 1 | 0 | -3.401856 | -0.553603 | 4.885477  |
| 79 | 1 | 0 | -1.852385 | -1.382736 | 4.736252  |
| 80 | 1 | 0 | -3.400213 | -4.814036 | 4.137113  |
| 81 | 1 | 0 | -1.851051 | -3.982270 | 4.271612  |
| 82 | 1 | 0 | -3.518378 | -2.907511 | 5.774185  |
| 83 | 1 | 0 | -4.616952 | -2.667686 | 4.416491  |
| 84 | 6 | 0 | -3.442231 | -2.288857 | -0.719269 |
| 85 | 6 | 0 | -3.778598 | -3.774921 | -0.952014 |
| 86 | 6 | 0 | -4.677340 | -1.514634 | -0.222644 |
| 87 | 1 | 0 | -3.169515 | -1.869300 | -1.697187 |
| 88 | 6 | 0 | -4.942070 | -3.905904 | -1.949665 |
| 89 | 1 | 0 | -4.061524 | -4.251195 | -0.006866 |
| 90 | 1 | 0 | -2.901195 | -4.304805 | -1.334889 |
| 91 | 6 | 0 | -5.837492 | -1.649528 | -1.220651 |
| 92 | 1 | 0 | -4.992905 | -1.911778 | 0.750492  |
| 93 | 1 | 0 | -4.428938 | -0.458704 | -0.071357 |

|     |   |   |           |           |           |
|-----|---|---|-----------|-----------|-----------|
| 94  | 6 | 0 | -6.178518 | -3.123463 | -1.483676 |
| 95  | 1 | 0 | -5.192233 | -4.964383 | -2.093881 |
| 96  | 1 | 0 | -4.617640 | -3.521020 | -2.927331 |
| 97  | 1 | 0 | -6.718493 | -1.112674 | -0.847103 |
| 98  | 1 | 0 | -5.550607 | -1.170268 | -2.167037 |
| 99  | 1 | 0 | -6.981486 | -3.202075 | -2.227036 |
| 100 | 1 | 0 | -6.560638 | -3.574508 | -0.556280 |
| 101 | 6 | 0 | -2.522942 | 2.575664  | 1.502273  |
| 102 | 6 | 0 | -2.247199 | 4.064233  | 1.789065  |
| 103 | 6 | 0 | -3.989569 | 2.218094  | 1.821833  |
| 104 | 1 | 0 | -1.887466 | 1.995367  | 2.183885  |
| 105 | 6 | 0 | -2.605153 | 4.406620  | 3.246078  |
| 106 | 1 | 0 | -2.833336 | 4.694501  | 1.108322  |
| 107 | 1 | 0 | -1.191287 | 4.298761  | 1.616644  |
| 108 | 6 | 0 | -4.323961 | 2.547969  | 3.283865  |
| 109 | 1 | 0 | -4.656096 | 2.795183  | 1.168398  |
| 110 | 1 | 0 | -4.181082 | 1.159901  | 1.619290  |
| 111 | 6 | 0 | -4.052124 | 4.027515  | 3.589444  |
| 112 | 1 | 0 | -2.436198 | 5.475384  | 3.426264  |
| 113 | 1 | 0 | -1.923149 | 3.861249  | 3.914247  |
| 114 | 1 | 0 | -5.372138 | 2.299475  | 3.490781  |
| 115 | 1 | 0 | -3.710909 | 1.918636  | 3.944629  |
| 116 | 1 | 0 | -4.261244 | 4.245628  | 4.643887  |
| 117 | 1 | 0 | -4.738477 | 4.647838  | 2.995107  |
| 118 | 6 | 0 | -3.440126 | 2.142160  | -1.332780 |
| 119 | 6 | 0 | -3.845685 | 3.606762  | -1.589966 |
| 120 | 6 | 0 | -3.194742 | 1.393221  | -2.658411 |
| 121 | 1 | 0 | -4.272990 | 1.639276  | -0.824689 |
| 122 | 6 | 0 | -5.070949 | 3.684593  | -2.515878 |
| 123 | 1 | 0 | -3.009259 | 4.139416  | -2.061851 |

|     |   |   |           |           |           |
|-----|---|---|-----------|-----------|-----------|
| 124 | 1 | 0 | -4.058867 | 4.118395  | -0.646097 |
| 125 | 6 | 0 | -4.419166 | 1.484942  | -3.581324 |
| 126 | 1 | 0 | -2.325468 | 1.827849  | -3.172000 |
| 127 | 1 | 0 | -2.948393 | 0.345999  | -2.455435 |
| 128 | 6 | 0 | -4.825555 | 2.942676  | -3.836900 |
| 129 | 1 | 0 | -5.325079 | 4.734465  | -2.706993 |
| 130 | 1 | 0 | -5.935145 | 3.236481  | -2.004647 |
| 131 | 1 | 0 | -4.208353 | 0.971967  | -4.527845 |
| 132 | 1 | 0 | -5.259586 | 0.953869  | -3.112717 |
| 133 | 1 | 0 | -5.720816 | 2.984233  | -4.469368 |
| 134 | 1 | 0 | -4.022003 | 3.449673  | -4.390629 |
| 135 | 6 | 0 | -0.943486 | -1.802125 | -3.312492 |
| 136 | 8 | 0 | -1.101742 | -1.440041 | -4.475867 |
| 137 | 8 | 0 | -0.957572 | -3.042493 | -2.901091 |

-----  
**<sup>1</sup>TS8 E(opt) = -3263.89301507 hartree**  
 -----

| Center<br>Number | Atomic<br>Number | Atomic<br>Type | Coordinates (Angstroms) |           |           |
|------------------|------------------|----------------|-------------------------|-----------|-----------|
|                  |                  |                | X                       | Y         | Z         |
| 1                | 77               | 0              | 0.722345                | 0.221694  | -0.221078 |
| 2                | 15               | 0              | 1.925908                | 2.160219  | -0.232269 |
| 3                | 15               | 0              | 2.011534                | -1.711490 | -0.243882 |
| 4                | 6                | 0              | -2.135656               | 0.878353  | -0.176432 |
| 5                | 6                | 0              | -0.810374               | 2.831504  | -0.314785 |
| 6                | 6                | 0              | -3.295071               | 1.643665  | -0.089226 |
| 7                | 6                | 0              | -1.948794               | 3.628022  | -0.211178 |
| 8                | 6                | 0              | -3.213722               | 3.041042  | -0.086534 |
| 9                | 1                | 0              | -4.262222               | 1.161410  | -0.012039 |
| 10               | 1                | 0              | -1.846361               | 4.707680  | -0.236527 |

|    |   |   |           |           |           |
|----|---|---|-----------|-----------|-----------|
| 11 | 6 | 0 | -2.101475 | -0.597744 | -0.180609 |
| 12 | 6 | 0 | -0.634748 | -2.480705 | -0.148357 |
| 13 | 6 | 0 | -3.225084 | -1.411652 | -0.195480 |
| 14 | 6 | 0 | -1.765794 | -3.331717 | -0.201554 |
| 15 | 6 | 0 | -3.052205 | -2.811009 | -0.219210 |
| 16 | 1 | 0 | -4.221713 | -0.987762 | -0.196257 |
| 17 | 1 | 0 | -1.612206 | -4.406050 | -0.197806 |
| 18 | 6 | 0 | -4.442404 | 3.878761  | 0.039775  |
| 19 | 6 | 0 | -5.002549 | 4.481153  | -1.105096 |
| 20 | 6 | 0 | -5.037285 | 4.057745  | 1.305401  |
| 21 | 6 | 0 | -6.157410 | 5.258665  | -0.962273 |
| 22 | 6 | 0 | -6.189079 | 4.846684  | 1.404595  |
| 23 | 6 | 0 | -6.763339 | 5.456766  | 0.283674  |
| 24 | 1 | 0 | -6.595286 | 5.717846  | -1.845980 |
| 25 | 1 | 0 | -6.648084 | 4.987576  | 2.380785  |
| 26 | 6 | 0 | -4.242329 | -3.713316 | -0.236872 |
| 27 | 6 | 0 | -4.892496 | -3.996903 | -1.454850 |
| 28 | 6 | 0 | -4.708687 | -4.275448 | 0.968469  |
| 29 | 6 | 0 | -6.005014 | -4.845883 | -1.446702 |
| 30 | 6 | 0 | -5.826245 | -5.118168 | 0.933920  |
| 31 | 6 | 0 | -6.489316 | -5.413747 | -0.262401 |
| 32 | 1 | 0 | -6.503906 | -5.069902 | -2.387337 |
| 33 | 1 | 0 | -6.187160 | -5.552758 | 1.863703  |
| 34 | 6 | 0 | -7.986975 | 6.330363  | 0.418982  |
| 35 | 1 | 0 | -7.703836 | 7.377474  | 0.588143  |
| 36 | 1 | 0 | -8.601151 | 6.303410  | -0.486804 |
| 37 | 1 | 0 | -8.608547 | 6.021778  | 1.265525  |
| 38 | 6 | 0 | -4.380652 | 4.281864  | -2.467710 |
| 39 | 1 | 0 | -3.374161 | 4.713256  | -2.516730 |
| 40 | 1 | 0 | -4.278687 | 3.217141  | -2.707938 |



|    |   |   |           |           |           |
|----|---|---|-----------|-----------|-----------|
| 41 | 1 | 0 | -4.985735 | 4.750362  | -3.248676 |
| 42 | 6 | 0 | -4.442766 | 3.417452  | 2.538288  |
| 43 | 1 | 0 | -4.476516 | 2.323407  | 2.478836  |
| 44 | 1 | 0 | -3.388966 | 3.692959  | 2.662611  |
| 45 | 1 | 0 | -4.982375 | 3.722067  | 3.439165  |
| 46 | 6 | 0 | -4.390620 | -3.405029 | -2.751199 |
| 47 | 1 | 0 | -4.429870 | -2.309660 | -2.732205 |
| 48 | 1 | 0 | -3.344690 | -3.678004 | -2.934511 |
| 49 | 1 | 0 | -4.986359 | -3.750562 | -3.600554 |
| 50 | 6 | 0 | -4.021788 | -3.970138 | 2.279573  |
| 51 | 1 | 0 | -2.979516 | -4.308722 | 2.277629  |
| 52 | 1 | 0 | -3.998503 | -2.891129 | 2.473426  |
| 53 | 1 | 0 | -4.534351 | -4.454387 | 3.115340  |
| 54 | 6 | 0 | -7.712894 | -6.298174 | -0.273685 |
| 55 | 1 | 0 | -7.779786 | -6.878109 | -1.199994 |
| 56 | 1 | 0 | -7.711324 | -6.996439 | 0.569230  |
| 57 | 1 | 0 | -8.630437 | -5.699934 | -0.199802 |
| 58 | 7 | 0 | -0.908490 | 1.479081  | -0.260168 |
| 59 | 7 | 0 | -0.842864 | -1.126847 | -0.181945 |
| 60 | 6 | 0 | 0.558196  | 3.406150  | -0.568453 |
| 61 | 6 | 0 | 0.712387  | -2.945715 | 0.071463  |
| 62 | 1 | 0 | 0.613402  | 3.662603  | -1.633689 |
| 63 | 1 | 0 | 0.701635  | 4.338040  | -0.014335 |
| 64 | 1 | 0 | 0.904396  | -3.972507 | -0.245402 |
| 65 | 6 | 0 | 2.572839  | 2.726856  | 1.431148  |
| 66 | 6 | 0 | 3.433269  | 1.656051  | 2.127894  |
| 67 | 6 | 0 | 3.275762  | 4.095165  | 1.495190  |
| 68 | 1 | 0 | 1.629600  | 2.804112  | 1.995009  |
| 69 | 6 | 0 | 3.722864  | 2.046336  | 3.585069  |
| 70 | 1 | 0 | 4.382792  | 1.547000  | 1.589178  |

|     |   |   |          |           |           |
|-----|---|---|----------|-----------|-----------|
| 71  | 1 | 0 | 2.928121 | 0.687235  | 2.088762  |
| 72  | 6 | 0 | 3.548145 | 4.494291  | 2.955634  |
| 73  | 1 | 0 | 4.233277 | 4.029469  | 0.964644  |
| 74  | 1 | 0 | 2.684240 | 4.871325  | 0.997144  |
| 75  | 6 | 0 | 4.383854 | 3.428577  | 3.679101  |
| 76  | 1 | 0 | 4.359345 | 1.285066  | 4.053373  |
| 77  | 1 | 0 | 2.776822 | 2.057336  | 4.145659  |
| 78  | 1 | 0 | 4.058658 | 5.464830  | 2.986103  |
| 79  | 1 | 0 | 2.589465 | 4.622835  | 3.478260  |
| 80  | 1 | 0 | 4.535620 | 3.709958  | 4.728436  |
| 81  | 1 | 0 | 5.380513 | 3.381445  | 3.216647  |
| 82  | 6 | 0 | 3.125091 | 2.529939  | -1.619626 |
| 83  | 6 | 0 | 3.493272 | 4.002448  | -1.895506 |
| 84  | 6 | 0 | 4.392970 | 1.662803  | -1.534889 |
| 85  | 1 | 0 | 2.541295 | 2.171023  | -2.481787 |
| 86  | 6 | 0 | 4.312675 | 4.111975  | -3.193186 |
| 87  | 1 | 0 | 4.092287 | 4.397178  | -1.069280 |
| 88  | 1 | 0 | 2.596910 | 4.627381  | -1.968688 |
| 89  | 6 | 0 | 5.233431 | 1.783230  | -2.815230 |
| 90  | 1 | 0 | 4.994159 | 1.977429  | -0.671115 |
| 91  | 1 | 0 | 4.117051 | 0.618798  | -1.370614 |
| 92  | 6 | 0 | 5.578339 | 3.245313  | -3.130134 |
| 93  | 1 | 0 | 4.577015 | 5.160778  | -3.376150 |
| 94  | 1 | 0 | 3.691788 | 3.788301  | -4.040898 |
| 95  | 1 | 0 | 6.148142 | 1.185579  | -2.716815 |
| 96  | 1 | 0 | 4.664220 | 1.356315  | -3.653577 |
| 97  | 1 | 0 | 6.133955 | 3.311581  | -4.073604 |
| 98  | 1 | 0 | 6.241044 | 3.635852  | -2.344294 |
| 99  | 6 | 0 | 3.332919 | -2.040941 | 1.037950  |
| 100 | 6 | 0 | 3.577269 | -3.509907 | 1.448056  |

|     |   |   |          |           |           |
|-----|---|---|----------|-----------|-----------|
| 101 | 6 | 0 | 4.673002 | -1.359107 | 0.709985  |
| 102 | 1 | 0 | 2.899718 | -1.539248 | 1.911924  |
| 103 | 6 | 0 | 4.506773 | -3.562787 | 2.672935  |
| 104 | 1 | 0 | 4.044575 | -4.062564 | 0.625035  |
| 105 | 1 | 0 | 2.635970 | -4.009391 | 1.683435  |
| 106 | 6 | 0 | 5.618475 | -1.411534 | 1.920296  |
| 107 | 1 | 0 | 5.145183 | -1.866906 | -0.142264 |
| 108 | 1 | 0 | 4.513200 | -0.322054 | 0.412391  |
| 109 | 6 | 0 | 5.840843 | -2.852909 | 2.400215  |
| 110 | 1 | 0 | 4.683469 | -4.606471 | 2.962235  |
| 111 | 1 | 0 | 4.002227 | -3.080542 | 3.522940  |
| 112 | 1 | 0 | 6.577023 | -0.940308 | 1.668590  |
| 113 | 1 | 0 | 5.179425 | -0.820550 | 2.736616  |
| 114 | 1 | 0 | 6.471082 | -2.863409 | 3.298297  |
| 115 | 1 | 0 | 6.387491 | -3.408127 | 1.624050  |
| 116 | 6 | 0 | 2.772940 | -2.076007 | -1.919565 |
| 117 | 6 | 0 | 3.365826 | -3.486865 | -2.092425 |
| 118 | 6 | 0 | 1.748744 | -1.777190 | -3.034894 |
| 119 | 1 | 0 | 3.591881 | -1.349485 | -2.012344 |
| 120 | 6 | 0 | 3.964006 | -3.677743 | -3.496964 |
| 121 | 1 | 0 | 2.578383 | -4.235830 | -1.929235 |
| 122 | 1 | 0 | 4.141421 | -3.669425 | -1.344205 |
| 123 | 6 | 0 | 2.355806 | -1.970197 | -4.431966 |
| 124 | 1 | 0 | 0.886808 | -2.450530 | -2.919424 |
| 125 | 1 | 0 | 1.364997 | -0.756055 | -2.918591 |
| 126 | 6 | 0 | 2.939744 | -3.379121 | -4.598786 |
| 127 | 1 | 0 | 4.350834 | -4.699421 | -3.598788 |
| 128 | 1 | 0 | 4.823415 | -3.001295 | -3.612455 |
| 129 | 1 | 0 | 1.595190 | -1.776644 | -5.198886 |
| 130 | 1 | 0 | 3.153678 | -1.228174 | -4.581846 |

|     |   |   |          |           |           |
|-----|---|---|----------|-----------|-----------|
| 131 | 1 | 0 | 3.399595 | -3.490026 | -5.588672 |
| 132 | 1 | 0 | 2.124555 | -4.115284 | -4.543225 |
| 133 | 6 | 0 | 0.786206 | -2.596264 | 3.533678  |
| 134 | 8 | 0 | 0.981288 | -1.392859 | 3.363133  |
| 135 | 8 | 0 | 0.881667 | -3.149025 | 4.777499  |
| 136 | 8 | 0 | 0.475374 | -3.493974 | 2.650940  |
| 137 | 1 | 0 | 0.611893 | -3.136082 | 1.548678  |
| 138 | 1 | 0 | 1.099372 | -2.415726 | 5.375925  |

-----  
**<sup>1</sup>TS9      E(opt) = -3265.09024945 hartree**  
 -----

| Center<br>Number | Atomic<br>Number | Atomic<br>Type | Coordinates (Angstroms) |           |           |
|------------------|------------------|----------------|-------------------------|-----------|-----------|
|                  |                  |                | X                       | Y         | Z         |
| 1                | 77               | 0              | -0.904880               | -0.067505 | -0.779236 |
| 2                | 15               | 0              | -1.981070               | -2.037361 | -0.282580 |
| 3                | 15               | 0              | -2.188411               | 1.783655  | -0.278159 |
| 4                | 6                | 0              | 1.971864                | -0.648090 | -0.830900 |
| 5                | 6                | 0              | 0.676365                | -2.640131 | -0.876803 |
| 6                | 6                | 0              | 3.148662                | -1.403096 | -0.735121 |
| 7                | 6                | 0              | 1.821134                | -3.407292 | -0.771611 |
| 8                | 6                | 0              | 3.088801                | -2.791078 | -0.681436 |
| 9                | 1                | 0              | 4.107578                | -0.900966 | -0.678897 |
| 10               | 1                | 0              | 1.737040                | -4.488150 | -0.737306 |
| 11               | 6                | 0              | 1.898759                | 0.804170  | -0.808605 |
| 12               | 6                | 0              | 0.409499                | 2.657889  | -0.821601 |
| 13               | 6                | 0              | 2.993592                | 1.672136  | -0.685208 |
| 14               | 6                | 0              | 1.469538                | 3.534052  | -0.683859 |
| 15               | 6                | 0              | 2.794003                | 3.045296  | -0.602017 |
| 16               | 1                | 0              | 3.997800                | 1.268010  | -0.630988 |

|    |   |   |          |           |           |
|----|---|---|----------|-----------|-----------|
| 17 | 1 | 0 | 1.278894 | 4.601174  | -0.644381 |
| 18 | 6 | 0 | 4.322427 | -3.607195 | -0.487460 |
| 19 | 6 | 0 | 4.799453 | -4.437589 | -1.524705 |
| 20 | 6 | 0 | 5.007275 | -3.549976 | 0.746287  |
| 21 | 6 | 0 | 5.955199 | -5.196731 | -1.309902 |
| 22 | 6 | 0 | 6.156319 | -4.330909 | 0.920302  |
| 23 | 6 | 0 | 6.645691 | -5.161715 | -0.093041 |
| 24 | 1 | 0 | 6.327138 | -5.828317 | -2.113952 |
| 25 | 1 | 0 | 6.679924 | -4.290483 | 1.873231  |
| 26 | 6 | 0 | 3.940726 | 3.982045  | -0.419802 |
| 27 | 6 | 0 | 4.805783 | 4.261108  | -1.497264 |
| 28 | 6 | 0 | 4.150490 | 4.591068  | 0.836680  |
| 29 | 6 | 0 | 5.869979 | 5.150108  | -1.300078 |
| 30 | 6 | 0 | 5.227235 | 5.470436  | 0.991847  |
| 31 | 6 | 0 | 6.099083 | 5.763072  | -0.064104 |
| 32 | 1 | 0 | 6.532196 | 5.371270  | -2.134403 |
| 33 | 1 | 0 | 5.390905 | 5.937081  | 1.961101  |
| 34 | 6 | 0 | 7.866950 | -6.020678 | 0.129484  |
| 35 | 1 | 0 | 7.585559 | -7.010406 | 0.512402  |
| 36 | 1 | 0 | 8.420398 | -6.179872 | -0.801608 |
| 37 | 1 | 0 | 8.546272 | -5.571271 | 0.860818  |
| 38 | 6 | 0 | 4.095211 | -4.499988 | -2.860948 |
| 39 | 1 | 0 | 3.119152 | -4.992005 | -2.780997 |
| 40 | 1 | 0 | 3.911180 | -3.497755 | -3.263925 |
| 41 | 1 | 0 | 4.689278 | -5.056931 | -3.590979 |
| 42 | 6 | 0 | 4.519768 | -2.670744 | 1.877358  |
| 43 | 1 | 0 | 4.752661 | -1.615408 | 1.690015  |
| 44 | 1 | 0 | 3.433956 | -2.736432 | 2.000795  |
| 45 | 1 | 0 | 4.998906 | -2.951236 | 2.820125  |
| 46 | 6 | 0 | 4.590206 | 3.628222  | -2.852927 |

|    |   |   |           |           |           |
|----|---|---|-----------|-----------|-----------|
| 47 | 1 | 0 | 4.762971  | 2.546271  | -2.824621 |
| 48 | 1 | 0 | 3.562163  | 3.773333  | -3.203963 |
| 49 | 1 | 0 | 5.267927  | 4.055585  | -3.597289 |
| 50 | 6 | 0 | 3.239847  | 4.292187  | 2.005787  |
| 51 | 1 | 0 | 2.222743  | 4.661453  | 1.830531  |
| 52 | 1 | 0 | 3.154998  | 3.213471  | 2.181138  |
| 53 | 1 | 0 | 3.612210  | 4.758401  | 2.922209  |
| 54 | 6 | 0 | 7.269204  | 6.695055  | 0.139332  |
| 55 | 1 | 0 | 7.644483  | 7.082416  | -0.812842 |
| 56 | 1 | 0 | 6.997504  | 7.546212  | 0.772844  |
| 57 | 1 | 0 | 8.101264  | 6.178394  | 0.635017  |
| 58 | 7 | 0 | 0.754137  | -1.278788 | -0.882069 |
| 59 | 7 | 0 | 0.622738  | 1.309660  | -0.849967 |
| 60 | 6 | 0 | -0.711298 | -3.212060 | -1.003562 |
| 61 | 6 | 0 | -1.024934 | 3.079626  | -0.978061 |
| 62 | 1 | 0 | -0.962573 | -3.286246 | -2.070758 |
| 63 | 1 | 0 | -0.768295 | -4.217815 | -0.580067 |
| 64 | 1 | 0 | -1.196679 | 4.084739  | -0.590429 |
| 65 | 1 | 0 | -1.263826 | 3.093589  | -2.050551 |
| 66 | 6 | 0 | -2.061242 | -2.555812 | 1.502460  |
| 67 | 6 | 0 | -2.714038 | -1.507443 | 2.421404  |
| 68 | 6 | 0 | -2.632196 | -3.955289 | 1.798053  |
| 69 | 1 | 0 | -0.989603 | -2.557117 | 1.746627  |
| 70 | 6 | 0 | -2.481214 | -1.870099 | 3.895913  |
| 71 | 1 | 0 | -3.792792 | -1.452813 | 2.227224  |
| 72 | 1 | 0 | -2.292808 | -0.523682 | 2.212511  |
| 73 | 6 | 0 | -2.396596 | -4.325970 | 3.272864  |
| 74 | 1 | 0 | -3.711416 | -3.959443 | 1.599565  |
| 75 | 1 | 0 | -2.183083 | -4.714085 | 1.147188  |
| 76 | 6 | 0 | -3.001203 | -3.278095 | 4.218579  |

|     |   |   |           |           |           |
|-----|---|---|-----------|-----------|-----------|
| 77  | 1 | 0 | -2.963569 | -1.127703 | 4.544041  |
| 78  | 1 | 0 | -1.402574 | -1.821500 | 4.102104  |
| 79  | 1 | 0 | -2.820237 | -5.316503 | 3.480738  |
| 80  | 1 | 0 | -1.314903 | -4.398299 | 3.455115  |
| 81  | 1 | 0 | -2.784643 | -3.537176 | 5.262439  |
| 82  | 1 | 0 | -4.095738 | -3.288816 | 4.110752  |
| 83  | 6 | 0 | -3.559926 | -2.444517 | -1.178726 |
| 84  | 6 | 0 | -3.904655 | -3.928397 | -1.413431 |
| 85  | 6 | 0 | -4.757664 | -1.695604 | -0.560073 |
| 86  | 1 | 0 | -3.361373 | -1.993497 | -2.161673 |
| 87  | 6 | 0 | -5.143053 | -4.044390 | -2.319785 |
| 88  | 1 | 0 | -4.113849 | -4.423015 | -0.459497 |
| 89  | 1 | 0 | -3.059305 | -4.454299 | -1.871057 |
| 90  | 6 | 0 | -5.994904 | -1.813517 | -1.462423 |
| 91  | 1 | 0 | -4.986370 | -2.128040 | 0.422613  |
| 92  | 1 | 0 | -4.506250 | -0.642231 | -0.396409 |
| 93  | 6 | 0 | -6.343714 | -3.283635 | -1.737636 |
| 94  | 1 | 0 | -5.397168 | -5.101235 | -2.467492 |
| 95  | 1 | 0 | -4.901098 | -3.634460 | -3.310808 |
| 96  | 1 | 0 | -6.845860 | -1.298499 | -0.999573 |
| 97  | 1 | 0 | -5.792590 | -1.301533 | -2.413723 |
| 98  | 1 | 0 | -7.201687 | -3.350922 | -2.417774 |
| 99  | 1 | 0 | -6.648575 | -3.761727 | -0.795428 |
| 100 | 6 | 0 | -2.414899 | 2.203089  | 1.545473  |
| 101 | 6 | 0 | -1.958344 | 3.610986  | 1.981418  |
| 102 | 6 | 0 | -3.834745 | 1.900977  | 2.068901  |
| 103 | 1 | 0 | -1.732409 | 1.495831  | 2.025609  |
| 104 | 6 | 0 | -2.032951 | 3.750366  | 3.511945  |
| 105 | 1 | 0 | -2.587454 | 4.378613  | 1.512884  |
| 106 | 1 | 0 | -0.929049 | 3.794831  | 1.654764  |

|     |   |   |           |           |           |
|-----|---|---|-----------|-----------|-----------|
| 107 | 6 | 0 | -3.882466 | 2.024987  | 3.599175  |
| 108 | 1 | 0 | -4.550146 | 2.611219  | 1.636156  |
| 109 | 1 | 0 | -4.154405 | 0.899037  | 1.763784  |
| 110 | 6 | 0 | -3.430705 | 3.419820  | 4.052661  |
| 111 | 1 | 0 | -1.738826 | 4.765815  | 3.805005  |
| 112 | 1 | 0 | -1.301597 | 3.065633  | 3.964739  |
| 113 | 1 | 0 | -4.897375 | 1.814287  | 3.958357  |
| 114 | 1 | 0 | -3.223208 | 1.265704  | 4.042534  |
| 115 | 1 | 0 | -3.440067 | 3.488450  | 5.147422  |
| 116 | 1 | 0 | -4.147364 | 4.166995  | 3.681931  |
| 117 | 6 | 0 | -3.827442 | 2.189781  | -1.078622 |
| 118 | 6 | 0 | -4.182597 | 3.691568  | -1.044857 |
| 119 | 6 | 0 | -3.956926 | 1.634232  | -2.508456 |
| 120 | 1 | 0 | -4.559149 | 1.653882  | -0.460752 |
| 121 | 6 | 0 | -5.593808 | 3.935639  | -1.603380 |
| 122 | 1 | 0 | -3.458076 | 4.248837  | -1.653355 |
| 123 | 1 | 0 | -4.113675 | 4.085648  | -0.026760 |
| 124 | 6 | 0 | -5.365041 | 1.888149  | -3.069747 |
| 125 | 1 | 0 | -3.211496 | 2.111184  | -3.160196 |
| 126 | 1 | 0 | -3.738524 | 0.562862  | -2.513365 |
| 127 | 6 | 0 | -5.737859 | 3.376085  | -3.024709 |
| 128 | 1 | 0 | -5.817196 | 5.009554  | -1.589218 |
| 129 | 1 | 0 | -6.328612 | 3.449607  | -0.945486 |
| 130 | 1 | 0 | -5.427645 | 1.507891  | -4.096940 |
| 131 | 1 | 0 | -6.091955 | 1.315341  | -2.476127 |
| 132 | 1 | 0 | -6.760527 | 3.525291  | -3.392423 |
| 133 | 1 | 0 | -5.073431 | 3.934791  | -3.699702 |
| 134 | 6 | 0 | 1.159211  | -0.659955 | 2.422585  |
| 135 | 8 | 0 | 1.106125  | -1.871559 | 2.202909  |
| 136 | 8 | 0 | 2.229622  | -0.122139 | 3.084487  |



|     |   |   |           |           |           |
|-----|---|---|-----------|-----------|-----------|
| 137 | 8 | 0 | 0.296520  | 0.252799  | 2.105419  |
| 138 | 1 | 0 | -0.314948 | -0.000984 | 1.067517  |
| 139 | 1 | 0 | 2.807426  | -0.868993 | 3.311262  |
| 140 | 1 | 0 | -1.453971 | -0.201204 | -2.419319 |

-----  
**<sup>1</sup>TS10**      **E(opt) = -3189.15692023 hartree**  
 -----

| Center<br>Number | Atomic<br>Number | Atomic<br>Type | Coordinates (Angstroms) |           |           |
|------------------|------------------|----------------|-------------------------|-----------|-----------|
|                  |                  |                | X                       | Y         | Z         |
| 1                | 77               | 0              | -0.798427               | -0.092151 | -0.443120 |
| 2                | 1                | 0              | -1.048635               | -0.176502 | -2.069919 |
| 3                | 15               | 0              | -1.966848               | -2.058771 | -0.166150 |
| 4                | 15               | 0              | -2.124574               | 1.803651  | -0.309822 |
| 5                | 6                | 0              | 2.064465                | -0.726324 | -0.489647 |
| 6                | 6                | 0              | 0.744104                | -2.690560 | -0.565440 |
| 7                | 6                | 0              | 3.231103                | -1.480884 | -0.418182 |
| 8                | 6                | 0              | 1.889210                | -3.479828 | -0.472057 |
| 9                | 6                | 0              | 3.152777                | -2.880374 | -0.393744 |
| 10               | 1                | 0              | 4.197973                | -0.993612 | -0.380738 |
| 11               | 1                | 0              | 1.793616                | -4.559762 | -0.466964 |
| 12               | 6                | 0              | 2.009290                | 0.752075  | -0.512469 |
| 13               | 6                | 0              | 0.549683                | 2.607021  | -0.701887 |
| 14               | 6                | 0              | 3.111313                | 1.595734  | -0.415279 |
| 15               | 6                | 0              | 1.627812                | 3.484629  | -0.602525 |
| 16               | 6                | 0              | 2.926730                | 2.984811  | -0.443151 |
| 17               | 1                | 0              | 4.107347                | 1.185920  | -0.301108 |
| 18               | 1                | 0              | 1.452901                | 4.553559  | -0.651314 |
| 19               | 6                | 0              | 4.388409                | -3.710106 | -0.295701 |
| 20               | 6                | 0              | 4.823675                | -4.453283 | -1.413089 |

|    |   |   |          |           |           |
|----|---|---|----------|-----------|-----------|
| 21 | 6 | 0 | 5.114790 | -3.743059 | 0.913499  |
| 22 | 6 | 0 | 5.987723 | -5.221368 | -1.299129 |
| 23 | 6 | 0 | 6.268847 | -4.531146 | 0.984333  |
| 24 | 6 | 0 | 6.721285 | -5.278161 | -0.108943 |
| 25 | 1 | 0 | 6.330803 | -5.786413 | -2.162979 |
| 26 | 1 | 0 | 6.827174 | -4.562556 | 1.917302  |
| 27 | 6 | 0 | 4.090284 | 3.906906  | -0.300478 |
| 28 | 6 | 0 | 5.003822 | 4.056143  | -1.364095 |
| 29 | 6 | 0 | 4.271638 | 4.614789  | 0.906154  |
| 30 | 6 | 0 | 6.089181 | 4.924591  | -1.202320 |
| 31 | 6 | 0 | 5.375082 | 5.466468  | 1.026852  |
| 32 | 6 | 0 | 6.292488 | 5.638281  | -0.016105 |
| 33 | 1 | 0 | 6.792537 | 5.045239  | -2.023244 |
| 34 | 1 | 0 | 5.523581 | 6.005041  | 1.960209  |
| 35 | 6 | 0 | 7.951476 | -6.145463 | 0.001801  |
| 36 | 1 | 0 | 7.687148 | -7.156833 | 0.337071  |
| 37 | 1 | 0 | 8.459318 | -6.246235 | -0.962631 |
| 38 | 1 | 0 | 8.664561 | -5.739601 | 0.726301  |
| 39 | 6 | 0 | 4.069078 | -4.415400 | -2.722413 |
| 40 | 1 | 0 | 3.097584 | -4.916499 | -2.642473 |
| 41 | 1 | 0 | 3.869746 | -3.386439 | -3.042251 |
| 42 | 1 | 0 | 4.635854 | -4.913611 | -3.513580 |
| 43 | 6 | 0 | 4.659763 | -2.958915 | 2.123150  |
| 44 | 1 | 0 | 4.751441 | -1.878529 | 1.962297  |
| 45 | 1 | 0 | 3.607458 | -3.155804 | 2.356623  |
| 46 | 1 | 0 | 5.256530 | -3.216253 | 3.002379  |
| 47 | 6 | 0 | 4.820113 | 3.305238  | -2.662792 |
| 48 | 1 | 0 | 4.961339 | 2.226582  | -2.527725 |
| 49 | 1 | 0 | 3.811171 | 3.444204  | -3.067565 |
| 50 | 1 | 0 | 5.537855 | 3.644051  | -3.414721 |

|    |   |   |           |           |           |
|----|---|---|-----------|-----------|-----------|
| 51 | 6 | 0 | 3.311171  | 4.448507  | 2.061483  |
| 52 | 1 | 0 | 2.318342  | 4.846166  | 1.821264  |
| 53 | 1 | 0 | 3.173470  | 3.392420  | 2.320627  |
| 54 | 1 | 0 | 3.674702  | 4.971980  | 2.949831  |
| 55 | 6 | 0 | 7.454190  | 6.591305  | 0.125378  |
| 56 | 1 | 0 | 8.299090  | 6.289920  | -0.501752 |
| 57 | 1 | 0 | 7.166977  | 7.605753  | -0.180436 |
| 58 | 1 | 0 | 7.799014  | 6.651483  | 1.162597  |
| 59 | 7 | 0 | 0.853383  | -1.346563 | -0.547938 |
| 60 | 7 | 0 | 0.758531  | 1.277183  | -0.623775 |
| 61 | 6 | 0 | -0.642769 | -3.251254 | -0.748692 |
| 62 | 6 | 0 | -0.868512 | 3.041136  | -0.955696 |
| 63 | 1 | 0 | -0.808616 | -3.387965 | -1.825183 |
| 64 | 1 | 0 | -0.738702 | -4.233290 | -0.279266 |
| 65 | 1 | 0 | -1.048201 | 4.056475  | -0.600019 |
| 66 | 1 | 0 | -1.021122 | 3.049367  | -2.042976 |
| 67 | 6 | 0 | -2.243331 | -2.558196 | 1.603058  |
| 68 | 6 | 0 | -2.969772 | -1.490752 | 2.444323  |
| 69 | 6 | 0 | -2.887325 | -3.940896 | 1.820635  |
| 70 | 1 | 0 | -1.205320 | -2.600210 | 1.963251  |
| 71 | 6 | 0 | -2.932715 | -1.864310 | 3.933751  |
| 72 | 1 | 0 | -4.013332 | -1.408315 | 2.117279  |
| 73 | 1 | 0 | -2.505584 | -0.514191 | 2.295380  |
| 74 | 6 | 0 | -2.842461 | -4.319399 | 3.310892  |
| 75 | 1 | 0 | -3.933176 | -3.906195 | 1.492129  |
| 76 | 1 | 0 | -2.385853 | -4.710079 | 1.223014  |
| 77 | 6 | 0 | -3.528619 | -3.257022 | 4.181309  |
| 78 | 1 | 0 | -3.472033 | -1.107653 | 4.516787  |
| 79 | 1 | 0 | -1.888286 | -1.845783 | 4.276342  |
| 80 | 1 | 0 | -3.316303 | -5.297532 | 3.457843  |

|     |   |   |           |           |           |
|-----|---|---|-----------|-----------|-----------|
| 81  | 1 | 0 | -1.793352 | -4.423789 | 3.622185  |
| 82  | 1 | 0 | -3.448127 | -3.524418 | 5.241936  |
| 83  | 1 | 0 | -4.601261 | -3.235473 | 3.940344  |
| 84  | 6 | 0 | -3.431230 | -2.401387 | -1.247887 |
| 85  | 6 | 0 | -3.769945 | -3.878581 | -1.534429 |
| 86  | 6 | 0 | -4.676423 | -1.636674 | -0.756856 |
| 87  | 1 | 0 | -3.108323 | -1.943563 | -2.194045 |
| 88  | 6 | 0 | -4.904828 | -3.966188 | -2.569605 |
| 89  | 1 | 0 | -4.088510 | -4.375769 | -0.612795 |
| 90  | 1 | 0 | -2.889743 | -4.415196 | -1.904342 |
| 91  | 6 | 0 | -5.808164 | -1.731075 | -1.790562 |
| 92  | 1 | 0 | -5.015638 | -2.072062 | 0.191498  |
| 93  | 1 | 0 | -4.427051 | -0.589437 | -0.559045 |
| 94  | 6 | 0 | -6.149579 | -3.193140 | -2.110781 |
| 95  | 1 | 0 | -5.154234 | -5.018175 | -2.753276 |
| 96  | 1 | 0 | -4.552071 | -3.551497 | -3.524654 |
| 97  | 1 | 0 | -6.694265 | -1.201161 | -1.420510 |
| 98  | 1 | 0 | -5.493514 | -1.221306 | -2.711144 |
| 99  | 1 | 0 | -6.930934 | -3.241860 | -2.878808 |
| 100 | 1 | 0 | -6.559375 | -3.672776 | -1.210283 |
| 101 | 6 | 0 | -2.573977 | 2.315583  | 1.435417  |
| 102 | 6 | 0 | -2.273033 | 3.777373  | 1.822585  |
| 103 | 6 | 0 | -4.028258 | 1.939383  | 1.790826  |
| 104 | 1 | 0 | -1.908738 | 1.685266  | 2.034275  |
| 105 | 6 | 0 | -2.558198 | 4.002288  | 3.318070  |
| 106 | 1 | 0 | -2.886218 | 4.463083  | 1.224738  |
| 107 | 1 | 0 | -1.224674 | 4.018804  | 1.617890  |
| 108 | 6 | 0 | -4.282944 | 2.148961  | 3.290809  |
| 109 | 1 | 0 | -4.721392 | 2.572583  | 1.223183  |
| 110 | 1 | 0 | -4.240218 | 0.901892  | 1.513211  |

|     |   |   |           |           |           |
|-----|---|---|-----------|-----------|-----------|
| 111 | 6 | 0 | -3.988478 | 3.598656  | 3.700315  |
| 112 | 1 | 0 | -2.375891 | 5.053642  | 3.571608  |
| 113 | 1 | 0 | -1.847544 | 3.406404  | 3.907681  |
| 114 | 1 | 0 | -5.319983 | 1.884923  | 3.530705  |
| 115 | 1 | 0 | -3.638863 | 1.467242  | 3.864218  |
| 116 | 1 | 0 | -4.143736 | 3.730782  | 4.777954  |
| 117 | 1 | 0 | -4.700426 | 4.265467  | 3.192970  |
| 118 | 6 | 0 | -3.620978 | 2.096563  | -1.374735 |
| 119 | 6 | 0 | -4.002286 | 3.589323  | -1.486380 |
| 120 | 6 | 0 | -3.493074 | 1.449738  | -2.767581 |
| 121 | 1 | 0 | -4.430431 | 1.578128  | -0.846491 |
| 122 | 6 | 0 | -5.288900 | 3.768106  | -2.307699 |
| 123 | 1 | 0 | -3.188915 | 4.138778  | -1.977521 |
| 124 | 1 | 0 | -4.133366 | 4.028558  | -0.493172 |
| 125 | 6 | 0 | -4.777968 | 1.652165  | -3.586397 |
| 126 | 1 | 0 | -2.644652 | 1.894205  | -3.306287 |
| 127 | 1 | 0 | -3.280262 | 0.382090  | -2.663871 |
| 128 | 6 | 0 | -5.157462 | 3.134263  | -3.698031 |
| 129 | 1 | 0 | -5.524908 | 4.835832  | -2.391217 |
| 130 | 1 | 0 | -6.125657 | 3.297884  | -1.771696 |
| 131 | 1 | 0 | -4.651441 | 1.210132  | -4.582203 |
| 132 | 1 | 0 | -5.598690 | 1.107431  | -3.099833 |
| 133 | 1 | 0 | -6.093198 | 3.246659  | -4.258888 |
| 134 | 1 | 0 | -4.380425 | 3.666561  | -4.265408 |
| 135 | 1 | 0 | -0.575876 | -0.037543 | 1.253698  |
| 136 | 6 | 0 | 0.418106  | -0.017235 | 2.575735  |
| 137 | 8 | 0 | 0.447745  | 1.140478  | 2.862813  |
| 138 | 8 | 0 | 0.708267  | -1.163838 | 2.732686  |

---

<sup>1</sup>TS11 E(opt) = -3188.643889 hartree

---

| Center<br>Number | Atomic<br>Number | Atomic<br>Type | Coordinates (Angstroms) |           |           |
|------------------|------------------|----------------|-------------------------|-----------|-----------|
|                  |                  |                | X                       | Y         | Z         |
| 1                | 77               | 0              | -0.787672               | -0.099713 | -0.615410 |
| 2                | 1                | 0              | -1.288314               | -0.321783 | -2.154198 |
| 3                | 15               | 0              | -1.863035               | -2.090425 | -0.180559 |
| 4                | 15               | 0              | -2.175260               | 1.724689  | -0.322391 |
| 5                | 6                | 0              | 2.099823                | -0.637066 | -0.621638 |
| 6                | 6                | 0              | 0.822187                | -2.656840 | -0.671182 |
| 7                | 6                | 0              | 3.287359                | -1.395729 | -0.547919 |
| 8                | 6                | 0              | 1.969588                | -3.412243 | -0.569977 |
| 9                | 6                | 0              | 3.242615                | -2.777997 | -0.502583 |
| 10               | 1                | 0              | 4.243139                | -0.885329 | -0.503569 |
| 11               | 1                | 0              | 1.899408                | -4.494597 | -0.562885 |
| 12               | 6                | 0              | 2.009788                | 0.791405  | -0.564994 |
| 13               | 6                | 0              | 0.484256                | 2.639441  | -0.531930 |
| 14               | 6                | 0              | 3.086493                | 1.685032  | -0.396067 |
| 15               | 6                | 0              | 1.525409                | 3.519535  | -0.362376 |
| 16               | 6                | 0              | 2.868684                | 3.046008  | -0.263561 |
| 17               | 1                | 0              | 4.097122                | 1.294454  | -0.349507 |
| 18               | 1                | 0              | 1.322634                | 4.584684  | -0.325241 |
| 19               | 6                | 0              | 4.487223                | -3.592542 | -0.386060 |
| 20               | 6                | 0              | 5.387866                | -3.674624 | -1.469857 |
| 21               | 6                | 0              | 4.764066                | -4.284826 | 0.814013  |
| 22               | 6                | 0              | 6.547343                | -4.448379 | -1.335042 |
| 23               | 6                | 0              | 5.935648                | -5.044290 | 0.907916  |
| 24               | 6                | 0              | 6.839100                | -5.142661 | -0.156387 |
| 25               | 1                | 0              | 7.237421                | -4.512258 | -2.173875 |
| 26               | 1                | 0              | 6.150707                | -5.567512 | 1.837456  |

|    |   |   |          |           |           |
|----|---|---|----------|-----------|-----------|
| 27 | 6 | 0 | 3.994361 | 3.996558  | -0.037991 |
| 28 | 6 | 0 | 4.972892 | 4.198077  | -1.037046 |
| 29 | 6 | 0 | 4.082127 | 4.706087  | 1.182407  |
| 30 | 6 | 0 | 6.017147 | 5.100298  | -0.798019 |
| 31 | 6 | 0 | 5.144085 | 5.595247  | 1.380899  |
| 32 | 6 | 0 | 6.124117 | 5.806259  | 0.404292  |
| 33 | 1 | 0 | 6.762394 | 5.259351  | -1.574804 |
| 34 | 1 | 0 | 5.210532 | 6.133342  | 2.324424  |
| 35 | 6 | 0 | 8.077533 | -5.998705 | -0.043943 |
| 36 | 1 | 0 | 7.863697 | -7.038099 | -0.325629 |
| 37 | 1 | 0 | 8.874558 | -5.641031 | -0.703530 |
| 38 | 1 | 0 | 8.461693 | -6.015092 | 0.981240  |
| 39 | 6 | 0 | 5.117611 | -2.950670 | -2.769691 |
| 40 | 1 | 0 | 4.094630 | -3.124732 | -3.121084 |
| 41 | 1 | 0 | 5.232258 | -1.866199 | -2.660350 |
| 42 | 1 | 0 | 5.808037 | -3.280877 | -3.551175 |
| 43 | 6 | 0 | 3.830900 | -4.193655 | 1.999843  |
| 44 | 1 | 0 | 3.605024 | -3.150934 | 2.250393  |
| 45 | 1 | 0 | 2.870900 | -4.682830 | 1.798982  |
| 46 | 1 | 0 | 4.270184 | -4.669130 | 2.881363  |
| 47 | 6 | 0 | 4.907140 | 3.474933  | -2.364026 |
| 48 | 1 | 0 | 5.200269 | 2.423054  | -2.268236 |
| 49 | 1 | 0 | 3.893318 | 3.482597  | -2.778012 |
| 50 | 1 | 0 | 5.578421 | 3.938452  | -3.092929 |
| 51 | 6 | 0 | 3.062503 | 4.505335  | 2.281054  |
| 52 | 1 | 0 | 2.093379 | 4.947412  | 2.022544  |
| 53 | 1 | 0 | 2.880359 | 3.441524  | 2.470040  |
| 54 | 1 | 0 | 3.398667 | 4.966067  | 3.214387  |
| 55 | 6 | 0 | 7.277859 | 6.747079  | 0.655250  |
| 56 | 1 | 0 | 7.690923 | 7.134607  | -0.281469 |

|    |   |   |           |           |           |
|----|---|---|-----------|-----------|-----------|
| 57 | 1 | 0 | 6.974828  | 7.597834  | 1.274493  |
| 58 | 1 | 0 | 8.093297  | 6.236905  | 1.184602  |
| 59 | 7 | 0 | 0.876628  | -1.288734 | -0.670347 |
| 60 | 7 | 0 | 0.706007  | 1.281695  | -0.563443 |
| 61 | 6 | 0 | -0.552667 | -3.251200 | -0.836954 |
| 62 | 6 | 0 | -0.941549 | 3.064891  | -0.769303 |
| 63 | 1 | 0 | -0.764801 | -3.344354 | -1.911022 |
| 64 | 1 | 0 | -0.612107 | -4.252234 | -0.402759 |
| 65 | 1 | 0 | -1.159046 | 4.029874  | -0.308500 |
| 66 | 1 | 0 | -1.072680 | 3.191607  | -1.852755 |
| 67 | 6 | 0 | -2.021512 | -2.601169 | 1.607589  |
| 68 | 6 | 0 | -2.754004 | -1.559656 | 2.472152  |
| 69 | 6 | 0 | -2.570069 | -4.010507 | 1.897173  |
| 70 | 1 | 0 | -0.963533 | -2.579227 | 1.907380  |
| 71 | 6 | 0 | -2.599302 | -1.887049 | 3.964317  |
| 72 | 1 | 0 | -3.819855 | -1.545163 | 2.211807  |
| 73 | 1 | 0 | -2.361143 | -0.561954 | 2.263545  |
| 74 | 6 | 0 | -2.402919 | -4.349629 | 3.388811  |
| 75 | 1 | 0 | -3.636867 | -4.042586 | 1.643991  |
| 76 | 1 | 0 | -2.069556 | -4.766451 | 1.281921  |
| 77 | 6 | 0 | -3.090768 | -3.306587 | 4.281849  |
| 78 | 1 | 0 | -3.145401 | -1.150074 | 4.566329  |
| 79 | 1 | 0 | -1.538031 | -1.797138 | 4.237597  |
| 80 | 1 | 0 | -2.806671 | -5.349466 | 3.590844  |
| 81 | 1 | 0 | -1.330755 | -4.384960 | 3.629484  |
| 82 | 1 | 0 | -2.923708 | -3.541724 | 5.340188  |
| 83 | 1 | 0 | -4.176662 | -3.354178 | 4.114642  |
| 84 | 6 | 0 | -3.378236 | -2.534800 | -1.165628 |
| 85 | 6 | 0 | -3.712351 | -4.029077 | -1.344379 |
| 86 | 6 | 0 | -4.616810 | -1.748220 | -0.696211 |



|     |   |   |           |           |           |
|-----|---|---|-----------|-----------|-----------|
| 87  | 1 | 0 | -3.095082 | -2.141048 | -2.153090 |
| 88  | 6 | 0 | -4.871115 | -4.195975 | -2.343012 |
| 89  | 1 | 0 | -4.006549 | -4.465650 | -0.384675 |
| 90  | 1 | 0 | -2.835473 | -4.584027 | -1.695868 |
| 91  | 6 | 0 | -5.779901 | -1.922110 | -1.684578 |
| 92  | 1 | 0 | -4.924771 | -2.110403 | 0.293447  |
| 93  | 1 | 0 | -4.372141 | -0.687261 | -0.588898 |
| 94  | 6 | 0 | -6.111999 | -3.405220 | -1.903279 |
| 95  | 1 | 0 | -5.115929 | -5.259635 | -2.452167 |
| 96  | 1 | 0 | -4.546922 | -3.841571 | -3.331994 |
| 97  | 1 | 0 | -6.662389 | -1.381380 | -1.320766 |
| 98  | 1 | 0 | -5.501651 | -1.465592 | -2.645265 |
| 99  | 1 | 0 | -6.913135 | -3.511144 | -2.644988 |
| 100 | 1 | 0 | -6.492966 | -3.829618 | -0.963055 |
| 101 | 6 | 0 | -2.821965 | 2.093201  | 1.407934  |
| 102 | 6 | 0 | -2.626844 | 3.530660  | 1.931665  |
| 103 | 6 | 0 | -4.274619 | 1.617851  | 1.617873  |
| 104 | 1 | 0 | -2.179925 | 1.458105  | 2.020256  |
| 105 | 6 | 0 | -3.044744 | 3.626394  | 3.409618  |
| 106 | 1 | 0 | -3.218851 | 4.240023  | 1.340201  |
| 107 | 1 | 0 | -1.578141 | 3.829262  | 1.836575  |
| 108 | 6 | 0 | -4.663249 | 1.707529  | 3.101477  |
| 109 | 1 | 0 | -4.962674 | 2.243892  | 1.036214  |
| 110 | 1 | 0 | -4.397599 | 0.589725  | 1.262657  |
| 111 | 6 | 0 | -4.480809 | 3.134868  | 3.634461  |
| 112 | 1 | 0 | -2.934608 | 4.660820  | 3.758131  |
| 113 | 1 | 0 | -2.358365 | 3.014296  | 4.011507  |
| 114 | 1 | 0 | -5.700853 | 1.376932  | 3.234449  |
| 115 | 1 | 0 | -4.032502 | 1.018839  | 3.681000  |
| 116 | 1 | 0 | -4.735494 | 3.181134  | 4.700472  |

|     |   |   |           |           |           |
|-----|---|---|-----------|-----------|-----------|
| 117 | 1 | 0 | -5.178788 | 3.805347  | 3.112308  |
| 118 | 6 | 0 | -3.625221 | 2.078585  | -1.453669 |
| 119 | 6 | 0 | -4.079336 | 3.554144  | -1.443440 |
| 120 | 6 | 0 | -3.405066 | 1.591180  | -2.897799 |
| 121 | 1 | 0 | -4.437127 | 1.472317  | -1.032519 |
| 122 | 6 | 0 | -5.340300 | 3.753459  | -2.300412 |
| 123 | 1 | 0 | -3.273852 | 4.185555  | -1.841611 |
| 124 | 1 | 0 | -4.275015 | 3.892938  | -0.422554 |
| 125 | 6 | 0 | -4.665762 | 1.800023  | -3.751570 |
| 126 | 1 | 0 | -2.564404 | 2.136571  | -3.349965 |
| 127 | 1 | 0 | -3.127365 | 0.533624  | -2.894840 |
| 128 | 6 | 0 | -5.127551 | 3.262719  | -3.737738 |
| 129 | 1 | 0 | -5.627603 | 4.812144  | -2.293909 |
| 130 | 1 | 0 | -6.172406 | 3.195989  | -1.846643 |
| 131 | 1 | 0 | -4.474663 | 1.467246  | -4.779364 |
| 132 | 1 | 0 | -5.470873 | 1.162936  | -3.357236 |
| 133 | 1 | 0 | -6.048477 | 3.379542  | -4.322200 |
| 134 | 1 | 0 | -4.362716 | 3.886998  | -4.222100 |
| 135 | 6 | 0 | 0.319527  | 0.187336  | 2.195898  |
| 136 | 8 | 0 | 0.870313  | -0.864113 | 2.318246  |
| 137 | 8 | 0 | 0.033173  | 1.287639  | 2.560294  |

-----

**<sup>1</sup>TS12    E(opt) =-3453.719307 hartree**

-----

| Center<br>Number | Atomic<br>Number | Atomic<br>Type | Coordinates (Angstroms) |          |           |
|------------------|------------------|----------------|-------------------------|----------|-----------|
|                  |                  |                | X                       | Y        | Z         |
| 1                | 77               | 0              | 0.940006                | 0.072398 | -0.520785 |
| 2                | 1                | 0              | 1.340978                | 0.014423 | -2.170572 |
| 3                | 15               | 0              | 2.192426                | 2.004494 | -0.325048 |

|    |    |   |           |           |           |
|----|----|---|-----------|-----------|-----------|
| 4  | 15 | 0 | 2.196370  | -1.836834 | -0.122734 |
| 5  | 6  | 0 | -1.881850 | 0.778579  | -0.877672 |
| 6  | 6  | 0 | -0.504632 | 2.701272  | -0.825789 |
| 7  | 6  | 0 | -3.028165 | 1.564147  | -0.827919 |
| 8  | 6  | 0 | -1.629582 | 3.521250  | -0.755403 |
| 9  | 6  | 0 | -2.911527 | 2.956638  | -0.739358 |
| 10 | 1  | 0 | -4.006816 | 1.102412  | -0.812084 |
| 11 | 1  | 0 | -1.503857 | 4.596826  | -0.696741 |
| 12 | 6  | 0 | -1.871207 | -0.697751 | -0.868876 |
| 13 | 6  | 0 | -0.470365 | -2.594164 | -0.717144 |
| 14 | 6  | 0 | -3.006356 | -1.502738 | -0.890963 |
| 15 | 6  | 0 | -1.582097 | -3.433437 | -0.709116 |
| 16 | 6  | 0 | -2.870592 | -2.890702 | -0.792055 |
| 17 | 1  | 0 | -3.991779 | -1.058483 | -0.944336 |
| 18 | 1  | 0 | -1.442210 | -4.506730 | -0.638599 |
| 19 | 6  | 0 | -4.126494 | 3.811946  | -0.600396 |
| 20 | 6  | 0 | -4.569207 | 4.591086  | -1.689771 |
| 21 | 6  | 0 | -4.824623 | 3.831980  | 0.625719  |
| 22 | 6  | 0 | -5.712589 | 5.381740  | -1.533967 |
| 23 | 6  | 0 | -5.960885 | 4.642738  | 0.738278  |
| 24 | 6  | 0 | -6.420111 | 5.424607  | -0.326722 |
| 25 | 1  | 0 | -6.061435 | 5.974962  | -2.376571 |
| 26 | 1  | 0 | -6.499781 | 4.662987  | 1.682998  |
| 27 | 6  | 0 | -4.072847 | -3.774843 | -0.748559 |
| 28 | 6  | 0 | -4.646184 | -4.242397 | -1.947401 |
| 29 | 6  | 0 | -4.614649 | -4.143367 | 0.499207  |
| 30 | 6  | 0 | -5.765737 | -5.079106 | -1.878127 |
| 31 | 6  | 0 | -5.736199 | -4.980916 | 0.523511  |
| 32 | 6  | 0 | -6.326665 | -5.457339 | -0.652554 |
| 33 | 1  | 0 | -6.207786 | -5.445358 | -2.802255 |

|    |   |   |           |           |           |
|----|---|---|-----------|-----------|-----------|
| 34 | 1 | 0 | -6.156518 | -5.268980 | 1.484722  |
| 35 | 6 | 0 | -7.633464 | 6.309989  | -0.176226 |
| 36 | 1 | 0 | -7.339187 | 7.348725  | 0.021929  |
| 37 | 1 | 0 | -8.239518 | 6.316012  | -1.088417 |
| 38 | 1 | 0 | -8.267347 | 5.984875  | 0.654474  |
| 39 | 6 | 0 | -3.840286 | 4.561505  | -3.013403 |
| 40 | 1 | 0 | -2.831838 | 4.982037  | -2.927826 |
| 41 | 1 | 0 | -3.724015 | 3.536028  | -3.382834 |
| 42 | 1 | 0 | -4.379560 | 5.136585  | -3.771054 |
| 43 | 6 | 0 | -4.354915 | 3.014743  | 1.807463  |
| 44 | 1 | 0 | -4.295772 | 1.947563  | 1.574347  |
| 45 | 1 | 0 | -3.346645 | 3.313698  | 2.120366  |
| 46 | 1 | 0 | -5.024147 | 3.146102  | 2.662606  |
| 47 | 6 | 0 | -4.057440 | -3.855461 | -3.283558 |
| 48 | 1 | 0 | -4.068543 | -2.768392 | -3.425328 |
| 49 | 1 | 0 | -3.010670 | -4.171787 | -3.364346 |
| 50 | 1 | 0 | -4.614020 | -4.310327 | -4.107448 |
| 51 | 6 | 0 | -3.993540 | -3.649726 | 1.785041  |
| 52 | 1 | 0 | -2.973407 | -4.034921 | 1.905390  |
| 53 | 1 | 0 | -3.918734 | -2.556827 | 1.801303  |
| 54 | 1 | 0 | -4.577646 | -3.971156 | 2.652162  |
| 55 | 6 | 0 | -7.559506 | -6.327300 | -0.603463 |
| 56 | 1 | 0 | -7.603483 | -7.009566 | -1.458363 |
| 57 | 1 | 0 | -7.595304 | -6.921868 | 0.314809  |
| 58 | 1 | 0 | -8.471170 | -5.715883 | -0.629968 |
| 59 | 7 | 0 | -0.652857 | 1.362473  | -0.863503 |
| 60 | 7 | 0 | -0.636848 | -1.258909 | -0.783008 |
| 61 | 6 | 0 | 0.902225  | 3.233593  | -0.920094 |
| 62 | 6 | 0 | 0.945135  | -3.100462 | -0.731930 |
| 63 | 1 | 0 | 1.111455  | 3.415862  | -1.981712 |

|    |   |   |          |           |           |
|----|---|---|----------|-----------|-----------|
| 64 | 1 | 0 | 0.994833 | 4.194521  | -0.407527 |
| 65 | 1 | 0 | 1.029485 | -4.062205 | -0.224040 |
| 66 | 1 | 0 | 1.214747 | -3.273569 | -1.781763 |
| 67 | 6 | 0 | 2.647950 | 2.621007  | 1.368828  |
| 68 | 6 | 0 | 3.363380 | 1.555576  | 2.219575  |
| 69 | 6 | 0 | 3.401318 | 3.962106  | 1.425848  |
| 70 | 1 | 0 | 1.650169 | 2.748220  | 1.804498  |
| 71 | 6 | 0 | 3.512692 | 2.031463  | 3.672485  |
| 72 | 1 | 0 | 4.357756 | 1.347088  | 1.806007  |
| 73 | 1 | 0 | 2.796082 | 0.623486  | 2.191427  |
| 74 | 6 | 0 | 3.529473 | 4.438199  | 2.883021  |
| 75 | 1 | 0 | 4.407163 | 3.838453  | 1.006748  |
| 76 | 1 | 0 | 2.893318 | 4.725782  | 0.825854  |
| 77 | 6 | 0 | 4.230297 | 3.385891  | 3.754000  |
| 78 | 1 | 0 | 4.053371 | 1.275745  | 4.255839  |
| 79 | 1 | 0 | 2.512770 | 2.122781  | 4.119646  |
| 80 | 1 | 0 | 4.077525 | 5.387977  | 2.916348  |
| 81 | 1 | 0 | 2.525968 | 4.634659  | 3.286555  |
| 82 | 1 | 0 | 4.285403 | 3.727727  | 4.794900  |
| 83 | 1 | 0 | 5.266319 | 3.265639  | 3.404903  |
| 84 | 6 | 0 | 3.610273 | 2.219473  | -1.514030 |
| 85 | 6 | 0 | 3.987704 | 3.654931  | -1.937387 |
| 86 | 6 | 0 | 4.860594 | 1.449885  | -1.042727 |
| 87 | 1 | 0 | 3.219755 | 1.706762  | -2.403951 |
| 88 | 6 | 0 | 5.050352 | 3.614942  | -3.049475 |
| 89 | 1 | 0 | 4.390221 | 4.207674  | -1.083224 |
| 90 | 1 | 0 | 3.108531 | 4.204173  | -2.290059 |
| 91 | 6 | 0 | 5.923909 | 1.414514  | -2.150657 |
| 92 | 1 | 0 | 5.279488 | 1.947618  | -0.159262 |
| 93 | 1 | 0 | 4.592980 | 0.432746  | -0.740790 |

|     |   |   |          |           |           |
|-----|---|---|----------|-----------|-----------|
| 94  | 6 | 0 | 6.295562 | 2.830569  | -2.612077 |
| 95  | 1 | 0 | 5.323887 | 4.638151  | -3.334617 |
| 96  | 1 | 0 | 4.618434 | 3.140744  | -3.942406 |
| 97  | 1 | 0 | 6.813732 | 0.880184  | -1.795797 |
| 98  | 1 | 0 | 5.531101 | 0.846152  | -3.004273 |
| 99  | 1 | 0 | 7.023799 | 2.785633  | -3.431084 |
| 100 | 1 | 0 | 6.783274 | 3.363368  | -1.783032 |
| 101 | 6 | 0 | 2.625318 | -2.237611 | 1.661059  |
| 102 | 6 | 0 | 2.183879 | -3.622613 | 2.173218  |
| 103 | 6 | 0 | 4.106957 | -1.970971 | 2.001019  |
| 104 | 1 | 0 | 2.016544 | -1.508003 | 2.198511  |
| 105 | 6 | 0 | 2.434599 | -3.735593 | 3.687326  |
| 106 | 1 | 0 | 2.729632 | -4.418992 | 1.650939  |
| 107 | 1 | 0 | 1.118271 | -3.775590 | 1.975228  |
| 108 | 6 | 0 | 4.325964 | -2.061405 | 3.518929  |
| 109 | 1 | 0 | 4.747895 | -2.713408 | 1.510268  |
| 110 | 1 | 0 | 4.419783 | -0.987911 | 1.635940  |
| 111 | 6 | 0 | 3.893405 | -3.432875 | 4.055410  |
| 112 | 1 | 0 | 2.152000 | -4.737136 | 4.034520  |
| 113 | 1 | 0 | 1.778335 | -3.023179 | 4.207032  |
| 114 | 1 | 0 | 5.380507 | -1.871993 | 3.754386  |
| 115 | 1 | 0 | 3.741444 | -1.273454 | 4.014471  |
| 116 | 1 | 0 | 4.027348 | -3.478210 | 5.143194  |
| 117 | 1 | 0 | 4.543703 | -4.207356 | 3.623360  |
| 118 | 6 | 0 | 3.721830 | -2.286692 | -1.107788 |
| 119 | 6 | 0 | 4.045389 | -3.797947 | -1.058088 |
| 120 | 6 | 0 | 3.690764 | -1.789911 | -2.565140 |
| 121 | 1 | 0 | 4.533079 | -1.750958 | -0.600287 |
| 122 | 6 | 0 | 5.370032 | -4.103140 | -1.775287 |
| 123 | 1 | 0 | 3.241929 | -4.359260 | -1.552085 |

|     |   |   |           |           |           |
|-----|---|---|-----------|-----------|-----------|
| 124 | 1 | 0 | 4.094188  | -4.154732 | -0.025892 |
| 125 | 6 | 0 | 5.009820  | -2.113735 | -3.285405 |
| 126 | 1 | 0 | 2.857596  | -2.265141 | -3.101473 |
| 127 | 1 | 0 | 3.506956  | -0.713324 | -2.589963 |
| 128 | 6 | 0 | 5.343648  | -3.609590 | -3.226934 |
| 129 | 1 | 0 | 5.568369  | -5.181307 | -1.738362 |
| 130 | 1 | 0 | 6.192588  | -3.609704 | -1.237930 |
| 131 | 1 | 0 | 4.953532  | -1.771553 | -4.326203 |
| 132 | 1 | 0 | 5.821984  | -1.546697 | -2.810249 |
| 133 | 1 | 0 | 6.305830  | -3.805565 | -3.715806 |
| 134 | 1 | 0 | 4.582643  | -4.173750 | -3.785298 |
| 135 | 6 | 0 | 0.197332  | 0.221824  | 1.509752  |
| 136 | 8 | 0 | -0.039080 | 1.332512  | 2.029234  |
| 137 | 8 | 0 | -0.162767 | -0.897428 | 2.086973  |
| 138 | 6 | 0 | -3.055979 | -0.173755 | 3.108379  |
| 139 | 8 | 0 | -3.353696 | -0.230902 | 1.911616  |
| 140 | 8 | 0 | -3.960358 | 0.304057  | 4.017885  |
| 141 | 8 | 0 | -1.956366 | -0.524926 | 3.682387  |
| 142 | 1 | 0 | -1.110517 | -0.689484 | 2.926021  |
| 143 | 1 | 0 | -4.753963 | 0.523532  | 3.504418  |

-----  
**<sup>1</sup>TS13 E(opt) = -3454.284134 hartree**  
 -----

| Center<br>Number | Atomic<br>Number | Atomic<br>Type | Coordinates (Angstroms) |           |           |
|------------------|------------------|----------------|-------------------------|-----------|-----------|
|                  |                  |                | X                       | Y         | Z         |
| 1                | 77               | 0              | 0.941284                | 0.086178  | -0.426946 |
| 2                | 1                | 0              | 1.348365                | 0.123986  | -1.996225 |
| 3                | 15               | 0              | 2.189155                | 2.050581  | -0.245509 |
| 4                | 15               | 0              | 2.216384                | -1.860680 | -0.219855 |

|    |   |   |           |           |           |
|----|---|---|-----------|-----------|-----------|
| 5  | 6 | 0 | -1.875432 | 0.773459  | -0.870363 |
| 6  | 6 | 0 | -0.505272 | 2.743395  | -0.770283 |
| 7  | 6 | 0 | -3.032159 | 1.595293  | -0.854261 |
| 8  | 6 | 0 | -1.622437 | 3.563119  | -0.746006 |
| 9  | 6 | 0 | -2.920318 | 2.968518  | -0.769343 |
| 10 | 1 | 0 | -4.012186 | 1.133688  | -0.867468 |
| 11 | 1 | 0 | -1.508021 | 4.640448  | -0.712664 |
| 12 | 6 | 0 | -1.858072 | -0.651197 | -0.902290 |
| 13 | 6 | 0 | -0.441169 | -2.594500 | -0.862393 |
| 14 | 6 | 0 | -2.995489 | -1.501669 | -0.908523 |
| 15 | 6 | 0 | -1.538007 | -3.438568 | -0.864095 |
| 16 | 6 | 0 | -2.851132 | -2.872264 | -0.866310 |
| 17 | 1 | 0 | -3.985632 | -1.062854 | -0.890997 |
| 18 | 1 | 0 | -1.399160 | -4.513495 | -0.857734 |
| 19 | 6 | 0 | -4.137006 | 3.829708  | -0.674468 |
| 20 | 6 | 0 | -4.591007 | 4.542343  | -1.803275 |
| 21 | 6 | 0 | -4.827386 | 3.930396  | 0.552783  |
| 22 | 6 | 0 | -5.733401 | 5.343549  | -1.688942 |
| 23 | 6 | 0 | -5.965136 | 4.743149  | 0.624993  |
| 24 | 6 | 0 | -6.433000 | 5.459505  | -0.482602 |
| 25 | 1 | 0 | -6.087245 | 5.885440  | -2.563665 |
| 26 | 1 | 0 | -6.498244 | 4.820007  | 1.570499  |
| 27 | 6 | 0 | -4.040399 | -3.770141 | -0.766297 |
| 28 | 6 | 0 | -4.640004 | -4.293284 | -1.928560 |
| 29 | 6 | 0 | -4.549609 | -4.099990 | 0.507732  |
| 30 | 6 | 0 | -5.749460 | -5.138161 | -1.800095 |
| 31 | 6 | 0 | -5.660401 | -4.947374 | 0.593673  |
| 32 | 6 | 0 | -6.272991 | -5.478492 | -0.547799 |
| 33 | 1 | 0 | -6.215167 | -5.538086 | -2.698520 |
| 34 | 1 | 0 | -6.056997 | -5.198873 | 1.575352  |



|    |   |   |           |           |           |
|----|---|---|-----------|-----------|-----------|
| 35 | 6 | 0 | -7.642933 | 6.355847  | -0.369991 |
| 36 | 1 | 0 | -8.159608 | 6.455767  | -1.329950 |
| 37 | 1 | 0 | -8.357759 | 5.974190  | 0.366288  |
| 38 | 1 | 0 | -7.355657 | 7.365764  | -0.049055 |
| 39 | 6 | 0 | -3.870651 | 4.428518  | -3.126729 |
| 40 | 1 | 0 | -2.841910 | 4.800245  | -3.057218 |
| 41 | 1 | 0 | -3.804588 | 3.384121  | -3.453621 |
| 42 | 1 | 0 | -4.383805 | 4.997665  | -3.906962 |
| 43 | 6 | 0 | -4.344047 | 3.184736  | 1.775723  |
| 44 | 1 | 0 | -4.282999 | 2.106759  | 1.597416  |
| 45 | 1 | 0 | -3.332268 | 3.503384  | 2.057218  |
| 46 | 1 | 0 | -5.002334 | 3.365526  | 2.631075  |
| 47 | 6 | 0 | -4.099755 | -3.940833 | -3.294790 |
| 48 | 1 | 0 | -4.157087 | -2.861687 | -3.479156 |
| 49 | 1 | 0 | -3.043474 | -4.218820 | -3.389381 |
| 50 | 1 | 0 | -4.657273 | -4.450445 | -4.085738 |
| 51 | 6 | 0 | -3.908078 | -3.542132 | 1.757112  |
| 52 | 1 | 0 | -2.857130 | -3.847459 | 1.831771  |
| 53 | 1 | 0 | -3.912958 | -2.447290 | 1.754688  |
| 54 | 1 | 0 | -4.424688 | -3.891311 | 2.656084  |
| 55 | 6 | 0 | -7.448412 | -6.418754 | -0.426973 |
| 56 | 1 | 0 | -8.078157 | -6.392191 | -1.321938 |
| 57 | 1 | 0 | -7.111023 | -7.455428 | -0.296948 |
| 58 | 1 | 0 | -8.071863 | -6.171917 | 0.438680  |
| 59 | 7 | 0 | -0.634199 | 1.400046  | -0.797383 |
| 60 | 7 | 0 | -0.599818 | -1.250401 | -0.842178 |
| 61 | 6 | 0 | 0.906257  | 3.276479  | -0.848238 |
| 62 | 6 | 0 | 0.981260  | -3.088766 | -0.915619 |
| 63 | 1 | 0 | 1.130541  | 3.457384  | -1.906470 |
| 64 | 1 | 0 | 1.001867  | 4.236375  | -0.333974 |

|    |   |   |          |           |           |
|----|---|---|----------|-----------|-----------|
| 65 | 1 | 0 | 1.080586 | -4.077527 | -0.465051 |
| 66 | 1 | 0 | 1.255211 | -3.194198 | -1.972543 |
| 67 | 6 | 0 | 2.625327 | 2.636388  | 1.465284  |
| 68 | 6 | 0 | 3.364207 | 1.566329  | 2.294540  |
| 69 | 6 | 0 | 3.358597 | 3.988222  | 1.558980  |
| 70 | 1 | 0 | 1.629836 | 2.763435  | 1.910344  |
| 71 | 6 | 0 | 3.486855 | 2.007137  | 3.760587  |
| 72 | 1 | 0 | 4.367723 | 1.408976  | 1.881851  |
| 73 | 1 | 0 | 2.840711 | 0.610498  | 2.234248  |
| 74 | 6 | 0 | 3.466467 | 4.432780  | 3.027582  |
| 75 | 1 | 0 | 4.368593 | 3.883281  | 1.145975  |
| 76 | 1 | 0 | 2.845347 | 4.756759  | 0.970499  |
| 77 | 6 | 0 | 4.176237 | 3.373332  | 3.882600  |
| 78 | 1 | 0 | 4.037719 | 1.247690  | 4.329135  |
| 79 | 1 | 0 | 2.480830 | 2.065836  | 4.198759  |
| 80 | 1 | 0 | 3.999236 | 5.389791  | 3.085506  |
| 81 | 1 | 0 | 2.456467 | 4.605685  | 3.425570  |
| 82 | 1 | 0 | 4.210520 | 3.691435  | 4.931704  |
| 83 | 1 | 0 | 5.218709 | 3.281144  | 3.544959  |
| 84 | 6 | 0 | 3.619272 | 2.269494  | -1.415059 |
| 85 | 6 | 0 | 3.987668 | 3.716103  | -1.811194 |
| 86 | 6 | 0 | 4.870244 | 1.505586  | -0.938433 |
| 87 | 1 | 0 | 3.240376 | 1.767219  | -2.316021 |
| 88 | 6 | 0 | 5.071302 | 3.707843  | -2.903037 |
| 89 | 1 | 0 | 4.367399 | 4.259038  | -0.940576 |
| 90 | 1 | 0 | 3.109204 | 4.260564  | -2.171682 |
| 91 | 6 | 0 | 5.951505 | 1.504269  | -2.029350 |
| 92 | 1 | 0 | 5.269105 | 1.993413  | -0.040612 |
| 93 | 1 | 0 | 4.609440 | 0.480698  | -0.657603 |
| 94 | 6 | 0 | 6.317631 | 2.932630  | -2.454262 |

|     |   |   |          |           |           |
|-----|---|---|----------|-----------|-----------|
| 95  | 1 | 0 | 5.335206 | 4.739525  | -3.165333 |
| 96  | 1 | 0 | 4.663003 | 3.243033  | -3.811829 |
| 97  | 1 | 0 | 6.839189 | 0.968367  | -1.671806 |
| 98  | 1 | 0 | 5.577379 | 0.954505  | -2.902488 |
| 99  | 1 | 0 | 7.062683 | 2.911233  | -3.258865 |
| 100 | 1 | 0 | 6.781559 | 3.455486  | -1.605545 |
| 101 | 6 | 0 | 2.638575 | -2.355635 | 1.539206  |
| 102 | 6 | 0 | 2.285068 | -3.796912 | 1.953399  |
| 103 | 6 | 0 | 4.099035 | -2.016849 | 1.906734  |
| 104 | 1 | 0 | 1.988769 | -1.697769 | 2.122898  |
| 105 | 6 | 0 | 2.536706 | -3.992842 | 3.458911  |
| 106 | 1 | 0 | 2.886735 | -4.516027 | 1.383556  |
| 107 | 1 | 0 | 1.233466 | -4.007974 | 1.734804  |
| 108 | 6 | 0 | 4.319916 | -2.194443 | 3.416347  |
| 109 | 1 | 0 | 4.783313 | -2.684434 | 1.369163  |
| 110 | 1 | 0 | 4.347813 | -0.994091 | 1.607272  |
| 111 | 6 | 0 | 3.971859 | -3.622933 | 3.857726  |
| 112 | 1 | 0 | 2.317754 | -5.031161 | 3.736346  |
| 113 | 1 | 0 | 1.833869 | -3.360143 | 4.019147  |
| 114 | 1 | 0 | 5.360176 | -1.956613 | 3.669745  |
| 115 | 1 | 0 | 3.686861 | -1.478147 | 3.959200  |
| 116 | 1 | 0 | 4.103450 | -3.731080 | 4.941239  |
| 117 | 1 | 0 | 4.671760 | -4.324724 | 3.381604  |
| 118 | 6 | 0 | 3.738639 | -2.192429 | -1.245249 |
| 119 | 6 | 0 | 4.109614 | -3.693225 | -1.289887 |
| 120 | 6 | 0 | 3.640692 | -1.608265 | -2.668214 |
| 121 | 1 | 0 | 4.542860 | -1.658504 | -0.725450 |
| 122 | 6 | 0 | 5.404424 | -3.922198 | -2.085102 |
| 123 | 1 | 0 | 3.299899 | -4.256586 | -1.770552 |
| 124 | 1 | 0 | 4.222004 | -4.094949 | -0.279145 |

|     |   |   |           |           |           |
|-----|---|---|-----------|-----------|-----------|
| 125 | 6 | 0 | 4.931590  | -1.865837 | -3.462469 |
| 126 | 1 | 0 | 2.793947  | -2.062940 | -3.200580 |
| 127 | 1 | 0 | 3.442530  | -0.534712 | -2.617538 |
| 128 | 6 | 0 | 5.292200  | -3.355438 | -3.505352 |
| 129 | 1 | 0 | 5.631184  | -4.994868 | -2.113421 |
| 130 | 1 | 0 | 6.239872  | -3.433482 | -1.563673 |
| 131 | 1 | 0 | 4.822713  | -1.464190 | -4.477371 |
| 132 | 1 | 0 | 5.755980  | -1.315068 | -2.990687 |
| 133 | 1 | 0 | 6.230927  | -3.504617 | -4.052594 |
| 134 | 1 | 0 | 4.513029  | -3.904666 | -4.053337 |
| 135 | 6 | 0 | 0.301026  | 0.167815  | 1.590360  |
| 136 | 8 | 0 | 0.205706  | 0.899937  | 2.499895  |
| 137 | 8 | 0 | -0.486365 | -1.421560 | 2.161722  |
| 138 | 6 | 0 | -3.184810 | -0.152134 | 3.141821  |
| 139 | 8 | 0 | -3.447704 | -0.107453 | 1.933583  |
| 140 | 8 | 0 | -4.002200 | 0.478029  | 4.043219  |
| 141 | 8 | 0 | -2.201280 | -0.744484 | 3.719085  |
| 142 | 1 | 0 | -1.368028 | -1.098127 | 2.913190  |
| 143 | 1 | 0 | -4.717209 | 0.870590  | 3.517939  |
| 144 | 1 | 0 | -0.907513 | -1.804031 | 1.378972  |

-----  
**<sup>1</sup>TS14    E(opt) = -3454.18761834 hartree**  
 -----

| Center<br>Number | Atomic<br>Number | Atomic<br>Type | Coordinates (Angstroms) |           |           |
|------------------|------------------|----------------|-------------------------|-----------|-----------|
|                  |                  |                | X                       | Y         | Z         |
| 1                | 77               | 0              | 0.904921                | 0.087678  | -0.315131 |
| 2                | 1                | 0              | 1.223487                | 0.131503  | -1.897920 |
| 3                | 15               | 0              | 2.175152                | 2.041203  | -0.219597 |
| 4                | 15               | 0              | 2.224228                | -1.836030 | -0.213610 |

|    |   |   |           |           |           |
|----|---|---|-----------|-----------|-----------|
| 5  | 6 | 0 | -1.914198 | 0.798382  | -0.723152 |
| 6  | 6 | 0 | -0.542431 | 2.727764  | -0.688440 |
| 7  | 6 | 0 | -3.059735 | 1.580313  | -0.794556 |
| 8  | 6 | 0 | -1.670887 | 3.546841  | -0.723032 |
| 9  | 6 | 0 | -2.948350 | 2.975586  | -0.758119 |
| 10 | 1 | 0 | -4.037708 | 1.118718  | -0.840010 |
| 11 | 1 | 0 | -1.549533 | 4.624320  | -0.723322 |
| 12 | 6 | 0 | -1.900882 | -0.679518 | -0.698728 |
| 13 | 6 | 0 | -0.498840 | -2.585881 | -0.626980 |
| 14 | 6 | 0 | -3.035299 | -1.482257 | -0.706658 |
| 15 | 6 | 0 | -1.613509 | -3.422022 | -0.604484 |
| 16 | 6 | 0 | -2.903885 | -2.874380 | -0.630968 |
| 17 | 1 | 0 | -4.020016 | -1.034857 | -0.738803 |
| 18 | 1 | 0 | -1.472234 | -4.495721 | -0.558519 |
| 19 | 6 | 0 | -4.175376 | 3.823758  | -0.732529 |
| 20 | 6 | 0 | -4.635981 | 4.435815  | -1.915057 |
| 21 | 6 | 0 | -4.865281 | 3.995687  | 0.485145  |
| 22 | 6 | 0 | -5.794809 | 5.217705  | -1.859869 |
| 23 | 6 | 0 | -6.019076 | 4.788348  | 0.494632  |
| 24 | 6 | 0 | -6.501220 | 5.404255  | -0.665687 |
| 25 | 1 | 0 | -6.155058 | 5.690198  | -2.771115 |
| 26 | 1 | 0 | -6.551706 | 4.929272  | 1.432613  |
| 27 | 6 | 0 | -4.109604 | -3.748061 | -0.566311 |
| 28 | 6 | 0 | -4.414736 | -4.608451 | -1.640603 |
| 29 | 6 | 0 | -4.938238 | -3.706873 | 0.578638  |
| 30 | 6 | 0 | -5.554569 | -5.417874 | -1.553423 |
| 31 | 6 | 0 | -6.058524 | -4.541441 | 0.624842  |
| 32 | 6 | 0 | -6.386616 | -5.401619 | -0.430634 |
| 33 | 1 | 0 | -5.796451 | -6.074965 | -2.385630 |
| 34 | 1 | 0 | -6.691956 | -4.521692 | 1.509142  |

|    |   |   |           |           |           |
|----|---|---|-----------|-----------|-----------|
| 35 | 6 | 0 | -7.768115 | 6.224541  | -0.638520 |
| 36 | 1 | 0 | -7.733835 | 7.038860  | -1.369416 |
| 37 | 1 | 0 | -8.640587 | 5.605189  | -0.884071 |
| 38 | 1 | 0 | -7.944668 | 6.657433  | 0.351095  |
| 39 | 6 | 0 | -3.900623 | 4.244882  | -3.220770 |
| 40 | 1 | 0 | -2.881338 | 4.645008  | -3.169636 |
| 41 | 1 | 0 | -3.809932 | 3.182088  | -3.474786 |
| 42 | 1 | 0 | -4.419130 | 4.746734  | -4.042028 |
| 43 | 6 | 0 | -4.354507 | 3.371114  | 1.763196  |
| 44 | 1 | 0 | -4.150453 | 2.300977  | 1.652266  |
| 45 | 1 | 0 | -3.406198 | 3.831088  | 2.070323  |
| 46 | 1 | 0 | -5.070066 | 3.507437  | 2.579178  |
| 47 | 6 | 0 | -3.551076 | -4.661647 | -2.880590 |
| 48 | 1 | 0 | -3.312466 | -3.658736 | -3.251061 |
| 49 | 1 | 0 | -2.596819 | -5.165080 | -2.686702 |
| 50 | 1 | 0 | -4.055710 | -5.208323 | -3.681822 |
| 51 | 6 | 0 | -4.627512 | -2.801061 | 1.748417  |
| 52 | 1 | 0 | -3.591401 | -2.906546 | 2.086154  |
| 53 | 1 | 0 | -4.763071 | -1.745307 | 1.493533  |
| 54 | 1 | 0 | -5.282000 | -3.023921 | 2.595309  |
| 55 | 6 | 0 | -7.615540 | -6.274043 | -0.351076 |
| 56 | 1 | 0 | -7.666601 | -6.975567 | -1.188867 |
| 57 | 1 | 0 | -7.631064 | -6.852167 | 0.579930  |
| 58 | 1 | 0 | -8.529638 | -5.667612 | -0.364894 |
| 59 | 7 | 0 | -0.693067 | 1.390140  | -0.645741 |
| 60 | 7 | 0 | -0.667318 | -1.247254 | -0.636346 |
| 61 | 6 | 0 | 0.864426  | 3.260515  | -0.782510 |
| 62 | 6 | 0 | 0.914350  | -3.103480 | -0.684567 |
| 63 | 1 | 0 | 1.057734  | 3.462553  | -1.842867 |
| 64 | 1 | 0 | 0.960546  | 4.213808  | -0.256845 |

|    |   |   |          |           |           |
|----|---|---|----------|-----------|-----------|
| 65 | 1 | 0 | 1.017207 | -4.026702 | -0.111871 |
| 66 | 1 | 0 | 1.113529 | -3.365041 | -1.730496 |
| 67 | 6 | 0 | 2.679575 | 2.657749  | 1.459658  |
| 68 | 6 | 0 | 3.463883 | 1.615621  | 2.283093  |
| 69 | 6 | 0 | 3.411179 | 4.014671  | 1.479673  |
| 70 | 1 | 0 | 1.703480 | 2.794332  | 1.943899  |
| 71 | 6 | 0 | 3.641817 | 2.098834  | 3.730055  |
| 72 | 1 | 0 | 4.451412 | 1.460825  | 1.834480  |
| 73 | 1 | 0 | 2.953059 | 0.651157  | 2.270750  |
| 74 | 6 | 0 | 3.581644 | 4.502015  | 2.928545  |
| 75 | 1 | 0 | 4.401206 | 3.897988  | 1.023987  |
| 76 | 1 | 0 | 2.870417 | 4.765451  | 0.893344  |
| 77 | 6 | 0 | 4.330122 | 3.469847  | 3.783592  |
| 78 | 1 | 0 | 4.219424 | 1.357679  | 4.295750  |
| 79 | 1 | 0 | 2.654514 | 2.166266  | 4.207715  |
| 80 | 1 | 0 | 4.114432 | 5.460548  | 2.933278  |
| 81 | 1 | 0 | 2.589472 | 4.686452  | 3.364168  |
| 82 | 1 | 0 | 4.406077 | 3.818606  | 4.820546  |
| 83 | 1 | 0 | 5.357960 | 3.370254  | 3.405967  |
| 84 | 6 | 0 | 3.551689 | 2.205905  | -1.455200 |
| 85 | 6 | 0 | 3.914951 | 3.630674  | -1.925564 |
| 86 | 6 | 0 | 4.813931 | 1.453880  | -0.988930 |
| 87 | 1 | 0 | 3.135530 | 1.668316  | -2.317993 |
| 88 | 6 | 0 | 4.952573 | 3.557582  | -3.059686 |
| 89 | 1 | 0 | 4.334370 | 4.205861  | -1.094538 |
| 90 | 1 | 0 | 3.028583 | 4.168841  | -2.276270 |
| 91 | 6 | 0 | 5.846617 | 1.382468  | -2.122643 |
| 92 | 1 | 0 | 5.253769 | 1.986078  | -0.136927 |
| 93 | 1 | 0 | 4.556046 | 0.450225  | -0.639276 |
| 94 | 6 | 0 | 6.208004 | 2.784458  | -2.631938 |

|     |   |   |          |           |           |
|-----|---|---|----------|-----------|-----------|
| 95  | 1 | 0 | 5.218199 | 4.572856  | -3.377598 |
| 96  | 1 | 0 | 4.498847 | 3.060313  | -3.928805 |
| 97  | 1 | 0 | 6.743165 | 0.855222  | -1.774904 |
| 98  | 1 | 0 | 5.429838 | 0.793036  | -2.949680 |
| 99  | 1 | 0 | 6.914235 | 2.715663  | -3.468085 |
| 100 | 1 | 0 | 6.717108 | 3.338957  | -1.830717 |
| 101 | 6 | 0 | 2.903338 | -2.256958 | 1.480654  |
| 102 | 6 | 0 | 2.692586 | -3.699242 | 1.980412  |
| 103 | 6 | 0 | 4.381530 | -1.832561 | 1.621859  |
| 104 | 1 | 0 | 2.308362 | -1.610895 | 2.132400  |
| 105 | 6 | 0 | 3.169299 | -3.827228 | 3.438304  |
| 106 | 1 | 0 | 3.243853 | -4.406129 | 1.348581  |
| 107 | 1 | 0 | 1.633841 | -3.972363 | 1.926425  |
| 108 | 6 | 0 | 4.824760 | -1.944250 | 3.087865  |
| 109 | 1 | 0 | 5.016195 | -2.484878 | 1.010142  |
| 110 | 1 | 0 | 4.528971 | -0.811392 | 1.259400  |
| 111 | 6 | 0 | 4.624408 | -3.372093 | 3.613627  |
| 112 | 1 | 0 | 3.049032 | -4.864724 | 3.772550  |
| 113 | 1 | 0 | 2.520761 | -3.210782 | 4.076513  |
| 114 | 1 | 0 | 5.875351 | -1.643694 | 3.179923  |
| 115 | 1 | 0 | 4.236550 | -1.242711 | 3.696107  |
| 116 | 1 | 0 | 4.915449 | -3.435335 | 4.669084  |
| 117 | 1 | 0 | 5.286133 | -4.053622 | 3.060057  |
| 118 | 6 | 0 | 3.578567 | -2.171700 | -1.451191 |
| 119 | 6 | 0 | 3.992180 | -3.662218 | -1.481321 |
| 120 | 6 | 0 | 3.236144 | -1.661453 | -2.865109 |
| 121 | 1 | 0 | 4.434070 | -1.591149 | -1.088019 |
| 122 | 6 | 0 | 5.148023 | -3.895056 | -2.466979 |
| 123 | 1 | 0 | 3.138746 | -4.277899 | -1.791795 |
| 124 | 1 | 0 | 4.285846 | -4.001969 | -0.484844 |



|     |   |   |           |           |           |
|-----|---|---|-----------|-----------|-----------|
| 125 | 6 | 0 | 4.385770  | -1.931977 | -3.849194 |
| 126 | 1 | 0 | 2.325696  | -2.156643 | -3.229795 |
| 127 | 1 | 0 | 3.022479  | -0.590075 | -2.831614 |
| 128 | 6 | 0 | 4.784717  | -3.411956 | -3.875501 |
| 129 | 1 | 0 | 5.406969  | -4.960544 | -2.477692 |
| 130 | 1 | 0 | 6.037629  | -3.353894 | -2.114723 |
| 131 | 1 | 0 | 4.094356  | -1.591175 | -4.850086 |
| 132 | 1 | 0 | 5.257691  | -1.334346 | -3.551868 |
| 133 | 1 | 0 | 5.625189  | -3.567327 | -4.562567 |
| 134 | 1 | 0 | 3.945284  | -4.010345 | -4.257951 |
| 135 | 6 | 0 | 0.411424  | 0.171006  | 1.743465  |
| 136 | 8 | 0 | 0.309258  | 0.898999  | 2.649026  |
| 137 | 8 | 0 | -0.139349 | -1.507247 | 2.437905  |
| 138 | 6 | 0 | -2.963943 | -0.292907 | 3.100571  |
| 139 | 8 | 0 | -2.836918 | 0.233362  | 1.987051  |
| 140 | 8 | 0 | -4.083149 | -0.043474 | 3.846847  |
| 141 | 8 | 0 | -2.155173 | -1.091441 | 3.697729  |
| 142 | 1 | 0 | -1.141265 | -1.282383 | 3.041525  |
| 143 | 1 | 0 | -4.626855 | 0.557785  | 3.313335  |
| 144 | 1 | 0 | -0.393534 | -2.094014 | 1.711935  |

-----  
**<sup>1</sup>TS15    E(opt) = -3377.72450017 hartree**  
-----

| Center<br>Number | Atomic<br>Number | Atomic<br>Type | Coordinates (Angstroms) |           |           |
|------------------|------------------|----------------|-------------------------|-----------|-----------|
|                  |                  |                | X                       | Y         | Z         |
| 1                | 77               | 0              | 0.791515                | 0.095238  | -0.152097 |
| 2                | 1                | 0              | 0.905982                | -0.026438 | -1.761236 |
| 3                | 15               | 0              | 2.102178                | 2.009745  | -0.385687 |
| 4                | 15               | 0              | 2.077439                | -1.844557 | -0.029470 |

|    |   |   |           |           |           |
|----|---|---|-----------|-----------|-----------|
| 5  | 6 | 0 | -2.043221 | 0.851002  | -0.333602 |
| 6  | 6 | 0 | -0.637980 | 2.739307  | -0.584794 |
| 7  | 6 | 0 | -3.173980 | 1.658547  | -0.324647 |
| 8  | 6 | 0 | -1.748362 | 3.584110  | -0.569901 |
| 9  | 6 | 0 | -3.032767 | 3.050347  | -0.419917 |
| 10 | 1 | 0 | -4.160655 | 1.221585  | -0.232142 |
| 11 | 1 | 0 | -1.606442 | 4.653649  | -0.677482 |
| 12 | 6 | 0 | -2.057138 | -0.626339 | -0.270021 |
| 13 | 6 | 0 | -0.692889 | -2.554986 | -0.192225 |
| 14 | 6 | 0 | -3.205236 | -1.405353 | -0.316391 |
| 15 | 6 | 0 | -1.824363 | -3.370155 | -0.223264 |
| 16 | 6 | 0 | -3.101499 | -2.804478 | -0.290737 |
| 17 | 1 | 0 | -4.179309 | -0.938525 | -0.389276 |
| 18 | 1 | 0 | -1.700663 | -4.446615 | -0.198627 |
| 19 | 6 | 0 | -4.230717 | 3.936981  | -0.365675 |
| 20 | 6 | 0 | -4.721972 | 4.528183  | -1.547204 |
| 21 | 6 | 0 | -4.864171 | 4.168573  | 0.872517  |
| 22 | 6 | 0 | -5.851763 | 5.349840  | -1.467665 |
| 23 | 6 | 0 | -5.987165 | 5.002564  | 0.906502  |
| 24 | 6 | 0 | -6.495707 | 5.602675  | -0.251016 |
| 25 | 1 | 0 | -6.239328 | 5.800212  | -2.378801 |
| 26 | 1 | 0 | -6.476095 | 5.187024  | 1.860490  |
| 27 | 6 | 0 | -4.321411 | -3.658038 | -0.366830 |
| 28 | 6 | 0 | -4.521888 | -4.488958 | -1.492027 |
| 29 | 6 | 0 | -5.272576 | -3.628311 | 0.677300  |
| 30 | 6 | 0 | -5.673496 | -5.281298 | -1.548973 |
| 31 | 6 | 0 | -6.402465 | -4.448562 | 0.580781  |
| 32 | 6 | 0 | -6.624244 | -5.278690 | -0.522830 |
| 33 | 1 | 0 | -5.831776 | -5.915150 | -2.418760 |
| 34 | 1 | 0 | -7.127065 | -4.438547 | 1.391990  |

|    |   |   |           |           |           |
|----|---|---|-----------|-----------|-----------|
| 35 | 6 | 0 | -7.690118 | 6.522984  | -0.184583 |
| 36 | 1 | 0 | -7.373993 | 7.562427  | -0.027361 |
| 37 | 1 | 0 | -8.268366 | 6.497215  | -1.113665 |
| 38 | 1 | 0 | -8.355354 | 6.257482  | 0.643085  |
| 39 | 6 | 0 | -4.059779 | 4.269481  | -2.880612 |
| 40 | 1 | 0 | -3.043812 | 4.679715  | -2.911977 |
| 41 | 1 | 0 | -3.973594 | 3.195544  | -3.082988 |
| 42 | 1 | 0 | -4.629620 | 4.723893  | -3.695453 |
| 43 | 6 | 0 | -4.340859 | 3.541545  | 2.144217  |
| 44 | 1 | 0 | -4.431902 | 2.449358  | 2.123224  |
| 45 | 1 | 0 | -3.278154 | 3.765865  | 2.293303  |
| 46 | 1 | 0 | -4.890419 | 3.906557  | 3.015984  |
| 47 | 6 | 0 | -3.536654 | -4.528972 | -2.639294 |
| 48 | 1 | 0 | -3.217468 | -3.524355 | -2.936659 |
| 49 | 1 | 0 | -2.630689 | -5.087152 | -2.376613 |
| 50 | 1 | 0 | -3.981052 | -5.015831 | -3.511721 |
| 51 | 6 | 0 | -5.088209 | -2.753675 | 1.896617  |
| 52 | 1 | 0 | -4.080292 | -2.840178 | 2.313193  |
| 53 | 1 | 0 | -5.244037 | -1.694613 | 1.660063  |
| 54 | 1 | 0 | -5.808095 | -3.023472 | 2.674600  |
| 55 | 6 | 0 | -7.870976 | -6.123131 | -0.621004 |
| 56 | 1 | 0 | -7.685802 | -7.048239 | -1.176190 |
| 57 | 1 | 0 | -8.255973 | -6.386337 | 0.369148  |
| 58 | 1 | 0 | -8.668208 | -5.582668 | -1.147738 |
| 59 | 7 | 0 | -0.807335 | 1.413921  | -0.423395 |
| 60 | 7 | 0 | -0.830617 | -1.217186 | -0.203681 |
| 61 | 6 | 0 | 0.759018  | 3.229425  | -0.864836 |
| 62 | 6 | 0 | 0.703497  | -3.123036 | -0.200801 |
| 63 | 1 | 0 | 0.829902  | 3.380641  | -1.948495 |
| 64 | 1 | 0 | 0.933392  | 4.203581  | -0.400869 |

|    |   |   |          |           |           |
|----|---|---|----------|-----------|-----------|
| 65 | 1 | 0 | 0.796771 | -3.909749 | 0.551672  |
| 66 | 1 | 0 | 0.849266 | -3.615484 | -1.168080 |
| 67 | 6 | 0 | 2.832888 | 2.751926  | 1.155376  |
| 68 | 6 | 0 | 3.669094 | 1.753641  | 1.979561  |
| 69 | 6 | 0 | 3.611210 | 4.067921  | 0.956251  |
| 70 | 1 | 0 | 1.928354 | 2.980392  | 1.733973  |
| 71 | 6 | 0 | 4.044485 | 2.359727  | 3.339974  |
| 72 | 1 | 0 | 4.585823 | 1.503848  | 1.434000  |
| 73 | 1 | 0 | 3.119228 | 0.821500  | 2.123995  |
| 74 | 6 | 0 | 3.977668 | 4.677462  | 2.320013  |
| 75 | 1 | 0 | 4.532278 | 3.862398  | 0.398669  |
| 76 | 1 | 0 | 3.029601 | 4.787065  | 0.369243  |
| 77 | 6 | 0 | 4.786872 | 3.693035  | 3.175710  |
| 78 | 1 | 0 | 4.658323 | 1.646056  | 3.902674  |
| 79 | 1 | 0 | 3.127820 | 2.521976  | 3.924066  |
| 80 | 1 | 0 | 4.541986 | 5.605346  | 2.167613  |
| 81 | 1 | 0 | 3.054556 | 4.949324  | 2.851196  |
| 82 | 1 | 0 | 5.004610 | 4.131846  | 4.156879  |
| 83 | 1 | 0 | 5.755117 | 3.507244  | 2.688954  |
| 84 | 6 | 0 | 3.305534 | 2.030422  | -1.802178 |
| 85 | 6 | 0 | 3.631172 | 3.401211  | -2.433330 |
| 86 | 6 | 0 | 4.602813 | 1.279619  | -1.442864 |
| 87 | 1 | 0 | 2.767524 | 1.437161  | -2.554352 |
| 88 | 6 | 0 | 4.513287 | 3.209339  | -3.679566 |
| 89 | 1 | 0 | 4.164354 | 4.029621  | -1.713622 |
| 90 | 1 | 0 | 2.717373 | 3.934816  | -2.712846 |
| 91 | 6 | 0 | 5.482640 | 1.094014  | -2.687309 |
| 92 | 1 | 0 | 5.157594 | 1.857645  | -0.693994 |
| 93 | 1 | 0 | 4.371202 | 0.310879  | -0.992667 |
| 94 | 6 | 0 | 5.800508 | 2.441090  | -3.349756 |

|     |   |   |          |           |           |
|-----|---|---|----------|-----------|-----------|
| 95  | 1 | 0 | 4.751561 | 4.188446  | -4.111935 |
| 96  | 1 | 0 | 3.944729 | 2.655336  | -4.440050 |
| 97  | 1 | 0 | 6.406418 | 0.570703  | -2.412547 |
| 98  | 1 | 0 | 4.954476 | 0.453594  | -3.405843 |
| 99  | 1 | 0 | 6.394598 | 2.287729  | -4.258690 |
| 100 | 1 | 0 | 6.415204 | 3.043999  | -2.666167 |
| 101 | 6 | 0 | 2.969498 | -2.115882 | 1.600892  |
| 102 | 6 | 0 | 2.812863 | -3.491558 | 2.280192  |
| 103 | 6 | 0 | 4.459933 | -1.721897 | 1.501265  |
| 104 | 1 | 0 | 2.495002 | -1.376216 | 2.254749  |
| 105 | 6 | 0 | 3.468578 | -3.468904 | 3.672067  |
| 106 | 1 | 0 | 3.276143 | -4.271069 | 1.663967  |
| 107 | 1 | 0 | 1.756344 | -3.759835 | 2.389644  |
| 108 | 6 | 0 | 5.090691 | -1.684332 | 2.900765  |
| 109 | 1 | 0 | 4.996676 | -2.455819 | 0.889029  |
| 110 | 1 | 0 | 4.570834 | -0.751045 | 1.011673  |
| 111 | 6 | 0 | 4.939839 | -3.037232 | 3.609276  |
| 112 | 1 | 0 | 3.378052 | -4.459176 | 4.133894  |
| 113 | 1 | 0 | 2.912859 | -2.767990 | 4.310981  |
| 114 | 1 | 0 | 6.148679 | -1.407749 | 2.820159  |
| 115 | 1 | 0 | 4.599737 | -0.901300 | 3.495343  |
| 116 | 1 | 0 | 5.362178 | -2.988287 | 4.620077  |
| 117 | 1 | 0 | 5.515692 | -3.795883 | 3.060271  |
| 118 | 6 | 0 | 3.268121 | -2.327306 | -1.380655 |
| 119 | 6 | 0 | 3.682931 | -3.815768 | -1.304084 |
| 120 | 6 | 0 | 2.747486 | -1.967656 | -2.786146 |
| 121 | 1 | 0 | 4.159065 | -1.718936 | -1.188654 |
| 122 | 6 | 0 | 4.710586 | -4.157041 | -2.394681 |
| 123 | 1 | 0 | 2.802853 | -4.456114 | -1.442090 |
| 124 | 1 | 0 | 4.098554 | -4.052137 | -0.321424 |

|     |   |   |           |           |           |
|-----|---|---|-----------|-----------|-----------|
| 125 | 6 | 0 | 3.766392  | -2.348385 | -3.872423 |
| 126 | 1 | 0 | 1.801057  | -2.492762 | -2.976859 |
| 127 | 1 | 0 | 2.532862  | -0.897116 | -2.839691 |
| 128 | 6 | 0 | 4.171831  | -3.824545 | -3.790615 |
| 129 | 1 | 0 | 4.975191  | -5.218824 | -2.324452 |
| 130 | 1 | 0 | 5.632087  | -3.585671 | -2.213910 |
| 131 | 1 | 0 | 3.348738  | -2.115201 | -4.859302 |
| 132 | 1 | 0 | 4.663557  | -1.726648 | -3.752474 |
| 133 | 1 | 0 | 4.922556  | -4.055549 | -4.555870 |
| 134 | 1 | 0 | 3.297078  | -4.456610 | -4.000935 |
| 135 | 6 | 0 | 0.505521  | 0.425344  | 1.921812  |
| 136 | 8 | 0 | 0.411979  | 1.316735  | 2.676297  |
| 137 | 8 | 0 | 0.016485  | -1.053784 | 2.864039  |
| 138 | 1 | 0 | 0.355153  | -1.862750 | 2.449991  |
| 139 | 6 | 0 | -1.714492 | -1.393394 | 2.967533  |
| 140 | 8 | 0 | -2.303713 | -0.345628 | 2.998112  |
| 141 | 8 | 0 | -1.813408 | -2.598389 | 2.991061  |

-----  
**<sup>1</sup>TS16     E(opt) = -3187.960285 hartree**

| Center<br>Number | Atomic<br>Number | Atomic<br>Type | Coordinates (Angstroms) |           |           |
|------------------|------------------|----------------|-------------------------|-----------|-----------|
|                  |                  |                | X                       | Y         | Z         |
| 1                | 77               | 0              | -0.755894               | -0.045089 | -0.320990 |
| 2                | 15               | 0              | -1.965464               | -1.987387 | -0.173731 |
| 3                | 15               | 0              | -2.074457               | 1.839229  | -0.251550 |
| 4                | 6                | 0              | 2.090197                | -0.725379 | -0.379452 |
| 5                | 6                | 0              | 0.739138                | -2.660757 | -0.537805 |
| 6                | 6                | 0              | 3.244062                | -1.500279 | -0.337528 |
| 7                | 6                | 0              | 1.872064                | -3.470626 | -0.482992 |

|    |   |   |          |           |           |
|----|---|---|----------|-----------|-----------|
| 8  | 6 | 0 | 3.145658 | -2.897734 | -0.377339 |
| 9  | 1 | 0 | 4.217716 | -1.030767 | -0.265294 |
| 10 | 1 | 0 | 1.759617 | -4.547915 | -0.535492 |
| 11 | 6 | 0 | 2.059973 | 0.752075  | -0.338332 |
| 12 | 6 | 0 | 0.632573 | 2.636900  | -0.435459 |
| 13 | 6 | 0 | 3.177212 | 1.570108  | -0.208673 |
| 14 | 6 | 0 | 1.727785 | 3.488018  | -0.299357 |
| 15 | 6 | 0 | 3.019745 | 2.962369  | -0.174068 |
| 16 | 1 | 0 | 4.166230 | 1.137753  | -0.117439 |
| 17 | 1 | 0 | 1.571194 | 4.561069  | -0.297730 |
| 18 | 6 | 0 | 4.368254 | -3.749497 | -0.313797 |
| 19 | 6 | 0 | 5.244376 | -3.803483 | -1.417926 |
| 20 | 6 | 0 | 4.642936 | -4.491138 | 0.854523  |
| 21 | 6 | 0 | 6.384964 | -4.610067 | -1.334671 |
| 22 | 6 | 0 | 5.799073 | -5.278231 | 0.897118  |
| 23 | 6 | 0 | 6.680018 | -5.354998 | -0.187606 |
| 24 | 1 | 0 | 7.058724 | -4.656987 | -2.187444 |
| 25 | 1 | 0 | 6.018250 | -5.841878 | 1.801386  |
| 26 | 6 | 0 | 4.199976 | 3.858333  | -0.006265 |
| 27 | 6 | 0 | 5.118141 | 4.017639  | -1.065975 |
| 28 | 6 | 0 | 4.388403 | 4.542450  | 1.212488  |
| 29 | 6 | 0 | 6.213059 | 4.869378  | -0.886478 |
| 30 | 6 | 0 | 5.502423 | 5.378780  | 1.350930  |
| 31 | 6 | 0 | 6.425677 | 5.555497  | 0.314986  |
| 32 | 1 | 0 | 6.915849 | 5.002210  | -1.706148 |
| 33 | 1 | 0 | 5.652145 | 5.902714  | 2.292352  |
| 34 | 6 | 0 | 7.900355 | -6.241328 | -0.132194 |
| 35 | 1 | 0 | 7.661777 | -7.256809 | -0.474285 |
| 36 | 1 | 0 | 8.701264 | -5.862119 | -0.774716 |
| 37 | 1 | 0 | 8.288042 | -6.326287 | 0.887994  |

|    |   |   |           |           |           |
|----|---|---|-----------|-----------|-----------|
| 38 | 6 | 0 | 4.963850  | -3.018751 | -2.679106 |
| 39 | 1 | 0 | 3.942283  | -3.186976 | -3.038267 |
| 40 | 1 | 0 | 5.068017  | -1.939960 | -2.514750 |
| 41 | 1 | 0 | 5.655709  | -3.302112 | -3.476894 |
| 42 | 6 | 0 | 3.723254  | -4.430916 | 2.052735  |
| 43 | 1 | 0 | 3.507504  | -3.396220 | 2.342488  |
| 44 | 1 | 0 | 2.758802  | -4.908587 | 1.844630  |
| 45 | 1 | 0 | 4.168315  | -4.939368 | 2.912295  |
| 46 | 6 | 0 | 4.924293  | 3.301434  | -2.382959 |
| 47 | 1 | 0 | 5.065183  | 2.219433  | -2.277737 |
| 48 | 1 | 0 | 3.913123  | 3.452009  | -2.777680 |
| 49 | 1 | 0 | 5.637971  | 3.658970  | -3.130180 |
| 50 | 6 | 0 | 3.420887  | 4.375330  | 2.362005  |
| 51 | 1 | 0 | 2.444362  | 4.818928  | 2.135926  |
| 52 | 1 | 0 | 3.242700  | 3.317457  | 2.586569  |
| 53 | 1 | 0 | 3.803615  | 4.855331  | 3.266778  |
| 54 | 6 | 0 | 7.635743  | 6.439798  | 0.493025  |
| 55 | 1 | 0 | 7.885681  | 6.966539  | -0.433857 |
| 56 | 1 | 0 | 7.477825  | 7.183821  | 1.279779  |
| 57 | 1 | 0 | 8.515656  | 5.846843  | 0.774354  |
| 58 | 7 | 0 | 0.862298  | -1.315512 | -0.462479 |
| 59 | 7 | 0 | 0.810506  | 1.296015  | -0.426323 |
| 60 | 6 | 0 | -0.651697 | -3.202519 | -0.744947 |
| 61 | 6 | 0 | -0.770185 | 3.133920  | -0.663790 |
| 62 | 1 | 0 | -0.800763 | -3.333777 | -1.824016 |
| 63 | 1 | 0 | -0.766314 | -4.187416 | -0.284456 |
| 64 | 1 | 0 | -0.937814 | 4.087150  | -0.160040 |
| 65 | 1 | 0 | -0.875629 | 3.328861  | -1.738105 |
| 66 | 6 | 0 | -2.351479 | -2.569304 | 1.554661  |
| 67 | 6 | 0 | -3.072953 | -1.500175 | 2.399040  |



|    |   |   |           |           |           |
|----|---|---|-----------|-----------|-----------|
| 68 | 6 | 0 | -3.061070 | -3.929155 | 1.689506  |
| 69 | 1 | 0 | -1.337911 | -2.674820 | 1.964049  |
| 70 | 6 | 0 | -3.134646 | -1.923927 | 3.873713  |
| 71 | 1 | 0 | -4.092728 | -1.359138 | 2.021507  |
| 72 | 1 | 0 | -2.566233 | -0.536065 | 2.302627  |
| 73 | 6 | 0 | -3.114409 | -4.358049 | 3.166021  |
| 74 | 1 | 0 | -4.084833 | -3.843879 | 1.305778  |
| 75 | 1 | 0 | -2.555378 | -4.697556 | 1.094223  |
| 76 | 6 | 0 | -3.803419 | -3.296319 | 4.035332  |
| 77 | 1 | 0 | -3.672468 | -1.164924 | 4.455250  |
| 78 | 1 | 0 | -2.111767 | -1.966469 | 4.274450  |
| 79 | 1 | 0 | -3.635006 | -5.319473 | 3.254061  |
| 80 | 1 | 0 | -2.089279 | -4.516867 | 3.530108  |
| 81 | 1 | 0 | -3.796116 | -3.603385 | 5.088242  |
| 82 | 1 | 0 | -4.858393 | -3.217901 | 3.735300  |
| 83 | 6 | 0 | -3.390603 | -2.289442 | -1.334156 |
| 84 | 6 | 0 | -3.718040 | -3.752580 | -1.698894 |
| 85 | 6 | 0 | -4.659787 | -1.549525 | -0.867846 |
| 86 | 1 | 0 | -3.032772 | -1.793147 | -2.248784 |
| 87 | 6 | 0 | -4.807181 | -3.797879 | -2.784656 |
| 88 | 1 | 0 | -4.076826 | -4.286791 | -0.813624 |
| 89 | 1 | 0 | -2.824522 | -4.278010 | -2.051691 |
| 90 | 6 | 0 | -5.750841 | -1.602065 | -1.947374 |
| 91 | 1 | 0 | -5.036280 | -2.022151 | 0.048168  |
| 92 | 1 | 0 | -4.424350 | -0.510917 | -0.618376 |
| 93 | 6 | 0 | -6.073382 | -3.048933 | -2.345698 |
| 94 | 1 | 0 | -5.044373 | -4.841395 | -3.024977 |
| 95 | 1 | 0 | -4.416310 | -3.340733 | -3.705015 |
| 96 | 1 | 0 | -6.653046 | -1.091601 | -1.588689 |
| 97 | 1 | 0 | -5.404449 | -1.051229 | -2.832681 |

|     |   |   |           |           |           |
|-----|---|---|-----------|-----------|-----------|
| 98  | 1 | 0 | -6.822249 | -3.065710 | -3.146865 |
| 99  | 1 | 0 | -6.518227 | -3.568602 | -1.484848 |
| 100 | 6 | 0 | -2.852993 | 2.311795  | 1.387728  |
| 101 | 6 | 0 | -2.728875 | 3.783662  | 1.826405  |
| 102 | 6 | 0 | -4.316827 | 1.830739  | 1.480207  |
| 103 | 1 | 0 | -2.268108 | 1.718161  | 2.096396  |
| 104 | 6 | 0 | -3.289468 | 3.967378  | 3.247682  |
| 105 | 1 | 0 | -3.271341 | 4.434175  | 1.128902  |
| 106 | 1 | 0 | -1.680788 | 4.100640  | 1.815185  |
| 107 | 6 | 0 | -4.850389 | 2.004057  | 2.909944  |
| 108 | 1 | 0 | -4.942976 | 2.415881  | 0.795170  |
| 109 | 1 | 0 | -4.398313 | 0.783796  | 1.174209  |
| 110 | 6 | 0 | -4.734093 | 3.464154  | 3.368225  |
| 111 | 1 | 0 | -3.226498 | 5.024202  | 3.534350  |
| 112 | 1 | 0 | -2.655094 | 3.409815  | 3.951668  |
| 113 | 1 | 0 | -5.893014 | 1.667235  | 2.959727  |
| 114 | 1 | 0 | -4.274353 | 1.359825  | 3.589517  |
| 115 | 1 | 0 | -5.087817 | 3.570695  | 4.400961  |
| 116 | 1 | 0 | -5.387777 | 4.089105  | 2.742814  |
| 117 | 6 | 0 | -3.361705 | 2.101331  | -1.570567 |
| 118 | 6 | 0 | -3.845005 | 3.557485  | -1.725762 |
| 119 | 6 | 0 | -2.885559 | 1.522842  | -2.919475 |
| 120 | 1 | 0 | -4.212957 | 1.494514  | -1.238391 |
| 121 | 6 | 0 | -4.939071 | 3.659965  | -2.801190 |
| 122 | 1 | 0 | -3.001098 | 4.197664  | -2.015144 |
| 123 | 1 | 0 | -4.223169 | 3.938998  | -0.772576 |
| 124 | 6 | 0 | -3.980301 | 1.644424  | -3.990665 |
| 125 | 1 | 0 | -1.990566 | 2.062892  | -3.258609 |
| 126 | 1 | 0 | -2.592749 | 0.474364  | -2.790593 |
| 127 | 6 | 0 | -4.461313 | 3.093599  | -4.144890 |

|     |   |   |           |           |           |
|-----|---|---|-----------|-----------|-----------|
| 128 | 1 | 0 | -5.249442 | 4.705870  | -2.913878 |
| 129 | 1 | 0 | -5.824051 | 3.100031  | -2.466466 |
| 130 | 1 | 0 | -3.606617 | 1.259415  | -4.947411 |
| 131 | 1 | 0 | -4.831819 | 1.011753  | -3.704219 |
| 132 | 1 | 0 | -5.264436 | 3.150764  | -4.889649 |
| 133 | 1 | 0 | -3.633485 | 3.711173  | -4.522409 |
| 134 | 6 | 0 | 0.124775  | 0.022945  | 2.364555  |
| 135 | 8 | 0 | 0.430158  | -1.110836 | 2.523608  |
| 136 | 8 | 0 | -0.009593 | 1.175652  | 2.606600  |

-----  
**<sup>1</sup>TS17    E(opt) = -3453.678896 hartree**

| Center<br>Number | Atomic<br>Number | Atomic<br>Type | Coordinates (Angstroms) |           |           |
|------------------|------------------|----------------|-------------------------|-----------|-----------|
|                  |                  |                | X                       | Y         | Z         |
| 1                | 77               | 0              | -0.927662               | 0.053036  | -0.583548 |
| 2                | 15               | 0              | -2.182809               | 1.914599  | -0.021333 |
| 3                | 15               | 0              | -2.089796               | -1.891464 | 0.022251  |
| 4                | 6                | 0              | 1.893662                | 0.779339  | -0.126039 |
| 5                | 6                | 0              | 0.486933                | 2.704192  | -0.120828 |
| 6                | 6                | 0              | 3.021016                | 1.606283  | 0.057184  |
| 7                | 6                | 0              | 1.570261                | 3.519819  | 0.095988  |
| 8                | 6                | 0              | 2.883754                | 2.975575  | 0.192199  |
| 9                | 1                | 0              | 4.005852                | 1.155967  | 0.103249  |
| 10               | 1                | 0              | 1.420960                | 4.592432  | 0.159269  |
| 11               | 6                | 0              | 1.916206                | -0.649571 | -0.206783 |
| 12               | 6                | 0              | 0.566470                | -2.605845 | -0.370207 |
| 13               | 6                | 0              | 3.061240                | -1.456626 | -0.049928 |
| 14               | 6                | 0              | 1.669312                | -3.410483 | -0.195968 |
| 15               | 6                | 0              | 2.960167                | -2.834990 | -0.042381 |

|    |   |   |          |           |           |
|----|---|---|----------|-----------|-----------|
| 16 | 1 | 0 | 4.028635 | -0.986640 | 0.083230  |
| 17 | 1 | 0 | 1.546745 | -4.488108 | -0.179754 |
| 18 | 6 | 0 | 4.056809 | 3.869186  | 0.409971  |
| 19 | 6 | 0 | 4.183163 | 4.579994  | 1.626973  |
| 20 | 6 | 0 | 5.041193 | 4.018326  | -0.590937 |
| 21 | 6 | 0 | 5.284269 | 5.420982  | 1.816242  |
| 22 | 6 | 0 | 6.125534 | 4.875589  | -0.362469 |
| 23 | 6 | 0 | 6.265590 | 5.587867  | 0.831602  |
| 24 | 1 | 0 | 5.382267 | 5.955479  | 2.759023  |
| 25 | 1 | 0 | 6.877251 | 4.990232  | -1.140775 |
| 26 | 6 | 0 | 4.160564 | -3.697359 | 0.158824  |
| 27 | 6 | 0 | 4.356924 | -4.342752 | 1.398788  |
| 28 | 6 | 0 | 5.100014 | -3.860159 | -0.881344 |
| 29 | 6 | 0 | 5.493268 | -5.139655 | 1.578512  |
| 30 | 6 | 0 | 6.223188 | -4.666661 | -0.659983 |
| 31 | 6 | 0 | 6.437514 | -5.316262 | 0.560611  |
| 32 | 1 | 0 | 5.647851 | -5.628628 | 2.538202  |
| 33 | 1 | 0 | 6.946671 | -4.792765 | -1.462834 |
| 34 | 6 | 0 | 7.424141 | 6.531456  | 1.046432  |
| 35 | 1 | 0 | 7.139625 | 7.564295  | 0.806494  |
| 36 | 1 | 0 | 7.758331 | 6.524198  | 2.089290  |
| 37 | 1 | 0 | 8.276783 | 6.272098  | 0.411130  |
| 38 | 6 | 0 | 3.164762 | 4.425160  | 2.734120  |
| 39 | 1 | 0 | 2.216373 | 4.915327  | 2.485666  |
| 40 | 1 | 0 | 2.934274 | 3.370814  | 2.922634  |
| 41 | 1 | 0 | 3.531435 | 4.866683  | 3.665193  |
| 42 | 6 | 0 | 4.962789 | 3.272060  | -1.904739 |
| 43 | 1 | 0 | 5.363472 | 2.255759  | -1.794660 |
| 44 | 1 | 0 | 3.933237 | 3.190695  | -2.267472 |
| 45 | 1 | 0 | 5.559685 | 3.771455  | -2.673333 |

|    |   |   |           |           |           |
|----|---|---|-----------|-----------|-----------|
| 46 | 6 | 0 | 3.370830  | -4.163795 | 2.530731  |
| 47 | 1 | 0 | 3.184761  | -3.102877 | 2.733929  |
| 48 | 1 | 0 | 2.398754  | -4.612020 | 2.294309  |
| 49 | 1 | 0 | 3.738941  | -4.628094 | 3.449917  |
| 50 | 6 | 0 | 4.893518  | -3.202179 | -2.226426 |
| 51 | 1 | 0 | 3.947968  | -3.523886 | -2.679152 |
| 52 | 1 | 0 | 4.840232  | -2.111238 | -2.155497 |
| 53 | 1 | 0 | 5.702341  | -3.460726 | -2.916017 |
| 54 | 6 | 0 | 7.638515  | -6.207957 | 0.765383  |
| 55 | 1 | 0 | 7.973884  | -6.195971 | 1.807578  |
| 56 | 1 | 0 | 7.401550  | -7.250043 | 0.513798  |
| 57 | 1 | 0 | 8.477375  | -5.903895 | 0.131275  |
| 58 | 7 | 0 | 0.623925  | 1.335397  | -0.196300 |
| 59 | 7 | 0 | 0.676850  | -1.237908 | -0.389042 |
| 60 | 6 | 0 | -0.900754 | 3.220996  | -0.376673 |
| 61 | 6 | 0 | -0.826095 | -3.144217 | -0.552914 |
| 62 | 1 | 0 | -1.085924 | 4.168667  | 0.132218  |
| 63 | 1 | 0 | -1.001227 | 3.407778  | -1.454795 |
| 64 | 1 | 0 | -1.024035 | -3.308833 | -1.619632 |
| 65 | 1 | 0 | -0.944302 | -4.117207 | -0.071135 |
| 66 | 6 | 0 | -3.611858 | 2.502696  | -1.055890 |
| 67 | 6 | 0 | -4.694902 | 1.431123  | -1.275758 |
| 68 | 6 | 0 | -4.235749 | 3.843130  | -0.621891 |
| 69 | 1 | 0 | -3.120239 | 2.652593  | -2.026087 |
| 70 | 6 | 0 | -5.728402 | 1.909161  | -2.306933 |
| 71 | 1 | 0 | -5.209647 | 1.221423  | -0.331984 |
| 72 | 1 | 0 | -4.230460 | 0.499189  | -1.608734 |
| 73 | 6 | 0 | -5.270260 | 4.314674  | -1.657609 |
| 74 | 1 | 0 | -4.733391 | 3.718260  | 0.347169  |
| 75 | 1 | 0 | -3.461695 | 4.607830  | -0.490240 |

|     |   |   |           |           |           |
|-----|---|---|-----------|-----------|-----------|
| 76  | 6 | 0 | -6.351354 | 3.250840  | -1.896029 |
| 77  | 1 | 0 | -6.507613 | 1.146725  | -2.429684 |
| 78  | 1 | 0 | -5.236782 | 2.021812  | -3.283557 |
| 79  | 1 | 0 | -5.725922 | 5.255237  | -1.324450 |
| 80  | 1 | 0 | -4.756521 | 4.528287  | -2.605766 |
| 81  | 1 | 0 | -7.059783 | 3.593204  | -2.660254 |
| 82  | 1 | 0 | -6.927483 | 3.110947  | -0.969752 |
| 83  | 6 | 0 | -2.572179 | 2.044236  | 1.805726  |
| 84  | 6 | 0 | -2.514087 | 3.449888  | 2.439359  |
| 85  | 6 | 0 | -3.890346 | 1.333592  | 2.168007  |
| 86  | 1 | 0 | -1.750351 | 1.457342  | 2.239328  |
| 87  | 6 | 0 | -2.702830 | 3.357341  | 3.963808  |
| 88  | 1 | 0 | -3.296720 | 4.088534  | 2.014842  |
| 89  | 1 | 0 | -1.553796 | 3.929563  | 2.225022  |
| 90  | 6 | 0 | -4.065346 | 1.243676  | 3.690565  |
| 91  | 1 | 0 | -4.733175 | 1.893516  | 1.745266  |
| 92  | 1 | 0 | -3.917154 | 0.333726  | 1.725493  |
| 93  | 6 | 0 | -4.003627 | 2.633816  | 4.337614  |
| 94  | 1 | 0 | -2.686208 | 4.364584  | 4.397729  |
| 95  | 1 | 0 | -1.850842 | 2.812139  | 4.394860  |
| 96  | 1 | 0 | -5.016260 | 0.750414  | 3.926828  |
| 97  | 1 | 0 | -3.267486 | 0.613455  | 4.106971  |
| 98  | 1 | 0 | -4.093351 | 2.552738  | 5.427767  |
| 99  | 1 | 0 | -4.860493 | 3.229982  | 3.992044  |
| 100 | 6 | 0 | -3.683560 | -2.369609 | -0.830878 |
| 101 | 6 | 0 | -3.846858 | -3.846740 | -1.247830 |
| 102 | 6 | 0 | -4.920105 | -1.896251 | -0.038496 |
| 103 | 1 | 0 | -3.628006 | -1.773748 | -1.752650 |
| 104 | 6 | 0 | -5.133891 | -4.027114 | -2.072119 |
| 105 | 1 | 0 | -3.891686 | -4.486146 | -0.358312 |

|     |   |   |           |           |           |
|-----|---|---|-----------|-----------|-----------|
| 106 | 1 | 0 | -2.990572 | -4.181640 | -1.841351 |
| 107 | 6 | 0 | -6.197304 | -2.066420 | -0.873070 |
| 108 | 1 | 0 | -5.013614 | -2.488443 | 0.880379  |
| 109 | 1 | 0 | -4.806870 | -0.854282 | 0.266345  |
| 110 | 6 | 0 | -6.373771 | -3.524183 | -1.319968 |
| 111 | 1 | 0 | -5.252518 | -5.083638 | -2.341681 |
| 112 | 1 | 0 | -5.032382 | -3.469020 | -3.013960 |
| 113 | 1 | 0 | -7.066768 | -1.734610 | -0.292549 |
| 114 | 1 | 0 | -6.137650 | -1.416144 | -1.757237 |
| 115 | 1 | 0 | -7.266297 | -3.626262 | -1.949247 |
| 116 | 1 | 0 | -6.537284 | -4.153364 | -0.433178 |
| 117 | 6 | 0 | -2.298601 | -2.238596 | 1.852251  |
| 118 | 6 | 0 | -2.674968 | -3.690680 | 2.211384  |
| 119 | 6 | 0 | -1.045221 | -1.798083 | 2.639309  |
| 120 | 1 | 0 | -3.128225 | -1.586110 | 2.154505  |
| 121 | 6 | 0 | -2.880496 | -3.846610 | 3.727867  |
| 122 | 1 | 0 | -1.871992 | -4.367612 | 1.892097  |
| 123 | 1 | 0 | -3.581916 | -3.999222 | 1.684579  |
| 124 | 6 | 0 | -1.247577 | -1.966591 | 4.152121  |
| 125 | 1 | 0 | -0.184919 | -2.404368 | 2.323747  |
| 126 | 1 | 0 | -0.801631 | -0.756809 | 2.400328  |
| 127 | 6 | 0 | -1.638590 | -3.405682 | 4.512675  |
| 128 | 1 | 0 | -3.131320 | -4.889015 | 3.959616  |
| 129 | 1 | 0 | -3.741099 | -3.236330 | 4.037273  |
| 130 | 1 | 0 | -0.332625 | -1.672722 | 4.681383  |
| 131 | 1 | 0 | -2.041038 | -1.283520 | 4.485993  |
| 132 | 1 | 0 | -1.816424 | -3.494905 | 5.591351  |
| 133 | 1 | 0 | -0.802419 | -4.078043 | 4.271564  |
| 134 | 6 | 0 | -1.461497 | 0.137624  | -2.527366 |
| 135 | 8 | 0 | -2.072017 | 0.768560  | -3.318870 |

|     |   |   |           |           |           |
|-----|---|---|-----------|-----------|-----------|
| 136 | 8 | 0 | -0.568999 | -1.157594 | -3.518732 |
| 137 | 6 | 0 | 2.381865  | 0.271847  | -3.360679 |
| 138 | 8 | 0 | 1.842053  | 1.372473  | -3.447758 |
| 139 | 8 | 0 | 3.718477  | 0.162263  | -3.100104 |
| 140 | 8 | 0 | 1.849781  | -0.899263 | -3.517764 |
| 141 | 1 | 0 | 0.727278  | -0.901538 | -3.540298 |
| 142 | 1 | 0 | 4.043220  | 1.069950  | -3.001536 |
| 143 | 1 | 0 | -0.577858 | -1.902051 | -2.901306 |

-----  
**<sup>1</sup>TS18    E(opt) = -3453.568269 hartree**

| Center<br>Number | Atomic<br>Number | Atomic<br>Type | Coordinates (Angstroms) |           |           |
|------------------|------------------|----------------|-------------------------|-----------|-----------|
|                  |                  |                | X                       | Y         | Z         |
| 1                | 77               | 0              | -0.974685               | 0.009905  | -0.541002 |
| 2                | 15               | 0              | -2.190241               | 1.939561  | -0.075105 |
| 3                | 15               | 0              | -2.124004               | -1.950027 | 0.042267  |
| 4                | 6                | 0              | 1.865814                | 0.758000  | -0.307757 |
| 5                | 6                | 0              | 0.477371                | 2.680398  | -0.409760 |
| 6                | 6                | 0              | 2.983962                | 1.558790  | -0.073438 |
| 7                | 6                | 0              | 1.567174                | 3.501570  | -0.166143 |
| 8                | 6                | 0              | 2.845960                | 2.946518  | 0.029406  |
| 9                | 1                | 0              | 3.955076                | 1.102471  | 0.073130  |
| 10               | 1                | 0              | 1.421993                | 4.574438  | -0.115183 |
| 11               | 6                | 0              | 1.876537                | -0.709574 | -0.337298 |
| 12               | 6                | 0              | 0.513527                | -2.649109 | -0.492222 |
| 13               | 6                | 0              | 3.008252                | -1.500951 | -0.155458 |
| 14               | 6                | 0              | 1.620309                | -3.465423 | -0.306988 |
| 15               | 6                | 0              | 2.892029                | -2.891787 | -0.135031 |
| 16               | 1                | 0              | 3.979849                | -1.041331 | -0.022749 |



|    |   |   |          |           |           |
|----|---|---|----------|-----------|-----------|
| 17 | 1 | 0 | 1.494703 | -4.542053 | -0.287766 |
| 18 | 6 | 0 | 4.002727 | 3.816459  | 0.386245  |
| 19 | 6 | 0 | 3.984183 | 4.524759  | 1.609223  |
| 20 | 6 | 0 | 5.111535 | 3.928424  | -0.481659 |
| 21 | 6 | 0 | 5.076145 | 5.336958  | 1.936444  |
| 22 | 6 | 0 | 6.175534 | 4.759915  | -0.116936 |
| 23 | 6 | 0 | 6.177104 | 5.475401  | 1.085412  |
| 24 | 1 | 0 | 5.066256 | 5.872516  | 2.883133  |
| 25 | 1 | 0 | 7.023681 | 4.852914  | -0.791738 |
| 26 | 6 | 0 | 4.097657 | -3.737143 | 0.096015  |
| 27 | 6 | 0 | 4.319589 | -4.292431 | 1.372847  |
| 28 | 6 | 0 | 5.017518 | -3.947502 | -0.951357 |
| 29 | 6 | 0 | 5.474374 | -5.054060 | 1.583046  |
| 30 | 6 | 0 | 6.158350 | -4.717489 | -0.696959 |
| 31 | 6 | 0 | 6.404742 | -5.278393 | 0.561643  |
| 32 | 1 | 0 | 5.654442 | -5.475364 | 2.569702  |
| 33 | 1 | 0 | 6.871367 | -4.882755 | -1.501777 |
| 34 | 6 | 0 | 7.322905 | 6.391926  | 1.437724  |
| 35 | 1 | 0 | 7.399773 | 6.541967  | 2.519053  |
| 36 | 1 | 0 | 8.277831 | 5.997523  | 1.075384  |
| 37 | 1 | 0 | 7.186734 | 7.380055  | 0.979269  |
| 38 | 6 | 0 | 2.830727 | 4.409896  | 2.581957  |
| 39 | 1 | 0 | 1.959794 | 4.986165  | 2.248812  |
| 40 | 1 | 0 | 2.499793 | 3.372771  | 2.700981  |
| 41 | 1 | 0 | 3.117601 | 4.790029  | 3.566410  |
| 42 | 6 | 0 | 5.163325 | 3.183026  | -1.794904 |
| 43 | 1 | 0 | 5.352892 | 2.113726  | -1.640167 |
| 44 | 1 | 0 | 4.221386 | 3.262869  | -2.343835 |
| 45 | 1 | 0 | 5.964778 | 3.570084  | -2.430358 |
| 46 | 6 | 0 | 3.344938 | -4.055100 | 2.503849  |

|    |   |   |           |           |           |
|----|---|---|-----------|-----------|-----------|
| 47 | 1 | 0 | 3.169094  | -2.984696 | 2.663256  |
| 48 | 1 | 0 | 2.367882  | -4.506697 | 2.295499  |
| 49 | 1 | 0 | 3.718315  | -4.480535 | 3.439203  |
| 50 | 6 | 0 | 4.763534  | -3.387166 | -2.331929 |
| 51 | 1 | 0 | 3.872973  | -3.846066 | -2.779719 |
| 52 | 1 | 0 | 4.576722  | -2.308325 | -2.320934 |
| 53 | 1 | 0 | 5.610301  | -3.583305 | -2.995472 |
| 54 | 6 | 0 | 7.628978  | -6.127496 | 0.804481  |
| 55 | 1 | 0 | 7.950450  | -6.077406 | 1.849641  |
| 56 | 1 | 0 | 7.425734  | -7.182034 | 0.577037  |
| 57 | 1 | 0 | 8.465768  | -5.815077 | 0.171653  |
| 58 | 7 | 0 | 0.631629  | 1.331488  | -0.449639 |
| 59 | 7 | 0 | 0.656163  | -1.298522 | -0.507083 |
| 60 | 6 | 0 | -0.917356 | 3.182748  | -0.651410 |
| 61 | 6 | 0 | -0.890129 | -3.154194 | -0.685140 |
| 62 | 1 | 0 | -1.067861 | 4.176876  | -0.227780 |
| 63 | 1 | 0 | -1.076038 | 3.261052  | -1.735309 |
| 64 | 1 | 0 | -1.115571 | -3.182051 | -1.758923 |
| 65 | 1 | 0 | -1.009594 | -4.168161 | -0.299993 |
| 66 | 6 | 0 | -3.694996 | 2.427760  | -1.039764 |
| 67 | 6 | 0 | -4.783257 | 1.339644  | -1.070103 |
| 68 | 6 | 0 | -4.289208 | 3.798572  | -0.661422 |
| 69 | 1 | 0 | -3.284700 | 2.499816  | -2.056548 |
| 70 | 6 | 0 | -5.906257 | 1.729418  | -2.043195 |
| 71 | 1 | 0 | -5.207434 | 1.210386  | -0.068389 |
| 72 | 1 | 0 | -4.343412 | 0.385768  | -1.366992 |
| 73 | 6 | 0 | -5.411343 | 4.180910  | -1.641114 |
| 74 | 1 | 0 | -4.702436 | 3.744838  | 0.352929  |
| 75 | 1 | 0 | -3.512916 | 4.571824  | -0.656597 |
| 76 | 6 | 0 | -6.501074 | 3.100996  | -1.695561 |

|     |   |   |           |           |           |
|-----|---|---|-----------|-----------|-----------|
| 77  | 1 | 0 | -6.686318 | 0.958713  | -2.030625 |
| 78  | 1 | 0 | -5.502165 | 1.756901  | -3.064968 |
| 79  | 1 | 0 | -5.842431 | 5.145795  | -1.348320 |
| 80  | 1 | 0 | -4.981518 | 4.314920  | -2.643874 |
| 81  | 1 | 0 | -7.273153 | 3.376998  | -2.423839 |
| 82  | 1 | 0 | -6.996136 | 3.040592  | -0.715632 |
| 83  | 6 | 0 | -2.373208 | 2.179236  | 1.762182  |
| 84  | 6 | 0 | -2.346974 | 3.629054  | 2.286698  |
| 85  | 6 | 0 | -3.592354 | 1.410026  | 2.307884  |
| 86  | 1 | 0 | -1.468390 | 1.678468  | 2.137537  |
| 87  | 6 | 0 | -2.362723 | 3.632621  | 3.825260  |
| 88  | 1 | 0 | -3.217027 | 4.179906  | 1.913911  |
| 89  | 1 | 0 | -1.453567 | 4.152276  | 1.930576  |
| 90  | 6 | 0 | -3.596506 | 1.421579  | 3.843094  |
| 91  | 1 | 0 | -4.510864 | 1.885234  | 1.941957  |
| 92  | 1 | 0 | -3.591471 | 0.381017  | 1.934304  |
| 93  | 6 | 0 | -3.562556 | 2.856772  | 4.386133  |
| 94  | 1 | 0 | -2.371943 | 4.667400  | 4.187964  |
| 95  | 1 | 0 | -1.432638 | 3.175414  | 4.192093  |
| 96  | 1 | 0 | -4.480765 | 0.889764  | 4.214422  |
| 97  | 1 | 0 | -2.717254 | 0.872761  | 4.208277  |
| 98  | 1 | 0 | -3.530040 | 2.849056  | 5.482229  |
| 99  | 1 | 0 | -4.490632 | 3.371707  | 4.099352  |
| 100 | 6 | 0 | -3.775207 | -2.399968 | -0.679947 |
| 101 | 6 | 0 | -3.957238 | -3.871396 | -1.109967 |
| 102 | 6 | 0 | -4.931740 | -1.959830 | 0.242897  |
| 103 | 1 | 0 | -3.809165 | -1.785617 | -1.589716 |
| 104 | 6 | 0 | -5.313670 | -4.047070 | -1.814724 |
| 105 | 1 | 0 | -3.914562 | -4.525207 | -0.230885 |
| 106 | 1 | 0 | -3.153880 | -4.182303 | -1.785001 |

|     |   |   |           |           |           |
|-----|---|---|-----------|-----------|-----------|
| 107 | 6 | 0 | -6.278510 | -2.123795 | -0.475365 |
| 108 | 1 | 0 | -4.929134 | -2.584520 | 1.144945  |
| 109 | 1 | 0 | -4.797158 | -0.925832 | 0.569836  |
| 110 | 6 | 0 | -6.482003 | -3.573018 | -0.939223 |
| 111 | 1 | 0 | -5.447190 | -5.099138 | -2.093566 |
| 112 | 1 | 0 | -5.304491 | -3.469336 | -2.749939 |
| 113 | 1 | 0 | -7.092879 | -1.816113 | 0.191390  |
| 114 | 1 | 0 | -6.306193 | -1.452014 | -1.344455 |
| 115 | 1 | 0 | -7.427587 | -3.669476 | -1.486163 |
| 116 | 1 | 0 | -6.557835 | -4.224044 | -0.056565 |
| 117 | 6 | 0 | -2.152475 | -2.277443 | 1.875770  |
| 118 | 6 | 0 | -2.387192 | -3.753150 | 2.257544  |
| 119 | 6 | 0 | -0.885881 | -1.726644 | 2.567150  |
| 120 | 1 | 0 | -3.007548 | -1.689112 | 2.232324  |
| 121 | 6 | 0 | -2.473206 | -3.910436 | 3.785047  |
| 122 | 1 | 0 | -1.556068 | -4.364677 | 1.883510  |
| 123 | 1 | 0 | -3.302204 | -4.131896 | 1.792998  |
| 124 | 6 | 0 | -0.976426 | -1.895956 | 4.090430  |
| 125 | 1 | 0 | -0.001513 | -2.262331 | 2.197292  |
| 126 | 1 | 0 | -0.748355 | -0.669489 | 2.310416  |
| 127 | 6 | 0 | -1.220778 | -3.359942 | 4.479594  |
| 128 | 1 | 0 | -2.618725 | -4.967878 | 4.036244  |
| 129 | 1 | 0 | -3.358395 | -3.371314 | 4.151220  |
| 130 | 1 | 0 | -0.056995 | -1.521785 | 4.556905  |
| 131 | 1 | 0 | -1.801548 | -1.277445 | 4.470140  |
| 132 | 1 | 0 | -1.316362 | -3.453805 | 5.567990  |
| 133 | 1 | 0 | -0.349453 | -3.961919 | 4.183445  |
| 134 | 6 | 0 | -1.552924 | -0.032140 | -2.453135 |
| 135 | 8 | 0 | -2.371630 | 0.353641  | -3.204265 |
| 136 | 8 | 0 | -0.288877 | -0.897476 | -3.514235 |

|     |   |   |          |           |           |
|-----|---|---|----------|-----------|-----------|
| 137 | 6 | 0 | 2.335283 | 0.553583  | -3.691173 |
| 138 | 8 | 0 | 2.640393 | -0.541090 | -3.203023 |
| 139 | 8 | 0 | 3.285795 | 1.512197  | -3.889780 |
| 140 | 8 | 0 | 1.166584 | 0.940828  | -4.076002 |
| 141 | 1 | 0 | 0.399138 | 0.031062  | -3.847546 |
| 142 | 1 | 0 | 4.115995 | 1.141015  | -3.550357 |
| 143 | 1 | 0 | 0.345538 | -1.335303 | -2.922816 |

-----  
**<sup>1</sup>TS19    E(opt) = -3453.434347    hartree**  
 -----

| Center<br>Number | Atomic<br>Number | Atomic<br>Type | Coordinates (Angstroms) |           |           |
|------------------|------------------|----------------|-------------------------|-----------|-----------|
|                  |                  |                | X                       | Y         | Z         |
| 1                | 77               | 0              | -0.920616               | -0.000900 | -0.197960 |
| 2                | 15               | 0              | -2.245561               | 1.959807  | -0.176548 |
| 3                | 15               | 0              | -2.109477               | -2.043332 | 0.109855  |
| 4                | 6                | 0              | 1.892642                | 0.841016  | 0.098037  |
| 5                | 6                | 0              | 0.478785                | 2.721737  | -0.173680 |
| 6                | 6                | 0              | 2.997504                | 1.665723  | 0.252191  |
| 7                | 6                | 0              | 1.565673                | 3.581551  | -0.024966 |
| 8                | 6                | 0              | 2.845145                | 3.059806  | 0.192411  |
| 9                | 1                | 0              | 3.979354                | 1.241992  | 0.419471  |
| 10               | 1                | 0              | 1.410789                | 4.651627  | -0.099146 |
| 11               | 6                | 0              | 1.948204                | -0.638570 | 0.108370  |
| 12               | 6                | 0              | 0.664916                | -2.624030 | 0.013529  |
| 13               | 6                | 0              | 3.120893                | -1.373605 | 0.205435  |
| 14               | 6                | 0              | 1.822088                | -3.394446 | 0.100715  |
| 15               | 6                | 0              | 3.074083                | -2.777014 | 0.186841  |
| 16               | 1                | 0              | 4.076026                | -0.872213 | 0.289663  |
| 17               | 1                | 0              | 1.739026                | -4.474840 | 0.088089  |

|    |   |   |          |           |           |
|----|---|---|----------|-----------|-----------|
| 18 | 6 | 0 | 4.026122 | 3.955319  | 0.340352  |
| 19 | 6 | 0 | 4.133204 | 4.798041  | 1.468749  |
| 20 | 6 | 0 | 5.027528 | 3.957362  | -0.653114 |
| 21 | 6 | 0 | 5.252296 | 5.627982  | 1.582398  |
| 22 | 6 | 0 | 6.124106 | 4.813926  | -0.502413 |
| 23 | 6 | 0 | 6.257552 | 5.652945  | 0.608007  |
| 24 | 1 | 0 | 5.341861 | 6.271969  | 2.454457  |
| 25 | 1 | 0 | 6.889286 | 4.826549  | -1.275013 |
| 26 | 6 | 0 | 4.321277 | -3.586363 | 0.252121  |
| 27 | 6 | 0 | 4.530055 | -4.473151 | 1.332656  |
| 28 | 6 | 0 | 5.285119 | -3.468589 | -0.775898 |
| 29 | 6 | 0 | 5.703796 | -5.233547 | 1.361380  |
| 30 | 6 | 0 | 6.434819 | -4.263042 | -0.709075 |
| 31 | 6 | 0 | 6.663298 | -5.151753 | 0.346506  |
| 32 | 1 | 0 | 5.872784 | -5.905734 | 2.199648  |
| 33 | 1 | 0 | 7.171088 | -4.184689 | -1.506050 |
| 34 | 6 | 0 | 7.459562 | 6.550531  | 0.769449  |
| 35 | 1 | 0 | 8.027097 | 6.633712  | -0.162028 |
| 36 | 1 | 0 | 7.164578 | 7.557748  | 1.083436  |
| 37 | 1 | 0 | 8.138099 | 6.160868  | 1.538792  |
| 38 | 6 | 0 | 3.077071 | 4.807765  | 2.550678  |
| 39 | 1 | 0 | 2.161080 | 5.307748  | 2.214780  |
| 40 | 1 | 0 | 2.795137 | 3.792782  | 2.851375  |
| 41 | 1 | 0 | 3.436081 | 5.337426  | 3.437176  |
| 42 | 6 | 0 | 4.923627 | 3.083085  | -1.882824 |
| 43 | 1 | 0 | 5.060469 | 2.023941  | -1.636078 |
| 44 | 1 | 0 | 3.942847 | 3.187849  | -2.360945 |
| 45 | 1 | 0 | 5.688281 | 3.352124  | -2.615982 |
| 46 | 6 | 0 | 3.537170 | -4.603071 | 2.466950  |
| 47 | 1 | 0 | 3.150080 | -3.629857 | 2.786276  |

|    |   |   |           |           |           |
|----|---|---|-----------|-----------|-----------|
| 48 | 1 | 0 | 2.673217  | -5.214259 | 2.181257  |
| 49 | 1 | 0 | 4.003697  | -5.082233 | 3.332029  |
| 50 | 6 | 0 | 5.103605  | -2.521400 | -1.939831 |
| 51 | 1 | 0 | 4.074286  | -2.484234 | -2.305837 |
| 52 | 1 | 0 | 5.363031  | -1.493044 | -1.664548 |
| 53 | 1 | 0 | 5.755920  | -2.806907 | -2.770507 |
| 54 | 6 | 0 | 7.897757  | -6.018668 | 0.373849  |
| 55 | 1 | 0 | 8.183608  | -6.278487 | 1.397835  |
| 56 | 1 | 0 | 7.724077  | -6.959250 | -0.164934 |
| 57 | 1 | 0 | 8.746693  | -5.522415 | -0.107052 |
| 58 | 7 | 0 | 0.662408  | 1.390952  | -0.090539 |
| 59 | 7 | 0 | 0.751490  | -1.280299 | -0.005611 |
| 60 | 6 | 0 | -0.901445 | 3.210309  | -0.518648 |
| 61 | 6 | 0 | -0.701512 | -3.260781 | -0.074071 |
| 62 | 1 | 0 | -1.115766 | 4.164992  | -0.034886 |
| 63 | 1 | 0 | -0.930969 | 3.399396  | -1.599157 |
| 64 | 1 | 0 | -0.795443 | -3.821647 | -1.009065 |
| 65 | 1 | 0 | -0.796869 | -4.019614 | 0.708808  |
| 66 | 6 | 0 | -3.505142 | 2.354159  | -1.472278 |
| 67 | 6 | 0 | -4.528647 | 1.233356  | -1.723225 |
| 68 | 6 | 0 | -4.193659 | 3.718627  | -1.246913 |
| 69 | 1 | 0 | -2.885170 | 2.440133  | -2.373231 |
| 70 | 6 | 0 | -5.423694 | 1.590549  | -2.919408 |
| 71 | 1 | 0 | -5.155425 | 1.097630  | -0.836246 |
| 72 | 1 | 0 | -4.014758 | 0.285336  | -1.907669 |
| 73 | 6 | 0 | -5.092619 | 4.056507  | -2.447561 |
| 74 | 1 | 0 | -4.804436 | 3.675694  | -0.338323 |
| 75 | 1 | 0 | -3.448547 | 4.508536  | -1.101390 |
| 76 | 6 | 0 | -6.116304 | 2.945012  | -2.716086 |
| 77 | 1 | 0 | -6.165667 | 0.797110  | -3.066672 |

|     |   |   |           |           |           |
|-----|---|---|-----------|-----------|-----------|
| 78  | 1 | 0 | -4.809038 | 1.627306  | -3.829739 |
| 79  | 1 | 0 | -5.600469 | 5.010391  | -2.263063 |
| 80  | 1 | 0 | -4.463871 | 4.195737  | -3.337971 |
| 81  | 1 | 0 | -6.725602 | 3.195451  | -3.592423 |
| 82  | 1 | 0 | -6.803192 | 2.873515  | -1.860654 |
| 83  | 6 | 0 | -2.833801 | 2.203856  | 1.572342  |
| 84  | 6 | 0 | -2.829157 | 3.656732  | 2.091452  |
| 85  | 6 | 0 | -4.203702 | 1.529397  | 1.801040  |
| 86  | 1 | 0 | -2.082920 | 1.643646  | 2.148930  |
| 87  | 6 | 0 | -3.231395 | 3.687233  | 3.576093  |
| 88  | 1 | 0 | -3.530206 | 4.263026  | 1.507107  |
| 89  | 1 | 0 | -1.836368 | 4.103399  | 1.979795  |
| 90  | 6 | 0 | -4.586310 | 1.572944  | 3.287337  |
| 91  | 1 | 0 | -4.968495 | 2.057401  | 1.220519  |
| 92  | 1 | 0 | -4.187295 | 0.495848  | 1.443781  |
| 93  | 6 | 0 | -4.587346 | 3.011968  | 3.818342  |
| 94  | 1 | 0 | -3.251345 | 4.726988  | 3.922695  |
| 95  | 1 | 0 | -2.459371 | 3.170342  | 4.163778  |
| 96  | 1 | 0 | -5.570520 | 1.109603  | 3.423244  |
| 97  | 1 | 0 | -3.869109 | 0.972519  | 3.863020  |
| 98  | 1 | 0 | -4.829498 | 3.022764  | 4.887560  |
| 99  | 1 | 0 | -5.373866 | 3.584934  | 3.307288  |
| 100 | 6 | 0 | -3.535745 | -2.541930 | -0.957121 |
| 101 | 6 | 0 | -3.642467 | -4.050469 | -1.262277 |
| 102 | 6 | 0 | -4.859653 | -2.008679 | -0.364187 |
| 103 | 1 | 0 | -3.346470 | -2.012649 | -1.900779 |
| 104 | 6 | 0 | -4.816853 | -4.304599 | -2.223983 |
| 105 | 1 | 0 | -3.797028 | -4.605454 | -0.329058 |
| 106 | 1 | 0 | -2.720074 | -4.422495 | -1.718649 |
| 107 | 6 | 0 | -6.011566 | -2.250104 | -1.349291 |



|     |   |   |           |           |           |
|-----|---|---|-----------|-----------|-----------|
| 108 | 1 | 0 | -5.076313 | -2.534686 | 0.572478  |
| 109 | 1 | 0 | -4.781266 | -0.946893 | -0.124568 |
| 110 | 6 | 0 | -6.139604 | -3.741715 | -1.686807 |
| 111 | 1 | 0 | -4.904859 | -5.381359 | -2.409243 |
| 112 | 1 | 0 | -4.588504 | -3.832655 | -3.189887 |
| 113 | 1 | 0 | -6.945187 | -1.870501 | -0.918168 |
| 114 | 1 | 0 | -5.826479 | -1.676941 | -2.268224 |
| 115 | 1 | 0 | -6.940683 | -3.899783 | -2.418392 |
| 116 | 1 | 0 | -6.424661 | -4.291346 | -0.778614 |
| 117 | 6 | 0 | -2.542546 | -2.095065 | 1.909160  |
| 118 | 6 | 0 | -2.997151 | -3.467705 | 2.442679  |
| 119 | 6 | 0 | -1.352181 | -1.547147 | 2.730667  |
| 120 | 1 | 0 | -3.376018 | -1.388553 | 2.000562  |
| 121 | 6 | 0 | -3.358238 | -3.358824 | 3.933943  |
| 122 | 1 | 0 | -2.186792 | -4.197917 | 2.323890  |
| 123 | 1 | 0 | -3.853750 | -3.839969 | 1.873730  |
| 124 | 6 | 0 | -1.711992 | -1.454517 | 4.219779  |
| 125 | 1 | 0 | -0.485859 | -2.210263 | 2.611301  |
| 126 | 1 | 0 | -1.045654 | -0.558417 | 2.354966  |
| 127 | 6 | 0 | -2.186805 | -2.810521 | 4.760395  |
| 128 | 1 | 0 | -3.662556 | -4.343371 | 4.307268  |
| 129 | 1 | 0 | -4.225412 | -2.692828 | 4.044200  |
| 130 | 1 | 0 | -0.843028 | -1.097401 | 4.784683  |
| 131 | 1 | 0 | -2.508676 | -0.710705 | 4.350540  |
| 132 | 1 | 0 | -2.476631 | -2.715088 | 5.813257  |
| 133 | 1 | 0 | -1.352829 | -3.525583 | 4.722875  |
| 134 | 6 | 0 | -1.086937 | 0.021502  | -2.079970 |
| 135 | 8 | 0 | -1.447816 | 0.550013  | -3.047622 |
| 136 | 8 | 0 | -0.412893 | -1.699212 | -2.906186 |
| 137 | 6 | 0 | 2.310875  | -0.186435 | -3.046116 |

|     |   |   |           |           |           |
|-----|---|---|-----------|-----------|-----------|
| 138 | 8 | 0 | 1.539826  | 0.764151  | -2.818956 |
| 139 | 8 | 0 | 3.636506  | 0.079078  | -3.289830 |
| 140 | 8 | 0 | 2.028013  | -1.428717 | -3.086927 |
| 141 | 1 | 0 | 0.660252  | -1.572854 | -2.974457 |
| 142 | 1 | 0 | 3.722052  | 1.043777  | -3.242687 |
| 143 | 1 | 0 | -0.555037 | -2.528793 | -2.431316 |

-----

**<sup>1</sup>TS20     E(opt) = -3265.072905 hartree**

-----

| Center<br>Number | Atomic<br>Number | Atomic<br>Type | Coordinates (Angstroms) |           |           |
|------------------|------------------|----------------|-------------------------|-----------|-----------|
|                  |                  |                | X                       | Y         | Z         |
| 1                | 77               | 0              | -0.817076               | 0.063242  | -0.132376 |
| 2                | 15               | 0              | -2.035825               | -1.873928 | -0.334257 |
| 3                | 15               | 0              | -2.160674               | 1.921674  | -0.058947 |
| 4                | 6                | 0              | 2.015156                | -0.548868 | -0.547889 |
| 5                | 6                | 0              | 0.669827                | -2.484211 | -0.828567 |
| 6                | 6                | 0              | 3.175590                | -1.326737 | -0.625042 |
| 7                | 6                | 0              | 1.799980                | -3.281124 | -0.895961 |
| 8                | 6                | 0              | 3.083780                | -2.706568 | -0.776735 |
| 9                | 1                | 0              | 4.149314                | -0.857263 | -0.546606 |
| 10               | 1                | 0              | 1.692924                | -4.349437 | -1.052223 |
| 11               | 6                | 0              | 1.978000                | 0.899062  | -0.399861 |
| 12               | 6                | 0              | 0.534247                | 2.779542  | -0.258384 |
| 13               | 6                | 0              | 3.098056                | 1.734357  | -0.321047 |
| 14               | 6                | 0              | 1.625085                | 3.628169  | -0.166951 |
| 15               | 6                | 0              | 2.937899                | 3.110237  | -0.183236 |
| 16               | 1                | 0              | 4.093977                | 1.308156  | -0.352175 |
| 17               | 1                | 0              | 1.462335                | 4.697547  | -0.084653 |
| 18               | 6                | 0              | 4.311394                | -3.554451 | -0.806986 |

|    |   |   |          |           |           |
|----|---|---|----------|-----------|-----------|
| 19 | 6 | 0 | 4.811564 | -4.035354 | -2.033867 |
| 20 | 6 | 0 | 4.970590 | -3.862012 | 0.401440  |
| 21 | 6 | 0 | 5.971314 | -4.819378 | -2.031689 |
| 22 | 6 | 0 | 6.126733 | -4.649638 | 0.360107  |
| 23 | 6 | 0 | 6.642197 | -5.138985 | -0.845801 |
| 24 | 1 | 0 | 6.362285 | -5.184315 | -2.979120 |
| 25 | 1 | 0 | 6.635539 | -4.887795 | 1.291879  |
| 26 | 6 | 0 | 4.119666 | 4.011214  | -0.050235 |
| 27 | 6 | 0 | 4.475745 | 4.873662  | -1.109252 |
| 28 | 6 | 0 | 4.875569 | 4.001138  | 1.141561  |
| 29 | 6 | 0 | 5.587042 | 5.710407  | -0.958151 |
| 30 | 6 | 0 | 5.976816 | 4.858526  | 1.252695  |
| 31 | 6 | 0 | 6.351602 | 5.717489  | 0.214193  |
| 32 | 1 | 0 | 5.863513 | 6.371287  | -1.777026 |
| 33 | 1 | 0 | 6.553255 | 4.857453  | 2.175332  |
| 34 | 6 | 0 | 7.872495 | -6.013874 | -0.863345 |
| 35 | 1 | 0 | 7.602975 | -7.072339 | -0.752361 |
| 36 | 1 | 0 | 8.420872 | -5.916227 | -1.805744 |
| 37 | 1 | 0 | 8.552929 | -5.765756 | -0.042383 |
| 38 | 6 | 0 | 4.121621 | -3.697290 | -3.334903 |
| 39 | 1 | 0 | 3.106370 | -4.108966 | -3.370549 |
| 40 | 1 | 0 | 4.025202 | -2.612892 | -3.464185 |
| 41 | 1 | 0 | 4.675934 | -4.093950 | -4.189986 |
| 42 | 6 | 0 | 4.424576 | -3.369676 | 1.721240  |
| 43 | 1 | 0 | 4.374320 | -2.276320 | 1.760935  |
| 44 | 1 | 0 | 3.402557 | -3.727029 | 1.886027  |
| 45 | 1 | 0 | 5.042092 | -3.714365 | 2.555912  |
| 46 | 6 | 0 | 3.685212 | 4.893226  | -2.397485 |
| 47 | 1 | 0 | 3.554499 | 3.883105  | -2.801851 |
| 48 | 1 | 0 | 2.680565 | 5.305436  | -2.248693 |

|    |   |   |           |           |           |
|----|---|---|-----------|-----------|-----------|
| 49 | 1 | 0 | 4.186376  | 5.501581  | -3.155493 |
| 50 | 6 | 0 | 4.504673  | 3.098233  | 2.296410  |
| 51 | 1 | 0 | 3.443086  | 3.188863  | 2.552403  |
| 52 | 1 | 0 | 4.680378  | 2.043111  | 2.058166  |
| 53 | 1 | 0 | 5.091919  | 3.341141  | 3.186492  |
| 54 | 6 | 0 | 7.564015  | 6.607894  | 0.341329  |
| 55 | 1 | 0 | 7.423816  | 7.554483  | -0.190875 |
| 56 | 1 | 0 | 7.788771  | 6.832636  | 1.388681  |
| 57 | 1 | 0 | 8.452093  | 6.124902  | -0.086765 |
| 58 | 7 | 0 | 0.779670  | -1.141728 | -0.620105 |
| 59 | 7 | 0 | 0.712480  | 1.431575  | -0.346260 |
| 60 | 6 | 0 | -0.724820 | -2.997675 | -1.070368 |
| 61 | 6 | 0 | -0.886284 | 3.279960  | -0.332713 |
| 62 | 1 | 0 | -0.888519 | -2.992037 | -2.155912 |
| 63 | 1 | 0 | -0.832297 | -4.033113 | -0.736728 |
| 64 | 1 | 0 | -1.033216 | 4.122069  | 0.346411  |
| 65 | 1 | 0 | -1.049237 | 3.672714  | -1.343465 |
| 66 | 6 | 0 | -2.450134 | -2.741453 | 1.270657  |
| 67 | 6 | 0 | -3.250898 | -1.866641 | 2.256036  |
| 68 | 6 | 0 | -3.090744 | -4.138198 | 1.162141  |
| 69 | 1 | 0 | -1.444316 | -2.857010 | 1.698930  |
| 70 | 6 | 0 | -3.312931 | -2.532088 | 3.639431  |
| 71 | 1 | 0 | -4.271521 | -1.722259 | 1.881087  |
| 72 | 1 | 0 | -2.793756 | -0.877243 | 2.337389  |
| 73 | 6 | 0 | -3.151632 | -4.811564 | 2.544103  |
| 74 | 1 | 0 | -4.110093 | -4.040093 | 0.768961  |
| 75 | 1 | 0 | -2.538015 | -4.775483 | 0.462821  |
| 76 | 6 | 0 | -3.910437 | -3.944015 | 3.558364  |
| 77 | 1 | 0 | -3.899819 | -1.909162 | 4.326431  |
| 78 | 1 | 0 | -2.294316 | -2.587667 | 4.047406  |

|     |   |   |           |           |           |
|-----|---|---|-----------|-----------|-----------|
| 79  | 1 | 0 | -3.623627 | -5.798218 | 2.456961  |
| 80  | 1 | 0 | -2.126977 | -4.980304 | 2.905016  |
| 81  | 1 | 0 | -3.904403 | -4.420411 | 4.546630  |
| 82  | 1 | 0 | -4.963352 | -3.870847 | 3.248930  |
| 83  | 6 | 0 | -3.464729 | -2.018281 | -1.532050 |
| 84  | 6 | 0 | -3.744793 | -3.402464 | -2.155333 |
| 85  | 6 | 0 | -4.761139 | -1.425735 | -0.946084 |
| 86  | 1 | 0 | -3.134539 | -1.354932 | -2.344094 |
| 87  | 6 | 0 | -4.831263 | -3.286668 | -3.239102 |
| 88  | 1 | 0 | -4.084721 | -4.100360 | -1.383317 |
| 89  | 1 | 0 | -2.836421 | -3.827381 | -2.594613 |
| 90  | 6 | 0 | -5.850612 | -1.313738 | -2.022433 |
| 91  | 1 | 0 | -5.121833 | -2.074720 | -0.138352 |
| 92  | 1 | 0 | -4.566742 | -0.444901 | -0.503772 |
| 93  | 6 | 0 | -6.123362 | -2.672201 | -2.682644 |
| 94  | 1 | 0 | -5.032702 | -4.276245 | -3.667422 |
| 95  | 1 | 0 | -4.454476 | -2.657075 | -4.057992 |
| 96  | 1 | 0 | -6.770054 | -0.909623 | -1.580971 |
| 97  | 1 | 0 | -5.523921 | -0.596772 | -2.788192 |
| 98  | 1 | 0 | -6.869036 | -2.566563 | -3.480196 |
| 99  | 1 | 0 | -6.552946 | -3.355133 | -1.935512 |
| 100 | 6 | 0 | -2.993887 | 2.283419  | 1.590194  |
| 101 | 6 | 0 | -3.039050 | 3.736705  | 2.101608  |
| 102 | 6 | 0 | -4.394973 | 1.639158  | 1.646533  |
| 103 | 1 | 0 | -2.349183 | 1.720714  | 2.278666  |
| 104 | 6 | 0 | -3.630547 | 3.789152  | 3.522064  |
| 105 | 1 | 0 | -3.644660 | 4.359359  | 1.432495  |
| 106 | 1 | 0 | -2.033209 | 4.169391  | 2.120499  |
| 107 | 6 | 0 | -4.968284 | 1.689902  | 3.069904  |
| 108 | 1 | 0 | -5.074014 | 2.175774  | 0.971464  |

|     |   |   |           |           |           |
|-----|---|---|-----------|-----------|-----------|
| 109 | 1 | 0 | -4.350801 | 0.603615  | 1.299277  |
| 110 | 6 | 0 | -5.015219 | 3.131303  | 3.594215  |
| 111 | 1 | 0 | -3.683514 | 4.831121  | 3.860945  |
| 112 | 1 | 0 | -2.948971 | 3.267006  | 4.208856  |
| 113 | 1 | 0 | -5.970096 | 1.242971  | 3.083464  |
| 114 | 1 | 0 | -4.338355 | 1.080069  | 3.733068  |
| 115 | 1 | 0 | -5.392357 | 3.152854  | 4.624059  |
| 116 | 1 | 0 | -5.723061 | 3.711879  | 2.984976  |
| 117 | 6 | 0 | -3.433178 | 2.248859  | -1.389139 |
| 118 | 6 | 0 | -4.033170 | 3.669400  | -1.391900 |
| 119 | 6 | 0 | -2.876731 | 1.884752  | -2.781471 |
| 120 | 1 | 0 | -4.239787 | 1.540237  | -1.162719 |
| 121 | 6 | 0 | -5.096397 | 3.821436  | -2.493004 |
| 122 | 1 | 0 | -3.235792 | 4.406178  | -1.559765 |
| 123 | 1 | 0 | -4.480997 | 3.898872  | -0.421326 |
| 124 | 6 | 0 | -3.944424 | 2.048029  | -3.873612 |
| 125 | 1 | 0 | -2.023742 | 2.536421  | -3.019144 |
| 126 | 1 | 0 | -2.489977 | 0.859673  | -2.767822 |
| 127 | 6 | 0 | -4.536599 | 3.463394  | -3.875271 |
| 128 | 1 | 0 | -5.486788 | 4.846610  | -2.489823 |
| 129 | 1 | 0 | -5.943389 | 3.158653  | -2.264069 |
| 130 | 1 | 0 | -3.510273 | 1.811608  | -4.853032 |
| 131 | 1 | 0 | -4.750069 | 1.321047  | -3.700032 |
| 132 | 1 | 0 | -5.319740 | 3.550021  | -4.638480 |
| 133 | 1 | 0 | -3.750316 | 4.183816  | -4.143938 |
| 134 | 6 | 0 | 1.553318  | -1.467204 | 3.095729  |
| 135 | 8 | 0 | 2.234890  | -0.518338 | 2.695467  |
| 136 | 8 | 0 | 2.145624  | -2.461911 | 3.843597  |
| 137 | 8 | 0 | 0.296561  | -1.688229 | 2.931335  |
| 138 | 1 | 0 | -0.266738 | -0.704669 | 2.218001  |

|     |   |   |           |           |          |
|-----|---|---|-----------|-----------|----------|
| 139 | 1 | 0 | 3.082426  | -2.215905 | 3.903135 |
| 140 | 1 | 0 | -0.758162 | 0.000234  | 1.765373 |

---

Reference:

- (1) J. T. Muckerman, P. Achord, C. Creutz, D. E. Polyansky and E. Fujita, *P. Natl. Acad. Sci. USA*, 2012, **109**, 15657—15662.
- (2) B. Mondal, F. Neese and S. Ye, *Inorg. Chem.*, 2016, **55**, 5438—5444.
- (3) K. M. Waldie, A. L. Ostericher, M. H. Reineke, A. F. Sasayama and C. P. Kubiak, *ACS Catal.*, 2018, **8**, 1313—1324.
- (4) C. J. Curtis, A. Miedaner, W. W. Ellis and D. L. DuBois, *J. Am. Chem. Soc.*, 2002, **124**, 1918—1925.
- (5) A. Taheri and L. A. Berben, *Inorg. Chem.*, 2016, **55**, 378—385.
- (6) A. S. Goodfellow and M. Bühl, *Molecules*, 2021, **26**, 4072.
